# Supplementary material
Source: publisher figshare collection journal article supplement (https://gsajournals.figshare.com/ndownloader/files/14566283)
Supplement: Supplementary file 1 [file 14566283]

## Sheet: small RNA-seq
	WT-A reads	WT-B reads	ago1 lfcSE	ago1 log2FoldChange	ago1 padj	ago1 pvalue	ago1 stat	ago1-A reads	ago1-B reads	baseMean	clr4 lfcSE	clr4 log2FoldChange	clr4 padj	clr4 pvalue	clr4 stat	clr4-A reads	clr4-B reads	ezh2 lfcSE	ezh2 log2FoldChange	ezh2 padj	ezh2 pvalue	ezh2 stat	ezh2-A reads	ezh2-B reads	rde1 lfcSE	rde1 log2FoldChange	rde1 padj	rde1 pvalue	rde1 stat	rde1-A reads	rde1-B reads	rde2 lfcSE	rde2 log2FoldChange	rde2 padj	rde2 pvalue	rde2 stat	rde2-A reads	rde2-B reads	rde3 lfcSE	rde3 log2FoldChange	rde3 padj	rde3 pvalue	rde3 stat	rde3-A reads	rde3-B reads	rde4 lfcSE	rde4 log2FoldChange	rde4 padj	rde4 pvalue
CNAG_00001	2	0	2.02728	-1.43674	0.999845	0.478508	-0.708705	3	4	1.5727	2.367	-1.36825		0.563227	-0.578055	1	0	0.485569	2.74515	1.67929e-05	1.57237e-08	5.65347	3	1	1.48474	-5.68658	0.001692	0.000128129	-3.83003	2	4	0.724444	-2.84001	0.00324046	8.84535e-05	-3.92026	8	3	0.803033	-3.80944	3.10764e-05	2.09731e-06	-4.74381	8	6	0.954529	-4.91823	3.74318e-06	2.57006e-07
CNAG_00002	2	5	1.01702	0.658733	0.999845	0.517172	0.647711	32	27	4.58743	1.17859	0.160892	0.971428	0.891417	0.136512	5	1	3.43826	0.497795		0.884884	0.144781	6	0	3.26957	0.831395		0.799277	0.254283	9	10	3.4663	-1.99167		0.565575	-0.57458	7	15	3.4663	-2.48612		0.473234	-0.717227	19	18	3.4663	-2.89054		0.404339
CNAG_00003	2	4	1.13195	0.437207	0.999845	0.699317	0.386243	20	25	4.87732	1.20384	1.23187	0.68709	0.306177	1.02328	3	6	1.74694	1.77854		0.308635	1.01809	3	6	1.85081	-0.613487		0.74029	-0.33147	5	9	2.15227	-2.19478		0.307848	-1.01975	15	8	1.80706	-0.62974		0.727474	-0.348488	20	17	1.78094	-0.746545		0.67508
CNAG_00004	3	12	0.838327	0.283824	0.999845	0.734941	0.338561	39	52	13.1454	0.87347	1.44625	0.407095	0.0977717	1.65575	10	14	2.03889	1.44798		0.477592	0.71018	12	9	1.78993	2.9525		0.0990441	1.64951	30	10	2.21488	-0.589046		0.790278	-0.265949	19	16	1.92543	0.571265		0.7667	0.296694	30	40	1.89011	0.489932		0.795474
CNAG_00005	4	8	1.00081	-0.218069	0.999845	0.827513	-0.217892	33	26	5.41388	1.07933	0.297917	0.939482	0.782532	0.276021	4	6	0.715078	0.713405	0.535869	0.318444	0.997661	3	5	0.677274	0.0985801	0.975294	0.884273	0.145554	8	12	0.653506	0.711035	0.584221	0.276582	1.08803	22	23	0.633705	0.845542	0.397425	0.182111	1.33428	36	49	0.620565	1.06792	0.364441	0.0852726
CNAG_00006	13	80	0.48545	0.297849	0.999845	0.539511	0.613552	289	237	37.2107	0.526233	-0.202074	0.919247	0.700978	-0.384001	33	17	2.50204	2.10113		0.40104	0.839765	27	7	2.23695	2.80878		0.20925	1.25563	129	124	2.37903	1.71487		0.471017	0.720826	123	145	2.23695	2.40599		0.282122	1.07557	316	295	2.19374	2.66623		0.22422
CNAG_00007	11	40	0.592354	0.0844685	0.999845	0.886608	0.142598	128	146	23.3185	0.645743	-0.187696	0.938068	0.771306	-0.290667	29	5	1.67034	-3.85784		0.0209095	-2.30961	13	0	0.889504	1.02658	0.680447	0.248456	1.15411	47	55	1.12487	-1.66139		0.139686	-1.47696	86	88	1.008	-1.28668	0.423386	0.201791	-1.27647	163	163	0.900853	-0.100106	0.97842	0.911518
CNAG_00008	10	34	0.533604	-0.353417	0.999845	0.507766	-0.66232	98	79	16.7934	0.624465	-0.69476	0.64741	0.265894	-1.11257	13	6	1.33484	0.179879		0.892804	0.134757	9	1	1.08715	2.1309	0.297886	0.0499866	1.96008	45	42	1.35906	-1.08312		0.425475	-0.796958	30	53	1.13702	0.429086		0.705892	0.377379	112	114	1.08298	1.5079	0.504499	0.163815
CNAG_00009	3	8	0.876379	0.135077	0.999845	0.877507	0.154131	28	36	6.344	0.96355	0.553861	0.862374	0.565418	0.574813	6	5	2.10251	3.41271		0.104556	1.62316	6	1	1.92317	5.65684		0.0032672	2.94141	11	5	2.18449	1.74479		0.424454	0.798718	15	15	2.38904	-1.0461		0.661476	-0.437876	33	41	1.97818	2.86018		0.148216
CNAG_00010	6	17	0.62696	-0.164494	0.999845	0.793039	-0.262367	52	56	11.7077	0.696034	0.29793	0.904954	0.668622	0.42804	13	7	1.72833	-1.40938		0.414809	-0.815459	13	1	1.15374	1.10281	0.755937	0.339148	0.955851	48	23	1.36091	-0.944638		0.487605	-0.694124	37	31	1.26411	-0.750167		0.55289	-0.593435	49	55	1.21185	-0.623491		0.606905
CNAG_00011	0	25	1.31421	0.805054	0.999845	0.540156	0.612577	71	84	14.2056	1.37088	0.217443	0.968419	0.873972	0.158616	16	1	1.13172	1.68553		0.136395	1.48935	24	2	1.11977	0.636703	0.893226	0.569628	0.568599	34	31	1.33275	-1.07462		0.420061	-0.806315	66	14	1.10102	0.541802		0.622656	0.49209	35	29	1.10441	0.0756783	0.990725	0.945369
CNAG_00012	9	25	0.602143	0.442797	0.999845	0.462115	0.735369	110	136	15.8589	0.671745	-0.0872343	0.971773	0.896675	-0.129862	18	6	2.14848	2.09921		0.328536	0.977068	14	4	2.04495	2.18757		0.284734	1.06975	50	65	2.44314	-1.99627		0.413878	-0.817089	51	50	2.08807	1.09875		0.598749	0.5262	129	146	2.00692	2.45571		0.221095
CNAG_00013	2	5	0.932602	0.401901	0.999845	0.666508	0.430945	28	21	6.03291	1.04106	0.783656	0.79412	0.451599	0.752752	7	2	0.625509	-0.106363	0.920727	0.864977	-0.170042	9	3	0.532746	0.500536	0.761276	0.347453	0.939541	12	4	0.522487	1.01655	0.243153	0.0517041	1.94559	14	14	0.506086	1.59345	0.0122608	0.00164067	3.14858	27	22	0.506248	1.17201	0.14229	0.0206084
CNAG_00014	1	16	0.888026	0.489829	0.999845	0.581227	0.551593	40	62	9.44614	0.939406	1.0184	0.660126	0.278323	1.08409	11	8	0.821358	0.176088	0.896671	0.830245	0.214387	12	9	0.692261	1.23057	0.383983	0.0754676	1.77761	36	19	0.773643	-0.415927	0.826499	0.590838	-0.537622	31	20	0.816447	-1.39449	0.248727	0.0876363	-1.708	73	55	0.69553	0.300689	0.878127	0.665512
CNAG_00015	3	2	1.46214	-1.85573	0.999845	0.204373	-1.26919	7	3	3.21362	1.54793	-0.015463		0.99203	-0.00998945	1	3	0.883733	-2.92402	0.026812	0.000937247	-3.30872	7	4	0.737804	-0.452161	0.878825	0.539977	-0.612847	11	5	0.744307	-0.911361	0.525411	0.220785	-1.22444	16	9	0.731045	0.145479	0.933485	0.842261	0.199002	21	24	0.732715	-0.575739	0.768313	0.432008
CNAG_00016	10	30	0.583622	-0.261378	0.999845	0.654258	-0.447854	102	74	20.2214	0.630462	0.209901	0.92845	0.739185	0.332932	17	14	2.12695	-0.361444		0.865061	-0.169935	20	6	1.70174	2.06418		0.225137	1.21298	23	47	2.19457	-2.98948		0.17313	-1.36221	65	52	2.15822	-2.07832		0.335558	-0.96298	106	110	1.71749	0.84222		0.623866
CNAG_00017	5	4	1.0354	-0.308657	0.999845	0.765623	-0.298105	25	25	5.15305	1.1224	0.232143	0.954869	0.836146	0.206826	7	3	1.07419	-0.24766		0.817661	-0.230554	7	3	0.967423	-0.351669	0.942476	0.716223	-0.363511	9	11	1.11656	-1.67723		0.133061	-1.50214	13	15	0.953897	-0.544931		0.567818	-0.571269	18	20	0.923234	-0.323145	0.908581	0.726328
CNAG_00018	13	23	0.626897	-0.363939	0.999845	0.56155	-0.58054	86	80	19.4622	0.677984	-0.0142985	0.994371	0.983174	-0.0210897	15	12	0.513984	-0.624378	0.442154	0.22445	-1.21478	8	8	0.505724	-1.51423	0.0294789	0.0027518	-2.99418	35	33	0.486027	0.0242586	0.981788	0.960192	0.0499121	51	50	0.487127	-0.609507	0.43559	0.210851	-1.25123	77	94	0.481743	-0.246061	0.852959	0.60951
CNAG_00019	7	93	0.916934	-1.07195	0.999845	0.242382	-1.16905	94	93	41.5423	0.92015	1.37741	0.467656	0.134409	1.49694	43	70	1.29457	-0.278608		0.829601	-0.215213	40	20	1.10662	-0.124136	0.982864	0.910684	-0.112176	48	41	1.04006	0.943197		0.364475	0.906872	121	98	1.04898	0.27308		0.794611	0.260328	133	138	1.00024	1.18708	0.590887	0.235307
CNAG_00020	18	40	0.564801	-0.481656	0.999845	0.393776	-0.852789	92	143	28.0601	0.593143	0.306893	0.881449	0.604875	0.517402	32	21	0.805886	-1.17945	0.345776	0.143318	-1.46355	32	6	0.589428	0.582942	0.75471	0.322665	0.988996	80	75	0.635923	-0.517758	0.697042	0.41554	-0.814184	73	81	0.629657	-0.894105	0.36144	0.155612	-1.41999	212	185	0.589461	-0.226749	0.89419	0.70048
CNAG_00021	14	31	0.707111	-0.285004	0.999845	0.686908	-0.403055	98	113	17.7384	0.802173	-1.25243	0.439942	0.118455	-1.56129	8	6	0.706507	0.129165	0.913682	0.854937	0.182823	9	5	0.662123	-0.174187	0.952473	0.792494	-0.263074	47	47	0.742999	-1.50451	0.216682	0.0428757	-2.02492	63	57	0.768152	-2.27226	0.0211134	0.00309551	-2.95809	113	146	0.774138	-2.73572	0.00452164	0.000409486
CNAG_00022	11	16	0.741729	-0.11879	0.999845	0.872761	-0.160152	96	60	17.2408	0.786275	0.298261	0.920729	0.70444	0.379334	21	8	6.76668	0.581073		0.931568	0.0858726	17	4	6.76668	-0.636661		0.92504	-0.0940876	39	33	6.76668	-0.551636		0.935027	-0.0815223	61	50	6.76668	-1.04608		0.877142	-0.154593	112	95	6.6664	1.5155		0.820164
CNAG_00023	0	1	1.67323	2.39985	0.999845	0.151497	1.43426	7	22	3.77926	1.71366	3.8745	0.185936	0.0237624	2.26095	5	5	1.002	3.38023	0.0235472	0.000742279	3.37347	10	4	1.04774	1.20303	0.683819	0.250882	1.14821	10	2	1.02173	1.75506	0.331041	0.0858474	1.71772	9	2	0.987777	2.23785	0.10148	0.0234793	2.26554	7	7	0.975947	2.40431	0.104821	0.0137562
CNAG_00024	82	288	0.370121	-0.0218454	0.999845	0.952934	-0.0590224	998	871	139.935	0.385953	-0.534945	0.517632	0.165736	-1.38604	147	43	0.703691	-0.209877	0.871924	0.765511	-0.298252	82	36	0.612246	0.349084	0.893226	0.568563	0.57017	399	436	0.635992	-0.23146	0.88276	0.715907	-0.363935	676	809	0.685779	-1.60265	0.0905037	0.0194403	-2.33698	1284	1274	0.684433	-1.98823	0.0340302	0.00367335
CNAG_00025	6	22	0.69256	-0.419842	0.999845	0.544371	-0.606217	54	52	11.5846	0.737007	0.509944	0.819609	0.488993	0.691912	20	8	0.597931	-1.07406	0.24383	0.0724489	-1.79629	12	7	0.551567	0.176292	0.94877	0.749257	0.31962	34	31	0.548698	0.744645	0.46885	0.174745	1.35711	38	40	0.545318	1.06432	0.175631	0.0509686	1.95174	65	84	0.544862	0.815707	0.458584	0.13437
CNAG_00026	14	76	0.598904	0.204062	0.999845	0.73331	0.340725	259	224	36.3149	0.641716	-0.508689	0.778325	0.427951	-0.792702	39	6	1.44842	-1.43555		0.321631	-0.991111	23	12	1.11802	-0.196259	0.969471	0.860654	-0.175542	122	87	1.25602	-1.5518		0.21665	-1.23549	134	159	1.2727	-2.15773		0.090001	-1.69539	301	335	1.15383	-1.51681		0.188649
CNAG_00027	1	13	0.807987	1.5242	0.759273	0.0592384	1.88642	72	108	11.2209	0.88927	0.82103	0.727434	0.355871	0.923262	10	5	2.18377	-3.66278		0.0934897	-1.67727	12	7	1.72342	-0.553215		0.748212	-0.320997	63	48	1.89989	-2.17334		0.252652	-1.14393	38	21	1.712	-0.735564		0.667448	-0.429652	43	25	1.72602	-1.40337		0.41618
CNAG_00028	0	1	3.10346	0.734319		0.812957	0.236613	4	5	0.523216	3.28874	1.13973		0.728926	0.346555	2	0	2.34475	0.528967		0.821516	0.225596	2	0	1.96783	2.52614		0.199242	1.28371	0	4	2.08841	0.977971		0.639581	0.468284	6	4	2.34786	-1.00903		0.667364	-0.429768	15	6	1.96291	1.84559		0.3471
CNAG_00029	0	0	2.82988	2.73415	0.999845	0.333957	0.966174	4	11	0.979608	2.91589	3.5742		0.220287	1.22577	1	2	1.6857	1.48262		0.379116	0.879527	0	2	1.72237	-0.0296352		0.986272	-0.017206	5	9	2.02776	-1.51927		0.453716	-0.749234	4	4	1.71981	-0.420958		0.806635	-0.24477	4	5	1.57038	1.07164		0.494983
CNAG_00030	3	0	2.14712	0.380518	0.999845	0.859334	0.177222	15	26	2.84138	2.2468	0.143167		0.949193	0.0637206	6	0	2.64883	4.94106		0.0621291	1.86537	3	0	2.80151	1.70905		0.54183	0.610048	6	14	2.93846	0.823296		0.77934	0.280179	9	16	2.70932	2.18846		0.419234	0.807751	17	16	2.94585	-0.0589558		0.984033
CNAG_00031	3	9	1.05103	-0.191087	0.999845	0.855732	-0.18181	19	36	4.49923	1.16423	-0.133857	0.975601	0.908465	-0.114974	3	4	0.981062	1.1495	0.458867	0.24132	1.17169	5	8	0.866965	2.00766	0.16098	0.0205729	2.31573	14	13	0.896514	1.25991	0.443117	0.15992	1.40534	19	9	0.877093	1.26243	0.352535	0.150057	1.43933	41	22	0.875773	0.897842	0.666748	0.305269
CNAG_00032	3	3	1.19082	0.540675	0.999845	0.649803	0.454035	19	37	4.95084	1.30166	0.457828	0.924965	0.725044	0.351725	7	1	1.72433	-3.44656		0.0456325	-1.99878	5	4	1.00292	0.973278	0.755071	0.331823	0.970449	20	17	1.40788	-2.22629		0.113806	-1.58131	9	7	1.3902	-2.64496		0.0570955	-1.90258	28	24	1.02491	-0.314668	0.925098	0.758828
CNAG_00033	0	0	4.99742	-2.62644		0.599194	-0.52556	0	0	0.389656	4.99758	0.349167		0.944299	0.0698673	0	0	6.75349	1.92027		0.776152	0.284338	0	0	6.76668	-0.636661		0.92504	-0.0940876	0	0	6.75494	0.797922		0.905969	0.118124	0	0	6.76668	-1.04608		0.877142	-0.154593	0	0	6.76668	-1.45049		0.830268
CNAG_00034	137	339	0.388634	-0.174625	0.999845	0.653193	-0.449331	1298	1091	209.374	0.403343	-0.973784	0.145614	0.0157662	-2.41428	149	48	2.01767	-2.44134		0.226286	-1.20998	126	35	1.51322	0.579575		0.701715	0.383007	513	478	1.64599	-0.601301		0.714879	-0.365312	771	955	1.52422	0.0229731		0.987975	0.015072	1573	1790	1.74077	-2.03524		0.24234
CNAG_00035	0	14	1.16021	0.180967	0.999845	0.87605	0.155979	20	41	5.81252	1.25059	0.299572	0.947091	0.810684	0.239544	6	3	1.24704	-0.760806		0.541803	-0.610089	7	1	0.97083	0.56043	0.891758	0.563758	0.577269	16	7	1.15446	-1.36968		0.235454	-1.18643	6	10	0.970181	0.170658		0.86037	0.175904	14	12	0.968048	-0.187219	0.952331	0.846647
CNAG_00036	0	18	1.17047	0.96674	0.999845	0.408837	0.825943	74	58	7.96052	1.30698	-0.520206	0.914197	0.690615	-0.398021	6	1	6.76629	-0.858237		0.899067	-0.12684	6	2	6.76629	-2.07597		0.758987	-0.306811	38	28	6.75454	-0.641388		0.924349	-0.0949566	40	33	6.76629	-2.48539		0.71338	-0.36732	67	70	6.75741	-1.51897		0.822145
CNAG_00038	3	17	1.08297	-0.178348	0.999845	0.869193	-0.164684	36	46	5.88595	1.27423	-1.4331	0.640574	0.260725	-1.12468	1	3	4.04398	-0.858668		0.831848	-0.212332	10	8	3.9132	0.371224		0.924422	0.0948646	29	29	4.04398	-1.99139		0.622413	-0.492434	30	20	3.9132	-0.0263656		0.994624	-0.00673761	49	58	3.88448	-0.0817359		0.983212
CNAG_00039	6	12	0.754096	0.0798809	0.999845	0.915638	0.105929	67	41	11.4864	0.820614	0.399142	0.889928	0.626687	0.486395	9	8	0.799713	-1.96308	0.109673	0.0140988	-2.45474	7	4	0.738366	-0.441249	0.885313	0.550105	-0.597602	17	20	0.780667	-2.63787	0.0175429	0.000727522	-3.37899	36	34	0.737406	-0.705761	0.578181	0.338524	-0.957086	58	60	0.735851	-0.8734	0.590887	0.235257
CNAG_00040	15	55	0.457979	-0.0965546	0.999845	0.833022	-0.210827	182	150	28.6605	0.515329	-0.413163	0.773915	0.4227	-0.801746	24	12	0.928905	-0.139119	0.931845	0.880949	-0.149767	23	15	0.805215	0.68026	0.792353	0.398213	0.844818	89	45	0.836621	-0.0263842	0.987381	0.974842	-0.0315367	113	109	0.798291	0.530292	0.719237	0.506508	0.664284	163	226	0.816375	-0.461037	0.83346	0.572252
CNAG_00043	5	8	0.793451	-0.108038	0.999845	0.891693	-0.136162	33	37	9.27709	0.855522	0.73843	0.750054	0.388064	0.863134	14	4	1.28162	-0.212405		0.868368	-0.165732	12	2	1.16276	-0.650041	0.898943	0.576129	-0.559049	20	16	1.13617	-0.342254		0.763236	-0.301234	23	33	1.68611	-3.39095		0.0443149	-2.0111	61	48	1.0947	-0.804371		0.462471
CNAG_00044	17	57	0.621971	0.198594	0.999845	0.749501	0.319298	210	229	30.2536	0.660802	-0.300447	0.897037	0.649347	-0.45467	42	6	0.851942	0.0426791	0.974114	0.960046	0.0500963	35	17	0.716318	1.04947	0.538667	0.142898	1.46509	108	72	0.738981	0.497099	0.767131	0.50115	0.672682	126	121	0.744619	-0.126643	0.937009	0.864949	-0.170077	276	321	0.722566	0.0348241	0.994948	0.961561
CNAG_00045	5	13	0.744879	0.11191	0.999845	0.880576	0.150239	41	63	10.8493	0.915672	-0.860808	0.720201	0.347175	-0.940083	4	3	1.67401	3.60413		0.0313192	2.15299	6	8	1.67623	2.34657	0.569733	0.16154	1.39991	21	27	1.70417	1.98182		0.244861	1.16292	24	24	1.63161	3.13251		0.0548711	1.9199	44	30	1.64634	2.22023	0.519658	0.177471
CNAG_00046	28	49	0.530164	-0.249101	0.999845	0.638457	-0.469857	198	196	34.1945	0.582674	-0.834756	0.498648	0.151964	-1.43263	25	11	0.712809	-0.919015	0.408626	0.197299	-1.28929	18	10	0.580371	0.62362	0.718105	0.28259	1.07452	116	79	0.63886	-1.04639	0.358547	0.101444	-1.63789	133	151	0.580312	0.227414	0.849798	0.695146	0.391882	291	295	0.571813	0.394067	0.797049	0.490727
CNAG_00047	4	11	0.864523	0.219326	0.999845	0.799731	0.253696	45	48	5.85297	1.01217	-0.551492	0.874219	0.585848	-0.544862	7	1	0.748859	0.0835453	0.947406	0.91117	0.111563	7	2	0.66025	0.365359	0.900748	0.580014	0.553364	19	21	0.677527	0.0377852	0.98013	0.955526	0.0557693	27	21	0.654286	0.134319	0.930937	0.837345	0.205291	35	25	0.638412	0.318047	0.855142	0.618354
CNAG_00048	6	6	1.04896	0.313645	0.999845	0.764935	0.299007	37	64	9.41085	1.10666	0.519552	0.896185	0.638727	0.469479	4	9	1.00496	0.951588		0.343692	0.946895	2	6	0.941354	0.638747	0.852832	0.497429	0.678541	45	31	1.05302	-0.639212		0.543832	-0.607028	14	6	1.00909	-0.716481		0.477687	-0.710028	9	3	0.925595	0.160058	0.958512	0.862711
CNAG_00049	0	4	1.36361	1.00258	0.999845	0.462193	0.73524	19	16	3.24205	1.48305	1.24691		0.400475	0.840772	2	3	0.946643	-0.602184	0.696405	0.524695	-0.636126	3	2	0.849441	-0.511148	0.883803	0.547343	-0.601746	12	3	0.824317	0.218347	0.911552	0.7911	0.264882	5	4	0.79993	0.760831	0.580541	0.341542	0.951123	6	6	0.795123	0.685103	0.733921	0.38889
CNAG_00050	4	14	0.895214	-0.643312	0.999845	0.47238	-0.718613	34	25	5.90682	1.00703	-0.46752	0.897037	0.642464	-0.464256	9	1	2.66732	0.581084		0.827544	0.217853	2	0	2.29693	3.91157		0.0885769	1.70295	11	15	2.63185	0.832175		0.751855	0.316194	19	26	2.36434	2.30945		0.328676	0.976784	23	59	2.37192	1.81334		0.444566
CNAG_00051	19	38	0.562696	-0.0979157	0.999845	0.861856	-0.174012	177	134	33.6647	0.588713	0.48274	0.767658	0.412221	0.819992	38	23	0.596473	-0.597157	0.534017	0.316756	-1.00115	20	21	0.568046	0.543781	0.755935	0.338424	0.957283	76	60	0.568381	0.588093	0.61392	0.300818	1.03468	103	91	0.564311	1.26211	0.107172	0.0253152	2.23656	180	169	0.566234	0.179644	0.922578	0.751045
CNAG_00052	5	61	0.726687	0.713367	0.999845	0.326262	0.98167	223	221	20.9449	0.800231	-0.919305	0.628313	0.250639	-1.1488	12	7	1.59378	1.02553		0.519926	0.643459	31	12	1.42078	1.50843	0.725132	0.288374	1.0617	132	122	1.43558	1.35955		0.343618	0.947041	147	107	1.42688	0.999424		0.48366	0.700427	275	270	1.38916	1.38351	0.67737	0.319283
CNAG_00053	2	2	1.32886	-0.0623172	0.999845	0.962597	-0.0468953	14	10	3.87293	1.39563	1.32055	0.718429	0.344045	0.946203	2	5	2.10801	-2.44854		0.245422	-1.16154	2	1	1.69785	-0.221983		0.895978	-0.130744	3	0	1.77439	-0.732685		0.679663	-0.412923	6	6	1.58041	1.32701		0.401096	0.839665	17	13	1.84473	-2.0398		0.268837
CNAG_00054	0	8	1.57994	1.12217	0.999845	0.477543	0.71026	41	26	4.91751	1.82651	-0.699152	0.919981	0.701882	-0.382781	0	2	2.50498	-0.863797		0.73022	-0.344832	3	6	2.17942	1.26693		0.561028	0.581315	5	9	2.17115	1.45912		0.501552	0.67205	16	10	2.09656	2.33282		0.265843	1.11269	32	27	2.09411	2.00238		0.338974
CNAG_00055	2	9	1.17446	0.469458	0.999845	0.689361	0.399722	58	17	6.20704	1.24547	0.655312	0.877729	0.598781	0.526154	9	3	2.30119	-2.44425		0.28816	-1.06217	4	2	1.98843	-0.724992		0.715406	-0.364606	20	9	2.24081	-2.06197		0.357473	-0.920191	33	33	1.98383	-1.09372		0.581417	-0.551316	46	59	1.92465	-0.937539		0.626172
CNAG_00056	0	23	1.11526	0.784791	0.999845	0.481631	0.703683	69	77	9.46795	1.17138	0.493369	0.907076	0.673619	0.421186	15	3	0.59683	-0.254491	0.812295	0.669813	-0.426404	8	1	0.519388	0.285703	0.901599	0.582268	0.550075	31	22	0.583328	-1.18271	0.216299	0.0426082	-2.02753	25	32	0.510197	0.315266	0.746475	0.536621	0.617931	63	55	0.516158	-0.384097	0.78024	0.456788
CNAG_00057	14	177	0.638747	0.668406	0.999845	0.295362	1.04643	659	546	71.153	0.665673	-0.702866	0.671918	0.291026	-1.05587	51	16	1.63524	-1.7741		0.277957	-1.08492	33	23	0.94308	2.25832	0.137173	0.0166376	2.39462	339	244	1.03585	0.24252		0.814887	0.234126	291	332	1.12462	-1.10556		0.325582	-0.983052	866	770	1.11149	-1.40682	0.556672	0.205619
CNAG_00058	23	102	0.38458	0.381226	0.999845	0.321549	0.99128	416	379	55.7464	0.42383	-0.328256	0.783881	0.438636	-0.774499	42	23	0.972172	-1.22748		0.206726	-1.26262	34	20	0.81794	-1.05075	0.617858	0.198923	-1.28463	194	192	0.807008	-0.806979		0.317327	-0.999965	257	264	0.746919	0.0283126	0.989098	0.969763	0.0379058	534	502	0.767554	-0.96738	0.559042	0.207547
CNAG_00059	1	2	1.35025	0.505138	0.999845	0.708325	0.374106	11	12	3.82068	1.38476	2.49388	0.348055	0.0717115	1.80095	5	6	2.67867	-0.859722		0.748247	-0.320952	4	0	2.65503	-0.597496		0.821946	-0.225043	7	7	2.31413	2.4706		0.285694	1.06762	8	9	2.37718	0.868253		0.714929	0.365244	10	13	2.29413	2.18971		0.339838
CNAG_00060	7	14	0.751522	0.059356	0.999845	0.937048	0.0789811	67	58	8.48491	0.885403	-0.791511	0.738456	0.371345	-0.893956	5	4	1.86855	-1.05275		0.57316	-0.563403	9	9	1.31742	2.23808	0.425086	0.0893498	1.69884	17	28	1.43788	0.147883		0.918084	0.102848	48	30	1.42616	-0.228033		0.872965	-0.159893	88	84	1.3563	0.358824		0.791347
CNAG_00061	90	429	0.342387	0.03871	0.999845	0.909984	0.113059	1216	1314	182.85	0.358964	-0.844666	0.160032	0.0186192	-2.35307	145	50	0.812731	0.393617		0.628163	0.484314	124	55	0.760846	0.123674	0.971769	0.870875	0.162548	643	537	0.851171	-1.20636	0.439985	0.156396	-1.4173	839	926	0.793987	-0.949658	0.462806	0.231672	-1.19606	1794	1758	0.753113	-0.478709	0.808484	0.525011
CNAG_00062	26	61	0.493419	0.092906	0.999845	0.850649	0.18829	230	291	37.8837	0.545115	-0.757386	0.516408	0.164709	-1.38941	31	10	1.32856	0.534199	0.824902	0.687618	0.40209	28	7	1.30817	-0.0529324	0.991561	0.967724	-0.0404629	122	87	1.31306	-0.131211	0.969344	0.920402	-0.0999271	148	160	1.30912	-0.487623	0.861263	0.709535	-0.372481	392	372	1.29592	-0.249288	0.952331	0.847458
CNAG_00063	2	7	0.99239	0.0369956	0.999845	0.970262	0.0372793	22	25	3.86188	1.10196	0.392297	0.923761	0.721842	0.355998	5	3	1.31802	-1.68279		0.201689	-1.27675	4	0	0.920418	-0.395135	0.931903	0.667705	-0.4293	6	13	1.01452	-1.27055		0.210436	-1.25237	18	22	0.878546	-0.0966178		0.912429	-0.109975	34	38	0.866252	-0.216344	0.938916	0.802783
CNAG_00064	3	29	0.733289	0.0478955	0.999845	0.947922	0.065316	76	69	14.8029	0.817995	-0.301201	0.920932	0.71271	-0.368219	12	4	3.1128	3.04876		0.32737	0.979426	4	4	3.2757	-0.636672		0.845892	-0.194363	41	23	3.24887	0.817118		0.801421	0.251508	35	42	3.2757	-1.0461		0.749459	-0.319353	93	81	3.00502	2.45752		0.413468
CNAG_00065	43	191	0.409495	-0.0493165	0.999845	0.90414	-0.120433	580	516	84.1326	0.434635	-0.625998	0.496174	0.149787	-1.44028	75	28	1.51879	0.4272		0.778498	0.281277	49	20	1.29297	1.79431	0.575789	0.165214	1.38775	236	194	1.35045	0.759562		0.57381	0.56245	321	344	1.33261	0.533906		0.688681	0.400646	791	759	1.28956	1.09054	0.74154	0.397738
CNAG_00066	12	67	0.482867	0.0371825	0.999845	0.938621	0.0770036	184	196	27.0157	0.531049	-0.271356	0.882536	0.609365	-0.510981	29	13	0.568981	-1.8483	0.0303207	0.0011604	-3.24844	29	11	0.51979	-0.279755	0.905623	0.590434	-0.538207	94	81	0.516726	0.460649	0.665896	0.372674	0.891477	110	110	0.513484	1.18168	0.0962205	0.0213749	2.3013	151	188	0.513774	0.612045	0.589879	0.233546
CNAG_00067	13	35	0.565161	-0.0304142	0.999845	0.957083	-0.053815	107	146	32.6598	0.642858	-0.680097	0.671664	0.290089	-1.05793	12	9	3.0699	0.73263		0.811377	0.23865	22	7	2.94179	0.464294		0.874593	0.157827	77	62	3.12503	-1.9987		0.522447	-0.639578	72	50	3.08521	-0.942373		0.760024	-0.305449	111	90	2.84012	1.00772		0.722727
CNAG_00068	4	13	0.924511	-0.128719	0.999845	0.889269	-0.139229	22	58	7.09199	1.02304	-0.20744	0.955566	0.839317	-0.202768	6	4	1.76644	-3.85674		0.0290105	-2.18334	6	3	1.10874	-0.17868	0.972231	0.871971	-0.161156	19	9	1.46459	-2.65288		0.0700873	-1.81135	12	15	1.32207	-2.49437		0.059199	-1.88671	33	39	1.13337	-1.35765		0.230962
CNAG_00069	0	0	3.59025	1.8162	0.999845	0.612948	0.505869	4	4	0.960349	3.83554	0.349169		0.927465	0.0910351	0	0	1.53639	1.71725		0.263686	1.11772	0	0	1.49458	0.95211	0.870137	0.524099	0.63704	4	1	1.48803	1.12489		0.449673	0.75596	2	0	1.41711	2.07105	0.345607	0.143889	1.46146	5	5	1.39877	2.4685	0.346958	0.0776043
CNAG_00070	2	9	0.769354	0.0655826	0.999845	0.932068	0.0852437	26	31	9.53511	0.806648	1.68245	0.241541	0.0370029	2.08573	14	9	1.07884	0.451695		0.675446	0.418685	7	2	0.998267	0.286662	0.94877	0.77399	0.287159	11	17	1.0892	-0.777967		0.475071	-0.714253	18	25	1.05784	-0.956731		0.365772	-0.904422	51	34	0.973399	0.01999	0.99709	0.983616
CNAG_00072	14	84	0.63268	0.274849	0.999845	0.663983	0.434421	295	245	37.4757	0.660638	-0.061241	0.983157	0.926142	-0.0926998	48	14	0.841194	0.0271675		0.974236	0.0322963	21	21	0.801999	-0.678096	0.792353	0.397828	-0.845507	135	115	0.859767	-1.30238		0.129822	-1.51481	148	143	0.784042	-0.78751	0.553681	0.315175	-1.00442	354	371	0.741692	-0.132471	0.956402	0.858247
CNAG_00073	15	73	0.424155	0.137368	0.999845	0.746042	0.323863	236	230	39.07	0.459208	0.158484	0.926694	0.73	0.345125	48	18	0.875294	1.3031		0.136552	1.48875	24	16	0.805422	1.29999	0.465681	0.106518	1.61404	114	102	0.911674	-0.222752	0.914273	0.806973	-0.244333	144	157	0.846891	0.0733718	0.970771	0.93096	0.0866367	313	314	0.801386	0.595031	0.78024	0.457783
CNAG_00074	22	134	0.44028	0.465478	0.999845	0.290406	1.05723	542	442	54.4638	0.481753	-0.775131	0.423875	0.10762	-1.60898	37	19	0.714487	0.359429	0.769592	0.614923	0.503058	40	18	0.689707	-0.474028	0.85053	0.4919	-0.687289	214	218	0.73179	-0.995842	0.46754	0.173567	-1.36083	210	251	0.648014	0.0665658	0.966071	0.918183	0.102723	602	612	0.665873	-0.814817	0.576009	0.221072
CNAG_00075	11	56	0.462193	0.278955	0.999845	0.546145	0.603546	182	207	31.2808	0.522894	-0.341009	0.833164	0.5143	-0.652157	25	10	0.9057	2.40945	0.0793433	0.0078068	2.66031	29	13	0.924447	0.816987	0.782603	0.376827	0.883757	107	79	0.95277	0.462241	0.850966	0.627566	0.485155	105	106	0.957693	-0.0949584	0.966921	0.921017	-0.0991533	295	232	0.866775	1.66038	0.286193	0.0554178
CNAG_00076	7	69	0.548966	0.811364	0.999845	0.139412	1.47799	287	286	50.935	0.609917	-0.540928	0.742168	0.375139	-0.886888	22	9	2.46089	1.96428		0.424756	0.798197	43	7	2.09412	4.23718		0.0430355	2.02337	130	90	2.10238	4.1042		0.0509182	1.95217	185	47	2.19424	2.14309		0.328722	0.97669	89	67	2.09368	3.44725		0.0996603
CNAG_00077	23	43	0.550287	0.0861992	0.999845	0.875525	0.156644	232	186	36.9101	0.580855	0.12651	0.951904	0.827585	0.2178	48	14	1.08301	0.46094		0.670393	0.425609	32	21	0.892864	1.9396	0.210649	0.02983	2.17234	76	66	1.00218	0.0262073		0.979137	0.0261503	92	128	1.07509	-1.09765	0.5451	0.307264	-1.02098	191	218	0.949021	-0.186892	0.952118	0.843881
CNAG_00078	5	17	0.607452	0.620046	0.999845	0.307381	1.02073	90	83	14.4075	0.673377	0.60434	0.73752	0.369465	0.897477	18	6	2.21747	0.606609		0.784424	0.273558	13	1	1.83701	2.36447		0.198048	1.28713	41	37	1.88186	1.73624		0.356206	0.922619	41	64	1.95611	0.496726		0.799545	0.253936	106	100	1.86711	1.03727		0.578521
CNAG_00079	2	27	1.04111	0.23773	0.999845	0.81938	0.228342	83	57	10.6095	1.08417	0.439835	0.911634	0.684971	0.40569	24	2	5.53488	0.581077		0.916388	0.104985	12	6	5.53488	-0.636666		0.908423	-0.115028	30	19	5.44006	1.92316		0.723699	0.353519	46	58	5.40462	2.08305		0.699925	0.385421	74	102	5.45771	0.765077		0.888516
CNAG_00080	28	23	1.09061	-1.33503	0.999845	0.220907	-1.22412	71	86	22.5221	1.15842	-1.95236	0.395311	0.091919	-1.68536	5	7	2.97705	-0.865522		0.771257	-0.290731	13	3	2.65472	2.33274		0.379556	0.878714	46	29	2.94665	-0.623547		0.83241	-0.211612	8	12	2.97705	-2.49271		0.40242	-0.837308	36	34	2.77639	-0.278015		0.920237
CNAG_00081	13	63	0.547706	-0.0812281	0.999845	0.882101	-0.148306	180	164	36.7778	0.573993	0.39608	0.819609	0.490167	0.690043	28	30	0.723872	-1.19512	0.287588	0.0987351	-1.65102	35	25	0.514223	0.83185	0.463786	0.105731	1.61768	71	59	0.529488	0.329745	0.792911	0.53344	0.622763	125	104	0.498927	1.41762	0.0290296	0.0044926	2.84133	191	202	0.497557	1.14183	0.147663	0.0217401
CNAG_00082	6	11	0.887785	-0.321283	0.999845	0.717432	-0.361893	48	32	6.74925	1.19593	-2.05953	0.380281	0.0850493	-1.72211	1	2	1.32693	-1.31296	0.539182	0.322432	-0.989472	5	3	0.853551	1.95005	0.171561	0.0223344	2.28463	17	14	1.10966	-1.46104	0.485066	0.187952	-1.31666	21	21	1.30023	-2.82602	0.120122	0.029744	-2.17348	46	43	0.900312	-0.269346	0.927311	0.76481
CNAG_00083	15	24	0.640371	-0.425794	0.999845	0.506103	-0.664918	92	86	23.0928	0.670124	0.487238	0.806128	0.467174	0.727086	25	18	1.3804	0.0344348		0.980098	0.0249455	26	6	1.11826	1.80974	0.463786	0.105586	1.61835	40	28	1.13508	1.42561		0.209134	1.25595	54	53	1.29422	-1.04984		0.417264	-0.811178	84	95	1.13585	0.501163	0.87443	0.659052
CNAG_00084	20	84	0.653407	0.137691	0.999845	0.8331	0.210727	317	245	43.5708	0.68115	-0.279053	0.910678	0.682041	-0.409679	45	15	0.954352	-1.28759	0.38457	0.177282	-1.34917	33	28	0.743634	-0.867247	0.674855	0.243522	-1.16623	145	132	0.662641	0.755435	0.561619	0.254271	1.14004	187	216	0.642713	1.06957	0.264998	0.0960827	1.66415	379	392	0.643904	0.601124	0.704121	0.350531
CNAG_00085	1	7	0.90906	0.869871	0.999845	0.338622	0.956891	40	30	6.78375	1.03355	0.650249	0.841888	0.529259	0.629138	5	3	2.05941	3.29868		0.109209	1.60176	1	2	2.43195	-0.658697		0.786505	-0.270851	12	7	2.2534	0.288236		0.898219	0.127911	21	26	2.11461	0.873828		0.679436	0.413233	42	49	2.11421	0.473298		0.822862
CNAG_00086	9	31	0.512104	-0.182963	0.999845	0.720884	-0.357277	85	95	21.0382	0.554686	0.514055	0.725654	0.354057	0.926749	25	14	2.16435	-1.85696		0.390906	-0.857975	21	1	1.82593	-0.122151		0.946663	-0.0668977	40	48	1.76732	0.460564		0.794401	0.2606	55	54	1.69211	0.970409		0.566313	0.57349	96	124	1.67503	0.927187		0.579896
CNAG_00087	7	37	0.618817	0.187543	0.999845	0.761839	0.303067	130	108	16.4404	0.672955	0.0274054	0.992866	0.967516	0.040724	25	6	2.05483	0.396146		0.847125	0.192788	12	2	1.84581	0.880383		0.633388	0.476964	61	45	2.20397	-1.4943		0.497769	-0.678005	65	70	1.93948	-0.508789		0.793065	-0.262333	162	148	1.85418	-0.0451727		0.980563
CNAG_00088	13	72	0.540157	0.050355	0.999845	0.925726	0.0932229	228	183	25.1099	0.612741	-1.08606	0.357791	0.0763175	-1.77246	19	7	2.99902	0.581084		0.846365	0.193758	18	11	2.67157	4.0244		0.13197	1.50638	79	80	2.94858	1.01518		0.730625	0.344294	119	129	2.66496	3.87611		0.145815	1.45447	250	324	2.70138	2.44343		0.365722
CNAG_00089	6	10	1.15675	-0.426422	0.999845	0.712399	-0.368637	27	46	6.37382	1.25918	-0.696141	0.872168	0.580363	-0.552854	10	0	4.8809	-0.86922		0.858656	-0.178086	3	3	4.8809	-2.08697		0.668958	-0.427578	13	9	4.8809	-2.00194		0.68169	-0.410158	19	19	4.75118	0.289501		0.951413	0.0609325	31	24	4.86824	-1.52587		0.753952
CNAG_00090	8	11	0.854101	-0.0727615	0.999845	0.93211	-0.0851907	59	55	8.41698	0.955934	-0.549692	0.862328	0.56527	-0.575031	10	2	2.90163	-0.506264		0.861492	-0.174476	10	1	2.66532	0.237222		0.92908	0.0890029	22	24	2.75282	-0.542418		0.843796	-0.197041	32	31	2.67241	-0.254833		0.924031	-0.095357	67	69	2.62728	0.0685113		0.979196
CNAG_00091	39	503	0.679018	0.854091	0.999845	0.208452	1.25783	2022	1777	181.393	0.692955	-1.25375	0.344011	0.0704086	-1.80927	102	28	2.04287	-2.452		0.230033	-1.20027	76	47	1.49989	1.49943	0.751758	0.317459	0.999692	968	927	1.74379	-1.01447		0.560726	-0.581763	688	848	1.62485	-0.708755		0.662693	-0.436199	2780	2111	1.53494	-0.0528194		0.972549
CNAG_00092	11	24	0.707993	-0.241703	0.999845	0.732809	-0.341392	99	70	14.1289	0.801965	-0.893871	0.645847	0.265022	-1.1146	14	2	0.691933	2.35118	0.0217501	0.000678841	3.39799	6	2	0.704663	0.4264	0.881488	0.545105	0.605111	27	24	0.697345	0.883279	0.506635	0.205287	1.26663	66	51	0.686838	1.09772	0.288895	0.109992	1.59823	99	116	0.686139	0.75398	0.628789	0.271823
CNAG_00093	13	242	0.725637	0.761041	0.999845	0.294275	1.04879	829	787	92.4734	0.734614	0.340504	0.897037	0.642995	0.463515	105	56	0.991568	0.598571		0.546069	0.603661	56	15	1.02921	-0.896569	0.787184	0.383686	-0.871126	397	330	0.939888	-0.0193081		0.98361	-0.020543	323	409	0.893156	0.137582		0.877578	0.15404	981	886	0.855	0.56844	0.799581	0.506152
CNAG_00094	1	22	1.13577	1.30261	0.999845	0.251424	1.1469	75	147	16.9563	1.17205	1.02878	0.745181	0.380072	0.877763	4	15	0.809744	-0.729857	0.571582	0.367406	-0.901343	16	11	0.683618	0.452002	0.861479	0.50849	0.66119	107	83	0.671618	1.21567	0.292733	0.0702871	1.81006	33	16	0.665488	1.20757	0.212835	0.069591	1.81456	36	37	0.658275	1.73618	0.0698432	0.00835254
CNAG_00095	8	14	0.717057	-0.615432	0.999845	0.390741	-0.858275	40	44	10.7079	0.796342	-0.173491	0.951904	0.827539	-0.21786	9	6	0.744237	-0.802771	0.500479	0.280743	-1.07865	8	0	0.63403	1.64376	0.0867092	0.00952653	2.59256	28	15	0.717387	-1.53836	0.183414	0.0320012	-2.1444	42	31	0.682396	-1.31698	0.181698	0.0536152	-1.92993	48	53	0.652758	-0.670654	0.665476	0.304224
CNAG_00096	1	4	1.09994	0.560216	0.999845	0.610533	0.509313	19	18	4.03926	1.17981	1.46953	0.581243	0.212924	1.24556	8	2	1.50083	-0.0298936		0.984109	-0.0199181	2	0	1.17357	1.43586	0.649699	0.221139	1.22351	12	3	1.18083	1.3839		0.241208	1.17197	9	10	1.18596	0.793479		0.503455	0.669063	24	23	1.15694	1.01263	0.729256	0.381432
CNAG_00097	2	3	1.25351	-0.171262	0.999845	0.891326	-0.136626	13	13	3.64325	1.34906	0.789003	0.85722	0.558645	0.584856	5	2	1.87955	-0.457811		0.80756	-0.243575	1	0	1.37187	1.78361	0.611826	0.193555	1.30013	22	11	1.55963	-0.0845611		0.956761	-0.0542185	18	12	1.39554	0.956491		0.493097	0.685391	6	6	1.35786	1.29108		0.341694
CNAG_00098	8	23	0.616453	-0.0653691	0.999845	0.91555	-0.106041	88	69	14.3076	0.71218	-0.491855	0.819609	0.489796	-0.690634	8	7	0.693256	-0.0734776	0.949704	0.915591	-0.105989	16	1	0.631424	1.352	0.222556	0.0322581	2.1412	37	38	0.649466	0.139466	0.923622	0.82997	0.21474	49	53	0.684424	-1.51278	0.112664	0.0270845	-2.2103	92	90	0.63768	-0.0474372	0.989954	0.9407
CNAG_00099	9	11	0.777266	-0.220245	0.999845	0.776902	-0.283359	52	58	11.2064	0.890381	-0.694338	0.783101	0.435496	-0.779822	8	3	1.16265	-1.4751		0.204533	-1.26874	5	3	0.903533	-0.636664	0.844886	0.481035	-0.704638	14	29	1.03251	-1.85023		0.0731366	-1.79198	38	48	1.08536	-2.68172		0.0134811	-2.4708	60	94	0.862882	-0.672089	0.771142	0.436045
CNAG_00100	37	159	0.479848	0.127984	0.999845	0.789686	0.266718	521	523	70.8149	0.510567	-0.867724	0.38899	0.0892191	-1.69953	64	14	2.39324	1.3823		0.563544	0.577585	37	17	2.20865	1.95391		0.376338	0.884663	278	206	2.51778	-0.479364		0.849002	-0.190392	318	386	2.38313	-0.185298		0.938023	-0.0777544	790	790	2.17576	1.92638		0.375952
CNAG_00101	10	14	0.724022	-0.21471	0.999845	0.766808	-0.296552	71	58	15.2754	0.770672	0.39157	0.883899	0.611391	0.508088	14	11	3.2732	-0.85907		0.79297	-0.262456	13	3	3.05704	0.915903		0.764479	0.299604	26	20	3.24636	-0.623009		0.847812	-0.19191	47	32	3.11017	-0.0312582		0.991981	-0.0100503	89	74	3.1341	-0.63159		0.840291
CNAG_00104	56	152	0.436823	-0.263495	0.999845	0.54637	-0.603208	501	449	83.9666	0.456712	-0.413177	0.736368	0.365637	-0.904675	98	27	1.28907	-1.67417		0.194032	-1.29874	49	22	0.808596	1.06633	0.603797	0.187256	1.31874	217	212	0.869494	-0.134821		0.876776	-0.155057	305	299	0.822019	0.274767	0.878319	0.738185	0.334258	603	617	0.869494	-1.0338	0.590292	0.234454
CNAG_00105	1	0	2.46776	0.32935	0.999845	0.893829	0.133461	5	5	1.1418	2.74035	0.176966		0.94851	0.0645781	0	1	1.06193	-0.0336139		0.974748	-0.0316535	1	0	0.858881	1.67017	0.304804	0.0518249	1.94459	2	0	1.1016	-1.41634	0.501085	0.198541	-1.28572	6	3	1.17474	-2.2965	0.174627	0.0505959	-1.95489	6	3	0.90769	-0.4238	0.86487	0.640572
CNAG_00106	27	88	0.485223	-0.611515	0.999845	0.207569	-1.26028	230	163	47.9365	0.503636	0.2784	0.872168	0.580414	0.552781	52	40	1.16996	1.73173		0.138829	1.48017	17	15	1.09887	1.5872	0.549086	0.148626	1.4444	83	99	1.16934	0.608466		0.60282	0.520349	142	186	1.10888	0.977744		0.377919	0.881737	280	265	1.11123	0.529502	0.86148	0.633719
CNAG_00107	17	49	0.478435	0.133744	0.999845	0.779828	0.279544	195	190	27.6773	0.523322	-0.0816273	0.968452	0.876049	-0.155979	33	13	0.724556	-0.0667269	0.956035	0.926624	-0.0920936	23	8	0.66314	-0.474581	0.839137	0.474203	-0.715657	93	84	0.65219	-0.198985	0.904545	0.760288	-0.305102	77	107	0.612845	0.282979	0.813039	0.644263	0.461746	206	227	0.611057	-0.0597597	0.982266	0.922093
CNAG_00108	14	69	0.483596	0.163845	0.999845	0.734757	0.338805	260	186	32.1267	0.537674	-0.515671	0.715102	0.33752	-0.959077	29	10	1.76198	1.09928		0.5327	0.62389	9	9	1.84977	-0.642427		0.728365	-0.347302	90	76	1.69384	0.542328		0.748834	0.320177	119	136	1.59048	1.77214		0.265185	1.11422	244	237	1.62927	0.481774		0.76746
CNAG_00109	7	11	0.705651	0.129298	0.999845	0.854616	0.183232	62	54	12.0972	0.762199	0.64105	0.761145	0.400318	0.841054	14	8	1.20493	-0.52172		0.665023	-0.432989	12	0	1.00632	-0.389793	0.938238	0.698501	-0.387345	27	30	0.901781	1.36186		0.130996	1.51019	35	34	0.882277	1.54277	0.234228	0.0803569	1.74862	64	52	0.882104	1.14465	0.540835	0.194411
CNAG_00110	3	4	1.04719	0.871102	0.999845	0.405494	0.83185	46	31	4.71081	1.26088	-0.431036	0.926694	0.732462	-0.341853	2	2	0.954763	0.280416		0.768986	0.293702	4	0	0.840343	0.582009	0.849669	0.48857	0.692585	10	16	1.05572	-1.57005		0.136965	-1.48719	16	27	0.869164	-0.354442	0.841457	0.683423	-0.407796	35	41	0.841437	-0.25269	0.927311	0.763943
CNAG_00111	18	41	0.540037	0.0372613	0.999845	0.944991	0.0689977	174	167	26.546	0.614218	-0.882539	0.497583	0.150761	-1.43685	21	5	1.73173	-1.7228		0.319813	-0.994843	10	8	1.20736	0.00320255	0.999286	0.997884	0.00265252	49	79	1.39343	-1.4137		0.310321	-1.01455	82	86	1.35636	-1.69186		0.212268	-1.24735	201	214	1.14937	0.227653	0.951573	0.842993
CNAG_00115	28	183	0.590015	0.202554	0.999845	0.73137	0.343303	585	491	62.0364	0.634146	-1.62592	0.109531	0.0103489	-2.56395	37	8	1.38724	-0.594102		0.66846	-0.428263	34	10	1.52571	-2.48644	0.460667	0.103165	-1.6297	295	250	1.25317	-0.626565		0.617085	-0.499985	304	290	1.30219	-1.60968		0.216408	-1.23613	755	745	1.25513	-1.5513		0.21647
CNAG_00116	124	380	0.325904	-0.126309	0.999845	0.698338	-0.387564	1285	1170	201.823	0.33965	-0.644549	0.312004	0.0577378	-1.89768	182	62	0.720043	0.598581	0.603567	0.405797	0.831313	141	69	0.673922	0.383421	0.893226	0.569397	0.56894	526	439	0.671256	0.562704	0.689208	0.401871	0.838285	798	922	0.640187	1.67866	0.0490167	0.0087379	2.62214	1673	1824	0.643169	1.01797	0.420655	0.113481
CNAG_00117	16	45	0.455786	0.320444	0.999845	0.48202	0.703058	221	185	33.9183	0.516597	-0.33899	0.83135	0.511697	-0.656198	21	13	0.953308	1.95876		0.0399079	2.0547	26	9	0.929009	1.33237	0.553515	0.15152	1.43418	89	104	1.61874	-3.13585		0.0527193	-1.93721	133	103	1.00697	-0.514336	0.796082	0.60951	-0.510773	262	298	0.930868	0.469	0.854891	0.61438
CNAG_00118	0	4	1.41474	0.205205	0.999845	0.884673	0.145048	11	9	2.90299	1.51536	1.26275		0.404674	0.833302	2	3	2.15888	-3.18198		0.140507	-1.47391	1	0	1.73978	-0.736414		0.672092	-0.423279	6	0	1.72694	-0.485762		0.778492	-0.281284	2	8	1.67153	-0.0727677		0.965276	-0.0435337	18	16	1.63997	0.487014		0.766493
CNAG_00119	2	1	1.65404	-0.876002	0.999845	0.596381	-0.529613	7	5	1.98825	1.89807	-0.485021		0.798311	-0.255533	1	1	1.29337	1.7197		0.183642	1.32962	0	2	1.44008	-0.686153	0.917987	0.633739	-0.47647	6	1	1.29258	0.596252		0.644592	0.461288	3	11	1.24785	0.757058		0.544058	0.606689	11	9	1.22499	0.836138	0.797103	0.494879
CNAG_00120	5	15	0.817588	-0.812998	0.999845	0.320035	-0.994386	35	25	8.12786	0.881804	0.140534	0.968387	0.873377	0.159371	14	3	4.25858	0.918703		0.829198	0.21573	5	7	4.28138	-0.631281		0.882778	-0.147448	15	17	4.26071	-0.253005		0.952649	-0.059381	22	18	4.36908	-1.86631		0.66926	-0.427164	26	37	4.37062	-2.28063		0.601804
CNAG_00121	21	144	0.476134	0.432184	0.999845	0.364041	0.907693	526	464	73.6534	0.491693	0.4492	0.733469	0.360939	0.913578	107	36	3.77872	-1.86162		0.622253	-0.492659	88	33	3.5662	0.369109		0.917564	0.103502	278	235	3.67065	-0.822364		0.822728	-0.224038	306	220	3.7427	-1.89009		0.613553	-0.505008	608	612	3.76182	-2.51322		0.504078
CNAG_00122	12	24	0.595431	-0.410063	0.999845	0.491023	-0.688683	73	82	16.5191	0.641423	0.207588	0.931526	0.746213	0.323637	21	11	0.994883	-0.939996	0.55063	0.344745	-0.94483	11	2	0.706961	1.47781	0.242577	0.0365849	2.09037	34	29	0.832823	-0.887241	0.598175	0.286721	-1.06534	50	57	0.756795	-0.345126	0.817015	0.648364	-0.456036	93	75	0.71864	0.204861	0.930363	0.775592
CNAG_00123	0	2	1.52287	2.67595	0.916589	0.0788879	1.75718	31	29	4.1584	1.56859	3.36021	0.221436	0.0321782	2.14219	4	7	2.07889	3.54526		0.0881269	1.70536	6	3	2.00446	3.11156		0.120587	1.55231	17	6	2.02061	2.99608		0.138138	1.48276	11	8	1.95377	3.64523		0.0620781	1.86574	8	24	1.96594	2.95602		0.13268
CNAG_00124	4	9	0.827231	-0.451099	0.999845	0.585539	-0.545312	24	28	10.3848	0.901775	0.461119	0.882341	0.609109	0.511346	11	3	0.767901	-0.733121	0.546155	0.339726	-0.954707	4	4	0.627297	1.07524	0.416631	0.0865142	1.71408	22	12	0.77978	-1.97858	0.0953422	0.0111695	-2.53735	12	16	0.693777	-1.39287	0.158404	0.044679	-2.00766	19	18	0.662905	-1.14403	0.362562	0.0843856
CNAG_00125	1	3	1.44038	1.40885	0.999845	0.328022	0.978107	17	38	7.82395	1.47052	2.71561	0.329306	0.064791	1.8467	7	9	1.73138	-3.18271		0.0660263	-1.83825	1	2	1.1008	-0.141735	0.98017	0.89755	-0.128757	18	18	1.19861	-0.88607		0.459756	-0.739248	6	7	1.06436	-0.100651		0.924661	-0.0945647	16	5	1.0257	0.173346	0.959355	0.865795
CNAG_00126	4	19	0.756503	-0.0826713	0.999845	0.91298	-0.109281	41	64	7.97161	0.859103	-0.331039	0.918606	0.699992	-0.385331	8	4	1.83731	-1.96243		0.285476	-1.0681	10	4	1.38974	-0.658247	0.918065	0.635752	-0.473647	24	27	1.48336	-1.39033		0.348612	-0.937285	33	32	1.35857	-0.660929		0.626622	-0.486488	78	85	1.37091	-1.23781		0.366575
CNAG_00127	2	5	0.96805	0.760635	0.999845	0.432021	0.785739	33	30	7.99393	1.04041	1.32672	0.565595	0.202241	1.27519	4	7	1.07057	2.07114		0.0530365	1.93462	11	1	1.04366	1.37792	0.602922	0.186744	1.32027	22	13	1.11095	0.370713		0.738614	0.33369	19	7	1.04878	0.857023	0.649469	0.413834	0.817164	42	31	1.00968	1.69656	0.381627	0.0928998
CNAG_00128	1494	11031	0.913848	-6.23415	6.85119e-10	8.98697e-12	-6.82186	611	104	8175.24	0.912275	2.18322	0.150805	0.0167042	2.39315	10160	16385	0.907168	0.842266	0.559599	0.353171	0.928456	12396	7610	0.907712	-7.28813	8.13705e-14	9.81769e-16	-8.02912	88	131	0.907171	-0.922837	0.616511	0.309025	-1.01727	13037	7879	0.907223	-4.47827	1.4035e-05	7.96462e-07	-4.93623	1305	264	0.90769	-8.02994	5.62833e-17	9.02535e-19
CNAG_00129	2	11	0.801922	0.716873	0.999845	0.371352	0.893944	50	53	7.59591	0.883677	0.738516	0.762135	0.403307	0.83573	9	5	0.9545	1.48276		0.120318	1.55344	4	3	0.916848	0.82951	0.774725	0.365603	0.904741	19	27	1.01461	-0.273123		0.787783	-0.269191	25	18	0.90169	0.713127	0.661755	0.429015	0.790878	35	27	0.868887	1.23568	0.492337	0.154984
CNAG_00130	25	283	0.600615	0.5496	0.999845	0.360159	0.915062	995	808	101.847	0.613877	-0.295747	0.892007	0.62997	-0.481769	98	41	1.17076	-0.741317		0.526609	-0.633191	95	53	0.880455	0.51802	0.889075	0.556294	0.588355	509	432	0.881315	0.590457		0.502875	0.669974	398	417	0.882265	0.0764035	0.970771	0.93099	0.0865993	1087	1074	0.868113	-0.0384437	0.99546	0.964678
CNAG_00131	1	7	1.25858	-0.16725	0.999845	0.894282	-0.132888	20	13	3.15973	1.35745	0.489521		0.718385	0.360618	2	4	1.46874	1.86708		0.203652	1.27122	2	2	1.35382	2.72514	0.274631	0.0441223	2.01293	6	11	1.43706	1.0912		0.447656	0.759329	7	3	1.40186	1.1137		0.426937	0.794445	11	9	1.44501	0.0957148		0.947188
CNAG_00132	3	7	0.855919	0.0287182	0.999845	0.973234	0.0335525	29	26	8.38841	0.882534	1.89797	0.21836	0.0315087	2.15059	13	12	1.20657	-2.36357		0.0501223	-1.95892	14	7	0.704793	0.129833	0.968357	0.853845	0.184214	27	19	0.784997	-1.09507		0.163016	-1.395	30	12	0.752102	-1.16571	0.307693	0.121158	-1.54993	42	28	0.74584	-1.47651	0.262028	0.047742
CNAG_00133	3	7	1.02529	-0.521178	0.999845	0.611226	-0.508324	12	26	4.68136	1.08332	0.790883	0.804409	0.465358	0.730053	9	4	0.727909	-0.321824	0.802049	0.658402	-0.442121	4	2	0.606035	0.319773	0.908369	0.597744	0.527647	6	6	0.609544	0.314879	0.835613	0.605449	0.516581	6	7	0.58251	0.76303	0.409117	0.19023	1.3099	20	23	0.580265	0.469338	0.758987	0.418611
CNAG_00134	11	16	0.761576	-0.34181	0.999845	0.653562	-0.448819	79	55	12.7166	0.826589	-0.264296	0.932349	0.749164	-0.319742	10	8	0.758793	-0.77699	0.523464	0.305844	-1.02398	8	15	0.652122	-0.204326	0.94877	0.754034	-0.313325	50	33	0.687308	-0.933376	0.46845	0.174458	-1.35802	28	39	0.638407	-0.118845	0.933485	0.85232	-0.186159	67	95	0.627005	0.0472829	0.989954	0.939888
CNAG_00135	7	8	1.07693	-1.04526	0.999845	0.331752	-0.97059	29	20	7.41965	1.27965	-1.68334	0.546985	0.188353	-1.31547	2	2	1.79295	0.706094		0.693716	0.393817	2	1	1.731	-0.123048	0.988297	0.94333	-0.0710851	8	9	1.56417	2.02172		0.196177	1.29252	23	18	1.5437	2.16555		0.160668	1.40283	45	53	1.566	1.06744		0.495469
CNAG_00136	41	203	0.492387	0.141304	0.999845	0.77413	0.286977	631	636	86.0042	0.516154	-0.784337	0.458199	0.128617	-1.51958	82	18	1.44761	2.3651		0.102301	1.6338	68	36	1.46671	0.899153	0.878825	0.53985	0.61304	354	230	1.58264	-0.0167255		0.991568	-0.0105681	335	411	1.40743	1.42605		0.310951	1.01323	829	893	1.3718	2.10108	0.439165	0.125616
CNAG_00137	22	79	0.520506	-0.361115	0.999845	0.487822	-0.693777	163	236	30.4388	0.594964	-1.45591	0.136284	0.0144025	-2.44706	13	11	0.897051	0.11057	0.942496	0.901901	0.12326	16	5	0.695357	2.38283	0.00731459	0.000610808	3.42677	165	261	0.751027	0.651435	0.67766	0.385727	0.867392	60	105	0.748632	0.205243	0.901755	0.783964	0.274157	320	208	0.738917	0.00759785	0.99709	0.991796
CNAG_00138	9	35	0.579322	-0.0626133	0.999845	0.913932	-0.10808	105	106	16.36	0.658854	-0.534775	0.770811	0.416979	-0.811674	18	4	3.59997	1.28792		0.720524	0.357758	11	8	3.51168	0.997258		0.776423	0.283983	71	54	3.7066	-1.99153		0.591064	-0.537294	61	47	3.68823	-1.10753		0.763957	-0.300288	133	146	3.58648	-0.646882		0.856865
CNAG_00139	8	90	0.619848	0.707271	0.999845	0.253854	1.14104	349	312	33.4279	0.677384	-0.905312	0.537858	0.181391	-1.33648	19	10	2.85239	-0.859478		0.763172	-0.301318	24	24	2.51963	2.19558		0.383542	0.871388	171	131	2.82016	-0.614281		0.827571	-0.217818	159	138	2.57188	0.863959		0.736927	0.335925	396	404	2.53016	1.15152		0.649024
CNAG_00140	24	76	0.388655	-0.28166	0.999845	0.468634	-0.724703	223	206	41.3717	0.436404	-0.479569	0.652051	0.271807	-1.09891	35	16	0.916372	0.367539		0.688361	0.401081	24	8	0.807542	0.914837	0.68991	0.257271	1.13287	77	91	0.919241	-0.791456		0.389245	-0.860988	136	146	0.807584	0.510307	0.737067	0.527456	0.631894	284	248	0.854263	-0.886117	0.660132	0.299601
CNAG_00141	4	12	0.901346	-0.419096	0.999845	0.641955	-0.464967	35	28	6.52952	0.960696	0.474858	0.888649	0.621104	0.494286	6	8	2.05313	-0.464843		0.820885	-0.226407	10	6	1.83336	-0.578636	0.94877	0.752294	-0.315615	9	16	1.86955	-0.683449		0.714687	-0.365568	16	10	2.10737	-3.48459		0.0982235	-1.65353	22	21	1.55631	2.62986		0.0910658
CNAG_00142	13	28	0.589462	-0.413753	0.999845	0.482731	-0.701916	80	94	19.8421	0.641542	-0.0802565	0.972549	0.900445	-0.125099	18	11	2.41951	-2.44409		0.312419	-1.01016	14	2	2.03201	0.33121		0.870522	0.162996	39	38	2.22859	-1.32754		0.551385	-0.595686	49	56	2.37221	-2.55949		0.28061	-1.07895	94	136	2.06429	-0.931225		0.651909
CNAG_00143	25	93	0.382284	0.1755	0.999845	0.646174	0.459083	340	333	47.1415	0.422176	-0.33124	0.782005	0.432687	-0.784602	48	18	1.44056	0.679648		0.637074	0.471794	27	13	1.89155	-2.64891	0.569545	0.161397	-1.40039	151	104	1.91545	-3.99159		0.0371696	-2.0839	206	205	1.39085	-0.453366		0.744453	-0.325962	370	428	1.32565	0.17906		0.892554
CNAG_00144	0	2	2.17887	0.0182369	0.999845	0.993322	0.00836987	6	3	0.974644	2.2615	1.6725		0.459571	0.739554	3	1	0.589713	-1.34963	0.138893	0.0221017	-2.28861	1	2	0.509817	-0.463081	0.772719	0.363705	-0.908329	4	2	0.494038	0.93873	0.258939	0.0574179	1.90012	0	1	0.48942	1.20749	0.0694136	0.0136178	2.46719	9	6	0.489392	0.807241	0.393678	0.0990499
CNAG_00145	5	14	0.793021	-0.287138	0.999845	0.717292	-0.362081	48	35	7.21444	0.915097	-0.527745	0.861675	0.564136	-0.57671	8	2	1.77673	1.12629		0.526138	0.633913	4	0	1.79814	-0.320216		0.858658	-0.178082	12	9	2.18156	-3.58568		0.100253	-1.64363	16	17	1.68729	1.0009		0.553047	0.593201	39	55	1.70245	0.210561		0.901568
CNAG_00146	7	13	0.73063	-0.277307	0.999845	0.704283	-0.379545	47	48	8.98647	0.884554	-0.943495	0.668263	0.286138	-1.06663	5	3	2.04452	2.88879		0.157672	1.41295	7	1	1.79607	4.39429	0.122583	0.0144204	2.44662	22	14	2.21989	0.852476		0.700966	0.384017	34	21	1.90266	2.26904		0.233042	1.19256	60	61	1.78673	3.89799		0.0291368
CNAG_00147	94	404	0.422675	0.309117	0.999845	0.464575	0.731334	1551	1450	197.938	0.43384	-0.524965	0.599547	0.226263	-1.21004	199	51	0.958203	-0.945669	0.539515	0.323682	-0.986919	131	51	0.754228	0.929874	0.647792	0.21762	1.23288	670	556	0.862509	-1.22916	0.437816	0.154128	-1.4251	885	932	0.820107	-1.15924	0.363828	0.157503	-1.41352	1852	1916	0.765869	-0.337548	0.874544	0.659402
CNAG_00148	26	185	0.521873	0.593824	0.999845	0.255175	1.13787	616	773	85.2617	0.540646	-0.203249	0.920729	0.706963	-0.375938	74	35	0.922196	-0.347926		0.705966	-0.37728	64	29	0.745591	0.990571	0.599694	0.18399	1.32857	525	431	0.848016	-0.804668	0.645337	0.342681	-0.948882	254	223	0.803159	-0.714726	0.614482	0.373523	-0.889894	668	490	0.749805	0.0411401	0.994026	0.956244
CNAG_00149	44	82	0.541059	-0.664513	0.999845	0.219383	-1.22817	261	223	59.8168	0.556822	0.05375	0.982031	0.9231	0.09653	56	44	2.10508	-1.47419		0.48374	-0.700301	63	19	1.68013	0.399264		0.812162	0.237638	142	132	2.11063	-2.59969		0.218057	-1.23171	191	222	2.15617	-4.48522		0.0375091	-2.08018	330	412	1.66115	0.00805433		0.996131
CNAG_00150	14	57	0.501951	-0.177751	0.999845	0.72325	-0.354119	144	167	30.1781	0.533283	0.292717	0.873532	0.583076	0.548896	43	17	1.13275	0.0507508		0.964264	0.0448031	20	9	1.07974	-0.691558	0.869498	0.521858	-0.640484	79	80	1.09775	-0.783289		0.475514	-0.713537	98	100	1.04499	-0.702536		0.501399	-0.67229	190	188	1.01251	-0.618161	0.817823	0.541516
CNAG_00151	12	49	0.542367	0.356716	0.999845	0.51073	0.657701	156	230	24.8943	0.607553	-0.549387	0.736368	0.365856	-0.904263	16	11	0.719605	0.790944	0.491619	0.271708	1.09914	22	3	0.663923	0.760152	0.685357	0.252234	1.14494	106	85	0.716109	-0.286443	0.867467	0.689157	-0.399999	73	88	0.693741	-0.385627	0.77972	0.578303	-0.555866	179	183	0.668092	-0.176336	0.933965	0.791827
CNAG_00152	1	11	1.13757	0.240564	0.999845	0.832518	0.211473	39	23	4.89799	1.25201	0.0517723	0.992837	0.967016	0.0413512	4	3	1.03536	0.36092		0.727396	0.348592	7	5	0.882159	1.09315	0.646318	0.21528	1.23918	15	18	0.960334	-0.0796185		0.933925	-0.0829071	12	18	0.878687	0.774875	0.617824	0.377855	0.881856	42	28	0.86702	0.705966	0.757174	0.415505
CNAG_00153	4	11	0.982084	-1.38195	0.999845	0.159381	-1.40716	21	10	6.24026	1.04981	0.0174164	0.9955	0.986764	0.01659	10	2	1.65694	5.01768		0.00245951	3.02828	0	6	1.64241	4.09976	0.109673	0.0125534	2.49619	4	1	1.64557	4.11405		0.0124168	2.50007	11	5	1.62227	4.22918	0.0504546	0.00913513	2.60696	16	17	1.60652	4.44389	0.0498182	0.00567199
CNAG_00154	3	21	0.677715	0.80026	0.999845	0.237674	1.18082	93	101	12.157	0.746593	0.452575	0.851027	0.544391	0.606187	12	8	1.02774	1.48422		0.148695	1.44416	9	10	1.01896	0.389763	0.938732	0.702082	0.382511	53	22	1.00938	0.62147		0.538095	0.615696	39	33	1.03547	-0.24311		0.814377	-0.234783	108	93	0.967533	0.58495	0.81997	0.545459
CNAG_00155	0	0	4.8555	0.424422		0.930345	0.0874106	0	3	0.0690633	4.99758	0.349167		0.944299	0.0698673	0	0	0.837202	1.22183	0.347197	0.144448	1.45942	0	0	0.883407	-0.616988	0.847659	0.484916	-0.698418	0	1	0.881734	-0.518321	0.809396	0.556638	-0.587843	0	0	0.806092	0.206568	0.909109	0.797751	0.256259	3	0	0.78986	0.249817	0.922578	0.75179
CNAG_00156	6	41	0.642039	0.502113	0.999845	0.43418	0.782059	144	158	21.0762	0.690752	0.135136	0.955973	0.844895	0.195636	17	13	1.66432	-4.44441		0.00757581	-2.67041	34	14	0.921654	-0.524174	0.893226	0.569538	-0.568732	62	70	1.11762	-2.25574		0.0435562	-2.01834	111	94	0.937293	-1.17132	0.435915	0.211414	-1.24969	199	161	0.897418	-0.869521	0.688361	0.332588
CNAG_00157	5	25	0.642897	0.225432	0.999845	0.72585	0.350651	82	87	13.5192	0.71539	0.0473133	0.988999	0.947269	0.0661365	10	9	0.74261	-0.473832	0.69549	0.523432	-0.638064	16	9	0.680985	-1.00712	0.532555	0.139163	-1.47892	50	31	0.607836	0.526754	0.67766	0.386158	0.866605	47	57	0.589333	0.772886	0.408393	0.189703	1.31146	81	80	0.583298	0.716307	0.573601	0.219436
CNAG_00158	3	9	0.95919	-0.0441135	0.999845	0.963318	-0.0459903	31	30	8.91662	1.00984	1.0021	0.700288	0.321032	0.99234	4	10	0.760161	0.231413	0.868715	0.760803	0.304426	7	4	0.659913	0.558818	0.792353	0.397104	0.846805	10	8	0.643144	1.14379	0.306947	0.0753315	1.77844	23	20	0.640376	0.744585	0.478978	0.244939	1.16273	36	42	0.635668	0.523736	0.754289	0.409988
CNAG_00159	0	1	2.10642	1.70912	0.999845	0.417145	0.811385	11	7	2.17885	2.36685	1.2234		0.605235	0.516887	2	0	5.99519	-0.870184		0.884595	-0.145147	1	2	5.98089	-0.530719		0.929292	-0.0887358	4	2	5.93094	0.134072		0.981965	0.0226054	5	2	5.98453	-1.12897		0.850369	-0.188648	3	15	5.97154	-1.25733		0.833236
CNAG_00160	0	1	1.72811	1.23655	0.999845	0.47427	0.715549	5	8	2.72899	1.74914	3.71347		0.0337513	2.12303	7	3	2.73533	-0.859635		0.753315	-0.314271	1	0	2.39365	2.03191		0.395952	0.848873	12	4	2.56908	0.251554		0.921999	0.0979157	5	3	2.43332	0.968297		0.69068	0.397933	2	4	2.46319	0.203122		0.934279
CNAG_00161	0	13	1.14875	0.989334	0.999845	0.389113	0.861227	58	43	6.52278	1.19744	1.31499	0.652183	0.272129	1.09817	9	7	1.77582	-0.00760178		0.996584	-0.00428072	21	13	1.57083	0.339207	0.959765	0.829033	0.215942	30	25	1.57962	0.324777		0.8371	0.205605	48	16	1.59963	-0.397702		0.803654	-0.248621	56	40	1.48735	1.37461		0.355381
CNAG_00162	18	431	0.81796	0.764605	0.999845	0.349906	0.934772	1377	1370	120.642	0.832379	-1.19512	0.497583	0.151064	-1.43578	63	32	3.37628	-2.85192		0.398283	-0.844691	134	66	3.15545	-0.917869		0.77114	-0.290884	652	538	3.35085	-2.62052		0.434188	-0.782045	767	707	3.3371	-2.89672		0.385374	-0.868037	1479	1323	3.12678	-1.242		0.69121
CNAG_00163	4	10	0.703281	0.71271	0.999845	0.310866	1.01341	58	64	14.1916	0.739541	1.70079	0.173099	0.0214602	2.29979	20	12	0.739618	0.266471	0.840243	0.718636	0.360282	17	2	0.663213	0.201581	0.94877	0.761169	0.303947	15	28	0.728621	-0.737639	0.618709	0.311358	-1.01238	27	29	0.650546	0.0918765	0.947676	0.887688	0.14123	57	79	0.645964	-0.189293	0.927315	0.769492
CNAG_00164	4	2	1.22274	-1.31957	0.999845	0.280503	-1.07919	14	4	7.29113	1.25963	0.86273	0.821485	0.493403	0.684906	5	5	0.772638	1.198	0.320777	0.121015	1.55053	7	2	0.761118	0.154706	0.961559	0.83893	0.203262	6	6	0.755165	0.321566	0.864791	0.670238	0.425822	13	18	0.714746	0.625101	0.62201	0.381803	0.874578	20	11	0.683791	1.31617	0.282203	0.0542529
CNAG_00165	10	25	0.64461	0.294094	0.999845	0.64822	0.456236	114	121	17.1421	0.728843	-0.530349	0.80599	0.466823	-0.727659	15	4	3.36271	0.581083		0.862807	0.172802	12	5	3.20424	1.80986		0.572187	0.564833	70	57	3.23694	1.64332		0.61168	0.507677	71	58	3.20424	1.40962		0.659992	0.439924	166	139	3.11101	2.21215		0.477039
CNAG_00166	3	10	0.847754	-0.155149	0.999845	0.854789	-0.183012	32	28	6.93444	0.917278	0.66091	0.808419	0.47121	0.720512	6	7	3.91795	1.93213		0.621908	0.493148	2	3	3.80767	1.81085		0.634374	0.47558	20	9	3.94195	-0.551644		0.888706	-0.139942	25	25	3.83142	1.18005		0.758087	0.307994	24	44	3.70972	2.78485		0.45284
CNAG_00167	6	22	0.707686	0.0667808	0.999845	0.924819	0.0943651	59	89	11.8647	0.776166	0.0232516	0.994371	0.976101	0.029957	9	9	3.06806	2.17927		0.477513	0.710309	11	7	3.11064	0.774728		0.803316	0.249058	31	38	2.9519	1.90837		0.517963	0.646489	34	31	2.82301	3.22789		0.252863	1.14342	110	85	2.88726	1.65521		0.566456
CNAG_00171	0	5	1.33154	0.218458	0.999845	0.869681	0.164064	18	7	3.96793	1.39329	1.64166	0.614051	0.238695	1.17825	6	3	1.09171	-0.548958		0.615076	-0.502841	4	1	0.962694	-0.659788	0.851086	0.49312	-0.685356	6	8	0.982922	-0.801337		0.414924	-0.815259	19	9	0.939483	-0.766813		0.414382	-0.816207	12	15	0.887933	-0.183682	0.948713	0.836115
CNAG_00172	11	13	0.910909	-0.869882	0.999845	0.339598	-0.95496	33	55	11.4457	0.987654	-0.704145	0.810556	0.475878	-0.712948	13	2	1.31628	-0.700359		0.594673	-0.532076	12	4	1.27434	-1.63575	0.618664	0.199281	-1.2836	14	19	1.17664	-0.652849		0.579002	-0.554843	35	21	1.13007	-0.44956		0.690765	-0.397818	74	54	1.16174	-1.36274		0.24079
CNAG_00173	1	9	1.04177	0.0785084	0.999845	0.939928	0.0753605	24	24	5.79846	1.09227	1.29472	0.611094	0.235877	1.18536	5	8	2.96996	-0.865497		0.770732	-0.291417	2	4	2.69839	1.30498		0.62866	0.483613	3	6	2.68491	1.61812		0.546727	0.602672	15	25	2.81459	-0.226665		0.935814	-0.0805321	20	24	2.94685	-1.50559		0.609409
CNAG_00174	3	27	0.790457	0.37367	0.999845	0.636408	0.472727	96	75	10.2429	0.86982	-0.184797	0.953273	0.831752	-0.212455	14	3	0.844234	0.0478857		0.954768	0.0567209	12	3	0.76249	-0.0710379	0.982882	0.925772	-0.0931657	46	22	0.768486	-0.0929879	0.962268	0.90369	-0.121001	53	64	0.743484	-0.070864	0.967994	0.924066	-0.0953134	108	94	0.725056	0.0546229	0.989954	0.939947
CNAG_00175	0	16	0.986419	0.798717	0.999845	0.418105	0.809713	55	55	8.95262	1.04902	0.86561	0.766832	0.409278	0.825164	9	6	0.445103	-0.0565798	0.942062	0.898848	-0.127116	5	4	0.391569	0.809653	0.251874	0.0386668	2.06772	42	21	0.39578	0.601074	0.399854	0.128837	1.51871	33	35	0.383314	1.30155	0.00563844	0.000684959	3.39553	46	46	0.382085	1.08863	0.0395192	0.00438327
CNAG_00176	25	87	0.446918	0.126642	0.999845	0.776896	0.283366	330	297	44.2289	0.488124	-0.518962	0.669781	0.287702	-1.06318	46	12	1.41471	-0.311739		0.825594	-0.220356	33	11	1.21321	0.197759	0.971713	0.870515	0.163004	147	120	1.2774	-0.472189		0.711644	-0.369649	178	163	1.3264	-1.37618		0.299487	-1.03753	421	405	1.18995	-0.213453		0.857639
CNAG_00177	1	0	2.22023	0.281436	0.999845	0.89913	0.12676	2	7	1.24438	2.396	1.09767		0.64686	0.458128	1	1	2.24017	-2.45326		0.273463	-1.09512	1	4	1.80534	0.466891		0.795931	0.258617	1	1	1.8524	-0.0547555		0.976419	-0.0295592	5	1	1.80756	0.0310953		0.986275	0.0172029	6	5	1.7934	-0.131674		0.941471
CNAG_00178	8	14	0.805778	-0.460609	0.999845	0.567571	-0.571633	44	51	15.8277	0.823432	1.3699	0.40369	0.0961823	1.66365	16	23	1.52968	1.417		0.354272	0.926335	8	12	1.40664	1.62983	0.678581	0.24659	1.15867	27	13	1.39987	1.85698		0.184661	1.32654	37	24	1.41101	1.14409		0.417461	0.810834	38	45	1.40061	0.937982	0.798461	0.503053
CNAG_00179	0	2	1.95886	-2.21421	0.999845	0.258326	-1.13036	2	0	3.11102	1.73578	3.04138		0.0797454	1.75217	4	5	1.34174	2.72081		0.0425783	2.02782	1	1	1.44078	0.382798	0.951323	0.790479	0.265689	2	1	1.33744	1.66062		0.214367	1.24165	3	2	1.28189	2.68023	0.138103	0.0365423	2.09084	4	3	1.28121	2.30673	0.334437	0.0717937
CNAG_00180	4	33	0.762627	0.310742	0.999845	0.683668	0.407463	95	107	14.0286	0.82968	-0.186896	0.950679	0.821775	-0.225262	12	7	1.83535	-2.0564		0.262526	-1.12044	9	9	1.42188	-1.1881	0.795534	0.403387	-0.835587	49	38	1.82881	-3.11142		0.0888805	-1.70133	38	52	1.39282	-1.34047		0.335843	-0.962411	103	129	1.38091	-1.62774		0.2385
CNAG_00181	0	11	1.19392	0.312744	0.999845	0.793362	0.261948	27	27	4.02177	1.3493	-0.193272	0.970946	0.886101	-0.143239	3	2	0.78009	-1.29306	0.285266	0.0974036	-1.65757	4	1	0.589612	0.443545	0.828182	0.451891	0.752266	15	11	0.605742	-0.0371657	0.977936	0.951076	-0.0613556	14	18	0.576526	0.75208	0.411497	0.192062	1.3045	24	27	0.581669	0.0268456	0.995013	0.963189
CNAG_00182	5	15	0.957066	-0.0994824	0.999845	0.917213	-0.103945	59	40	9.14183	1.12693	-1.27578	0.636768	0.2576	-1.13208	1	4	1.06402	0.201339		0.849917	0.189225	4	1	0.95867	0.168022	0.969471	0.860871	0.175266	18	9	1.00108	-0.323613		0.746495	-0.323265	21	23	0.98654	-0.64113		0.515771	-0.649878	58	53	0.905777	0.61307	0.797746	0.498505
CNAG_00183	14	58	0.43806	-0.333158	0.999845	0.446937	-0.760531	134	149	31.6015	0.470243	0.359614	0.788511	0.444426	0.764741	39	22	1.65973	-1.77416		0.285094	-1.06895	27	19	1.05957	0.350871	0.94877	0.740535	0.331145	73	59	1.18902	-0.830699		0.484778	-0.698639	102	66	1.0728	-0.240259		0.822793	-0.223954	154	125	1.08535	-0.800907	0.782155	0.460558
CNAG_00184	19	46	0.479869	-0.41535	0.999845	0.386737	-0.865549	131	138	41.8001	0.492962	1.21775	0.130399	0.013501	2.47027	67	42	1.78449	1.48148		0.40643	0.830193	58	27	1.72076	0.988515		0.565655	0.574463	92	62	2.12242	-1.59369		0.452722	-0.750884	71	71	1.69722	0.979206		0.563975	0.576948	152	145	1.71196	0.315801		0.853647
CNAG_00185	6	52	0.73756	0.232204	0.999845	0.752893	0.314827	169	125	22.1791	0.770002	0.287975	0.920729	0.70841	0.373992	16	20	1.74111	-1.4582		0.402308	-0.837507	30	5	1.13184	1.81658	0.46989	0.108497	1.60498	53	73	1.74832	-2.58502		0.139256	-1.47857	64	72	1.37594	-1.49779		0.276349	-1.08856	163	145	1.19373	-0.325858	0.93325	0.784873
CNAG_00186	2	2	1.42729	-0.856766	0.999845	0.548323	-0.600275	5	9	2.92153	1.49532	0.922835		0.537137	0.617148	3	3	1.5216	-1.35167		0.374369	-0.88832	3	1	1.31804	-1.50566	0.68599	0.253312	-1.14234	2	10	1.21346	-0.45044		0.710486	-0.371204	7	1	1.17463	-0.363016		0.757285	-0.309048	4	8	1.168	-0.642753		0.582114
CNAG_00187	2	23	0.866402	0.782809	0.999845	0.366251	0.903517	91	93	11.4861	0.919347	0.579289	0.841888	0.528623	0.630109	13	8	2.21224	3.01989		0.172227	1.36508	19	3	2.41813	0.786369		0.745032	0.325197	33	27	2.15459	2.29279		0.287264	1.06414	45	42	2.03875	3.18758		0.117935	1.5635	89	72	2.01677	3.28681		0.103156
CNAG_00188	4	5	1.02304	-0.370861	0.999845	0.716973	-0.362508	15	28	5.04386	1.11709	0.252779	0.950364	0.820981	0.226283	6	3	2.29214	0.529342		0.817363	0.230938	4	0	1.9795	1.36269		0.4912	0.688402	12	12	1.9398	1.97041		0.309735	1.01578	12	7	1.91727	1.86723		0.330107	0.973899	28	27	1.89853	1.89359		0.318571
CNAG_00189	4	7	1.01747	-0.155279	0.999845	0.878703	-0.152613	32	26	6.9236	1.0766	0.709673	0.83117	0.509778	0.659183	4	8	0.645292	1.32574	0.178502	0.0399298	2.05447	10	1	0.629938	0.421649	0.857715	0.503273	0.669349	11	10	0.635166	0.392174	0.794438	0.536947	0.617436	17	15	0.612604	0.447172	0.693147	0.465419	0.729953	26	29	0.580054	1.48868	0.0833708	0.0102746
CNAG_00190	13	53	0.524196	-0.186421	0.999845	0.722116	-0.355632	156	132	24.1088	0.578506	-0.399464	0.819609	0.489873	-0.69051	29	7	3.54882	-2.86652		0.419241	-0.807738	28	14	3.52744	-2.56232		0.467595	-0.726397	89	69	3.52486	-2.63696		0.454398	-0.748104	73	67	3.42492	-2.26274		0.508825	-0.660669	147	178	3.34266	-1.78346		0.593658
CNAG_00191	2	7	0.94712	-0.273491	0.999845	0.772765	-0.288761	22	16	4.55725	1.04371	0.537696	0.881901	0.606429	0.515178	6	3	2.32287	2.10019		0.365923	0.904136	7	0	2.28056	1.31691		0.563636	0.577449	18	13	2.59677	-1.99259		0.442883	-0.767334	11	19	2.3332	0.373892		0.872685	0.160249	19	27	2.20228	2.0347		0.355535
CNAG_00192	2	1	1.31246	1.33244	0.999845	0.31	1.01522	24	26	3.3795	1.45412	0.935998	0.837184	0.519778	0.643687	3	2	0.795357	0.0816782	0.951585	0.918206	0.102694	1	0	0.688329	0.653663	0.758397	0.342296	0.949638	16	13	0.699954	0.427157	0.79796	0.541687	0.610264	11	16	0.719901	-0.502686	0.706415	0.485008	-0.698271	19	23	0.682409	0.0358381	0.994595	0.958117
CNAG_00193	13	43	0.486601	0.0438444	0.999845	0.928205	0.0901035	153	145	24.4706	0.544778	-0.226579	0.908593	0.677475	-0.415911	24	10	0.787448	-0.749462	0.548002	0.341219	-0.95176	20	11	0.750337	-1.37651	0.355833	0.066576	-1.83453	77	55	0.766413	-1.56995	0.211556	0.0405173	-2.04844	100	84	0.69498	0.0200275	0.990635	0.97701	0.0288174	153	177	0.756414	-2.30028	0.0227958	0.00235764
CNAG_00194	9	14	0.699938	0.0451269	0.999845	0.948594	0.0644728	76	67	12.4579	0.835648	-0.923357	0.649273	0.269177	-1.10496	7	3	2.75944	-0.864784		0.753983	-0.313391	10	1	2.5519	0.450143		0.859984	0.176395	20	26	2.44413	1.70753		0.484788	0.698623	51	53	2.58842	-0.209661		0.935442	-0.0809995	80	96	2.40041	1.74775		0.466551
CNAG_00195	0	2	1.49714	1.21491	0.999845	0.417086	0.811488	14	8	2.76461	1.5872	2.23252		0.159553	1.40658	4	2	2.11914	1.96776		0.353115	0.928564	0	0	1.98269	2.50132		0.207101	1.26158	2	10	2.00336	2.16897		0.278958	1.08266	5	13	2.0203	1.38766		0.492173	0.686856	22	12	1.95059	2.79564		0.151792
CNAG_00229	1359	11487	0.907417	-6.09317	1.33103e-09	1.8826e-11	-6.71485	691	96	6439.92	0.905997	1.67431	0.329306	0.0645986	1.84803	10037	10087	0.884532	0.806403	0.567136	0.361942	0.911671	11235	9459	0.884839	-7.34829	1.72688e-14	1.00105e-16	-8.30466	113	96	0.884537	-1.85154	0.197765	0.036329	-2.09323	5203	3743	0.88456	-4.36558	1.4035e-05	8.00224e-07	-4.93531	5397	1283	0.884884	-8.34289	1.06237e-18	4.17056e-21
CNAG_00231	3	1	1.27239	-0.191707	0.999845	0.880238	-0.150667	13	13	7.3837	1.29473	2.06298	0.428627	0.111078	1.59337	5	9	0.552753	0.259926	0.786137	0.638184	0.470239	4	2	0.526209	0.237092	0.926042	0.652302	0.450567	11	19	0.515697	1.35067	0.0831482	0.00881577	2.61912	12	6	0.512172	1.42823	0.0330651	0.00529411	2.78857	10	22	0.509778	1.61228	0.0156123	0.00156313
CNAG_00232	46	120	0.394113	-0.131359	0.999845	0.738905	-0.333304	430	404	78.3387	0.422076	-0.452813	0.665361	0.283351	-1.07282	67	26	1.44555	2.36676		0.101574	1.63727	57	23	1.37836	2.56382	0.343811	0.0628783	1.86005	172	119	1.47018	0.92253		0.530335	0.627495	297	276	1.41936	1.15022		0.417721	0.810382	548	588	1.9666	-3.89034	0.262221	0.0479052
CNAG_00233	7	5	0.989173	-0.0842078	0.999845	0.932158	-0.0851295	35	47	10.3767	1.05994	0.18062	0.963915	0.864691	0.170405	13	2	6.76668	0.581073		0.931568	0.0858726	4	3	6.76668	-0.636661		0.92504	-0.0940876	15	11	6.68935	1.92501		0.773521	0.287773	23	10	6.7444	0.619957		0.92676	0.0919218	42	32	6.76668	-1.45049		0.830268
CNAG_00234	1	5	1.24861	0.912912	0.999845	0.464693	0.731141	32	23	4.0897	1.3263	1.27741	0.713221	0.335479	0.963137	10	1	2.27324	-1.07493		0.63631	-0.472864	0	1	2.3014	-2.25231		0.327744	-0.978667	13	5	2.11693	-1.3256		0.531192	-0.626187	19	16	2.10967	-1.78247		0.398163	-0.844907	40	36	1.89774	-0.244823		0.897352
CNAG_00235	23	37	0.735595	-0.823593	0.999845	0.262872	-1.11963	130	85	27.3579	0.767475	-0.356228	0.897037	0.642536	-0.464157	40	6	0.579964	0.0248085	0.979019	0.96588	0.042776	27	18	0.582459	-1.25476	0.2173	0.0312203	-2.15425	43	50	0.56342	-0.685212	0.528804	0.223922	-1.21616	114	70	0.550437	-0.750755	0.38466	0.172591	-1.36392	121	137	0.54091	-0.739316	0.513901	0.171687
CNAG_00236	1	9	0.998593	0.349133	0.999845	0.72662	0.349625	22	36	6.89908	1.07726	0.873071	0.771327	0.417679	0.810454	4	6	0.797346	-0.191372		0.810322	-0.240011	5	4	0.739585	-0.596552	0.806132	0.419895	-0.806603	12	13	0.725513	-0.229535	0.900359	0.751717	-0.316376	17	14	0.738246	-0.979482	0.400789	0.184585	-1.32677	26	31	0.759416	-1.73281	0.150886	0.0225031
CNAG_00237	40	184	0.463134	0.246096	0.999845	0.595162	0.531371	602	671	86.6284	0.484621	-0.467546	0.712541	0.334662	-0.964767	90	24	1.52177	-3.53551	0.13144	0.0201633	-2.32329	77	22	0.731613	0.427189	0.88941	0.559288	0.5839	248	255	1.01349	-2.73714	0.0736755	0.00691932	-2.7007	407	316	0.861034	-2.1613	0.063573	0.012069	-2.51012	869	835	0.741165	-0.690544	0.704328	0.351491
CNAG_00238	75	243	0.303917	-0.235652	0.999845	0.438114	-0.775383	734	676	138.93	0.321506	-0.286346	0.739781	0.373123	-0.89064	137	53	1.55389	1.20068		0.439706	0.77269	100	29	1.74419	-1.28227	0.832478	0.462239	-0.735165	381	276	1.46505	1.37676		0.347353	0.939736	495	447	1.4518	1.21594		0.40229	0.837539	934	1016	1.45375	0.754584		0.603719
CNAG_00239	4	12	0.770302	-0.341516	0.999845	0.657511	-0.443353	35	31	7.98034	0.857467	0.18352	0.952667	0.830527	0.214026	6	6	0.798939	-1.05681	0.395264	0.185912	-1.32277	5	9	0.543283	2.96381	9.55979e-07	4.88689e-08	5.45538	18	12	0.558732	1.58881	0.0569965	0.00446074	2.8436	26	27	0.63264	-1.03684	0.274403	0.101231	-1.63891	36	35	0.658978	-1.8184	0.0507673	0.00579042
CNAG_00240	8	25	0.607615	-0.0191947	0.999845	0.974799	-0.0315903	96	74	15.1716	0.675196	-0.0389301	0.989641	0.954021	-0.0576576	19	5	1.13698	-0.374305		0.741997	-0.32921	6	7	0.940612	0.893488	0.758368	0.342163	0.949901	48	35	0.974615	0.199985		0.83742	0.205194	55	44	1.03917	-1.18328	0.490197	0.254835	-1.13868	76	75	0.929969	0.449104	0.860658	0.62915
CNAG_00241	4	11	1.06382	0.0351382	0.999845	0.973651	0.0330301	49	34	8.17669	1.12616	0.373802	0.928768	0.739945	0.331926	2	9	1.64075	-2.45519		0.134554	-1.49638	13	1	1.01148	-0.0634221	0.989169	0.950004	-0.062702	13	14	1.09304	-0.968406		0.375633	-0.885972	24	31	1.03756	-0.855565		0.409602	-0.824594	58	50	1.02364	-1.06544		0.297949
CNAG_00242	0	0	2.19199	1.82644	0.999845	0.404713	0.833233	2	6	2.82183	2.18092	5.17037		0.017753	2.37073	3	6	2.01468	2.36993		0.239462	1.17633	2	1	1.99776	1.32204		0.508124	0.661762	0	0	2.31009	-0.597543		0.795892	-0.258667	1	0	2.30907	-1.01658		0.659752	-0.440255	2	0	1.90192	2.24951		0.236905
CNAG_00243	2	9	1.0084	-0.324272	0.999845	0.747778	-0.32157	18	25	6.24381	1.0584	1.04056	0.703306	0.325534	0.98315	10	5	3.06974	0.497411		0.871277	0.162037	3	2	2.9295	0.362176		0.901608	0.123631	8	1	3.07326	-0.626675		0.838422	-0.203912	6	13	2.82329	1.24315		0.659706	0.440319	13	20	2.95352	-0.630051		0.831076
CNAG_00246	1	4	1.3833	1.51103	0.999845	0.274687	1.09233	29	42	3.4634	1.91142	-1.74483	0.733666	0.361324	-0.912846	1	0	3.41243	2.21428		0.516413	0.648885	2	1	3.29911	1.91997		0.56059	0.581966	22	12	3.28598	2.16024		0.510916	0.657412	21	18	3.42664	0.528196		0.877496	0.154144	42	34	3.27535	1.37077		0.675575
CNAG_00247	8	45	0.622045	-0.151912	0.999845	0.807065	-0.244214	117	106	19.7095	0.669014	-0.0431698	0.989043	0.94855	-0.0645275	18	13	1.70542	-1.00901		0.554088	-0.591645	12	12	1.12521	1.33604	0.666112	0.23508	1.18737	64	66	1.12384	1.44852		0.197433	1.2889	76	89	1.10686	1.31166		0.236004	1.18503	179	156	1.10268	1.0092	0.710402	0.360071
CNAG_00248	1	4	1.16312	0.109702	0.999845	0.924857	0.094317	12	15	3.66205	1.20389	1.95064	0.42	0.105172	1.62028	11	3	0.630423	-0.957653	0.330267	0.128746	-1.51906	0	3	0.552282	0.23173	0.932248	0.674787	0.419587	12	9	0.548697	0.632162	0.557412	0.249274	1.15211	14	12	0.540336	1.18239	0.11703	0.0286514	2.18825	24	18	0.539749	0.888326	0.394883	0.0998019
CNAG_00249	4	23	0.62842	0.0140001	0.999845	0.982226	0.0222782	74	56	13.7339	0.66119	1.1679	0.360117	0.0773341	1.76637	26	13	0.710286	2.42219	0.0215984	0.00064926	3.41015	23	9	0.700382	1.50938	0.217085	0.031155	2.15509	40	26	0.755591	0.340723	0.861278	0.652036	0.450935	32	46	0.69269	1.39573	0.156977	0.0439112	2.01494	64	60	0.683743	1.42038	0.221268	0.0377691
CNAG_00250	11	28	0.68445	-0.193743	0.999845	0.777128	-0.283064	86	101	18.5382	0.73589	-0.099936	0.971428	0.891977	-0.135803	18	9	1.08181	0.258288		0.811295	0.238756	13	6	0.994868	0.449692	0.926042	0.651261	0.452011	50	43	1.0802	-0.857361		0.427365	-0.793709	86	106	1.02837	-0.653193	0.735094	0.525314	-0.635175	104	115	0.998915	-0.460541	0.866669	0.644769
CNAG_00251	0	3	3.29837	-1.47902		0.653859	-0.448408	2	2	0.431741	3.489	-0.624426		0.857961	-0.17897	1	0	0.91117	0.450099		0.621321	0.493979	1	2	0.859763	-0.111059	0.980157	0.89722	-0.129175	2	0	0.937749	-0.94116		0.315553	-1.00364	2	3	0.833856	-0.0561958	0.979588	0.946269	-0.0673928	3	2	0.800958	0.434239	0.841535	0.587716
CNAG_00252	4	3	1.53881	-0.837498	0.999845	0.586269	-0.544251	9	20	6.14516	1.60215	0.272768	0.963915	0.864812	0.170251	0	6	2.08906	1.26884		0.543604	0.607373	5	1	2.19271	-0.709963		0.746102	-0.323783	10	8	2.02736	0.846114		0.676424	0.417347	8	11	2.06488	-0.125297		0.951614	-0.0606802	10	11	1.98761	0.670893		0.735712
CNAG_00253	0	16	1.21346	0.349858	0.999845	0.773107	0.288314	45	32	7.59746	1.27366	0.673492	0.877526	0.596953	0.528787	11	3	1.34385	1.82056		0.175501	1.35474	4	1	1.21491	2.67961	0.198698	0.027412	2.2056	20	20	1.23185	2.28418		0.0637007	1.85427	27	31	1.23615	1.68699	0.38466	0.172342	1.36472	48	41	1.21274	1.94386	0.411063	0.108964
CNAG_00254	8	56	0.584754	0.0345035	0.999845	0.952948	0.0590051	140	155	19.2148	0.65456	-0.699669	0.667018	0.285108	-1.06892	16	8	1.08212	0.637818		0.555583	0.589415	16	5	1.07365	-0.476348	0.927881	0.65728	-0.443672	65	58	1.08259	-0.502197		0.64273	-0.463886	87	96	1.04093	-0.369957		0.722281	-0.355412	154	153	1.07917	-1.36007	0.559042	0.207564
CNAG_00255	1	2	1.21507	1.75717	0.999845	0.148134	1.44615	26	28	3.78682	1.34404	1.47177	0.654403	0.273502	1.09503	4	2	0.727932	1.6142	0.149718	0.0265882	2.21751	3	3	0.718969	0.625692	0.787184	0.384157	0.870263	6	5	0.718528	0.73302	0.615713	0.307648	1.02017	11	14	0.700321	0.884066	0.429938	0.206814	1.26237	22	34	0.697247	0.621312	0.720583	0.372879
CNAG_00256	17	47	0.465144	-0.0151757	0.999845	0.973973	-0.0326258	171	168	26.8227	0.532359	-0.607381	0.632254	0.253902	-1.14092	19	11	1.36827	0.49085		0.719792	0.358737	8	11	1.53712	-1.64214	0.720642	0.285374	-1.06833	69	65	1.35734	-0.558907		0.680512	-0.411765	106	84	1.333	-0.855872		0.520831	-0.642065	228	197	1.21549	0.300269	0.939662	0.804881
CNAG_00257	6	34	0.63946	-0.198553	0.999845	0.75618	-0.310501	91	73	20.4907	0.691921	0.109711	0.968419	0.874016	0.158559	25	5	0.605914	-0.227724	0.833333	0.707039	-0.375836	15	5	0.525245	0.334353	0.87042	0.524408	0.636566	29	35	0.581464	-0.986371	0.335307	0.0898179	-1.69636	59	64	0.583555	-1.51433	0.0519749	0.00945877	-2.59501	107	95	0.519541	-0.226548	0.877286	0.662798
CNAG_00258	11	12	0.864531	-0.459959	0.999845	0.594703	-0.532033	64	50	17.2067	0.884823	1.02864	0.621797	0.245017	1.16254	20	19	1.14959	0.124447		0.913795	0.108254	9	6	1.0235	0.527905	0.909992	0.606005	0.515784	30	29	1.27451	-1.81857		0.153615	-1.42688	49	39	1.28346	-2.35357		0.0666889	-1.83377	60	69	1.05495	-0.859891	0.756517	0.415012
CNAG_00259	6	18	0.780671	-0.042465	0.999845	0.95662	-0.0543956	69	54	9.63873	0.91735	-0.944976	0.683518	0.302956	-1.03011	3	5	1.90778	2.39894		0.208589	1.25745	5	1	2.26541	-2.07841	0.769217	0.358903	-0.917457	27	23	1.88972	1.44809		0.443499	0.766298	32	39	1.93065	0.571968		0.767034	0.296257	62	74	1.78384	2.54857		0.15309
CNAG_00260	14	48	0.507161	-0.286335	0.999845	0.572356	-0.564585	135	126	22.0192	0.572887	-0.604807	0.671918	0.291097	-1.05572	18	10	1.69134	-1.45119		0.390887	-0.858009	24	12	1.10105	0.790393	0.838524	0.472847	0.717855	74	56	1.16838	0.0305344		0.97915	0.026134	89	75	1.06871	1.03521		0.332717	0.968656	167	206	1.09575	0.0681326	0.992335	0.95042
CNAG_00261	66	187	0.348939	-0.165633	0.999845	0.635018	-0.474676	676	544	110.95	0.363588	0.0425633	0.975601	0.906809	0.117065	129	62	1.63496	-1.77699		0.277096	-1.08687	96	48	1.04524	0.0384654	0.992743	0.970644	0.0368005	278	193	1.03267	0.274672		0.790253	0.265982	389	428	0.970675	0.881101		0.364027	0.907719	737	1042	0.983727	0.172608	0.95759	0.860716
CNAG_00262	2	4	1.51725	-2.53116	0.999845	0.095265	-1.66826	6	0	3.72279	1.47971	1.05366	0.810707	0.476419	0.712074	5	4	0.587033	1.54157	0.083619	0.00863854	2.62604	1	0	0.627054	-0.544223	0.788217	0.385447	-0.867905	2	2	0.564208	1.25335	0.160295	0.0263213	2.22144	5	3	0.553447	1.39954	0.0611433	0.0114465	2.52876	5	14	0.549822	1.29311	0.132671	0.0186796
CNAG_00263	2	4	0.909991	0.420027	0.999845	0.644388	0.461572	20	23	11.9372	0.928116	2.68134	0.0522211	0.00386453	2.88901	14	12	1.49905	2.0366		0.174277	1.35859	12	5	1.54491	0.365591	0.956241	0.812934	0.236643	14	5	1.92441	-1.53177		0.426051	-0.795968	7	14	1.60496	-0.496684		0.756965	-0.309468	22	21	1.43338	1.02777		0.47336
CNAG_00264	10	73	0.536944	0.443735	0.999845	0.408572	0.82641	266	238	35.7389	0.579102	-0.17056	0.937295	0.768357	-0.294524	31	14	1.00821	2.94941	0.0540309	0.00344017	2.9254	37	28	0.970361	2.92716	0.0276694	0.00255653	3.01657	143	132	1.05632	1.00718	0.642277	0.340345	0.953484	140	127	0.992864	1.70612	0.245741	0.0857262	1.71839	343	322	1.00399	1.01783	0.671344	0.310683
CNAG_00265	16	43	0.439916	-0.0889847	0.999845	0.8397	-0.202277	149	148	34.878	0.494962	-0.163808	0.929374	0.740682	-0.33095	25	13	0.765324	1.09629	0.355902	0.152013	1.43246	21	15	0.715509	1.059	0.532023	0.138855	1.48007	74	48	0.72816	0.759074	0.611723	0.297201	1.04245	84	74	0.702609	1.20126	0.248451	0.0873192	1.70971	153	127	0.695592	1.20171	0.361868	0.0840578
CNAG_00266	2	15	0.813745	0.547709	0.999845	0.500902	0.673072	41	73	9.90713	0.869684	0.930545	0.666651	0.284628	1.06998	13	7	0.492855	-0.744749	0.332518	0.130766	-1.51109	12	10	0.431108	-0.0974804	0.957683	0.821111	-0.226116	26	29	0.424442	0.445841	0.606893	0.293527	1.05042	25	25	0.416171	0.765799	0.204737	0.0657522	1.84011	69	39	0.41335	0.789868	0.28804	0.0560184
CNAG_00267	1	8	0.773145	2.30536	0.0577537	0.00286562	2.9818	100	113	11.942	0.871461	1.14129	0.549653	0.190322	1.30963	9	4	0.959241	0.0728671		0.939448	0.0759633	4	2	0.828404	0.354307	0.931921	0.66887	0.427699	81	48	0.853674	0.0302633	0.985712	0.97172	0.0354506	16	13	0.789821	0.887787	0.497343	0.260998	1.12404	29	23	0.774751	1.09467	0.497041	0.157674
CNAG_00268	25	88	0.427277	-0.165084	0.999845	0.699228	-0.386363	261	254	45.9822	0.45828	-0.110389	0.946875	0.80965	-0.240877	50	23	0.579989	-1.5697	0.0746246	0.00680099	-2.70643	30	10	0.457366	0.396357	0.788461	0.386157	0.866608	147	130	0.493033	-1.15809	0.132268	0.0188284	-2.34891	133	182	0.460346	-0.231219	0.797317	0.615476	-0.502272	313	336	0.452861	0.022256	0.994948	0.960803
CNAG_00269	1	5	1.36647	-0.763271	0.999845	0.576453	-0.558573	5	12	2.40878	1.71394	-1.109		0.517604	-0.647043	2	0	1.4079	0.525778		0.708815	0.373448	7	1	1.80495	-2.23116	0.646475	0.216409	-1.23613	7	5	1.31431	0.0446517		0.972898	0.0339735	9	3	1.34469	-0.683463		0.611265	-0.508268	11	2	1.187	0.887062	0.779736	0.454873
CNAG_00270	17	14	0.818347	-0.286059	0.999845	0.726671	-0.349558	105	84	21.7287	0.871241	-0.4479	0.881901	0.607186	-0.514094	11	10	2.89416	0.502166		0.862251	0.17351	12	4	2.61819	1.90824		0.466099	0.728841	47	44	2.77808	0.226471		0.935028	0.0815207	46	58	2.88797	-0.957963		0.74011	-0.331708	128	132	2.66441	0.349565		0.895619
CNAG_00271	0	5	1.63523	0.960991	0.999845	0.556748	0.587679	13	26	3.35355	1.72478	1.24515	0.808067	0.470343	0.721921	8	0	0.596532	0.596502	0.534564	0.317335	0.99995	4	2	0.548502	0.962158	0.397027	0.0794036	1.75416	4	8	0.544319	1.32811	0.112023	0.0146893	2.43995	14	16	0.532797	1.94962	0.00227902	0.000252989	3.65922	25	25	0.532519	1.58446	0.0278229	0.00292593
CNAG_00272	4	33	0.634588	0.609697	0.999845	0.336665	0.960776	111	142	23.3341	0.670204	0.896766	0.537095	0.180881	1.33805	26	15	1.72774	-1.40743		0.415297	-0.814608	14	9	1.15563	1.04615	0.774725	0.365326	0.905263	64	56	1.36015	-0.942733		0.488241	-0.693109	75	68	1.17137	0.347041		0.767024	0.29627	123	117	1.13735	0.669941	0.825221	0.555838
CNAG_00273	1	2	1.61627	-1.24064	0.999845	0.442727	-0.767596	3	4	1.97275	1.99949	-1.0138		0.612136	-0.507027	0	1	1.07069	0.34603		0.746555	0.323185	0	0	0.987229	0.123193	0.981793	0.900693	0.124787	3	2	0.938987	1.31717		0.160691	1.40275	6	6	0.968072	0.0666334	0.979181	0.945124	0.0688311	6	6	0.95213	0.0266215	0.99709	0.977694
CNAG_00274	6	7	0.94885	-0.219181	0.999845	0.817317	-0.230997	30	42	5.90515	1.11366	-0.922604	0.765112	0.407419	-0.828444	4	2	0.659952	-0.925465	0.364801	0.160819	-1.40232	2	13	0.51821	0.220049	0.932147	0.671105	0.424633	21	27	0.51847	0.30484	0.809396	0.556558	0.587962	14	9	0.496711	0.913035	0.205306	0.0660384	1.83816	31	19	0.495056	0.635839	0.547277	0.19901
CNAG_00275	4	19	0.672664	0.609634	0.999845	0.364779	0.906297	83	88	10.6208	0.821844	-0.705603	0.751707	0.390583	-0.858561	5	4	1.16875	0.115983		0.92095	0.0992375	5	7	1.19126	-1.24342	0.731307	0.296583	-1.04379	53	20	1.05314	0.11946		0.909688	0.113432	43	40	1.06494	-0.533544		0.616366	-0.501008	72	77	0.986142	0.636738	0.805083	0.518483
CNAG_00276	1	0	1.86444	1.32199	0.999845	0.478293	0.709051	10	7	2.44004	1.90772	3.13079		0.100773	1.64112	3	4	2.67504	1.95541		0.464789	0.730984	0	0	2.32806	4.74499		0.0415325	2.03817	3	0	2.37876	3.38736		0.154447	1.424	4	10	2.68619	0.348833		0.896676	0.129862	6	23	2.46323	1.40823		0.567524
CNAG_00277	3	9	0.944569	-1.06415	0.999845	0.259914	-1.12659	14	16	4.55624	1.11898	-0.735611	0.83135	0.510928	-0.657393	3	2	1.61989	-0.43456		0.788496	-0.268265	3	3	1.91435	-4.07936		0.033094	-2.13094	14	7	1.4179	-0.262522		0.853112	-0.185149	12	7	1.3118	0.888502		0.498205	0.677317	11	18	1.34376	-0.214941		0.872917
CNAG_00278	3	15	0.791787	-0.955745	0.999845	0.227404	-1.20707	26	19	6.69876	0.883185	-0.0818029	0.983157	0.926203	-0.0926227	7	4	2.73496	-1.86161		0.496079	-0.680673	2	0	2.37746	1.40567		0.554354	0.591248	14	8	2.45565	0.189767		0.938403	0.0772778	20	21	2.53759	-1.0377		0.682589	-0.408933	31	51	2.4007	0.0774739		0.974256
CNAG_00279	29	50	0.675534	-0.553801	0.999845	0.412332	-0.819797	153	181	33.4125	0.714002	-0.785304	0.651911	0.271392	-1.09986	36	7	1.92792	3.65171		0.0582084	1.89412	23	6	1.85983	3.14376		0.0909616	1.69035	70	64	2.02182	1.87716		0.353175	0.928448	91	129	2.22031	0.416095		0.851344	0.187404	270	236	1.80981	3.18824		0.0781285
CNAG_00280	19	64	0.525009	-0.152594	0.999845	0.771319	-0.29065	211	175	28.8907	0.561977	-0.210884	0.920729	0.707471	-0.375254	43	11	0.979879	1.91582		0.0505641	1.95516	16	7	1.34899	-1.94211	0.550448	0.149958	-1.43968	98	86	1.22471	-1.33438		0.27591	-1.08955	125	111	1.34415	-2.34451		0.0811188	-1.74423	272	256	0.984009	-0.187213	0.952331	0.849109
CNAG_00283	1	6	1.26701	-0.0970741	0.999845	0.938929	-0.0766164	18	13	3.86409	1.4326	-0.0503987	0.993906	0.971936	-0.0351798	5	0	1.05097	1.08048	0.522391	0.303913	1.02808	1	3	0.930893	1.43754	0.4999	0.122525	1.54426	8	7	0.978741	0.711718	0.737027	0.467117	0.727177	15	14	0.951829	0.624251	0.724783	0.511925	0.655844	15	22	0.896833	1.64261	0.320753	0.0670164
CNAG_00284	0	1	1.53517	3.4867	0.360674	0.0231337	2.27122	21	41	6.30068	1.59651	3.73311	0.161413	0.0193722	2.33829	4	5	1.8978	3.07245		0.105456	1.61896	6	5	1.65703	4.79644	0.0389469	0.00379638	2.8946	13	17	1.91187	1.86865		0.328375	0.977391	7	9	1.72356	2.94037		0.088011	1.70598	16	5	1.6567	3.99951	0.116933	0.0157726
CNAG_00285	32	90	0.663176	0.75248	0.999845	0.256517	1.13466	409	704	71.3646	0.690182	-0.572046	0.765073	0.407199	-0.828833	31	25	1.11572	-1.53032		0.170186	-1.37161	34	15	0.802449	0.376512	0.919468	0.638924	0.469204	270	262	0.939005	-1.54517		0.0998576	-1.64554	182	97	0.860576	-1.18107	0.381703	0.169932	-1.37242	364	198	0.816271	-0.790653	0.688361	0.332737
CNAG_00286	11	43	0.486324	0.0595235	0.999845	0.902587	0.122395	148	134	24.7402	0.538384	0.0144557	0.994371	0.978579	0.0268502	22	14	1.71433	0.017441		0.991883	0.0101736	14	14	1.69628	-1.05709	0.875039	0.533164	-0.623183	59	68	1.65374	-0.530722		0.74827	-0.320922	76	84	1.83388	-2.37661		0.194995	-1.29594	166	205	1.57855	-0.145712		0.926454
CNAG_00287	15	86	0.506938	0.358624	0.999845	0.479298	0.707432	263	335	44.4514	0.543583	-0.216336	0.914197	0.690644	-0.397981	33	20	5.62889	0.581077		0.917779	0.103231	31	11	5.53569	1.81202		0.743415	0.327334	146	131	5.59691	1.15444		0.836584	0.206265	182	147	5.55423	1.15615		0.835107	0.208156	425	356	5.5531	0.764363		0.89052
CNAG_00288	5	8	0.799522	1.36891	0.969276	0.0868663	1.71216	71	124	12.73	0.868334	0.812138	0.721754	0.349643	0.935283	12	6	6.76668	0.581073		0.931568	0.0858726	7	2	6.76668	-0.636661		0.92504	-0.0940876	49	33	6.76668	-0.551636		0.935027	-0.0815223	30	45	6.76668	-1.04608		0.877142	-0.154593	47	59	6.65809	1.75136		0.792518
CNAG_00289	1	5	1.33719	-0.693387	0.999845	0.60408	-0.518542	10	8	3.24888	1.41032	0.86174		0.541184	0.611024	7	1	0.845949	0.335142	0.826349	0.691977	0.396173	3	2	0.729384	1.61632	0.194693	0.026691	2.21601	3	5	0.844087	-0.774868	0.654958	0.358621	-0.917995	15	7	0.795919	-0.621153	0.667788	0.435142	-0.780422	17	13	0.732874	0.636341	0.731206	0.38524
CNAG_00290	6	16	0.666755	0.155671	0.999845	0.815392	0.233476	73	58	10.8763	0.824267	-0.868847	0.672527	0.291844	-1.05408	7	2	3.12089	-2.44358		0.433643	-0.782974	8	4	3.10856	-2.25189		0.46881	-0.724416	36	33	3.09286	-2.20852		0.475184	-0.714069	58	56	3.12089	-4.07076		0.192111	-1.30436	98	101	2.84043	-0.669767		0.813589
CNAG_00291	2	4	1.24183	0.417645	0.999845	0.736634	0.336314	21	24	2.84856	1.46746	-0.446335		0.76101	-0.304155	1	2	0.725622	0.668337	0.562665	0.357022	0.921055	6	1	0.698906	-0.18144	0.952882	0.795167	-0.259606	13	13	0.650837	0.82601	0.505537	0.204387	1.26915	9	26	0.629144	1.02838	0.274946	0.10214	1.63457	31	18	0.619281	1.08616	0.350886	0.0794456
CNAG_00292	30	133	0.406335	0.0220334	0.999845	0.956756	0.0542246	424	381	62.0513	0.435948	-0.369719	0.756629	0.396393	-0.84808	46	33	1.83404	2.07624		0.257611	1.13205	37	32	1.80544	1.3106		0.467889	0.725918	205	131	1.8193	1.16505		0.521925	0.640381	270	296	2.20385	-2.00093		0.363918	-0.907925	569	672	2.21857	-2.48764		0.262168
CNAG_00293	10	31	0.551521	-0.0109713	0.999845	0.984129	-0.0198928	94	118	18.8209	0.638116	-0.559319	0.745439	0.38075	-0.876516	11	8	3.5914	-1.86162		0.60421	-0.518356	16	1	3.5914	-3.07938		0.391207	-0.857431	45	23	3.54534	-1.36411		0.700415	-0.38476	57	51	3.41133	-0.6861		0.840602	-0.201124	106	119	3.34411	0.0743275		0.982267
CNAG_00294	8	29	0.552191	-0.0772415	0.999845	0.888753	-0.139882	93	85	20.3558	0.59802	0.463722	0.783881	0.438086	0.775429	18	15	1.66762	-2.03997		0.221225	-1.22328	31	11	1.06061	0.248869	0.956309	0.814483	0.234646	50	38	1.13296	-0.553077		0.625431	-0.488168	54	45	1.04432	0.135597		0.896691	0.129843	109	107	1.28155	-2.48208		0.0527716
CNAG_00295	0	0	4.89222	-0.183749		0.970039	-0.0375594	1	1	0.0452593	4.99758	0.349167		0.944299	0.0698673	0	0	0.776509	1.42333	0.232717	0.0668056	1.83298	0	0	0.756823	0.592232	0.8158	0.433907	0.782524	0	0	0.803259	-0.123081	0.950352	0.87822	-0.153227	1	1	0.732737	0.840064	0.485668	0.251599	1.14647	4	0	0.727881	0.608363	0.747423	0.403268
CNAG_00299	2	11	0.879169	0.995682	0.999845	0.257413	1.13253	57	67	7.89574	0.991003	0.228084	0.949483	0.817972	0.230155	10	1	1.04986	-0.295092		0.778652	-0.281076	3	6	0.869003	0.0280745	0.99363	0.974228	0.0323066	20	16	0.895264	-0.215028		0.810188	-0.240184	35	33	0.83055	0.240946	0.895289	0.771736	0.290104	64	64	0.811094	0.278567	0.911834	0.731263
CNAG_00300	8	25	0.656908	0.182037	0.999845	0.781694	0.277113	82	113	15.3643	0.7106	0.209681	0.937295	0.767936	0.295076	13	12	1.13829	-1.1496		0.312526	-1.00994	13	7	0.866798	-0.0179353	0.996393	0.983492	-0.0206915	46	36	0.850855	0.401355		0.637135	0.471708	56	61	0.821251	0.785196	0.578547	0.339023	0.956098	99	94	0.813724	0.717271	0.726698	0.378065
CNAG_00301	6	93	0.739797	0.697887	0.999845	0.345502	0.94335	249	378	36.8049	0.763397	0.193122	0.944401	0.800286	0.252976	36	22	1.1428	-0.243019		0.831598	-0.212652	43	29	1.01037	-0.297614	0.94877	0.76833	-0.29456	171	138	1.07464	-0.871049		0.417626	-0.810546	206	116	0.959817	0.0940957		0.921904	0.098035	347	294	0.931736	0.410592	0.874544	0.659449
CNAG_00302	4	7	0.856078	1.35194	0.999845	0.114283	1.57923	65	95	15.607	0.876854	2.4765	0.0609903	0.00473832	2.82431	18	23	1.82289	-2.86159		0.116458	-1.56981	14	6	1.21684	0.486392	0.93703	0.689364	0.399718	110	61	1.2384	0.28543		0.817717	0.230482	35	23	1.29588	-0.799026		0.537505	-0.616591	50	46	1.16205	0.818784		0.481056
CNAG_00303	1	0	1.98052	1.36173	0.999845	0.49173	0.687561	7	11	1.54472	2.1347	1.65851		0.437199	0.776932	2	1	2.07591	0.548051		0.791776	0.264005	0	2	1.58196	5.32641	0.00901506	0.000760018	3.36696	7	4	1.64579	2.56466		0.119157	1.55832	2	3	1.68038	1.50108	0.613121	0.371697	0.8933	2	7	1.61221	2.55434	0.419981	0.113109
CNAG_00304	3	3	1.10655	-0.378123	0.999845	0.732566	-0.341714	15	14	5.69932	1.14438	1.51233	0.544904	0.186326	1.32152	6	7	2.79634	-1.08531		0.69793	-0.388117	7	3	2.54138	-0.219821		0.931072	-0.0864967	8	0	2.80022	-2.20945		0.430096	-0.789028	8	7	2.80659	-2.68978		0.33787	-0.958382	14	16	2.64177	-2.02915		0.442427
CNAG_00305	22	85	0.410995	0.362877	0.999845	0.377278	0.882922	329	360	42.233	0.464029	-0.677966	0.487828	0.144004	-1.46104	35	12	2.59401	-0.498015		0.847753	-0.191987	17	10	2.61792	-1.67123		0.523226	-0.638381	180	173	2.39889	-0.337654		0.888064	-0.140754	176	212	2.31812	-0.0395398		0.986391	-0.0170568	420	460	2.32606	-0.544662		0.814864
CNAG_00306	2	10	1.21172	0.663865	0.999845	0.583781	0.54787	49	42	3.81365	1.44139	-1.15004	0.775428	0.424948	-0.797866	4	0	1.92853	2.391		0.215048	1.2398	6	1	1.88365	1.66893	0.782516	0.375612	0.88601	17	21	1.85976	2.10652		0.257345	1.13269	25	15	1.86059	1.59524		0.391233	0.857384	33	48	1.79758	2.88472		0.108543
CNAG_00307	12	26	0.613654	-0.627438	0.999845	0.306562	-1.02246	68	71	14.6541	0.684482	-0.472214	0.819609	0.490266	-0.689886	17	5	6.76668	0.581073		0.931568	0.0858726	8	6	6.69734	1.67109		0.802963	0.249515	23	26	6.75493	0.797908		0.905971	0.118122	63	58	6.76668	-1.04608		0.877142	-0.154593	73	102	6.76668	-1.45049		0.830268
CNAG_00308	3	19	0.710978	0.450442	0.999845	0.526373	0.633553	66	75	11.6435	0.794863	0.180376	0.950221	0.820481	0.226927	14	3	2.07626	1.26782		0.541447	0.610626	18	3	2.04321	0.37236		0.855393	0.182242	26	19	2.19919	-0.727551		0.740776	-0.330826	34	44	2.1922	-1.18443		0.588997	-0.540291	106	89	2.36459	-2.48632		0.293037
CNAG_00309	16	32	0.573217	-0.378468	0.999845	0.509092	-0.660252	114	100	20.9109	0.609713	0.197624	0.93139	0.745843	0.324126	31	13	0.774678	0.0467904	0.969077	0.951837	0.0603998	10	16	0.678725	0.809556	0.663653	0.232964	1.19276	65	56	0.676089	1.02299	0.402413	0.130255	1.5131	57	62	0.75318	-1.29644	0.24472	0.0851992	-1.72128	145	113	0.661174	0.984801	0.461757	0.136363
CNAG_00310	1	8	0.92545	0.503206	0.999845	0.586619	0.543742	35	25	5.73382	1.02343	0.787652	0.786512	0.441527	0.769618	7	3	0.98099	0.0273817		0.977732	0.0279123	3	1	0.859878	0.125228	0.975294	0.884209	0.145635	16	14	0.838554	0.605685	0.740371	0.470112	0.722297	21	13	0.803515	1.09363	0.386079	0.173497	1.36105	23	41	0.802187	0.741141	0.707265	0.355538
CNAG_00311	2627	14528	0.385407	0.256922	0.999845	0.505012	0.666624	53687	39604	7737.6	0.385629	0.216488	0.866426	0.574532	0.561389	6986	4616	0.653857	1.70975	0.0853736	0.00892639	2.61486	6492	3286	0.658134	-3.14214	2.98117e-05	1.80318e-06	-4.77432	20924	17899	0.654475	-0.808749	0.522371	0.216562	-1.23572	29275	32595	0.654913	-1.83894	0.0316697	0.00498633	-2.80792	68699	66382	0.671201	-5.88646	9.51375e-17	1.786e-18
CNAG_00312	2	5	0.980105	0.669692	0.999845	0.494426	0.683286	24	35	8.32294	1.02104	1.95227	0.306171	0.0558719	1.91203	7	10	3.02924	0.504977		0.867605	0.166701	4	5	3.0492	-0.664957		0.82737	-0.218076	9	15	2.8163	1.18312		0.674414	0.420097	12	29	3.0387	-1.09952		0.717473	-0.361838	41	37	2.76771	1.07896		0.696655
CNAG_00313	2	6	1.07917	0.544087	0.999845	0.614141	0.504172	33	28	4.52932	1.19123	0.458182	0.918958	0.700511	0.38463	3	4	0.697333	0.00124057	0.998892	0.998581	0.00177902	7	1	0.627091	-0.161448	0.953163	0.796827	-0.257455	41	30	0.661979	-0.678109	0.614104	0.305662	-1.02437	28	18	0.662429	-1.17641	0.226012	0.0757489	-1.7759	27	44	0.615939	-0.726544	0.594517	0.238171
CNAG_00314	4	21	0.643814	-0.145701	0.999845	0.820961	-0.226309	60	49	11.8654	0.692724	0.711752	0.684554	0.3042	1.02747	16	10	1.32756	2.26973		0.0873215	1.7097	17	11	1.32093	1.14297	0.7891	0.386887	0.865277	20	25	1.33765	1.02152		0.445066	0.763667	35	26	1.23501	2.61332		0.034342	2.11603	42	62	1.23252	2.31968	0.298773	0.0598273
CNAG_00315	12	158	0.678547	0.740322	0.999845	0.275256	1.09104	574	546	49.693	0.723001	-1.33985	0.327673	0.0638568	-1.85318	29	9	0.958652	2.24482	0.129141	0.0191991	2.34164	45	30	1.00912	0.0885567	0.985461	0.93007	0.0877566	280	241	0.960277	1.06802	0.573883	0.266054	1.1122	286	232	0.944781	1.00362	0.524582	0.288111	1.06227	712	630	0.928509	1.24602	0.521546	0.17961
CNAG_00316	9	28	0.789195	-0.339519	0.999845	0.667043	-0.430209	85	69	18.0049	0.856569	-0.52812	0.847915	0.53753	-0.616553	4	11	1.04256	-1.5844	0.330267	0.128582	-1.51972	12	1	0.689974	0.178627	0.953079	0.79572	0.25889	40	26	0.678314	0.548058	0.700098	0.419108	0.80797	50	73	0.650391	1.03909	0.288895	0.110123	1.59764	118	145	0.65115	0.59631	0.710303	0.359782
CNAG_00317	2	18	0.913772	0.118772	0.999845	0.896582	0.12998	48	48	7.8664	0.986451	0.246673	0.945492	0.80254	0.250061	9	5	0.892455	-1.05963	0.451601	0.235103	-1.18732	2	0	0.721472	-0.109725	0.97317	0.879119	-0.152086	20	17	0.775837	-1.03544	0.477912	0.182004	-1.33461	18	33	0.699127	0.215124	0.888034	0.758308	0.307704	77	58	0.687132	0.414507	0.82002	0.546347
CNAG_00318	9	37	0.657928	-0.625595	0.999845	0.341677	-0.950857	89	59	21.817	0.677008	0.923802	0.526543	0.172399	1.36454	25	27	1.50903	1.37528		0.3621	0.911371	24	10	1.4591	0.810656	0.900403	0.578493	0.555587	45	51	1.46801	0.766194		0.601721	0.521928	63	50	1.50465	-0.208186		0.889954	-0.138362	92	80	1.4109	1.13109		0.422738
CNAG_00319	12	44	0.533603	-0.112944	0.999845	0.83237	-0.211663	156	107	21.4845	0.608039	-0.676485	0.64741	0.265894	-1.11257	19	6	0.672188	0.538372	0.613532	0.423175	0.800924	14	5	0.645879	-0.0172839	0.995003	0.978651	-0.0267603	39	82	0.63088	0.652959	0.61392	0.30067	1.035	93	104	0.648373	-0.497702	0.674351	0.442715	-0.767617	157	203	0.622891	0.166088	0.933353	0.789746
CNAG_00320	2	6	0.904329	-0.418044	0.999845	0.643888	-0.46227	16	15	6.16867	0.956057	1.29075	0.533668	0.176991	1.35008	10	4	1.23551	-0.694872		0.573831	-0.562419	8	2	1.03762	-0.441877	0.932147	0.670212	-0.425857	38	28	1.04123	-0.398485		0.701938	-0.382705	18	13	1.01862	-0.614613		0.546255	-0.603381	27	16	0.97687	-0.332217	0.912958	0.733794
CNAG_00321	0	2	1.65733	-0.0409276	0.999845	0.980298	-0.0246949	3	6	2.48453	1.70723	2.16989		0.203728	1.271	2	3	1.43301	0.165305		0.908164	0.115355	1	0	1.3085	0.326277		0.803089	0.249351	5	5	1.47276	-1.24337		0.398532	-0.844246	2	0	1.42068	-1.36636		0.336169	-0.961763	7	4	1.42884	-1.8343		0.199221
CNAG_00322	0	11	1.27514	-0.250663	0.999845	0.844158	-0.196577	18	18	3.51737	1.44517	-0.436054	0.935637	0.762856	-0.301733	2	2	1.75489	-1.03756		0.55436	-0.59124	1	1	1.13427	3.15858	0.0530686	0.00535825	2.78467	12	13	1.76211	-2.16455		0.219302	-1.22839	12	12	1.19441	0.827373		0.488496	0.692702	26	27	1.29218	-0.7736	0.821743	0.549387
CNAG_00323	2	1	2.02513	0.968818	0.999845	0.632367	0.478399	12	34	1.91684	2.38724	-1.43597		0.547497	-0.601516	0	1	0.552527	0.177515	0.859917	0.747999	0.321279	1	1	0.496668	0.816436	0.455476	0.100212	1.64383	10	8	0.526578	-0.335762	0.784498	0.523714	-0.63763	2	0	0.620564	-2.4466	0.000792728	8.06195e-05	-3.94255	5	0	0.495293	0.101586	0.948874	0.837492
CNAG_00326	28	50	0.577775	-0.393692	0.999845	0.495623	-0.681393	192	170	33.277	0.61674	-0.554967	0.73705	0.368206	-0.899839	37	10	2.36494	-0.483505		0.838004	-0.204447	21	3	2.04293	0.578173		0.777167	0.283012	86	59	2.18284	-0.546852		0.802183	-0.250523	112	128	2.1086	-0.511682		0.808266	-0.242664	272	286	2.01041	0.274731		0.891304
CNAG_00327	3	6	1.09776	-0.969556	0.999845	0.377119	-0.883217	12	14	3.36204	1.21326	-0.100439	0.986272	0.934023	-0.0827846	3	3	1.80395	-3.17838		0.0780871	-1.76189	3	3	1.18431	0.227968	0.965366	0.847358	0.192491	18	10	1.30124	-0.874464		0.501569	-0.672023	12	2	1.23279	-0.776913		0.528561	-0.630205	9	17	1.22866	-1.13819	0.705811	0.354256
CNAG_00328	7	36	0.603962	0.150808	0.999845	0.802821	0.249698	120	108	24.6275	0.629666	1.02041	0.419993	0.105113	1.62056	37	19	0.528516	-0.553912	0.515156	0.294614	-1.04805	14	6	0.466862	-0.0249016	0.98957	0.957462	-0.0533383	49	54	0.458838	0.55993	0.527368	0.222343	1.22032	68	79	0.449725	0.898317	0.160823	0.045773	1.99748	147	111	0.450329	0.419109	0.704785	0.352023
CNAG_00329	5	40	0.745341	0.267173	0.999845	0.720002	0.358457	119	119	17.5526	0.901958	-1.69379	0.31839	0.0603943	-1.8779	8	1	0.583818	-0.182589	0.863947	0.754471	-0.312749	13	9	0.501683	0.0908168	0.969471	0.856348	0.181024	48	45	0.489992	0.561076	0.561619	0.25218	1.14507	69	76	0.476038	0.685748	0.352485	0.149717	1.44053	149	133	0.470355	0.628208	0.523645	0.181678
CNAG_00330	0	10	1.03042	1.57562	0.999845	0.126239	1.5291	41	82	14.3157	1.06584	2.17345	0.257692	0.0414323	2.03918	14	10	1.20868	-0.696941		0.564202	-0.576612	13	4	0.94139	0.516761	0.902146	0.58305	0.548934	48	47	1.02665	-0.577971		0.573455	-0.56297	26	26	1.0002	-0.785846		0.432051	-0.785686	32	27	0.911624	0.478321	0.848681	0.599798
CNAG_00331	3	3	1.31331	-2.69364	0.572116	0.0402641	-2.05103	4	2	3.30921	1.3228	0.197852	0.969257	0.881103	0.149571	4	2	1.47409	1.17421		0.425701	0.796571	1	1	1.282	2.16179	0.432387	0.0917448	1.68627	2	3	1.3844	0.737649		0.594152	0.532829	3	0	1.34202	0.711385		0.596053	0.530085	5	1	1.29223	1.11569	0.733921	0.387927
CNAG_00332	4	8	0.951866	-1.1366	0.999845	0.232449	-1.19407	19	12	6.38428	0.992259	0.760829	0.787504	0.443221	0.766765	14	3	1.02791	1.40306		0.172262	1.36497	9	11	0.995758	0.758513	0.824009	0.446213	0.761744	3	4	1.25193	-1.5972		0.202031	-1.27579	11	18	0.974179	0.917797	0.585559	0.34613	0.942123	21	24	0.959801	1.0501	0.632367	0.27392
CNAG_00333	4	6	0.959764	-0.200581	0.999845	0.834456	-0.20899	32	20	8.14335	0.986526	1.63029	0.408299	0.0984202	1.65256	10	12	5.38218	-0.869682		0.871632	-0.161586	4	1	5.38218	-2.08743		0.698134	-0.387841	13	15	5.30987	0.140667		0.978865	0.0264917	16	17	5.38218	-2.49685		0.642711	-0.463911	32	25	5.25544	0.0656795		0.990029
CNAG_00334	279	997	0.324433	0.0916091	0.999845	0.777662	0.282367	3392	3544	556.516	0.329818	-0.521796	0.432336	0.113633	-1.58207	499	158	0.787884	-1.35554	0.262746	0.0853438	-1.72049	315	183	0.568501	0.441689	0.817922	0.437196	0.776936	1632	1367	0.558399	0.986528	0.311709	0.0772769	1.76671	2029	2176	0.546485	1.26552	0.0943407	0.0205718	2.31575	4276	4370	0.547216	0.798107	0.476551	0.144706
CNAG_00335	10	11	1.04093	-0.203496	0.999845	0.845007	-0.195493	57	69	11.0797	1.09693	-0.219198	0.955718	0.841615	-0.199828	7	8	0.640393	0.173652	0.874359	0.786264	0.271165	7	6	0.598212	-0.117585	0.963652	0.844171	-0.196561	36	27	0.569566	1.22174	0.183414	0.0319503	2.14503	62	52	0.561875	1.34531	0.0804818	0.0166508	2.39433	77	94	0.560696	1.0634	0.292888	0.0578852
CNAG_00336	2	16	0.655363	0.0563628	0.999845	0.931465	0.0860024	48	40	20.8054	0.66235	2.61592	0.00172281	7.83308e-05	3.94945	40	27	0.564333	-1.92022	0.0215984	0.000667365	-3.40265	12	12	0.554457	1.0316	0.343722	0.0628075	1.86055	25	15	0.557184	-1.38606	0.10222	0.0128606	-2.48761	33	31	0.554873	-0.150458	0.902894	0.786269	-0.271159	61	34	0.55452	0.0794221	0.968851	0.886111
CNAG_00337	19	133	0.432937	0.694811	0.999845	0.10852	1.60488	558	540	83.3874	0.448871	0.663707	0.478341	0.139244	1.47861	101	46	0.721938	0.945982	0.3994	0.190082	1.31034	105	36	0.653535	1.48132	0.17726	0.0234133	2.26662	269	239	0.728348	-0.283524	0.872247	0.697076	-0.38927	306	231	0.659699	0.81197	0.446657	0.218391	1.23082	580	479	0.65542	0.587139	0.718831	0.370349
CNAG_00342	2	14	0.964792	0.0714556	0.999845	0.94096	0.0740632	39	38	9.86174	1.05299	0.151171	0.970898	0.885846	0.143563	2	7	1.51323	-2.01417		0.183175	-1.33104	21	6	1.18114	-0.935153	0.812783	0.428514	-0.791737	28	28	1.30838	-2.09348		0.109588	-1.60005	34	37	1.20639	-1.67313		0.165475	-1.38689	64	42	1.21783	-2.20946		0.069638
CNAG_00343	5	14	0.741936	-0.262152	0.999845	0.723837	-0.353336	44	40	7.39434	0.910599	-0.921178	0.692041	0.311721	-1.01162	4	3	1.62827	-2.62967		0.106308	-1.61501	5	5	0.925328	1.60394	0.407662	0.0830293	1.73337	27	22	1.16147	-1.79471		0.122295	-1.54521	23	33	1.06023	-1.50484		0.155796	-1.41935	54	61	1.35938	-3.63585	0.0634268	0.00748117
CNAG_00344	2	12	0.852676	-0.301695	0.999845	0.723473	-0.353822	30	24	6.78083	0.928384	0.523348	0.865875	0.572945	0.56372	6	6	0.944476	0.882372		0.350178	0.934244	4	1	0.939259	-0.268723	0.94877	0.774801	-0.286101	15	9	0.924657	-0.00377919		0.996739	-0.00408712	13	14	0.858708	0.762504	0.615715	0.374559	0.887966	25	20	0.883014	-0.227954	0.934449	0.796288
CNAG_00345	17	34	0.61253	-0.437829	0.999845	0.47474	-0.714788	115	105	21.2728	0.697785	-1.12693	0.422691	0.106308	-1.61501	11	7	0.998387	-0.830256		0.405636	-0.831598	11	4	0.917675	-1.10899	0.657158	0.226863	-1.20848	75	67	0.90598	-0.820905		0.364885	-0.906096	88	89	0.90598	-1.31958	0.347672	0.145249	-1.45652	162	223	0.903545	-1.68104	0.307295	0.0628157
CNAG_00346	3	6	0.909824	0.448655	0.999845	0.621926	0.493123	34	34	5.17123	1.107	-0.40464	0.921376	0.714716	-0.36553	3	2	1.94523	-2.05245		0.29137	-1.05512	7	1	1.72213	-2.2176		0.197847	-1.28771	20	12	1.69347	-1.99248		0.239369	-1.17656	18	14	1.56378	-1.62119		0.299869	-1.03671	24	36	1.53967	-1.80063		0.242206
CNAG_00347	12	43	0.648214	-0.563291	0.999845	0.384853	-0.868989	80	109	23.0582	0.68594	-0.0205203	0.994371	0.976134	-0.0299156	36	6	0.679862	-0.171742	0.878801	0.800567	-0.252614	12	4	0.577676	0.387424	0.857684	0.502437	0.67066	53	42	0.583317	0.311994	0.828036	0.592746	0.534861	33	31	0.548861	1.31853	0.0791037	0.016292	2.40231	113	99	0.548061	0.973111	0.343939	0.0758066
CNAG_00348	3	3	1.23243	-0.705369	0.999845	0.567092	-0.572339	17	7	3.79363	1.37945	-0.155808	0.976752	0.910071	-0.112949	4	1	0.952117	0.187148	0.904591	0.844172	0.19656	0	2	0.855444	0.0377651	0.991063	0.964787	0.0441467	13	6	0.879956	-0.216773	0.913919	0.805415	-0.246345	8	7	0.801478	0.783221	0.566744	0.32846	0.977221	27	12	0.798627	0.470717	0.825221	0.555588
CNAG_00349	1	3	1.26274	-0.120159	0.999845	0.92419	-0.0951575	8	11	4.01834	1.28113	2.38826	0.323127	0.062296	1.86418	13	3	0.50678	1.96932	0.00628042	0.000101929	3.88595	11	4	0.503014	0.917693	0.361045	0.0680935	1.82439	6	12	0.499593	1.20339	0.119126	0.0160078	2.40874	7	8	0.496511	0.892518	0.218767	0.0722436	1.79758	13	17	0.485857	1.42754	0.0309838	0.00330142
CNAG_00351	3	4	1.30611	-0.816448	0.999845	0.531906	-0.625099	16	9	3.8745	1.46378	-0.467275	0.932679	0.749556	-0.319225	2	2	2.25084	0.589704		0.793327	0.261993	4	0	2.16213	0.0468319		0.982719	0.02166	4	7	2.4138	-1.46707		0.543329	-0.607786	9	8	2.16602	-0.393152		0.855968	-0.181509	20	25	2.1788	-0.914751		0.6746
CNAG_00352	3	17	0.960075	-0.165655	0.999845	0.86301	-0.172544	28	55	8.74871	1.04245	-0.0864473	0.986272	0.933909	-0.0829271	3	7	1.27403	-1.24377	0.540387	0.328942	-0.976247	9	0	1.20221	1.21689	0.745968	0.311437	1.01221	25	29	1.21889	-0.568988	0.856715	0.640638	-0.466807	37	32	1.29044	-3.17143	0.0707858	0.0139858	-2.45763	58	53	1.20295	0.253817	0.947066	0.83289
CNAG_00353	1	22	0.862593	1.84431	0.478999	0.0325088	2.1381	115	223	19.6781	0.925734	0.581055	0.842345	0.53022	0.62767	10	8	1.59837	1.10748		0.488384	0.692881	10	4	1.48486	0.872442	0.889149	0.556828	0.587559	82	62	1.55342	0.299947		0.84689	0.193089	52	18	1.48236	0.493545		0.739175	0.332946	22	25	1.40764	1.42963		0.30981
CNAG_00354	8	49	0.512535	0.429303	0.999845	0.402251	0.837609	196	162	28.9512	0.561416	0.107801	0.956733	0.84773	0.192016	24	14	2.45987	-2.44404		0.320434	-0.993567	18	5	2.11895	-0.215486		0.918999	-0.101695	87	75	2.42173	-2.19501		0.364733	-0.906383	125	111	2.06725	0.163419		0.936992	0.0790513	225	229	2.26416	-2.18197		0.335198
CNAG_00355	7	19	0.674788	-0.327339	0.999845	0.627606	-0.485098	61	50	13.2206	0.747186	-0.0319489	0.992786	0.965894	-0.042759	14	5	1.01312	1.57956		0.118972	1.5591	7	3	1.08138	-0.3936	0.942476	0.715872	-0.363981	25	17	1.0354	0.157233		0.8793	0.151857	45	47	0.972035	0.67619		0.486652	0.695643	60	73	0.993403	-0.145138	0.967968	0.883841
CNAG_00356	9	54	0.575676	0.210672	0.999845	0.714398	0.365955	176	161	24.2742	0.635187	-0.448524	0.812083	0.480109	-0.706128	25	6	1.41318	-1.03189		0.465275	-0.730189	16	10	1.04802	0.65343	0.874934	0.532961	0.623492	104	79	1.18928	-0.961737		0.418703	-0.808674	100	90	1.39818	-2.5857		0.0644086	-1.84934	240	225	1.0747	-0.642941	0.821743	0.549672
CNAG_00357	3	13	0.722464	1.61318	0.39377	0.0255567	2.23288	109	133	11.6354	0.916626	-0.691234	0.794024	0.450785	-0.754106	6	1	1.16161	-1.26861		0.274784	-1.09211	11	10	0.855625	0.189814	0.958744	0.824436	0.221843	64	55	0.877668	-0.128858		0.883275	-0.146819	27	19	0.875483	-0.588929	0.714859	0.501144	-0.67269	37	38	0.826192	0.175938	0.946767	0.831365
CNAG_00358	3	11	0.906249	-0.443348	0.999845	0.624692	-0.489212	22	30	6.72437	0.961782	0.719176	0.794833	0.454609	0.747754	6	8	0.561265	-0.75855	0.38373	0.176535	-1.3515	7	1	0.456768	0.823811	0.370086	0.0712995	1.80356	15	14	0.490248	-0.549658	0.570961	0.26221	-1.12118	10	13	0.471069	-0.374315	0.660322	0.426842	-0.794608	20	28	0.460985	-0.262696	0.832653	0.568774
CNAG_00359	3	3	1.16709	-1.00689	0.999845	0.388279	-0.862742	10	9	4.11974	1.51431	-1.31663	0.747477	0.384595	-0.86946	1	1	2.93898	1.9475		0.507558	0.662645	3	0	2.74008	2.28277		0.404787	0.833103	3	1	2.97316	-0.551646		0.852804	-0.185542	7	4	2.70546	2.30215		0.394808	0.85093	8	6	2.81654	0.824601		0.769698
CNAG_00360	5	11	0.743575	0.623331	0.999845	0.401868	0.83829	78	58	9.1093	0.981566	-1.2329	0.576156	0.209097	-1.25605	3	2	1.06501	2.72172	0.0946124	0.0106011	2.55558	8	2	1.04209	2.03809	0.300334	0.0504927	1.95577	37	28	1.05712	1.7544	0.350824	0.0969965	1.65959	22	34	1.03275	1.91686	0.20045	0.0634423	1.85608	53	57	1.01775	2.12567	0.218337	0.0367444
CNAG_00361	7	24	0.547593	0.660213	0.999845	0.227947	1.20566	142	109	18.8421	0.588595	0.942521	0.425642	0.109309	1.60131	27	14	0.816535	-0.489126	0.714661	0.549156	-0.599026	16	5	0.806163	-0.0441966	0.989319	0.956279	-0.0548234	50	50	0.812534	-1.17955	0.426238	0.146587	-1.45169	78	80	0.805658	-0.272192	0.876767	0.735476	-0.33785	145	157	0.804083	0.00838712	0.99709	0.991678
CNAG_00362	5	25	0.61959	-0.0584625	0.999845	0.924826	-0.0943568	64	75	13.065	0.671783	0.480903	0.809735	0.474078	0.71586	20	8	0.942786	1.66946	0.250176	0.0765987	1.77077	19	5	0.861058	2.50109	0.0380258	0.00367641	2.90467	40	30	0.919229	0.911127	0.625045	0.321594	0.991187	41	48	0.888449	1.08565	0.450466	0.221721	1.22196	86	84	0.872363	1.19257	0.513901	0.171607
CNAG_00363	17	128	0.61037	0.528412	0.999845	0.386642	0.865723	458	448	61.5825	0.623299	0.592756	0.717106	0.341605	0.950998	61	55	0.76729	1.69642	0.149718	0.0270408	2.21093	70	46	0.765604	0.51001	0.860029	0.505313	0.666154	219	209	0.766708	0.575279	0.726315	0.45306	0.750323	274	231	0.759756	0.248785	0.879424	0.743325	0.327454	514	443	0.740809	0.433483	0.827666	0.558448
CNAG_00364	4	6	0.887318	0.586717	0.999845	0.508468	0.661226	39	49	7.51492	0.957846	0.886267	0.726309	0.354825	0.925272	8	6	0.667203	0.939102	0.364487	0.159273	1.40752	4	1	0.618765	1.23277	0.283914	0.0463374	1.99231	23	17	0.625069	1.0293	0.356219	0.0996196	1.6467	28	21	0.620688	0.733044	0.470483	0.237596	1.18102	51	37	0.610454	0.95115	0.42969	0.119209
CNAG_00365	7	41	0.59733	-0.054675	0.999845	0.92707	-0.0915324	119	97	15.4811	0.68216	-0.684047	0.695552	0.315974	-1.00277	13	6	1.0692	0.00999603		0.992541	0.0093491	11	3	0.848462	1.43499	0.430276	0.0907823	1.69129	47	39	1.16552	-1.6326		0.161288	-1.40075	61	52	0.932908	-0.477835	0.795917	0.608511	-0.5122	88	99	0.858169	0.359624	0.88319	0.675173
CNAG_00366	0	0	2.39502	1.14204	0.999845	0.633475	0.476841	2	3	1.00678	2.46516	3.28868		0.182183	1.33406	2	1	0.679083	0.254903	0.833333	0.70739	0.375364	1	0	0.602404	0.696157	0.679918	0.247832	1.15563	0	2	0.741532	-1.5755	0.18833	0.0336149	-2.12466	3	2	0.617572	-0.197938	0.882969	0.748582	-0.32051	1	2	0.60164	-0.0831098	0.970423	0.890131
CNAG_00367	0	7	1.19499	1.39716	0.999845	0.242331	1.16918	34	43	6.33548	1.25931	1.63989	0.553666	0.192846	1.30221	5	6	3.78012	1.93352		0.609002	0.511498	3	6	3.80515	-0.636671		0.86712	-0.167318	27	14	3.80515	-0.551644		0.884732	-0.144973	13	5	3.78735	0.331485		0.930255	0.0875243	19	7	3.62326	1.51935		0.674974
CNAG_00368	2	19	0.762284	0.277767	0.999845	0.715568	0.364388	50	64	10.0537	0.86149	-0.0374331	0.992582	0.965342	-0.0434516	7	5	1.00762	-0.309099		0.759025	-0.306761	5	3	0.86503	-0.0662242	0.987676	0.938976	-0.076557	17	24	0.838398	0.524224		0.531795	0.625268	24	24	0.809095	0.862062	0.523726	0.286666	1.06546	40	57	0.813557	0.296418	0.903169	0.715598
CNAG_00369	3	8	0.945407	-0.296215	0.999845	0.754038	-0.31332	31	17	4.60893	1.06002	0.0357796	0.993906	0.973074	0.0337537	5	3	1.80094	-1.46707		0.415294	-0.814614	2	1	1.35023	-0.363357	0.950745	0.787847	-0.269107	12	8	1.28985	0.40066		0.756085	0.310625	30	9	1.26993	0.207499		0.870208	0.163394	27	35	1.21728	1.12691		0.354572
CNAG_00370	65	325	0.328578	0.225037	0.999845	0.493418	0.684883	1141	1010	182.092	0.339955	0.122919	0.92279	0.717669	0.361576	199	80	2.96891	-1.09461		0.712358	-0.368691	115	46	2.83764	-1.33569		0.637851	-0.470705	469	454	2.97251	-2.21852		0.455459	-0.746346	605	672	2.72957	-0.622991		0.819462	-0.228237	1471	1220	2.96191	-2.93517		0.3217
CNAG_00371	4	4	1.13685	-1.1351	0.999845	0.318055	-0.998464	13	11	4.25516	1.39071	-1.24898	0.737471	0.369138	-0.898088	2	1	1.59045	-2.25783		0.15572	-1.41962	3	0	0.883228	1.07973	0.649933	0.221527	1.22248	13	6	1.1147	-1.46361		0.189178	-1.31301	7	4	0.979683	-0.911309		0.352263	-0.930208	13	11	0.956352	-1.04977	0.629743	0.272345
CNAG_00372	5	23	0.646214	0.085068	0.999845	0.895269	0.131641	69	76	15.7826	0.685106	0.894718	0.551293	0.191568	1.30596	22	12	0.830533	-1.55901	0.218294	0.0605009	-1.87713	22	7	0.55847	0.383314	0.850845	0.492483	0.686365	26	29	0.545027	1.00379	0.281157	0.0655147	1.84173	22	31	0.531052	1.34887	0.0595226	0.0110853	2.54	62	65	0.529377	1.08495	0.231576	0.040414
CNAG_00373	4	12	0.768686	0.33155	0.999845	0.666235	0.431321	47	58	7.32447	0.873264	0.0363912	0.992786	0.96676	0.0416726	9	3	0.972654	-0.0611563		0.949866	-0.0628756	4	1	0.906283	-0.643946	0.842021	0.477372	-0.710536	22	17	0.943381	-0.940959		0.318555	-0.997433	38	22	0.881033	-0.74149	0.637218	0.400004	-0.841614	53	52	0.81372	0.219321	0.933327	0.787523
CNAG_00374	3	9	0.820646	0.617385	0.999845	0.451861	0.752315	53	43	8.83918	0.900385	0.737702	0.767959	0.412605	0.819318	12	3	0.9223	-0.0610272		0.947244	-0.0661684	10	1	0.808024	-0.0833189	0.982864	0.917872	-0.103114	86	65	0.821432	-0.190948		0.816183	-0.232457	59	28	0.801494	-0.393664	0.800926	0.623312	-0.491163	32	39	0.770233	-0.206062	0.933327	0.78906
CNAG_00375	8	16	0.636096	0.335657	0.999845	0.59772	0.527683	93	78	17.6552	0.68989	0.561742	0.770091	0.415503	0.814248	18	9	0.725403	0.23419	0.859917	0.746815	0.322841	12	6	0.660655	0.167941	0.953814	0.799338	0.254203	51	37	0.664077	0.17333	0.911552	0.794086	0.261009	50	62	0.93937	-3.06437	0.0086226	0.00110567	-3.26216	87	86	0.645379	-0.189244	0.927315	0.769347
CNAG_00376	4	15	0.871619	0.785492	0.999845	0.367489	0.901187	48	116	97.7878	0.949756	0.173134	0.959384	0.855352	0.182294	3	9	0.46499	0.714765	0.324953	0.124254	1.53716	18	10	0.508096	-2.33767	6.72728e-05	4.20789e-06	-4.60084	26	50	0.500392	-2.03902	0.00187843	4.60453e-05	-4.07484	27	10	0.502886	-2.60705	5.0397e-06	2.16976e-07	-5.18417	15	8	0.49553	-2.79772	2.62553e-07	1.64295e-08
CNAG_00377	31	134	0.383127	-0.786109	0.571942	0.0401866	-2.05183	236	232	306.227	0.396548	0.503976	0.567662	0.203761	1.27091	93	57	0.581334	0.0504871	0.956035	0.930793	0.086847	106	61	0.542203	0.531143	0.754968	0.327283	0.979602	137	106	0.565193	-0.58138	0.61392	0.30365	-1.02864	140	121	0.58213	-1.60496	0.0357535	0.00583272	-2.75704	271	277	0.542818	-0.321504	0.823607	0.553659
CNAG_00378	1	1	1.41361	0.218425	0.999845	0.877203	0.154516	5	8	24.2379	1.36279	6.3862	7.50264e-05	2.78445e-06	4.68611	38	65	1.0113	1.6253	0.304431	0.108024	1.60714	8	2	1.00185	0.535768	0.905623	0.592804	0.534778	7	1	1.13233	-0.543151	0.853105	0.631458	-0.479676	1	4	0.975319	0.49716	0.796161	0.610233	0.509741	3	7	0.930065	1.05659	0.612702	0.255939
CNAG_00383	9	59	0.490906	0.57952	0.999845	0.237797	1.18051	229	238	31.6155	0.533125	0.168197	0.933168	0.752387	0.315493	33	15	1.22837	-1.13928	0.559599	0.353679	-0.927477	31	10	1.14119	0.810374	0.842021	0.477636	0.710111	126	86	1.19556	-1.66584	0.449266	0.163513	-1.39335	111	99	1.14452	0.0398325	0.989708	0.972237	0.0348027	222	215	1.13599	0.90804	0.762682	0.424095
CNAG_00384	2	3	1.40416	-1.44686	0.999845	0.302817	-1.03041	8	3	2.39302	1.56048	-0.250287		0.872573	-0.160391	1	2	0.981897	0.422367		0.667084	0.430153	2	1	0.887283	0.339269	0.938732	0.702188	0.382368	3	6	0.926083	-0.133196		0.885637	-0.143828	3	6	0.86717	0.318182	0.86411	0.713679	0.366919	10	5	0.857891	0.12976	0.964985	0.879775
CNAG_00385	17	49	0.469054	0.453066	0.999845	0.334087	0.965915	211	268	31.0637	0.515544	-0.0747765	0.970898	0.884676	-0.145044	30	15	6.76668	0.581073		0.931568	0.0858726	18	4	6.68266	1.94205		0.771349	0.290611	94	71	6.76668	-0.551636		0.935027	-0.0815223	100	103	6.76668	-1.04608		0.877142	-0.154593	229	260	6.76668	-1.45049		0.830268
CNAG_00386	26	105	0.459134	0.164486	0.999845	0.720154	0.358252	373	355	48.856	0.496083	-0.556669	0.640832	0.261808	-1.12213	48	15	2.10544	-1.85742		0.377669	-0.882199	22	19	1.61751	1.34497		0.405688	0.831507	155	107	2.05702	-1.59085		0.4393	-0.773376	168	222	1.69466	-0.0392125		0.981539	-0.0231389	450	465	1.60812	0.713315		0.657354
CNAG_00387	6	8	0.856532	0.280111	0.999845	0.743645	0.32703	47	58	7.33418	0.999824	-0.597741	0.852479	0.549942	-0.597847	6	2	2.33641	0.581085		0.803586	0.248709	4	0	1.84973	6.37477	0.00685708	0.000568248	3.44633	26	17	2.10193	1.88221		0.370537	0.895468	11	14	2.08514	1.49275		0.474054	0.715898	21	24	1.96817	2.06337		0.29447
CNAG_00388	3	13	0.878967	-0.252629	0.999845	0.773794	-0.287416	28	38	8.08984	0.936832	0.639972	0.821485	0.494528	0.683124	7	8	1.82604	-3.44657		0.0590987	-1.88746	6	1	1.2056	0.157542	0.979709	0.896032	0.130676	13	9	1.3879	-1.51565		0.274814	-1.09204	25	46	1.19655	-0.0787362		0.947535	-0.0658024	20	61	1.16496	0.299773		0.796927
CNAG_00389	5	6	0.85982	0.164037	0.999845	0.848698	0.190781	41	35	7.8912	0.91727	0.932512	0.689674	0.309336	1.01662	13	5	0.778596	-1.69107	0.156577	0.0298591	-2.17195	12	3	0.600896	-0.445379	0.829575	0.458577	-0.741191	35	27	0.584717	0.271162	0.857078	0.642827	0.463749	23	21	0.566279	1.04892	0.20097	0.0639812	1.85231	60	52	0.565985	0.675142	0.589501	0.232923
CNAG_00390	4	12	0.871695	0.0334011	0.999845	0.969435	0.0383174	44	42	8.22763	0.94145	0.401794	0.904954	0.669538	0.426782	10	5	0.863443	-0.981012	0.476831	0.255888	-1.13616	6	6	0.642958	1.77291	0.0569818	0.00582573	2.75743	20	16	0.64852	1.48576	0.144968	0.0219635	2.291	19	22	0.653691	0.690882	0.526552	0.29056	1.05689	43	40	0.653517	0.294015	0.872149	0.652785
CNAG_00391	1	15	1.04339	-1.1295	0.999845	0.279018	-1.08253	19	12	8.52922	1.04976	1.65086	0.436005	0.115811	1.5726	9	15	1.31809	-0.0121906		0.992621	-0.00924865	4	2	1.21876	-0.268657	0.958885	0.825533	-0.220434	45	42	1.38974	-1.60698		0.24755	-1.15632	35	34	1.31809	-1.6372		0.2142	-1.2421	26	35	1.15656	0.0818314		0.943593
CNAG_00392	0	6	1.85005	0.0619326	0.999845	0.973295	0.0334762	13	11	1.49118	2.26324	-1.63925		0.468885	-0.724294	1	0	2.76882	1.95229		0.48075	0.705097	2	0	2.62686	1.71595		0.513606	0.653233	3	2	2.77284	0.827649		0.765334	0.298484	5	5	2.63853	1.23235		0.640457	0.46706	5	17	2.61381	0.998167		0.702549
CNAG_00393	7	66	0.655476	0.507402	0.999845	0.438873	0.774098	203	238	24.2169	0.70429	-0.387389	0.873197	0.58229	-0.550042	26	8	1.28759	-0.0591864		0.963337	-0.045967	12	4	1.10663	0.365507	0.94877	0.741182	0.330289	134	109	1.32622	-1.40146		0.290635	-1.05673	128	105	1.12559	-0.310196		0.782867	-0.275585	294	230	1.05919	0.542235	0.852603	0.608698
CNAG_00394	8	9	0.981323	-1.05516	0.999845	0.282264	-1.07525	29	26	6.47313	1.28454	-2.36639	0.331375	0.0654437	-1.84222	2	1	1.3718	2.12562		0.121259	1.54951	2	0	1.53757	-0.700077	0.925514	0.648883	-0.455315	17	15	1.3627	1.14929		0.399012	0.843387	11	15	1.39786	0.107664		0.938607	0.0770206	27	31	1.33226	0.941884		0.479579
CNAG_00395	2	6	1.01564	0.261427	0.999845	0.796868	0.257402	27	23	3.6066	1.20358	-0.238051	0.955718	0.843213	-0.197785	4	1	1.04787	-1.97422	0.217221	0.0595606	-1.88403	5	6	0.67547	0.354076	0.909216	0.600145	0.524193	14	9	0.683625	0.209661	0.903742	0.759079	0.30669	13	16	0.654304	0.834949	0.423461	0.201925	1.27609	26	27	0.650282	0.675377	0.659808	0.298995
CNAG_00396	1	14	0.829775	0.156476	0.999845	0.850425	0.188576	36	38	9.4635	0.870912	1.36931	0.436005	0.115887	1.57227	15	8	0.900162	-1.84663	0.178502	0.0402241	-2.05144	9	3	0.58586	0.258463	0.929074	0.659092	0.441168	28	24	0.652801	-1.01917	0.383325	0.11847	-1.56123	21	21	0.573565	0.306219	0.788356	0.593419	0.533888	35	48	0.570617	0.0319361	0.994026	0.955368
CNAG_00397	0	5	1.34903	0.115085	0.999845	0.932015	0.0853096	10	13	2.77909	1.441	1.17289		0.415679	0.813941	3	3	3.40996	0.490347		0.88566	0.143798	1	0	3.2069	1.29984		0.685238	0.405325	4	3	3.43828	-1.99953		0.560871	-0.581549	9	6	3.21814	0.722404		0.822385	0.224479	5	5	3.24781	-0.0763931		0.981234
CNAG_00398	4	6	0.977689	0.225291	0.999845	0.817756	0.230433	37	33	8.25675	1.03177	1.02578	0.69919	0.320128	0.994195	5	9	2.88079	-0.497969		0.862762	-0.172859	7	2	2.90172	-1.66761		0.565497	-0.574695	13	10	2.86253	-1.41804		0.620332	-0.49538	14	18	2.5955	0.676784		0.794283	0.260753	19	46	2.64143	-0.542388		0.837308
CNAG_00399	3	11	0.98905	-0.0802364	0.999845	0.935343	-0.0811247	32	35	16.3988	0.993665	2.60062	0.0995689	0.00886544	2.6172	14	32	1.23593	-0.239595		0.846287	-0.193858	28	12	1.11354	-0.286431	0.953163	0.797005	-0.257225	13	18	1.4522	-2.46483		0.0896386	-1.69731	36	19	1.1046	-0.562792		0.610401	-0.509501	52	66	1.093	-0.782624	0.791386	0.473969
CNAG_00400	11	32	0.562419	-0.269749	0.999845	0.631496	-0.479622	101	88	18.0597	0.622515	-0.173828	0.939049	0.780065	-0.279235	23	6	1.7319	-3.18108		0.0662458	-1.83676	33	14	1.07271	0.205817	0.96568	0.847847	0.191867	39	46	1.01071	1.47571		0.14427	1.46007	63	88	1.0095	1.01006		0.317042	1.00056	149	155	0.999058	0.942407	0.700188	0.34553
CNAG_00401	3	7	0.957367	-0.404274	0.999845	0.672823	-0.422276	15	26	7.94002	0.991466	1.40535	0.503432	0.156352	1.41745	7	10	0.537436	0.785417	0.346402	0.143902	1.46141	3	3	0.51753	0.302456	0.889149	0.558936	0.584422	10	6	0.508716	0.902203	0.308785	0.0761476	1.77349	10	19	0.496988	1.50601	0.0171554	0.00244336	3.03027	24	23	0.496671	1.14477	0.144834	0.0211725
CNAG_00402	39	123	0.458135	0.142668	0.999845	0.755489	0.31141	492	449	69.2247	0.486678	-0.550505	0.637066	0.257993	-1.13115	65	19	0.898748	-2.80526	0.0367445	0.00180053	-3.1213	56	20	0.567152	-0.457884	0.80581	0.419472	-0.807338	219	170	0.641048	-1.93485	0.0406045	0.00254228	-3.01826	225	250	0.568907	-0.921885	0.279906	0.105136	-1.62045	583	568	0.557285	-0.865676	0.430893	0.120332
CNAG_00403	840	5783	0.668497	-0.0613132	0.999845	0.926922	-0.091718	21220	6404	1979.54	0.669156	-0.645577	0.712541	0.334663	-0.964763	1687	798	0.834775	-1.62517	0.201192	0.0515539	-1.94684	1683	746	0.571287	0.099394	0.969768	0.861879	0.173983	6798	5643	0.614781	-0.752219	0.525411	0.22112	-1.22356	11871	16770	0.633044	-1.52247	0.0787909	0.0161726	-2.405	24933	33439	0.607425	-1.52359	0.0953512	0.0121323
CNAG_00404	1	6	1.10077	0.579808	0.999845	0.598383	0.526728	25	25	3.74719	1.19593	0.931588	0.783109	0.436	0.778966	4	4	1.18569	-0.693709		0.558501	-0.585069	4	1	0.927848	0.240773	0.952882	0.795252	0.259496	19	15	1.00801	-0.65223		0.517603	-0.647045	16	11	1.00593	-1.12412		0.263781	-1.1175	29	17	0.920558	-0.445477	0.860658	0.628442
CNAG_00405	3	8	0.934864	0.193428	0.999845	0.836084	0.206905	31	36	4.42576	1.07926	-0.207815	0.956733	0.847309	-0.192553	5	2	1.01879	-0.94656		0.352834	-0.929107	4	2	0.772818	0.357426	0.922183	0.643725	0.462496	35	12	0.866244	-0.951688		0.271926	-1.09864	15	21	0.764608	0.159006	0.930185	0.835262	0.207958	40	34	0.738324	0.69926	0.69749	0.343593
CNAG_00406	6	11	0.957947	-0.897763	0.999845	0.348669	-0.937174	30	24	7.97872	1.03818	-0.25666	0.945905	0.804738	-0.24722	4	6	1.09169	0.352261		0.746942	0.322674	8	1	1.09635	-0.902471	0.801118	0.410416	-0.823162	9	5	1.06236	-0.485427		0.647721	-0.456931	11	12	0.990141	0.095224		0.923384	0.0961722	33	27	0.985747	-0.213866	0.946482	0.828241
CNAG_00407	53	349	0.431964	0.40546	0.999845	0.347914	0.938643	1241	1113	151.049	0.45389	-1.07815	0.154519	0.0175321	-2.37535	90	30	0.535165	-1.35243	0.0982547	0.0114998	-2.52713	75	41	0.416674	0.621018	0.52762	0.136114	1.49042	589	494	0.423473	0.230398	0.823496	0.586394	0.544069	527	556	0.418133	0.102008	0.914378	0.80726	0.243962	1308	1418	0.410799	0.428933	0.655631	0.296419
CNAG_00408	1	12	1.19489	-0.117846	0.999845	0.921436	-0.0986249	21	30	3.0421	1.55813	-1.84762		0.235704	-1.18579	1	1	0.529707	1.34605	0.0968513	0.0110496	2.54113	5	2	0.521258	0.441039	0.792353	0.397493	0.846106	10	4	0.511621	1.02208	0.226129	0.0457467	1.99772	21	21	0.504897	0.977398	0.179936	0.0528879	1.93584	24	43	0.500616	0.956335	0.28804	0.0560926
CNAG_00409	4	21	0.698428	0.222041	0.999845	0.750549	0.317915	80	60	9.5376	0.814346	-0.479509	0.855311	0.555977	-0.588827	9	3	1.88593	-0.977881		0.604099	-0.518515	8	5	1.56784	-0.659737		0.673906	-0.420793	36	34	1.6962	-1.2612		0.457154	-0.743542	41	50	1.37543	1.3023		0.343726	0.946829	121	115	1.36437	1.2574		0.356738
CNAG_00410	21	65	0.445101	-0.0628959	0.999845	0.887627	-0.141307	221	211	36.2471	0.489983	-0.34005	0.819025	0.48768	-0.694004	37	13	0.982389	0.264162		0.788008	0.268898	21	8	0.911147	-0.269815	0.94877	0.767133	-0.296127	96	56	0.884767	0.145411		0.869456	0.16435	127	108	0.823987	0.872507	0.526051	0.289652	1.05888	276	268	0.825038	0.4358	0.84811	0.597348
CNAG_00411	3	16	0.692518	0.467971	0.999845	0.499197	0.675753	70	57	11.2876	0.766338	0.537749	0.814202	0.482859	0.701712	12	6	1.23507	0.861597		0.485422	0.697609	7	2	1.09136	1.88392	0.409769	0.0843088	1.72621	26	19	1.72327	-2.58535		0.133549	-1.50025	40	55	1.14386	0.277819	0.914378	0.808099	0.24288	91	103	1.12208	0.2661	0.94264	0.812542
CNAG_00412	2	0	2.01769	-0.550341	0.999845	0.785039	-0.272758	5	8	2.34795	2.06532	1.33733		0.517297	0.647518	1	4	5.73511	1.92251		0.737461	0.335217	1	3	5.75081	-0.636665		0.911847	-0.110709	3	0	5.75081	-0.551639		0.923581	-0.0959237	2	0	5.73966	0.322809		0.955149	0.0562418	0	2	5.62571	1.67279		0.766202
CNAG_00413	12	120	0.744136	0.320414	0.999845	0.66677	0.430586	295	380	49.8482	0.759949	0.248573	0.93096	0.743598	0.327092	89	13	1.30342	0.97946		0.452381	0.751451	48	18	1.15378	1.5504	0.59629	0.179026	1.34376	141	98	1.30342	-0.149494		0.908689	-0.114693	185	161	1.15635	1.08913		0.346259	0.94187	342	310	1.15405	0.733704	0.808484	0.524931
CNAG_00414	2	8	0.983519	0.258387	0.999845	0.792769	0.262717	37	23	4.09128	1.28601	-1.17474	0.733469	0.360992	-0.913476	2	1	2.34177	1.09593		0.639789	0.467994	4	3	2.3922	-0.544357		0.819992	-0.227555	9	9	2.57726	-1.61502		0.530895	-0.626641	13	16	2.61273	-3.4888		0.181774	-1.33531	29	16	2.35233	-1.04154		0.657932
CNAG_00415	2	6	1.1832	0.263855	0.999845	0.823535	0.223001	14	36	4.61895	1.25841	0.833988	0.83117	0.507502	0.662732	4	5	0.944933	0.33818	0.840243	0.720427	0.357888	1	4	0.798802	1.05781	0.600939	0.185422	1.32424	7	11	0.845511	0.260904	0.902668	0.757644	0.308576	21	7	0.794409	0.765819	0.57426	0.33504	0.964011	28	27	0.763923	1.54747	0.240753	0.0427965
CNAG_00416	3	41	0.710045	1.02667	0.999845	0.1482	1.44592	148	224	59.0116	0.755345	0.360404	0.894015	0.633264	0.477138	17	13	1.31132	-0.607405		0.643221	-0.4632	13	14	1.10444	0.147809	0.977999	0.893536	0.133831	67	73	1.26173	-1.43024		0.256982	-1.13355	92	17	1.21841	-1.60312		0.188259	-1.31575	22	16	1.12677	-1.02757	0.711831	0.361793
CNAG_00417	134	433	0.3104	0.0772355	0.999845	0.803496	0.248826	1688	1449	268.087	0.318811	-0.0374038	0.975601	0.906604	-0.117323	274	123	1.99258	-0.38482		0.84686	-0.193127	157	81	1.50432	2.84893	0.326843	0.0582476	1.89383	760	550	1.48532	4.31254		0.00369084	2.90344	985	1052	1.58233	0.602317		0.703461	0.380652	1945	2269	1.67686	-0.752037	0.872907	0.653808
CNAG_00418	47	168	0.451954	0.341512	0.999845	0.449869	0.755634	696	693	94.8946	0.472762	-0.411384	0.747477	0.384206	-0.870173	100	23	1.49614	2.7397		0.0670737	1.83118	58	22	2.0209	-3.07935	0.511039	0.12757	-1.52375	327	250	1.74452	-0.565582		0.745783	-0.324205	445	416	1.49484	1.12829		0.450375	0.75479	1012	1011	1.44155	2.35186	0.400438	0.10279
CNAG_00419	2	1	1.62857	-0.0608832	0.999845	0.970178	-0.0373845	9	12	2.34456	1.73693	0.720501		0.67828	0.414812	1	3	0.899713	1.84373	0.17871	0.0404385	2.04924	1	1	0.847657	1.72251	0.267611	0.0421449	2.03209	3	4	0.860568	1.46083	0.335227	0.0895985	1.69752	4	5	0.834094	1.79573	0.1251	0.0313259	2.15291	12	11	0.818262	2.25466	0.0512494	0.00586166
CNAG_00420	6	10	0.793841	-0.55392	0.999845	0.48532	-0.697772	35	29	9.6094	0.859347	0.332023	0.91813	0.699225	0.386367	8	7	0.857834	-1.23034	0.355614	0.151502	-1.43425	10	5	0.632813	-0.109304	0.969768	0.862865	-0.172728	19	22	0.607974	0.637064	0.607393	0.294709	1.04785	23	28	0.590013	0.876272	0.335316	0.137498	1.48517	37	41	0.595539	0.204311	0.911834	0.731547
CNAG_00421	6	16	0.734028	-0.778505	0.999845	0.288875	-1.06059	41	28	8.1154	0.80612	-0.0102453	0.996527	0.98986	-0.0127094	11	5	1.70108	3.01917		0.0759218	1.77486	3	0	1.63229	3.14717	0.310602	0.0538459	1.92807	20	16	1.64326	2.92639		0.0749375	1.78085	43	30	1.65203	2.22182		0.178656	1.3449	49	59	1.65076	1.84586	0.621068	0.263487
CNAG_00422	6	12	0.72306	-0.379315	0.999845	0.599864	-0.524597	47	31	10.6484	0.772711	0.708242	0.732133	0.359369	0.916568	14	8	1.35548	0.49193		0.716665	0.362919	3	7	1.203	1.07208	0.780809	0.372837	0.891173	19	16	1.31622	-0.329302		0.802442	-0.250188	27	33	1.28298	-0.508368		0.691928	-0.39624	43	54	1.41279	-1.90345		0.177884
CNAG_00423	3	3	1.4275	-2.51242	0.912865	0.0784062	-1.76001	4	3	3.49224	1.44458	0.276338	0.957012	0.848296	0.191293	3	3	6.76629	-0.858226		0.899068	-0.126839	1	0	6.76629	-2.07596		0.758989	-0.306809	2	0	6.75454	-0.641386		0.92435	-0.0949563	4	3	6.68895	-0.0213324		0.997455	-0.0031892	9	12	6.6432	0.846148		0.898647
CNAG_00424	6	38	0.556446	0.12833	0.999845	0.817607	0.230624	116	108	18.2304	0.611861	0.13266	0.951963	0.828354	0.216814	22	9	0.838324	-0.271851	0.859463	0.745726	-0.32428	15	5	0.719296	0.788043	0.7101	0.273264	1.09558	127	73	0.737302	0.261872	0.886066	0.722458	0.355176	66	91	0.762466	-0.831195	0.511431	0.275651	-1.09014	143	126	0.724631	-0.231036	0.922578	0.749854
CNAG_00425	1	0	1.78777	1.44933	0.999845	0.417543	0.810691	6	12	2.32482	1.95506	1.74291		0.37267	0.891484	2	1	2.87059	1.9493		0.4971	0.679059	4	1	2.7209	1.80844		0.506277	0.664647	1	1	2.7532	1.67514		0.5429	0.608434	1	7	2.74604	1.22453		0.655651	0.445925	9	2	2.7209	0.999544		0.713353
CNAG_00426	4	22	0.669274	0.614011	0.999845	0.358918	0.917429	105	85	12.6899	0.755251	-0.0043649	0.998192	0.995389	-0.0057794	12	5	1.44643	-1.24454		0.389554	-0.860426	7	1	1.12471	-0.152596	0.977824	0.892077	-0.135676	41	47	1.18252	-0.768162		0.515953	-0.649596	60	72	1.1872	-1.3089		0.270236	-1.10252	143	96	1.17423	-1.58346	0.519658	0.177495
CNAG_00427	3	26	0.730928	0.551249	0.999845	0.450743	0.754177	114	76	14.0065	0.779595	0.625584	0.773915	0.422295	0.802446	23	6	1.34445	1.45199		0.280148	1.07999	16	7	1.28147	1.06448	0.797753	0.406159	0.830672	52	37	1.39608	-0.144373		0.917635	-0.103413	59	69	1.29654	0.416316		0.748137	0.321097	118	134	1.2699	0.47055	0.900345	0.71098
CNAG_00428	2	16	0.865076	-0.333567	0.999845	0.699799	-0.385592	39	26	5.92582	1.00094	-0.512371	0.882341	0.608727	-0.511892	6	2	0.74888	-0.438817	0.721351	0.557899	-0.585965	5	4	0.653426	-0.0481191	0.988136	0.941296	-0.0736412	6	16	0.645745	0.28559	0.864791	0.658298	0.442265	17	27	0.627391	0.565951	0.608207	0.367019	0.902072	38	33	0.614619	1.11649	0.327792	0.0692846
CNAG_00429	3	10	0.789797	0.353183	0.999845	0.654744	0.447182	38	47	7.11308	0.897461	0.2524	0.939049	0.778528	0.281238	8	3	2.14324	0.795239		0.710603	0.371046	2	6	2.01165	0.914513		0.649391	0.454609	17	39	2.36266	-1.60837		0.496033	-0.680745	29	26	2.06067	-0.131284		0.949202	-0.0637095	50	43	1.98766	0.563838		0.776664
CNAG_00430	2	5	1.51885	-3.25523	0.475307	0.0320955	-2.14322	2	2	1.73514	1.68145	-1.29786		0.440193	-0.771868	1	1	0.8584	0.959794		0.263516	1.11812	0	1	0.808263	0.666654	0.800525	0.409486	0.824798	1	1	0.85627	-0.142101		0.868194	-0.165953	1	0	0.827315	-0.156234	0.933485	0.850214	-0.188845	7	1	0.816799	-0.34412	0.882651	0.673534
CNAG_00433	0	10	1.61866	0.59193	0.999845	0.714596	0.365691	25	31	4.10507	1.68794	0.784277	0.897037	0.642192	0.464637	11	0	1.0531	0.576783		0.583898	0.5477	4	3	0.87988	1.81807	0.252091	0.038803	2.06627	19	17	1.00243	-0.124684		0.901013	-0.124382	26	13	0.930418	0.265233	0.896945	0.775592	0.285068	22	18	0.890654	0.683461	0.774873	0.442861
CNAG_00434	1	15	0.900067	0.892973	0.999845	0.32114	0.992118	58	70	9.35466	0.961302	0.903575	0.720201	0.347244	0.939949	13	5	1.45176	0.993843		0.493611	0.684576	5	0	1.37373	0.576317	0.932248	0.674832	0.419526	35	22	1.86056	-2.17251		0.242942	-1.16767	26	29	1.49442	-0.946125		0.526666	-0.633104	92	88	1.32029	0.71512	0.841539	0.588068
CNAG_00435	1	0	2.97568	0.174482	0.999845	0.953242	0.0586362	7	3	0.883145	3.27515	-1.605		0.624097	-0.490052	0	0	1.50269	-2.90972		0.0528268	-1.93633	1	0	0.733803	0.0560927	0.987676	0.939068	0.0764411	6	6	0.72198	0.373835	0.835613	0.604603	0.517792	3	10	0.681118	1.12228	0.271169	0.0994129	1.64771	5	7	0.691918	0.281028	0.886911	0.684627
CNAG_00436	3	49	0.745814	1.08324	0.999845	0.146384	1.45242	194	249	24.0683	0.82374	-0.670184	0.770338	0.415882	-0.813587	15	4	2.22877	1.57971		0.47846	0.708782	6	2	2.0462	2.36871		0.247021	1.15762	66	63	2.07516	1.92091		0.354618	0.925669	82	38	2.06622	1.56959		0.447467	0.759645	157	55	2.08167	0.915094		0.66023
CNAG_00437	1	2	1.62422	0.25778	0.999845	0.873898	0.15871	12	8	1.49194	1.76569	0.769322		0.66305	0.435706	3	1	6.76668	0.581073		0.931568	0.0858726	1	0	6.76153	0.76335		0.910113	0.112896	2	0	6.76668	-0.551636		0.935027	-0.0815223	4	0	6.70522	1.14939		0.863895	0.171418	4	11	6.70424	0.758013		0.909979
CNAG_00438	0	3	1.31927	0.46579	0.999845	0.724039	0.353066	9	10	3.88873	1.41449	1.68748	0.608256	0.232871	1.19299	4	2	0.833555	-0.174197	0.898589	0.834463	-0.208981	8	1	0.703541	0.334901	0.917987	0.634058	0.476022	7	8	0.707998	0.3237	0.8588	0.647524	0.457205	3	9	0.66823	1.08206	0.28039	0.105383	1.6193	12	19	0.670952	0.54971	0.755741	0.412616
CNAG_00439	11	32	0.566027	0.195439	0.999845	0.729882	0.345282	107	153	20.5237	0.620881	0.00236395	0.998238	0.996962	0.00380741	21	10	0.690271	-0.638099	0.561097	0.355269	-0.924418	25	13	0.574136	0.080691	0.977017	0.888231	0.140543	60	49	0.636624	-1.12354	0.312024	0.0775913	-1.76484	58	58	0.572172	-0.260707	0.817091	0.648645	-0.455645	147	127	0.553586	0.108175	0.952136	0.845074
CNAG_00440	2	4	1.23496	-0.163383	0.999845	0.894748	-0.132299	13	17	2.50824	1.62134	-1.30702		0.420165	-0.806134	2	0	1.06642	0.193784	0.914307	0.855808	0.181713	3	2	1.04457	-0.784935	0.828183	0.452387	-0.751441	8	6	0.936712	1.90411	0.215213	0.0420764	2.03276	8	12	0.923119	2.67903	0.024652	0.00370611	2.90215	19	30	0.926347	1.85382	0.25267	0.0453691
CNAG_00441	58	147	0.3826	0.0331963	0.999845	0.930858	0.0867652	590	576	98.4763	0.406901	-0.494795	0.596565	0.223982	-1.21601	84	30	1.74873	1.00343		0.5661	0.573804	63	24	2.12887	-2.24788		0.291013	-1.0559	279	216	1.7226	0.147442		0.93179	0.0855926	361	453	1.65377	0.777864		0.638098	0.47036	786	805	1.79145	-1.40639		0.43242
CNAG_00442	7	16	0.686689	-0.340773	0.999845	0.619714	-0.496256	44	56	12.7751	0.800386	-0.561872	0.814202	0.482678	-0.702002	9	3	2.64017	-0.859784		0.744686	-0.325654	6	3	2.32191	1.4199		0.540854	0.611523	31	29	2.40906	0.644877		0.788939	0.267689	28	30	2.59743	-0.980311		0.705865	-0.377416	60	40	2.29184	1.08194		0.636867
CNAG_00443	1	1	1.49384	1.59859	0.999845	0.284563	1.07012	17	18	4.09853	1.55707	2.52625	0.419282	0.10471	1.62244	6	3	1.37039	1.50516		0.272054	1.09835	4	4	1.28961	1.56037	0.656887	0.226297	1.20995	6	4	1.89543	-3.57795		0.0590708	-1.88767	7	4	1.30827	0.756008		0.563353	0.577868	8	15	1.27709	1.09827	0.734019	0.389802
CNAG_00444	4	12	1.29437	-1.23667	0.999845	0.339364	-0.955422	16	20	7.96496	1.36065	-0.228776	0.965328	0.866476	-0.168137	0	7	2.16323	2.59508		0.230282	1.19963	1	2	2.17148	1.26745		0.559434	0.583682	9	4	2.18336	1.23196		0.572583	0.564252	14	13	2.15625	1.04643		0.627464	0.485299	10	15	2.19766	0.186239		0.932465
CNAG_00445	12	115	0.647742	-0.459014	0.999845	0.47855	-0.708636	225	161	53.5169	0.654531	1.20175	0.333815	0.0663514	1.83604	91	64	0.866853	-0.00867328		0.992017	-0.0100055	152	29	0.870562	-1.29769	0.52762	0.136057	-1.49064	122	123	0.877718	-1.31783		0.133244	-1.50143	153	114	1.14297	-3.89184	0.00547731	0.00066156	-3.40503	244	200	0.865895	-2.03094	0.133839	0.0190027
CNAG_00446	0	1	1.86149	0.125313	0.999845	0.946328	0.0673187	2	4	2.2372	1.85453	3.25427		0.079299	1.75477	2	4	2.36945	-2.85356		0.228468	-1.20432	0	0	2.15322	-1.712		0.426561	-0.795091	1	0	2.17377	-1.73546		0.424658	-0.798367	4	2	2.1386	-2.03372		0.341625	-0.95096	1	3	2.1386	-2.43859		0.254172
CNAG_00447	20	122	0.439892	0.273445	0.999845	0.534193	0.621618	409	376	55.8935	0.47178	-0.286306	0.851027	0.543941	-0.606865	53	21	2.80118	0.581084		0.835664	0.207443	29	15	2.7866	0.778831		0.779868	0.279491	199	145	2.50711	2.9122		0.245408	1.16158	241	258	2.45755	3.33797		0.174383	1.35825	551	588	2.47228	2.59166		0.294507
CNAG_00448	9	24	0.572372	-0.182286	0.999845	0.750125	-0.318474	89	67	17.5611	0.64653	-0.155958	0.946875	0.809382	-0.241224	16	6	2.70818	0.687345		0.799648	0.253803	8	5	2.47263	1.30849		0.596673	0.529191	43	23	2.76669	-1.99754		0.470297	-0.721996	55	60	2.7398	-1.09858		0.688443	-0.400969	121	119	2.46852	0.557812		0.821224
CNAG_00449	15	20	0.919597	-1.05599	0.999845	0.250837	-1.14832	61	51	14.3486	1.01362	-1.47826	0.488991	0.144731	-1.4584	12	1	2.72562	-0.487027		0.858185	-0.178685	11	2	2.58158	-0.725277		0.778754	-0.280943	16	29	2.72965	-1.61138		0.554972	-0.590326	31	54	2.49267	-0.375224		0.880346	-0.150531	71	109	2.47165	-0.53265		0.829375
CNAG_00450	24	68	0.685107	-0.083009	0.999845	0.903563	-0.121162	276	196	35.0127	0.733563	-1.1071	0.461468	0.131245	-1.50921	32	4	1.71133	-1.98521		0.246032	-1.16004	28	10	1.21093	-0.632503	0.909819	0.601442	-0.522327	108	81	1.72975	-3.16809		0.0670209	-1.83153	137	167	1.28848	-1.68665		0.190525	-1.30903	292	308	1.2365	-1.6866		0.172564
CNAG_00451	3	6	1.17293	-0.785997	0.999845	0.502784	-0.670116	21	9	3.64301	1.57375	-1.91609	0.59563	0.223402	-1.21753	2	0	2.47538	-0.8601		0.728244	-0.347462	3	0	2.05358	2.97475		0.147458	1.44857	3	19	2.43569	-0.601051		0.805088	-0.246768	20	16	2.15245	0.787813		0.714359	0.366008	24	30	2.43405	-1.40553		0.563639
CNAG_00452	4	14	1.17679	-2.2077	0.769559	0.0606501	-1.87604	12	8	4.95285	1.21737	-0.13514	0.977257	0.911609	-0.11101	2	7	0.551723	1.47619	0.0773481	0.0074596	2.6756	5	6	0.5482	0.396526	0.83605	0.469481	0.723324	2	4	0.556361	0.152813	0.911552	0.783573	0.274666	9	1	0.53796	0.572364	0.524085	0.28735	1.06395	3	4	0.535709	0.328963	0.816509	0.53917
CNAG_00453	17	195	0.588522	0.610715	0.999845	0.299405	1.03771	680	623	76.0759	0.636019	-1.59252	0.123751	0.0122838	-2.50388	25	13	6.75243	0.468564		0.944678	0.0693918	33	11	6.68829	0.360629		0.956999	0.0539195	244	179	6.76563	-2.00333		0.767151	-0.296103	291	324	6.76563	-2.49777		0.711989	-0.369186	709	712	6.75674	-1.53137		0.820701
CNAG_00454	0	8	1.14903	1.63431	0.999845	0.154927	1.42234	48	55	8.66024	1.17556	2.6573	0.185978	0.0237932	2.26045	29	4	6.04862	-0.870205		0.885604	-0.143868	23	24	5.95456	0.489105		0.934536	0.0821395	23	19	6.04862	-2.00292		0.740541	-0.331136	28	18	5.93637	0.466685		0.937339	0.0786145	46	48	5.92681	0.302013		0.95936
CNAG_00455	7	14	0.772137	-0.838857	0.999845	0.277298	-1.08641	30	37	7.67793	0.843415	-0.0787982	0.983157	0.925564	-0.0934276	12	4	0.946039	1.0271		0.277618	1.08569	2	5	0.982199	-0.693033	0.844662	0.480441	-0.705594	23	15	0.965535	-0.395829		0.681836	-0.409959	28	32	0.890078	0.731417	0.646787	0.411222	0.821745	51	54	0.939656	-0.903261	0.691253	0.336417
CNAG_00456	18	62	0.460239	1.03718	0.373881	0.0242231	2.25357	422	420	42.7888	0.504949	-0.162338	0.931879	0.747837	-0.321493	42	11	1.0048	1.60003		0.111298	1.59238	28	14	0.996231	0.509538	0.910224	0.609025	0.511465	220	151	0.993718	0.634321		0.523258	0.638331	154	159	1.01164	-0.120908	0.957678	0.904866	-0.119517	272	270	0.959758	0.387592	0.887119	0.686328
CNAG_00457	57	232	0.314344	0.323051	0.999845	0.304091	1.0277	879	909	114.164	0.344482	-0.841754	0.137446	0.0145441	-2.44354	80	31	0.89379	-0.269701	0.870734	0.762843	-0.301749	58	33	0.691419	1.48546	0.219529	0.03168	2.14843	454	362	0.675102	2.495	0.00700365	0.000219252	3.69573	445	468	0.760807	-0.564122	0.686327	0.458403	-0.741479	1082	1031	0.741743	-0.657147	0.723255	0.375645
CNAG_00458	149	640	0.631495	-0.1388	0.999845	0.82603	-0.219797	2072	1416	278.795	0.634946	-0.125195	0.955718	0.843691	-0.197174	235	197	1.19865	-0.691414		0.564056	-0.576827	215	148	0.969093	-0.131926	0.977824	0.891716	-0.136133	802	693	1.1177	-1.37017		0.220243	-1.22588	1199	1730	0.959056	-0.400682		0.676102	-0.417788	3031	3999	0.900059	0.436241	0.860658	0.627903
CNAG_00460	0	7	1.86906	0.241844	0.999845	0.897046	0.129393	14	17	1.85804	2.25361	-1.60852		0.475381	-0.713752	0	1	1.42313	0.256585		0.85692	0.180296	2	0	1.38442	-0.623278		0.652559	-0.45021	4	3	1.43407	-0.961632		0.502499	-0.670564	9	10	1.61605	-2.46852		0.126637	-1.5275	17	20	1.30885	-0.444676		0.734048
CNAG_00461	43	225	0.398783	-0.127523	0.999845	0.749134	-0.319781	597	549	131.372	0.404373	1.13391	0.0640428	0.00504543	2.80412	299	97	1.47097	2.35535		0.109327	1.60123	195	51	1.45836	1.31812	0.774848	0.366081	0.903838	997	1198	1.49512	0.912808		0.541514	0.610525	976	787	1.41355	1.8619		0.18778	1.31718	910	915	1.39746	2.02453	0.481045	0.147416
CNAG_00462	13	86	0.504595	0.200535	0.999845	0.69106	0.397417	249	265	34.2882	0.545131	-0.309719	0.863873	0.569929	-0.568155	38	13	2.11649	-3.44388		0.103701	-1.62717	41	12	1.64694	-0.487726		0.767123	-0.29614	109	110	2.11649	-4.57662		0.0305901	-2.16236	115	153	1.6204	-0.419874		0.795544	-0.259118	324	335	1.64717	-1.29742		0.43089
CNAG_00463	0	0						0	0	0						0	0	3.72254	-0.500884		0.892964	-0.134554	0	0	3.74786	-3.07027		0.412669	-0.819205	0	1	3.74786	-2.98524		0.425731	-0.796518	0	0	3.74786	-3.47969		0.353175	-0.928448	0	0	3.56308	-0.914499		0.797442
CNAG_00464	24	112	0.499542	0.0873197	0.999845	0.861237	0.174799	349	344	48.6752	0.545486	-0.986448	0.344226	0.0705466	-1.80838	41	8	1.69252	-1.73312		0.305841	-1.02399	33	13	1.14864	0.00192396	0.999286	0.998664	0.001675	172	129	1.31507	-1.26868		0.334681	-0.964728	196	150	1.19143	-0.868826		0.46586	-0.729232	454	393	1.09073	0.153394	0.969559	0.888159
CNAG_00465	14	96	0.507214	0.131083	0.999845	0.79607	0.258437	287	253	33.9873	0.582218	-1.35114	0.16634	0.0203042	-2.32068	20	7	1.49857	1.28029		0.392917	0.854339	22	7	1.44123	0.779328		0.588687	0.540739	148	131	1.48269	0.31715		0.830624	0.213901	124	171	1.5905	-1.08942		0.493374	-0.684953	382	415	1.45926	-0.295364		0.839599
CNAG_00466	6	15	0.823515	-0.99102	0.999845	0.228821	-1.2034	36	22	7.18345	0.895019	-0.132836	0.969514	0.882014	-0.148417	9	5	1.35518	2.01521		0.137005	1.48704	7	2	1.27741	1.92305	0.518881	0.132212	1.50544	14	21	1.47007	-0.0123285		0.993309	-0.00838631	15	21	1.28427	1.37688		0.28367	1.07211	52	49	1.26214	1.47055	0.600594	0.243968
CNAG_00467	2	4	1.09367	0.0812909	0.999845	0.940749	0.0743285	17	18	4.26607	1.14461	1.54809	0.533122	0.176214	1.35251	6	6	0.773842	0.0893902	0.945515	0.908037	0.115515	6	1	0.760687	0.561281	0.831083	0.460599	0.737861	13	7	0.774407	-1.09474	0.44064	0.157464	-1.41365	4	2	0.762531	-0.233243	0.888034	0.759696	-0.30588	16	10	0.758964	0.271817	0.905095	0.720237
CNAG_00468	10	46	0.664771	-0.220736	0.999845	0.739853	-0.332048	116	116	15.3662	0.807725	-1.86481	0.17014	0.0209594	-2.30872	10	1	1.95428	-0.398431		0.838451	-0.203875	11	4	1.75747	-0.687884	0.938238	0.695498	-0.391405	54	49	1.48455	1.9232		0.195156	1.29548	59	57	1.4768	1.61054		0.275468	1.09056	134	130	1.44934	2.16431		0.135358
CNAG_00469	6	30	0.710893	-0.892427	0.999845	0.209348	-1.25536	56	37	9.31294	0.825856	-1.06515	0.558678	0.197137	-1.28975	7	4	4.07769	0.581081		0.886683	0.142503	8	1	3.95998	1.68543		0.670388	0.425616	25	22	4.07769	-0.551644		0.892388	-0.135283	31	38	3.92062	1.74977		0.655381	0.446299	67	83	3.86647	2.3782		0.538501
CNAG_00470	1	13	0.94519	0.212319	0.999845	0.822266	0.224631	38	33	6.37722	1.13741	-0.697906	0.848307	0.539484	-0.613594	3	2	1.08608	1.0742		0.322633	0.989061	3	3	1.01056	0.697063	0.850434	0.490332	0.689782	15	22	1.04467	0.349798		0.737746	0.33484	26	19	1.00268	0.401091	0.845186	0.689141	0.400021	38	54	0.933596	1.75506	0.299144	0.0601221
CNAG_00471	5	30	0.656767	-0.0146175	0.999845	0.982243	-0.0222568	87	75	14.2975	0.743029	-0.404732	0.874219	0.585956	-0.544705	15	3	0.86126	-1.11205	0.408083	0.196639	-1.29119	15	4	0.658533	-0.314891	0.917947	0.632529	-0.47817	22	31	0.658549	-0.230824	0.886494	0.725961	-0.350504	41	66	0.603082	0.896746	0.334557	0.137031	1.48694	108	109	0.606957	0.304218	0.855142	0.616217
CNAG_00472	3	8	0.899927	0.294244	0.999845	0.743695	0.326964	44	28	5.62113	1.04947	-0.202969	0.956733	0.846645	-0.193401	5	2	2.02303	1.56257		0.439883	0.772392	2	2	1.81879	2.38754	0.607373	0.18928	1.31271	16	20	1.89005	1.44607		0.444215	0.765094	29	28	1.83721	1.64376		0.370947	0.894702	71	65	1.80698	1.84383		0.307541
CNAG_00473	5	2	1.21873	0.126346	0.999845	0.917431	0.10367	22	39	6.3103	1.28821	0.53407	0.908899	0.678447	0.414583	5	5	2.45941	3.35914		0.171991	1.36583	3	0	2.50121	1.80743		0.469912	0.722622	7	9	2.37005	3.28655		0.165533	1.3867	17	10	2.42508	2.0509		0.397718	0.845704	32	27	2.34016	3.0029		0.199422
CNAG_00474	0	3	1.58225	1.73235	0.999845	0.273574	1.09487	11	32	4.372	1.62629	2.78695	0.383138	0.0865874	1.71368	10	3	6.76629	-0.858227		0.899068	-0.126839	2	7	6.75339	-0.513185		0.939428	-0.0759892	13	9	6.68895	0.485713		0.942113	0.0726142	12	12	6.70482	-0.289904		0.965512	-0.0432382	28	17	6.76629	-2.88979		0.669316
CNAG_00475	8	6	0.93287	0.199654	0.999845	0.830531	0.214021	56	60	10.3379	1.00327	0.109697	0.978037	0.912933	0.10934	8	6	1.10085	0.52077		0.63617	0.47306	12	6	1.03905	-0.0266013	0.995003	0.979575	-0.0256016	25	32	1.64209	-3.13258		0.0564329	-1.90768	32	32	1.05201	-0.598979		0.569106	-0.569368	41	40	1.02789	-0.684196	0.799581	0.505645
CNAG_00476	1	0	2.07792	-0.803898	0.999845	0.698848	-0.386876	1	3	1.49353	2.20029	1.1702		0.594838	0.531838	1	1	1.32842	2.49259		0.0606063	1.87636	0	0	1.3129	1.51173	0.681366	0.249549	1.15145	1	1	1.30075	1.80803		0.164533	1.38999	1	0	1.32244	0.954012		0.470661	0.721404	0	0	1.2709	1.59761	0.559813	0.208726
CNAG_00480	5	31	0.637889	0.424074	0.999845	0.506173	0.664808	120	105	18.8169	0.669879	0.98557	0.482862	0.141219	1.47127	28	16	0.886661	1.76339		0.0467237	1.9888	45	21	0.920088	0.0653077	0.988297	0.943414	0.0709798	58	55	0.865021	1.04772	0.530984	0.225817	1.2112	62	73	0.851055	0.891916	0.531393	0.294633	1.04801	146	159	0.866152	0.122461	0.969559	0.887566
CNAG_00481	0	0	4.81836	-1.16631		0.808738	-0.242055	0	1	0.403357	4.71251	2.86932		0.542609	0.608873	1	1	1.07026	-1.05274	0.539515	0.325298	-0.983629	0	0	0.709168	1.33722	0.331694	0.0593458	1.88562	1	0	0.807461	-0.409305	0.840627	0.612223	-0.506903	1	0	0.719394	0.611232	0.634161	0.39552	0.849649	1	2	0.703067	0.756436	0.640664	0.281968
CNAG_00482	9	70	0.567778	0.170292	0.999845	0.764233	0.299927	197	195	28.7723	0.611377	-0.230251	0.920729	0.706463	-0.376611	24	15	1.88046	-0.405436		0.829296	-0.215604	18	15	1.39803	1.54671	0.707382	0.268575	1.10635	127	80	1.4355	1.08266		0.450727	0.754204	93	139	1.49222	0.00389667		0.997916	0.00261133	262	317	1.33741	2.59151	0.277792	0.0526594
CNAG_00483	109	467	0.350075	0.205915	0.999845	0.556396	0.588203	1781	1459	220.855	0.363788	-0.769964	0.231324	0.0343006	-2.11652	176	59	1.5897	1.02061		0.520865	0.642012	109	67	1.51344	0.359301	0.956176	0.812341	0.237408	753	597	1.58742	-0.0944567		0.952551	-0.0595033	888	1038	1.38034	1.9065		0.167223	1.38118	2147	2455	1.37924	1.53383	0.622061	0.266103
CNAG_00484	8	11	0.84843	-0.862177	0.999845	0.309532	-1.0162	41	25	10.16	0.91694	-0.125978	0.971428	0.890723	-0.137389	13	3	0.537522	-1.73559	0.0316298	0.00124284	-3.22886	16	1	0.50327	0.173272	0.94877	0.730627	0.344292	17	26	0.502117	0.711887	0.439985	0.156258	1.41777	18	20	0.500188	1.42592	0.0282658	0.00436124	2.85078	41	36	0.500482	0.752558	0.454036	0.132667
CNAG_00485	5	93	0.951181	0.796483	0.999845	0.402389	0.837362	346	298	28.3101	1.01204	-1.4185	0.511459	0.161027	-1.40163	20	2	2.10735	3.01293		0.152797	1.42972	39	17	1.98005	2.80684		0.156319	1.41756	144	116	1.9887	2.80211		0.158831	1.40901	124	144	2.03908	1.85296		0.363496	0.908724	349	415	1.90411	3.20971		0.0918587
CNAG_00486	2	15	1.05209	1.02483	0.999845	0.33001	0.974094	71	84	10.7271	1.10615	0.776446	0.814202	0.482719	0.701936	8	8	3.62495	1.93531		0.59342	0.533887	15	6	3.43084	2.81158		0.4125	0.819503	38	42	3.65125	-0.551645		0.87991	-0.151084	42	33	3.63254	0.332899		0.926981	0.0916434	76	63	3.61664	0.126904		0.972009
CNAG_00487	2	3	1.02187	0.776556	0.999845	0.447294	0.759934	26	22	5.85072	1.05609	2.39426	0.183962	0.0233846	2.26709	16	5	2.03077	-1.85808		0.360211	-0.914963	14	6	1.47019	2.50232	0.423497	0.0887469	1.70205	19	13	1.75594	-0.561443		0.749167	-0.319738	17	9	1.59387	0.0214296		0.989273	0.0134449	18	30	1.51997	0.518649		0.732935
CNAG_00488	0	0	2.69712	2.62354	0.999845	0.330692	0.97272	7	7	0.952971	2.91324	2.43404		0.403431	0.83551	2	0	1.08965	1.16874		0.28346	1.07258	2	5	1.05285	0.438015	0.933562	0.677389	0.416029	4	3	1.04297	0.687784		0.509609	0.659447	1	9	1.02174	0.603724	0.761139	0.554602	0.590878	13	11	1.01445	0.369819	0.903169	0.715445
CNAG_00490	3	11	0.87997	0.54143	0.999845	0.538368	0.615282	47	56	6.29959	1.01217	-0.224443	0.95113	0.824512	-0.221746	8	1	1.24004	-0.146901		0.905699	-0.118465	3	0	1.04196	0.238094	0.957055	0.819253	0.228506	34	19	1.0121	0.781627		0.439946	0.772285	18	32	0.983334	0.900873	0.600299	0.359592	0.916142	35	39	0.964872	1.07781	0.621309	0.263974
CNAG_00491	5	10	0.795264	-0.265325	0.999845	0.738658	-0.333631	29	41	7.79906	0.89161	0.0214843	0.994371	0.980776	0.024096	9	3	1.74317	-1.45406		0.404198	-0.834147	4	3	1.12934	2.02773	0.373522	0.0725729	1.79551	20	19	1.25164	-0.0721253		0.954048	-0.0576245	18	22	1.76222	-3.06649		0.0818358	-1.74013	34	42	1.13598	0.979893	0.733921	0.388358
CNAG_00492	0	0	4.79923	2.71808		0.571151	0.566358	9	6	0.338271	4.99758	0.349167		0.944299	0.0698673	0	0	0.96969	-1.03279		0.286841	-1.06508	0	1	0.743237	-0.247062	0.94877	0.739577	-0.332414	3	2	0.728149	0.105017		0.885323	0.144225	6	1	0.735149	-0.519474	0.701973	0.4798	-0.706624	2	0	0.696748	-0.0383242	0.994026	0.956135
CNAG_00493	5	33	0.752398	-0.850648	0.999845	0.25823	-1.13058	52	44	10.3441	0.807797	-0.155963	0.956733	0.846903	-0.193072	9	10	0.600948	1.12502	0.219566	0.0611961	1.87208	21	10	0.726605	-4.35458	4.61651e-08	2.05944e-09	-5.99305	27	19	0.600965	-0.0199365	0.986944	0.973536	-0.0331742	46	32	0.659414	-3.67172	1.06368e-06	2.57441e-08	-5.56816	50	32	0.67347	-4.3721	1.64737e-09	8.47597e-11
CNAG_00495	2	1	1.4335	0.027719	0.999845	0.984573	0.0193366	8	13	3.37869	1.47116	1.97895	0.535352	0.178572	1.34516	5	5	6.66325	-2.45005		0.7131	-0.367695	0	0	6.65802	-2.26776		0.733401	-0.340605	6	0	6.66325	-3.58275		0.590792	-0.537689	12	6	6.66325	-4.0772		0.540608	-0.611894	7	11	6.66325	-4.48161		0.501211
CNAG_00496	6	15	0.6973	-0.368809	0.999845	0.596868	-0.52891	47	41	11.9435	0.77665	0.0464256	0.989641	0.952333	0.0597767	8	7	1.71681	3.58436		0.0368154	2.0878	9	0	1.71782	2.34387	0.588686	0.172428	1.36444	27	29	1.94484	0.352768		0.856064	0.181387	29	27	1.78615	0.996034		0.577089	0.557642	56	49	1.67735	2.60075	0.431634	0.12102
CNAG_00497	7	110	0.81244	0.538623	0.999845	0.50735	0.66297	376	282	38.7481	0.837054	-0.199894	0.947249	0.811256	-0.238806	52	9	0.765429	-0.161319	0.898411	0.833078	-0.210756	34	8	0.651383	0.196676	0.94877	0.762701	0.301935	159	162	0.693175	-0.468682	0.764357	0.498953	-0.676138	156	198	0.637862	0.129312	0.93244	0.839348	0.202727	430	424	0.620561	0.305894	0.856767	0.622061
CNAG_00498	2	8	0.891122	0.081138	0.999845	0.927452	0.0910515	28	25	5.21829	0.966729	0.879409	0.734421	0.362994	0.909674	7	5	1.54464	0.700677		0.650103	0.453619	6	0	1.44228	0.920456	0.870033	0.523346	0.638197	20	11	1.99585	-3.98816		0.0456921	-1.99823	7	10	1.69407	-1.9392		0.252335	-1.1447	27	34	1.48245	-0.619994		0.675785
CNAG_00499	4	11	0.813282	0.4128	0.999845	0.611753	0.507573	52	54	7.16326	0.917339	0.0500914	0.990255	0.956453	0.0546051	10	2	1.53334	-1.13929		0.457475	-0.743011	3	1	1.17834	0.484046	0.935006	0.681229	0.410787	18	12	1.30283	-0.991134		0.446803	-0.760755	26	25	1.15353	0.737588		0.522551	0.639417	62	48	1.20277	-0.775174	0.805635	0.519258
CNAG_00500	22	44	0.545427	-0.35107	0.999845	0.519796	-0.64366	137	165	30.2101	0.598678	-0.646308	0.662109	0.280339	-1.07956	24	10	2.69495	-0.864548		0.74836	-0.320803	15	7	2.39196	1.31006		0.583904	0.547692	78	75	2.66002	-0.614495		0.817306	-0.231012	70	79	2.33494	1.91117		0.413067	0.818509	180	166	2.42968	0.0819349		0.973098
CNAG_00501	3	2	1.51662	-1.01342	0.999845	0.504	-0.66821	4	14	5.18162	1.54892	1.12413	0.806294	0.467993	0.725748	1	7	1.69887	0.390502		0.8182	0.229861	5	4	1.53683	0.753692		0.623836	0.490422	3	5	2.04408	-3.58111		0.0797843	-1.75194	3	11	1.77133	-1.63751		0.35525	-0.924454	6	3	1.54376	-0.166294		0.914218
CNAG_00502	1	5	1.13382	-0.285944	0.999845	0.80089	-0.252196	10	14	5.11749	1.20232	1.20031	0.697998	0.318121	0.998327	3	5	6.75349	1.92027		0.776152	0.284337	3	0	6.68936	1.81232		0.786448	0.270926	9	8	6.76668	-0.551636		0.935027	-0.0815223	8	10	6.76668	-1.04608		0.877142	-0.154593	33	26	6.76668	-1.45049		0.830268
CNAG_00503	11	20	0.657912	-0.252417	0.999845	0.701227	-0.383664	81	72	16.4614	0.703507	0.286446	0.911634	0.683884	0.407169	15	13	1.33474	-1.30244		0.329164	-0.9758	11	4	1.07351	0.0207822	0.996419	0.984555	0.0193592	49	26	1.21884	-1.71329		0.159821	-1.40568	62	46	1.24948	-2.42562		0.0522203	-1.94131	112	95	1.09082	-1.14719	0.652501	0.292949
CNAG_00504	7	25	0.693363	-0.192584	0.999845	0.781202	-0.277754	87	56	14.6134	0.748482	0.128962	0.963441	0.863203	0.172298	21	5	1.1097	-1.39099		0.210031	-1.25348	7	2	0.750033	1.07429	0.553529	0.152052	1.43232	34	40	0.931762	-1.50841		0.105474	-1.61887	34	68	0.81735	-0.83497	0.5451	0.306991	-1.02156	100	84	0.78755	-0.736295	0.703467	0.34983
CNAG_00505	5	7	0.984227	-0.814767	0.999845	0.40777	-0.827825	17	25	5.69349	1.14962	-0.869103	0.793175	0.449654	-0.755993	2	3	2.08377	-3.18802		0.126034	-1.52993	7	2	2.08377	-4.40578		0.0344868	-2.11433	17	9	2.03619	-2.92771		0.15048	-1.43784	8	9	1.68697	-1.53647		0.362405	-0.910791	17	21	1.58451	-0.706882		0.655511
CNAG_00506	3	15	0.851938	-0.790185	0.999845	0.35366	-0.927514	20	30	5.55252	0.949253	-0.189824	0.955718	0.841503	-0.199972	6	4	1.95097	-1.36755		0.48333	-0.700957	1	4	1.56386	-0.36152		0.817181	-0.231172	7	12	2.0235	-3.98796		0.0487439	-1.97082	11	18	1.58325	-0.958438		0.544939	-0.605361	21	42	1.58368	-1.36741		0.387899
CNAG_00507	0	7	1.56461	0.35871	0.999845	0.818663	0.229265	15	20	2.30977	1.66378	0.698911		0.674431	0.420075	4	2	1.34235	-0.697158		0.603512	-0.519357	4	1	1.12331	0.129781	0.982864	0.908021	0.115535	15	16	1.17262	-0.500394		0.669575	-0.426732	4	5	1.47628	-2.93279		0.0469657	-1.98661	15	10	1.0934	0.0101682	0.99717	0.99258
CNAG_00508	4	32	0.787893	-0.179155	0.999845	0.820125	-0.227385	56	84	9.22647	0.976141	-1.76698	0.343615	0.0702692	-1.81017	3	3	1.71091	-4.02947		0.0185147	-2.35516	6	0	0.96781	0.718054	0.829575	0.458126	0.741936	18	32	1.37351	-2.74011		0.0460467	-1.99497	47	39	1.18406	-2.3168		0.0503868	-1.95667	56	76	1.01303	-1.08431	0.643735	0.284454
CNAG_00509	24	104	0.391091	0.110764	0.999845	0.77701	0.283217	341	336	54.4693	0.428814	-0.350978	0.768454	0.413081	-0.818484	51	18	1.15807	-0.832542		0.472201	-0.718902	36	8	0.895548	0.243391	0.950745	0.785792	0.271778	131	120	1.65586	-4.99432		0.00256011	-3.01615	211	236	0.898336	-0.213682	0.916739	0.811987	-0.237864	412	383	0.856295	0.398561	0.865071	0.64161
CNAG_00510	1	11	0.986671	0.19183	0.999845	0.845846	0.194421	31	30	5.50054	1.12371	-0.0732609	0.989043	0.948018	-0.0651954	5	2	6.76668	0.581073		0.931568	0.0858726	7	4	6.69734	1.67108		0.802963	0.249515	10	10	6.76668	-0.551636		0.935027	-0.0815223	6	17	6.68935	1.41796		0.832128	0.211973	35	39	6.74542	0.203456		0.975938
CNAG_00511	0	3	1.29292	2.1976	0.98344	0.0891846	1.69971	28	35	6.62228	1.37798	2.21298	0.423875	0.108284	1.60596	4	4	6.76668	0.581073		0.931568	0.0858726	2	2	6.68935	1.81232		0.786448	0.270926	15	13	6.76668	-0.551636		0.935027	-0.0815223	9	7	6.76668	-1.04608		0.877142	-0.154593	7	7	6.76668	-1.45049		0.830268
CNAG_00512	11	30	0.520233	-0.259225	0.999845	0.618282	-0.498286	101	82	20.5987	0.55857	0.535121	0.715102	0.338053	0.95802	29	14	3.35576	1.9391		0.563372	0.577841	22	15	3.24035	1.69684		0.600516	0.523659	51	42	3.33747	1.05229		0.752537	0.315296	53	52	3.19191	1.76643		0.579984	0.553407	123	101	3.09453	3.37894		0.274875
CNAG_00513	8	12	0.813067	-0.830123	0.999845	0.307265	-1.02098	32	37	8.32182	1.04067	-1.7884	0.381377	0.085705	-1.7185	4	1	3.42247	1.93807		0.571206	0.566277	4	2	3.29643	1.81005		0.58294	0.549095	11	13	3.21654	2.9198		0.364012	0.907747	27	30	3.32154	1.19536		0.718935	0.359883	48	44	3.20687	2.19233		0.494205
CNAG_00514	4	22	0.768657	-0.0757845	0.999845	0.921461	-0.0985934	71	46	9.76201	0.852307	-0.184092	0.951993	0.828993	-0.215993	8	6	0.564985	0.0640282	0.946706	0.909771	0.113327	15	10	0.521481	-0.288889	0.900566	0.579594	-0.553978	33	18	0.53137	-0.440562	0.691205	0.407044	-0.829106	37	24	0.512475	-0.444767	0.625716	0.38546	-0.86788	78	61	0.50483	-0.599596	0.59049	0.234944
CNAG_00515	1	10	0.961417	0.756712	0.999845	0.431235	0.78708	39	45	6.2624	1.01138	1.45862	0.496174	0.149244	1.44221	16	4	0.787842	1.58103	0.187828	0.0447721	2.00679	18	4	0.815033	-0.00123652	0.999286	0.998789	-0.00151714	13	18	0.778814	0.598409	0.718706	0.442274	0.768359	24	9	0.743973	0.846387	0.49025	0.255263	1.13766	40	36	0.728506	0.928303	0.551278	0.202573
CNAG_00516	1	13	0.941504	0.510398	0.999845	0.587744	0.542109	37	50	5.94407	1.02247	0.575351	0.866088	0.573633	0.562709	10	3	1.72549	1.29047		0.45453	0.747884	3	4	2.15112	-3.65814		0.0890229	-1.70057	19	14	2.10507	-2.18011		0.300368	-1.03564	25	21	1.69651	0.0338235		0.984094	0.0199371	39	23	1.68355	-0.166601		0.921171
CNAG_00517	5	13	0.770144	-0.276542	0.999845	0.719537	-0.359078	44	36	7.83026	0.875507	-0.233661	0.942187	0.789557	-0.266886	7	4	1.2642	0.797287		0.52826	0.630664	2	4	1.19195	0.322795	0.950745	0.786535	0.270813	22	21	1.36522	-1.01741		0.456132	-0.745231	28	27	1.79855	-4.49083		0.0125279	-2.49692	62	52	1.15053	0.165367	0.968727	0.885712
CNAG_00519	9	59	0.519144	0.678173	0.999845	0.19144	1.30633	249	249	35.2584	0.554799	0.352126	0.840826	0.52563	0.634691	39	16	1.50726	0.432671		0.774068	0.287058	33	16	1.3214	0.921182	0.847902	0.485724	0.697126	112	91	1.43418	-0.212792		0.882049	-0.148372	149	117	1.3427	0.203075		0.879784	0.151243	247	238	1.39568	-0.786343		0.573153
CNAG_00520	56	188	0.494059	-0.034686	0.999845	0.94403	-0.0702062	671	566	93.7993	0.510424	-0.41558	0.770091	0.415538	-0.814186	115	27	0.958811	-0.434057		0.650762	-0.452704	63	25	0.825585	0.304315	0.942314	0.712422	0.368605	282	251	0.879315	-0.677993		0.440679	-0.771047	336	402	0.896097	-1.40261	0.302222	0.117527	-1.56524	872	772	0.828843	-0.59392	0.791386	0.473642
CNAG_00521	1	32	0.895473	0.63786	0.999845	0.476269	0.712316	105	95	11.3727	1.00966	-0.818988	0.771022	0.417277	-0.811154	7	3	0.755169	-2.07057	0.0696587	0.00610927	-2.74186	19	4	0.499057	0.501045	0.750233	0.315386	1.00398	73	40	0.516739	-0.17099	0.895942	0.740719	-0.330902	61	67	0.506174	-0.256393	0.796562	0.612483	-0.506532	148	88	0.508011	-0.742012	0.476511	0.14412
CNAG_00522	15	274	0.756873	0.917551	0.999845	0.225401	1.21229	1105	934	89.4174	0.773262	-0.70108	0.735001	0.36459	-0.906653	73	23	0.863146	0.551224		0.523069	0.638622	46	13	0.7787	0.644195	0.799477	0.408084	0.827269	519	454	0.975544	-1.50286		0.123431	-1.54053	361	533	0.82747	-0.635857	0.674328	0.442229	-0.768435	1198	1156	0.764493	0.213705	0.93102	0.779832
CNAG_00523	1	12	1.2117	-0.895623	0.999845	0.45982	-0.739143	21	9	3.54898	1.33143	-0.321944	0.946875	0.808933	-0.241803	4	2	1.26103	-0.369904		0.769266	-0.293335	4	4	1.50301	-3.00182	0.281752	0.0458032	-1.9972	15	7	1.37882	-2.33639		0.0901725	-1.69449	15	15	1.14905	-0.403856		0.725238	-0.351468	14	23	1.17517	-1.34826	0.608387	0.251265
CNAG_00524	5	10	0.968444	0.530416	0.999845	0.583898	0.547699	68	57	8.96252	1.08321	-0.392461	0.922404	0.717118	-0.362314	9	1	2.35104	1.93119		0.411408	0.821418	2	1	2.6048	-2.07761		0.425099	-0.797607	29	36	2.31604	1.11873		0.629072	0.483034	28	29	2.24734	1.55445		0.489135	0.691685	61	60	2.22795	1.56578		0.482185
CNAG_00525	5	20	0.714977	0.0976115	0.999845	0.891407	0.136524	85	49	10.3168	0.787651	0.0943581	0.974578	0.904644	0.119797	12	6	0.921896	-1.4799	0.304755	0.108433	-1.60527	13	6	0.622167	0.305835	0.915644	0.623027	0.491564	28	33	0.67745	-0.660361	0.631808	0.329672	-0.974775	32	47	0.624768	-0.168814	0.902965	0.787004	-0.270203	61	69	0.6132	-0.246324	0.887372	0.687904
CNAG_00526	1	3	1.17534	0.802607	0.999845	0.494687	0.682874	18	18	3.32811	1.32449	0.873313	0.83117	0.509664	0.659361	3	2	1.81582	-1.71134		0.345956	-0.942462	3	1	1.33989	-0.161138		0.904276	-0.120262	13	4	1.83636	-2.91255		0.112729	-1.58605	6	3	1.29306	0.202967		0.875271	0.156966	11	5	1.28687	-0.0652907		0.959536
CNAG_00527	15	76	0.496305	-0.204783	0.999845	0.679889	-0.412614	224	152	37.5319	0.520062	0.405971	0.78264	0.435026	0.780621	44	30	0.614192	-1.76451	0.0578301	0.00406723	-2.8729	17	6	0.58547	0.837827	0.55401	0.152421	1.43103	85	86	0.590501	-0.769625	0.490339	0.192457	-1.30334	107	152	0.585591	0.367601	0.740117	0.530171	0.627744	219	272	0.58493	0.443338	0.77782	0.448491
CNAG_00528	5	19	0.732038	0.732982	0.999845	0.316687	1.00129	79	121	14.6078	0.818399	-0.0721238	0.984769	0.929775	-0.0881279	6	8	1.04762	2.30289		0.0279345	2.1982	5	3	1.73797	-4.0809	0.151807	0.0188705	-2.34808	49	45	1.21519	-0.616604		0.611865	-0.507414	22	24	1.16642	-0.751142	0.73052	0.519592	-0.643975	43	35	1.02043	0.904908	0.723109	0.375192
CNAG_00529	6	7	1.01389	0.701293	0.999845	0.489134	0.691686	51	87	14.0723	1.03287	1.90867	0.329306	0.0646133	1.84792	18	20	1.42289	-2.07043	0.348855	0.145645	-1.45509	13	10	1.28746	0.202768	0.972765	0.874855	0.157494	35	40	1.28645	0.425334	0.895942	0.740928	0.330625	26	18	1.277	1.8316	0.354547	0.151489	1.43429	33	35	1.27833	0.951604	0.78024	0.456629
CNAG_00531	12	223	0.749966	0.837813	0.999845	0.263937	1.11713	822	750	89.1129	0.764989	-0.289865	0.920729	0.704752	-0.378913	83	23	1.17896	-0.993287		0.399504	-0.842508	57	45	0.963539	-0.543455	0.89573	0.572741	-0.56402	420	375	0.927338	0.0965294		0.917096	0.104093	384	331	1.02868	-1.63358		0.112279	-1.58803	752	797	0.935544	-0.948452	0.671344	0.31068
CNAG_00532	4	5	1.16393	-0.0115404	0.999845	0.992089	-0.00991504	28	29	9.25751	1.19173	1.54789	0.555058	0.193991	1.29886	5	13	2.90775	-1.86162		0.522026	-0.640226	5	1	2.88399	-1.58052		0.583669	-0.548034	6	12	2.90775	-2.99435		0.303113	-1.02978	20	21	2.59241	0.557086		0.829852	0.214891	29	39	2.67817	-1.05768		0.692898
CNAG_00533	12	60	0.497564	0.245696	0.999845	0.621449	0.493798	203	205	34.4144	0.533225	0.225133	0.906736	0.672871	0.422211	28	23	0.544061	-0.183068	0.851901	0.736506	-0.336484	36	22	0.511624	-0.76932	0.520004	0.132663	-1.50368	85	67	0.522795	-0.927511	0.308719	0.0760401	-1.77414	126	144	0.489934	-0.567391	0.480747	0.246824	-1.1581	269	257	0.470436	-0.105555	0.946482	0.822465
CNAG_00534	23	48	0.493503	0.0868215	0.999845	0.86035	0.175929	251	184	41.4821	0.53139	-0.0832798	0.968419	0.875465	-0.156721	32	19	0.5799	1.1536	0.191898	0.0466674	1.98931	21	23	0.57939	-0.0612941	0.982864	0.915748	-0.105791	103	61	0.555943	1.08828	0.239568	0.0502844	1.95754	99	140	0.559579	0.367747	0.724286	0.511062	0.657185	218	231	0.5554	0.214612	0.894123	0.699194
CNAG_00535	9	29	0.530616	0.0882725	0.999845	0.867875	0.166359	107	102	17.1817	0.602229	-0.123359	0.954912	0.837699	-0.204838	15	9	1.52383	1.09826		0.471078	0.720727	15	5	1.69591	-1.22205	0.836958	0.471163	-0.720589	32	53	1.61364	-0.703017		0.663075	-0.435671	66	81	1.45972	0.195099		0.893675	0.133655	135	172	1.42622	0.365605	0.934449	0.797683
CNAG_00536	12	35	0.514746	-0.200854	0.999845	0.696388	-0.390201	110	106	18.9724	0.588541	-0.460365	0.782138	0.434089	-0.782214	15	9	2.86713	2.77139		0.33374	0.966608	12	4	3.00811	-0.636673		0.832378	-0.211652	27	38	2.80348	2.13089		0.447201	0.76009	73	39	2.98415	0.341856		0.908796	0.114557	115	102	2.67605	3.43471		0.199317
CNAG_00537	1	3	1.4186	1.75406	0.999845	0.216282	1.23648	27	43	4.06202	1.56611	0.760084	0.890232	0.627441	0.485332	1	3	1.03758	0.212341		0.837845	0.204651	1	3	0.939555	0.0373814	0.991561	0.968264	0.0397863	13	21	0.919134	0.455739		0.620011	0.495835	17	22	0.894542	0.477803	0.788356	0.593251	0.534131	32	34	0.870271	0.842348	0.688555	0.333087
CNAG_00538	17	27	0.6762	-0.615513	0.999845	0.362689	-0.910252	102	77	23.8309	0.752261	-0.98399	0.550422	0.190858	-1.30804	16	4	2.76315	-0.859595		0.75573	-0.311093	8	5	2.76315	-2.07735		0.452167	-0.751807	53	53	2.56794	0.459899		0.857865	0.179093	66	67	2.39415	2.52034		0.292474	1.05271	153	102	2.50531	0.0858889		0.972652
CNAG_00539	4	131	0.872918	1.04476	0.999845	0.231362	1.19686	478	523	54.8777	0.891509	0.0305834	0.993906	0.972634	0.0343052	55	17	1.0349	-0.40252		0.697317	-0.388945	47	35	0.824546	0.552239	0.857715	0.503018	0.669749	236	261	0.914864	-0.622679		0.496109	-0.680624	235	200	0.836052	-0.0797615	0.967994	0.923995	-0.0954026	503	444	0.804881	0.218912	0.933327	0.785637
CNAG_00540	1	3	1.43153	-0.198251	0.999845	0.889854	-0.138489	4	14	2.39493	1.7249	-0.426484		0.804713	-0.247252	1	1	2.43701	1.59022		0.514058	0.652532	2	1	2.32388	1.41996		0.541181	0.611029	7	4	2.43701	0.45592		0.851596	0.187082	4	4	2.61315	-1.08989		0.67662	-0.41708	5	5	2.2977	1.01282		0.659361
CNAG_00541	1	6	1.26611	-0.526023	0.999845	0.677803	-0.415464	12	11	2.11804	1.49817	-0.578918		0.699187	-0.386418	2	1	0.972204	-0.784752		0.419558	-0.807188	2	1	0.953297	-1.79354	0.333703	0.0599172	-1.8814	4	2	1.00423	-2.22665		0.0266054	-2.21726	11	6	1.01144	-2.78221	0.0361887	0.00594583	-2.75075	9	3	0.894776	-1.69778	0.292563	0.0577702
CNAG_00542	0	1	1.64514	2.78099	0.991645	0.0909455	1.69043	16	22	3.48336	1.6842	4.04798	0.147967	0.0162388	2.4035	5	6	1.36657	1.90803		0.162648	1.39622	2	1	1.35986	0.778816	0.893146	0.566837	0.572716	13	4	1.86105	-2.17539		0.242442	-1.16891	7	6	1.41336	-0.282395		0.841634	-0.199803	16	3	1.36802	-0.150497		0.912401
CNAG_00543	5	15	0.71559	-0.111295	0.999845	0.876404	-0.155529	53	44	8.01199	0.825174	-0.284861	0.926694	0.729934	-0.345214	9	3	0.62535	-0.692666	0.489149	0.268015	-1.10765	7	7	0.577787	0.376166	0.866939	0.515016	0.651047	21	21	0.594283	-0.736929	0.519906	0.214964	-1.24003	25	30	0.582919	-0.514352	0.617674	0.377575	-0.882374	70	59	0.57229	0.39278	0.797049	0.492505
CNAG_00544	20	54	0.519739	0.678088	0.999845	0.192005	1.30467	244	396	54.5758	0.534262	1.20636	0.186374	0.0239457	2.258	79	44	0.935698	1.27899	0.377748	0.171661	1.36689	39	23	0.87139	1.2097	0.575706	0.165062	1.38825	152	125	0.868193	1.3888	0.372113	0.109678	1.59964	119	90	0.847756	1.5975	0.193147	0.0595128	1.88439	248	132	0.846665	1.24065	0.474692	0.142829
CNAG_00545	10	25	0.582057	0.210345	0.999845	0.717815	0.361381	101	119	16.0516	0.641199	0.0940943	0.970379	0.883331	0.146747	17	10	0.717665	0.757847	0.511379	0.290972	1.05599	9	4	0.627374	1.46999	0.152868	0.0191253	2.34308	49	42	0.682209	0.1496	0.921092	0.826426	0.219288	72	48	0.618969	1.46065	0.086432	0.0182841	2.35981	114	106	0.620533	0.973617	0.424999	0.116647
CNAG_00546	9	63	0.557926	0.776928	0.999845	0.163763	1.39253	247	307	34.9408	0.585133	0.593162	0.691257	0.310716	1.01372	35	27	0.515213	-0.152541	0.873189	0.767174	-0.296073	42	11	0.501058	-0.953108	0.323995	0.0571463	-1.90219	158	105	0.570295	-2.34454	0.00162609	3.93796e-05	-4.11109	103	80	0.503557	-1.44106	0.0274283	0.00421287	-2.86177	167	159	0.493503	-1.47548	0.0266332	0.00279155
CNAG_00547	16	29	0.619238	-0.435521	0.999845	0.481858	-0.703317	89	109	27.8101	0.656516	0.118157	0.959927	0.857172	0.179976	35	8	0.903272	-0.210629		0.815618	-0.233184	24	9	0.731478	0.857804	0.672367	0.240916	1.1727	51	28	0.77777	-0.020523	0.989173	0.978949	-0.026387	116	105	0.757254	-0.15472	0.931541	0.838105	-0.204318	128	155	0.73473	-0.0429888	0.993578	0.953343
CNAG_00549	310	2466	0.868575	-6.38094	2.74524e-11	2.03537e-13	-7.34645	122	19	1716.62	0.860189	1.75925	0.255628	0.0408363	2.04519	2231	2390	0.918595	1.07684	0.458867	0.241089	1.17227	2066	984	0.919714	-7.11212	5.03022e-13	1.05067e-14	-7.73297	18	14	0.918625	-2.13218	0.137534	0.0202838	-2.32106	630	553	0.918689	-4.05383	0.000121562	1.02127e-05	-4.41262	307	53	0.91988	-8.11066	6.89639e-17	1.17477e-18
CNAG_00550	1	2	1.2927	0.518854	0.999845	0.688147	0.401371	9	14	3.96913	1.3499	2.1009	0.44072	0.119628	1.55634	8	2	1.1578	0.237211		0.837666	0.20488	4	1	1.02482	0.217539	0.960783	0.831896	0.212271	9	11	1.11475	-0.587136		0.598403	-0.526698	9	6	1.16926	-1.45174		0.214387	-1.24159	15	9	0.999518	-0.231282	0.945348	0.817009
CNAG_00551	17	64	0.449284	0.0830352	0.999845	0.853373	0.184817	209	223	37.7723	0.489281	-0.0471399	0.982031	0.923246	-0.0963452	32	20	2.34825	-2.43939		0.298893	-1.03881	32	18	1.90041	1.33341		0.4829	0.701646	108	60	2.05975	-0.757544		0.713034	-0.367784	122	125	2.03843	-1.08964		0.592961	-0.53455	232	254	2.09233	-1.88513		0.367604
CNAG_00554	4	17	0.776137	0.413439	0.999845	0.59425	0.532688	65	73	7.29989	0.905871	-0.564538	0.84465	0.533154	-0.623199	8	2	1.33343	2.27196		0.0884087	1.70385	6	2	1.40379	0.382519	0.950745	0.785246	0.272489	38	23	1.30503	1.53065		0.24084	1.17289	39	36	1.24113	2.61724	0.134458	0.0349656	2.10876	64	72	1.24841	1.92444	0.435107	0.123193
CNAG_00555	2	22	0.806181	0.0897169	0.999845	0.911389	0.111286	49	62	10.727	0.850413	0.813343	0.715643	0.338865	0.956409	17	8	2.30017	1.39644		0.543784	0.607101	13	8	2.26945	0.364776		0.872303	0.160733	39	23	2.44882	-0.601636		0.805927	-0.245684	50	29	2.15176	0.963118		0.654445	0.447596	78	88	2.13494	0.774478		0.716782
CNAG_00556	12	44	0.561796	-0.514346	0.999845	0.359909	-0.915539	114	85	17.7615	0.648226	-0.989837	0.453769	0.126763	-1.52699	15	5	1.26356	-0.769346		0.54261	-0.60887	18	2	0.982769	0.73769	0.82864	0.452879	0.750624	41	35	1.00828	0.30068		0.765541	0.298212	66	86	0.983579	0.315191		0.748625	0.320453	133	138	0.97448	0.150983	0.963821	0.876871
CNAG_00557	4	12	0.832759	0.361095	0.999845	0.664569	0.433613	63	45	10.6197	0.891426	0.731873	0.767658	0.411639	0.821013	13	6	0.79918	-1.54029	0.206471	0.0539377	-1.92734	9	5	0.754547	0.641452	0.792026	0.395261	0.850115	32	26	0.763962	-0.833097	0.58264	0.275495	-1.0905	38	48	0.816249	-3.62797	0.000107753	8.80183e-06	-4.44469	61	93	0.754139	-0.0289457	0.99709	0.969383
CNAG_00558	15	20	0.787618	-0.924266	0.999845	0.240597	-1.1735	69	52	15.9699	0.831764	-0.262862	0.93312	0.75198	-0.31603	13	11	0.694897	0.328003	0.785177	0.636915	0.472017	12	10	0.617054	0.538377	0.787184	0.382938	0.872496	38	22	0.631029	0.264049	0.865882	0.675624	0.418443	37	40	0.615921	0.165599	0.903604	0.788034	0.268865	64	64	0.591534	0.739864	0.562797	0.211024
CNAG_00559	8	57	0.698278	0.640991	0.999845	0.35864	0.91796	242	208	25.136	0.75035	-0.450113	0.852288	0.548592	-0.599871	25	6	0.830193	-2.36971	0.0598955	0.00431171	-2.85441	16	10	0.623721	0.149855	0.956018	0.810129	0.240259	126	108	0.668155	-1.48976	0.159115	0.0257698	-2.22966	141	143	0.62159	-0.0829773	0.951841	0.893804	-0.133492	340	335	0.619949	-0.349123	0.833692	0.573334
CNAG_00560	8	35	0.558515	0.162575	0.999845	0.770987	0.291084	105	131	17.227	0.641147	-0.472793	0.801485	0.460869	-0.737417	15	6	0.63139	0.625737	0.538929	0.321663	0.991046	15	2	0.57425	0.803624	0.569773	0.161684	1.39943	51	45	0.579697	0.698345	0.533557	0.22833	1.20467	69	78	0.560677	1.05068	0.195773	0.0609369	1.87395	181	158	0.563226	0.499943	0.722948	0.374734
CNAG_00561	8	27	0.587991	-0.0720638	0.999845	0.902456	-0.122559	85	86	16.2965	0.680917	-0.514818	0.793175	0.44961	-0.756065	8	8	1.31899	0.110438		0.933272	0.0837293	5	2	1.08444	1.19819	0.708498	0.269206	1.10489	32	27	1.07506	1.50935		0.16033	1.40396	36	52	1.05876	1.48036	0.369803	0.162053	1.3982	102	120	1.04292	1.73481	0.387215	0.0962289
CNAG_00562	9	17	0.821445	-0.29559	0.999845	0.718965	-0.359842	61	64	13.0732	0.886711	-0.227544	0.94318	0.797475	-0.256616	5	10	1.11186	-0.248731		0.822985	-0.223708	5	4	0.923586	0.479496	0.909955	0.603644	0.519168	28	27	0.916166	0.724139		0.429294	0.790401	40	31	0.89201	0.860387	0.574027	0.334771	0.964549	63	84	0.889725	0.530839	0.82206	0.550753
CNAG_00563	5	31	0.65504	0.185925	0.999845	0.776535	0.283837	89	101	12.9686	0.725944	-0.131828	0.959384	0.8559	-0.181596	12	8	3.11414	1.25135		0.687811	0.401827	11	6	3.32229	-1.67966		0.613155	-0.505575	52	31	3.17378	-0.538045		0.865381	-0.169528	50	46	3.09792	-0.155471		0.959974	-0.0501857	90	86	3.10531	-0.674745		0.827985
CNAG_00564	5	4	0.959495	0.601078	0.999845	0.531019	0.626452	47	45	8.46046	1.03854	0.610543	0.855887	0.556607	0.587889	7	5	1.76197	-2.26992		0.197646	-1.28829	13	1	1.19301	0.179785		0.880213	0.150699	32	23	1.76896	-3.39639		0.0548589	-1.91999	23	23	1.53456	-2.94311		0.0551252	-1.91789	26	38	1.17094	-0.0931158		0.936617
CNAG_00565	25	115	0.431118	0.28174	0.999845	0.513427	0.653511	408	413	54.5741	0.472203	-0.676277	0.498853	0.152094	-1.43217	48	13	1.66913	-3.44287		0.0391437	-2.06267	58	22	0.877244	1.78808	0.264986	0.0415211	2.03829	184	156	1.3211	-2.15961		0.102111	-1.6347	265	241	1.11223	-1.6723	0.327319	0.132695	-1.50356	479	500	0.964474	-0.828412	0.734044	0.390381
CNAG_00566	4	33	0.753987	0.305379	0.999845	0.685464	0.405019	111	91	12.8608	0.845959	-0.630859	0.795574	0.455829	-0.745733	6	7	2.18026	-1.66		0.446433	-0.761375	14	6	1.8411	-0.613345		0.739028	-0.333141	41	64	2.20691	-2.93129		0.184101	-1.32823	42	58	1.79728	-0.300325		0.867291	-0.1671	125	119	2.00503	-2.77188		0.16683
CNAG_00567	8	17	0.663236	-0.556951	0.999845	0.40105	-0.839748	41	54	12.7197	0.696985	0.826449	0.610924	0.235722	1.18575	21	12	2.24062	1.61292		0.471613	0.719858	9	2	2.54981	-1.66322		0.514212	-0.652293	19	16	2.50942	-1.45559		0.56188	-0.580051	22	20	2.2862	-0.51401		0.82211	-0.224832	52	37	2.22039	-0.155853		0.944041
CNAG_00568	0	5	1.42788	0.663731	0.999845	0.642048	0.464837	13	20	2.48346	1.53366	1.08656		0.478649	0.708478	4	2	1.17552	2.48093		0.034816	2.11049	11	3	1.18535	1.08826	0.76894	0.358573	0.918088	7	11	1.2416	0.445051	0.885236	0.720006	0.358451	12	5	1.18268	0.724593	0.748401	0.540096	0.612669	13	11	1.12192	2.00278	0.340311	0.0742379
CNAG_00569	7	20	0.60998	0.583427	0.999845	0.338835	0.956469	124	90	14.3194	0.671571	0.394179	0.856136	0.557237	0.586951	16	9	1.27858	-1.91124		0.134963	-1.49482	9	4	0.863957	-0.323465	0.940609	0.708107	-0.3744	50	36	0.871187	-0.349714		0.68811	-0.401422	68	70	0.876087	-0.919247		0.294056	-1.04926	141	142	0.837691	-0.630761	0.778466	0.451465
CNAG_00570	10	33	0.611363	0.00289892	0.999845	0.996217	0.00474173	117	106	17.9623	0.681049	-0.412928	0.851027	0.544308	-0.606311	19	5	0.9272	-0.90695	0.54013	0.327996	-0.978159	3	4	0.691706	0.772221	0.700333	0.264251	1.1164	49	41	0.676226	1.49623	0.163083	0.0269237	2.21262	47	79	0.661383	2.0129	0.0165286	0.0023387	3.04347	189	145	0.6606	1.68562	0.0865095	0.0107216
CNAG_00571	3	14	0.797467	-0.39965	0.999845	0.616266	-0.501149	33	30	6.02478	0.90952	-0.187074	0.954869	0.837037	-0.205685	7	3	0.690895	-0.329401	0.78316	0.633522	-0.476775	11	5	0.544191	2.4501	0.000104308	6.72316e-06	4.50227	6	7	0.681252	-1.35498	0.228865	0.0467057	-1.98896	10	9	0.66931	-1.70849	0.0577896	0.0106918	-2.55261	19	28	0.571217	-0.147411	0.934449	0.796357
CNAG_00572	5	16	0.716261	0.176378	0.999845	0.80549	0.246248	65	58	10.3035	0.768157	0.712315	0.72546	0.353769	0.927303	21	5	1.17644	1.2072		0.304822	1.02615	9	3	1.17708	-0.0239659	0.996393	0.983756	-0.0203604	31	22	1.72785	-2.91251		0.091868	-1.68563	45	44	1.14618	0.0154125	0.995137	0.989271	0.0134468	65	64	1.09114	1.00157	0.70932	0.358667
CNAG_00573	10	32	0.514798	0.0921337	0.999845	0.857961	0.178971	118	114	19.8269	0.599083	-0.453841	0.792856	0.448715	-0.75756	16	6	0.852323	-0.263935	0.865086	0.756816	-0.309665	17	4	0.755017	-0.434116	0.891779	0.565308	-0.574975	46	41	0.704389	0.633829	0.663325	0.368212	0.899828	53	93	0.682603	0.863938	0.428321	0.205638	1.26565	127	190	0.676589	0.739097	0.633829	0.274663
CNAG_00574	1	16	0.897778	0.0794393	0.999845	0.929492	0.0884844	41	36	9.52759	0.952413	0.850396	0.738793	0.371918	0.892886	10	7	1.1213	-0.608793		0.587174	-0.542935	2	2	1.08043	-1.44901	0.597181	0.179875	-1.34114	10	13	1.04404	-0.93345		0.37128	-0.894078	24	17	1.13416	-2.33762	0.145438	0.0392927	-2.06111	39	30	0.97893	-0.574495	0.826537	0.557298
CNAG_00575	7	114	0.710548	0.977039	0.999845	0.169116	1.37505	493	432	43.9323	0.741201	-0.357768	0.891687	0.629318	-0.482686	32	17	1.55621	-0.541585		0.727829	-0.348015	32	25	1.20395	1.23234	0.739723	0.306036	1.02358	225	234	1.34242	-0.485019		0.717873	-0.361303	182	186	1.20757	0.74467		0.537452	0.61667	512	435	1.25727	-0.521458	0.884508	0.678323
CNAG_00576	4	22	0.744351	0.115086	0.999845	0.877127	0.154613	56	77	10.8796	0.834279	-0.229953	0.939603	0.782831	-0.275631	6	7	1.12735	2.2084	0.198746	0.0501208	1.95893	8	4	1.2109	0.0867827	0.988297	0.942866	0.0716681	51	28	1.11469	1.27546	0.561619	0.252527	1.14423	35	28	1.08706	1.32567	0.450871	0.222654	1.2195	67	79	1.04325	2.64725	0.0890854	0.0111647
CNAG_00577	1	7	1.05576	-0.0980741	0.999845	0.925988	-0.0928942	12	23	4.45817	1.12845	1.0208	0.736368	0.365676	0.904603	6	4	1.37328	1.20509		0.380199	0.87753	3	4	1.85109	-2.23766	0.657158	0.226725	-1.20884	5	8	1.36514	0.147984		0.913677	0.108402	20	9	1.46519	-1.08758		0.457918	-0.742279	18	35	1.29316	0.118575		0.926941
CNAG_00580	12	39	0.61364	-0.386286	0.999845	0.529022	-0.629499	109	94	20.6559	0.656882	-0.0375599	0.989641	0.954403	-0.057179	26	10	0.933713	0.976838		0.295475	1.04619	23	10	0.889114	0.523876	0.889075	0.55572	0.589211	48	36	1.17473	-2.01354		0.0865194	-1.71405	62	73	0.920611	-0.460235	0.798495	0.617129	-0.499924	121	129	0.879513	-0.0570396	0.99195	0.94829
CNAG_00581	256	750	0.388544	-0.0402945	0.999845	0.917403	-0.103706	2582	2701	317.885	0.400062	-1.57883	0.00173403	7.93146e-05	-3.94646	171	78	0.678116	0.866139	0.41466	0.201506	1.27727	147	138	0.719631	-2.47472	0.0070282	0.000584127	-3.43888	1183	1032	0.69497	-1.47968	0.18698	0.0332433	-2.12913	1539	1135	0.668887	0.936077	0.36924	0.161677	1.39946	2627	2502	0.66801	0.879481	0.5337	0.187983
CNAG_00582	6	21	0.674525	-0.0434641	0.999845	0.948623	-0.0644365	76	58	13.6002	0.733115	0.303704	0.909044	0.67868	0.414265	10	11	1.91423	3.08215		0.10737	1.61013	17	6	1.74203	3.36843	0.309472	0.053159	1.93363	41	42	1.72762	3.67466		0.0334197	2.127	43	31	1.7945	2.34229		0.191802	1.30527	54	68	1.66691	4.43931		0.00774018
CNAG_00583	13	80	0.525532	0.328243	0.999845	0.532239	0.624592	303	232	54.6917	0.538146	1.22513	0.180427	0.022812	2.27657	66	57	0.917146	1.43343		0.118071	1.56292	56	21	0.894662	0.566353	0.871045	0.526711	0.633035	139	119	0.918765	0.279402		0.761047	0.304106	171	172	0.87479	0.543144	0.74425	0.534675	0.620885	296	339	0.848917	0.846195	0.67737	0.318865
CNAG_00584	17	34	0.655808	-0.290632	0.999845	0.657645	-0.443167	130	115	30.4406	0.708794	-0.524516	0.799967	0.459293	-0.740012	11	14	0.861599	0.180776	0.898589	0.833812	0.209815	21	7	0.824963	-0.649271	0.813333	0.431264	-0.78703	73	55	0.724671	1.40226	0.246221	0.0529872	1.93502	61	87	0.714319	1.36738	0.185592	0.0555885	1.91425	150	156	0.705206	1.53818	0.186668	0.02917
CNAG_00585	4	9	1.1232	0.448122	0.999845	0.689916	0.398969	50	50	7.19013	1.22228	-0.146765	0.974548	0.904424	-0.120075	1	6	0.862007	0.901905		0.295429	1.04629	9	3	0.875558	-0.487	0.900283	0.578063	-0.556217	13	16	0.801274	0.927565		0.247022	1.15761	32	31	0.951504	-1.6411	0.243251	0.0845747	-1.72474	42	64	0.816706	-0.356407	0.877249	0.662549
CNAG_00586	4	26	0.637646	0.740773	0.999845	0.245345	1.16173	97	136	15.6767	0.70861	0.182847	0.94318	0.796379	0.258036	13	8	6.73636	0.905172		0.893109	0.134371	9	12	6.68226	0.502754		0.940026	0.075237	108	109	6.76629	-1.99094		0.768572	-0.294243	38	19	6.75692	-1.11825		0.868553	-0.165497	91	62	6.76629	-2.88979		0.669316
CNAG_00587	1	4	1.7048	-0.930596	0.999845	0.585158	-0.545866	4	9	1.23587	1.94625	-0.661123		0.734089	-0.339691	1	1	1.94623	-1.46409		0.451888	-0.75227	3	0	1.49783	0.107525		0.942771	0.071787	10	6	1.57692	-0.635914		0.686755	-0.403263	2	1	1.74637	-2.14981		0.218316	-1.23102	7	6	1.50496	-0.796925		0.596435
CNAG_00588	2	10	1.16187	-0.416422	0.999845	0.720039	-0.358406	19	24	3.25688	1.30436	-0.475451		0.715478	-0.364509	2	3	1.90816	-1.86158		0.329268	-0.97559	5	8	1.30705	2.17261	0.446634	0.0964672	1.66223	13	9	1.35181	1.40673		0.298049	1.04063	64	57	1.29125	2.23722		0.0831667	1.7326	14	22	1.31932	1.07749	0.756196	0.414101
CNAG_00589	1	18	1.03488	0.146287	0.999845	0.887588	0.141357	32	54	6.71772	1.16341	-0.530648	0.897037	0.648309	-0.456113	4	3	3.5896	-0.858868		0.8109	-0.239266	4	5	3.388	0.996572		0.768645	0.294148	28	21	3.37375	1.32771		0.69392	0.393541	23	33	3.5896	-2.48605		0.488579	-0.69257	44	50	3.4416	-0.434695		0.89949
CNAG_00590	8	28	0.573129	0.0152056	0.999845	0.978834	0.0265308	104	82	17.1204	0.643203	-0.102476	0.968387	0.873415	-0.159322	15	8	1.23602	0.478687		0.698549	0.387279	11	10	1.13702	0.350277	0.94877	0.758033	0.308065	51	33	1.35213	-1.40517		0.2987	-1.03922	52	64	1.27322	-1.42146		0.264239	-1.11643	94	128	1.12504	-0.260339		0.817001
CNAG_00591	0	2	1.68988	0.588145	0.999845	0.72781	0.34804	11	3	2.59337	1.76158	2.18807		0.214198	1.24211	2	3	0.492397	0.282675	0.729947	0.565914	0.57408	4	3	0.453704	0.203262	0.927411	0.65415	0.448005	15	5	0.450025	0.465791	0.61392	0.300653	1.03503	13	4	0.437416	0.730154	0.26271	0.0950694	1.66924	7	10	0.438273	0.258482	0.825125	0.555343
CNAG_00592	3	9	1.06854	0.0429305	0.999845	0.967952	0.0401768	31	34	4.83703	1.21732	-0.512149	0.907201	0.67396	-0.42072	1	4	6.76668	0.581073		0.931568	0.0858726	6	2	6.65232	2.74178		0.680226	0.412155	19	10	6.75494	0.797923		0.905969	0.118124	13	14	6.76668	-1.04608		0.877142	-0.154593	26	27	6.76668	-1.45049		0.830268
CNAG_00593	2	6	1.08099	0.227752	0.999845	0.833131	0.210688	27	22	3.98204	1.15505	0.944482	0.768721	0.41353	0.817697	5	5	0.67815	0.441369	0.688297	0.515149	0.650842	5	1	0.6119	0.846286	0.579618	0.166651	1.38305	12	6	0.604462	1.30447	0.180216	0.0309231	2.15806	15	12	0.591663	1.73181	0.0230852	0.00342222	2.92702	34	33	0.588297	1.70985	0.0339764	0.00365573
CNAG_00594	4	43	0.771726	0.289717	0.999845	0.707352	0.375415	156	87	17.3368	0.826119	-0.162154	0.955718	0.844387	-0.196285	21	5	1.44089	1.80161		0.211173	1.25035	15	8	1.47046	0.335656	0.957055	0.819439	0.228266	41	46	1.38167	1.36203		0.32424	0.985783	69	63	1.35511	1.31083		0.333383	0.967322	131	146	1.30891	2.25045	0.364474	0.0855542
CNAG_00595	1	8	0.941878	0.459679	0.999845	0.625518	0.488045	31	27	6.65074	0.994483	1.52854	0.448641	0.124289	1.53702	15	3	1.77791	1.59598		0.369361	0.897671	9	4	1.73078	0.922516		0.594029	0.533006	21	21	1.74615	0.814743		0.640791	0.466593	16	15	2.17301	-3.48409		0.108859	-1.60334	41	37	1.78573	-0.517069		0.772155
CNAG_00596	3	6	1.02151	-0.664227	0.999845	0.515538	-0.650238	20	12	3.96378	1.18688	-0.418811	0.924355	0.724187	-0.352868	3	2	1.36652	2.05947		0.131788	1.50709	2	0	1.59282	-0.639212	0.93703	0.688193	-0.401309	17	9	1.42011	0.435445		0.759128	0.306627	21	14	1.36387	0.466829		0.732139	0.342282	25	28	1.25768	2.16862	0.3629	0.0846535
CNAG_00597	19	40	0.55103	0.226023	0.999845	0.681672	0.410182	235	163	33.2767	0.5742	0.682891	0.610585	0.234325	1.18929	59	19	1.2003	-2.66365	0.149718	0.0264767	-2.21915	20	8	0.65765	0.280295	0.932147	0.669956	0.426208	78	67	0.8515	-2.18116	0.091887	0.0104207	-2.56155	110	97	0.696134	-1.01601	0.3467	0.144425	-1.45951	198	277	0.662525	-0.673202	0.67055	0.309574
CNAG_00598	1	6	1.05342	1.06091	0.999845	0.313878	1.00712	34	36	4.43326	1.32138	-0.480099	0.922235	0.716356	-0.363333	1	2	2.59252	-2.30062		0.374861	-0.887405	4	0	2.3567	-1.89058		0.422428	-0.802216	12	7	2.63131	-4.80034		0.0681041	-1.82432	17	6	2.63131	-5.2948		0.0441957	-2.01223	21	5	2.58766	-4.16794		0.107245
CNAG_00599	1	12	0.794248	0.959128	0.999845	0.227204	1.20759	57	58	9.88213	0.84288	1.5354	0.339277	0.0685132	1.82162	15	8	1.94359	3.09839		0.110899	1.59416	7	0	1.86824	2.40506	0.615528	0.197977	1.28734	32	22	1.74815	3.9455		0.0240112	2.25695	23	25	1.87418	1.94414		0.299583	1.03733	74	68	1.71082	4.08826	0.122195	0.0168647
CNAG_00600	40	62	0.544304	-0.647364	0.999845	0.234305	-1.18934	209	206	44.6003	0.579158	-0.760946	0.547348	0.188885	-1.31388	35	17	0.962691	0.243723		0.800138	0.253169	31	16	0.873368	0.0502504	0.989319	0.954118	0.0575364	90	98	0.977958	-1.01271		0.300419	-1.03554	100	90	0.930394	-1.07382	0.482514	0.248435	-1.15416	207	229	0.814918	0.601374	0.782155	0.46054
CNAG_00601	0	3	1.33795	1.13087	0.999845	0.397986	0.845223	17	13	6.34935	1.34996	3.61606	0.0862117	0.00739226	2.67864	7	12	1.16855	1.77092		0.129648	1.51549	13	5	1.18779	0.360454	0.94877	0.761535	0.303466	4	10	1.32163	-0.55095		0.676773	-0.416871	9	11	1.16299	0.21344	0.933695	0.854384	0.183528	12	8	1.06511	1.85699	0.354657	0.0812511
CNAG_00602	44	103	0.421832	-0.276734	0.999845	0.511805	-0.656029	382	306	60.0571	0.456507	-0.72744	0.428627	0.11105	-1.59349	48	21	3.05994	0.581084		0.849387	0.189901	46	16	2.77584	3.10835		0.262805	1.11979	159	129	2.91765	1.66249		0.568811	0.569804	234	282	2.80839	2.19337		0.4348	0.781004	430	489	2.74499	3.04927		0.266633
CNAG_00603	2	4	1.15509	-0.0242408	0.999845	0.983257	-0.0209861	23	10	4.73129	1.23153	1.02505	0.763323	0.405215	0.832343	3	5	1.66333	-0.138819		0.933487	-0.0834584	2	1	1.46589	-0.189449		0.897169	-0.129238	5	5	1.61519	-1.04702		0.516833	-0.648236	12	10	1.35967	0.698669		0.607355	0.513852	12	30	1.34962	0.496728		0.712836
CNAG_00604	2	13	0.93368	-0.508669	0.999845	0.585891	-0.5448	23	26	5.69688	1.00848	0.347184	0.926694	0.730647	0.344265	8	4	0.925765	-1.78294	0.206907	0.0541161	-1.92591	5	4	0.708975	-0.346849	0.915891	0.624682	-0.489226	8	11	0.711635	-0.326816	0.857944	0.646057	-0.459246	21	17	0.687007	0.117064	0.937009	0.864698	0.170397	30	26	0.691719	-0.520099	0.778466	0.452115
CNAG_00605	3	71	0.975456	0.704184	0.999845	0.470355	0.721902	201	248	23.623	1.01701	-0.49467	0.889928	0.626686	-0.486396	21	7	1.689	-3.18416		0.0593984	-1.88523	14	8	0.953203	0.964509	0.746027	0.311604	1.01186	132	144	1.00517	0.242614		0.809271	0.241366	120	117	0.959183	0.440803		0.645832	0.45956	300	310	0.940222	0.439255	0.86487	0.64037
CNAG_00606	6	16	0.632469	0.944869	0.999845	0.135192	1.49394	104	121	18.8945	0.717175	0.185069	0.94318	0.796366	0.258053	12	6	2.13796	0.591263		0.782121	0.276556	16	3	1.76413	1.92381	0.712252	0.275488	1.09051	42	32	1.72625	2.69535		0.118431	1.56139	56	41	1.69736	3.06317		0.0711272	1.80466	68	79	1.71178	2.16454		0.206051
CNAG_00607	4	6	1.17116	-0.450075	0.999845	0.700758	-0.384298	19	26	8.24677	1.24234	0.328123	0.942314	0.791689	0.264118	1	7	2.93477	-1.86162		0.525864	-0.634333	3	2	2.91112	-1.57948		0.587427	-0.542568	11	7	2.71503	-0.222277		0.934751	-0.0818692	33	23	2.63044	0.396256		0.880258	0.150643	23	29	2.65553	-0.436042		0.869573
CNAG_00608	12	17	0.760023	-0.36777	0.999845	0.628461	-0.483894	85	58	12.8714	0.877914	-1.21494	0.518614	0.166393	-1.38389	8	3	2.02688	3.812		0.0600092	1.88073	16	3	2.14172	1.74707		0.414653	0.815734	28	22	2.04245	2.53269		0.214966	1.24002	45	59	1.92521	3.77173		0.0500977	1.95913	109	125	1.93289	3.16778		0.101238
CNAG_00609	11	16	0.771899	-0.112539	0.999845	0.884084	-0.145794	80	77	17.1856	0.802515	0.709459	0.742996	0.376672	0.884045	15	18	0.531431	-0.151075	0.874359	0.776196	-0.28428	14	5	0.501298	0.0890565	0.969471	0.858997	0.177652	42	15	0.504308	-0.0349413	0.976187	0.944762	-0.0692856	25	20	0.493476	0.537721	0.511603	0.275863	1.08966	67	46	0.493723	0.0956873	0.952331	0.846326
CNAG_00612	2	18	0.748587	0.343098	0.999845	0.646717	0.458328	57	58	9.24235	0.820444	0.484783	0.855311	0.554602	0.590878	11	6	0.892878	-0.279149		0.754554	-0.31264	5	1	0.720311	1.0165	0.564105	0.158187	1.4112	24	40	0.995538	-2.06664		0.0379033	-2.0759	40	48	0.829528	-1.33072	0.28648	0.108672	-1.60419	56	84	0.755558	-0.695603	0.708017	0.357234
CNAG_00613	7	24	0.660461	-0.446761	0.999845	0.498763	-0.676437	72	45	11.6725	0.80842	-1.20762	0.46939	0.135228	-1.4938	5	4	0.903187	-1.34501	0.338876	0.136439	-1.48918	8	6	0.681052	-0.103747	0.97317	0.878923	-0.152334	17	25	0.650454	1.02621	0.379134	0.114639	1.57768	42	45	0.64728	0.684638	0.526351	0.290185	1.05772	65	85	0.638566	0.834142	0.537361	0.19146
CNAG_00614	7	19	0.784894	-0.175281	0.999845	0.823288	-0.223318	57	67	11.11	0.86459	-0.318949	0.920932	0.712201	-0.368902	15	2	1.87394	-3.18234		0.089468	-1.69821	8	2	1.28473	0.285759	0.958744	0.823981	0.222428	29	33	1.34781	-0.437493		0.745486	-0.324597	29	39	1.36196	-1.07152		0.43143	-0.786747	59	79	1.25657	0.0477289		0.969701
CNAG_00615	1	6	1.91973	0.284738	0.999845	0.882089	0.148322	15	24	1.59078	2.39031	-3.47325		0.146209	-1.45305	0	0	0.565251	-1.39211	0.108253	0.013785	-2.46282	1	1	0.446507	-0.0131487	0.99463	0.976507	-0.0294478	11	3	0.448841	-0.0339953	0.974154	0.939626	-0.0757402	7	10	0.433508	0.513603	0.469022	0.236112	1.18476	11	14	0.43218	0.244176	0.83346	0.572083
CNAG_00619	3	13	0.855137	-0.950186	0.999845	0.266503	-1.11115	26	15	6.34743	0.975927	-0.394502	0.912396	0.686041	-0.404234	5	3	1.22843	0.143686		0.906886	0.116967	12	3	1.13026	-0.0788735	0.988297	0.944366	-0.0697835	5	6	1.24978	-1.14418		0.359926	-0.915505	15	16	1.13461	-0.544605		0.631232	-0.479993	34	28	1.11994	-0.739419	0.800266	0.509106
CNAG_00622	15	23	0.770973	0.435948	0.999845	0.571767	0.565451	169	156	22.6371	0.824093	-0.370884	0.897725	0.652673	-0.450051	26	3	2.44285	-2.44909		0.316075	-1.00256	10	3	2.09917	-0.2206		0.916305	-0.105089	51	54	2.03647	0.883161		0.664526	0.433672	89	98	2.08345	-0.425514		0.83817	-0.204235	194	177	2.07157	-0.664594		0.748349
CNAG_00623	1	7	0.952725	1.0749	0.999845	0.259218	1.12824	38	42	8.27726	1.03435	1.21319	0.616881	0.240836	1.1729	11	2	0.832697	0.369417		0.657303	0.443639	7	4	0.869599	-1.17363	0.596045	0.177139	-1.34962	22	16	0.823276	-0.661148		0.421934	-0.80307	23	24	0.817905	-1.09283	0.397361	0.181504	-1.33614	48	34	0.719764	0.281294	0.89214	0.695934
CNAG_00624	1	13	0.890444	0.603535	0.999845	0.497904	0.677791	50	44	7.52415	1.00889	0.106176	0.978736	0.916184	0.105241	6	3	1.58528	-4.56165		0.00400842	-2.8775	4	4	0.730828	0.0103044	0.998079	0.98875	0.0140996	24	17	0.799939	-0.937759	0.549664	0.241082	-1.17229	27	24	0.692408	0.713786	0.540653	0.3026	1.03087	48	62	0.689356	0.442575	0.806589	0.520865
CNAG_00625	7	33	0.628497	0.418518	0.999845	0.505473	0.665904	139	120	22.9488	0.674388	0.357446	0.877482	0.596091	0.53003	31	6	1.2051	-0.142086	0.944772	0.906144	-0.117904	19	1	1.13154	1.74441	0.501827	0.123166	1.54162	68	36	1.18723	-0.917896	0.717772	0.439439	-0.77314	63	55	1.14763	-0.0546409	0.985733	0.962026	-0.0476118	137	117	1.14391	-0.235236	0.948713	0.83707
CNAG_00626	51	217	0.483096	0.150001	0.999845	0.756181	0.3105	760	692	109.076	0.504689	-0.798528	0.432336	0.1136	-1.58222	95	19	2.3474	-1.63425		0.486305	-0.696197	45	29	2.18809	-1.95527		0.371538	-0.893596	357	274	2.41421	-4.31455		0.0739141	-1.78714	354	468	2.05753	-1.25588		0.54161	-0.61038	966	948	2.05083	-1.57714		0.441878
CNAG_00627	15	158	0.869909	-3.71152	0.000527364	1.98506e-05	-4.26656	20	33	80.7077	0.850995	1.93005	0.183923	0.0233294	2.268	118	178	1.11473	-0.0723542		0.948248	-0.0649076	178	55	0.894582	1.23395	0.580534	0.167785	1.37935	7	3	0.939356	0.41947		0.6552	0.44655	55	10	0.948113	-0.204714	0.926753	0.829053	-0.215917	34	13	0.886509	0.662326	0.779736	0.454993
CNAG_00628	1	2	1.20409	0.765172	0.999845	0.525118	0.635476	11	16	4.66336	1.27791	1.99239	0.440638	0.118972	1.5591	7	2	2.86488	-0.505418		0.859965	-0.176418	0	2	2.89957	-3.08714		0.287017	-1.06469	12	1	2.89957	-3.00211		0.300498	-1.03537	13	6	2.65599	-0.525146		0.843263	-0.197721	10	25	2.56154	0.70407		0.783423
CNAG_00632	6	11	0.730985	0.109931	0.999845	0.880458	0.150388	61	44	10.5675	0.81704	0.150366	0.959094	0.853984	0.184037	11	4	6.71361	2.67343		0.690475	0.398211	12	3	6.76668	-0.636661		0.92504	-0.0940876	25	36	6.75493	0.797913		0.90597	0.118123	39	34	6.76668	-1.04608		0.877142	-0.154593	67	89	6.76668	-1.45049		0.830268
CNAG_00633	7	21	0.57088	0.202703	0.999845	0.722537	0.35507	78	90	16.5175	0.620906	0.659239	0.670251	0.288355	1.06174	23	9	0.974779	-1.69379	0.257937	0.0822789	-1.73761	14	9	0.697511	-0.199295	0.948821	0.77509	-0.285724	41	29	0.675102	0.543437	0.70221	0.420837	0.80497	71	54	0.660265	0.693602	0.530114	0.293493	1.05049	114	121	0.656719	0.495214	0.778466	0.450806
CNAG_00634	7	29	0.601871	-0.144418	0.999845	0.810371	-0.239948	97	65	16.3823	0.665661	-0.0131838	0.994371	0.984199	-0.0198055	19	6	1.26875	0.923432		0.466718	0.727829	13	0	1.12395	1.21761	0.713312	0.278659	1.08334	51	28	1.07795	2.3995		0.0260157	2.22598	46	63	1.07773	1.90785	0.227257	0.0766856	1.77025	99	105	1.07831	1.48252	0.511439	0.169176
CNAG_00635	5	26	0.579622	0.434299	0.999845	0.453689	0.74928	106	96	18.1701	0.644755	0.296807	0.897037	0.645271	0.460341	20	6	2.22374	3.02057		0.17436	1.35833	22	7	2.42871	0.786087		0.746192	0.323665	108	76	2.16671	2.29082		0.290385	1.05728	69	69	2.06564	2.92824		0.15631	1.41759	104	82	2.01936	3.5916		0.0753078
CNAG_00636	6	9	0.808668	-0.60419	0.999845	0.454978	-0.747142	28	31	8.10619	0.900749	-0.0692023	0.987334	0.938761	-0.0768275	9	3	1.47901	-0.525066		0.722581	-0.355012	7	2	1.11073	1.2128	0.711652	0.274877	1.0919	21	7	1.35262	-1.07755		0.425664	-0.796633	12	23	1.09215	1.29218		0.236747	1.18316	38	47	1.10504	0.536047	0.860658	0.62761
CNAG_00637	2	21	0.803516	0.0397768	0.999845	0.960518	0.0495035	60	44	8.42417	0.878809	0.169536	0.956733	0.847025	0.192916	12	4	2.45061	1.91428		0.434718	0.781143	4	9	2.42539	0.915087		0.705954	0.377295	26	15	2.69334	-1.99727		0.458354	-0.741559	35	39	2.47141	0.111102		0.964143	0.0449549	48	52	2.42789	0.0819665		0.973068
CNAG_00638	9	118	0.722042	0.49808	0.999845	0.490307	0.689821	414	299	37.3355	0.761542	-0.861747	0.636831	0.25781	-1.13158	33	8	2.04994	1.56472		0.445285	0.763299	33	15	1.81609	3.2957	0.365467	0.0695657	1.81473	186	149	1.88216	1.90368		0.311808	1.01144	174	183	1.884	1.3805		0.463711	0.73275	418	430	1.95911	0.167178		0.931996
CNAG_00639	4	8	0.997259	-0.455712	0.999845	0.647696	-0.456965	28	22	4.14855	1.44758	-2.30538	0.428849	0.111255	-1.59258	2	0	1.8335	0.569575		0.756068	0.310648	0	0	2.0767	-1.65323		0.425983	-0.796085	15	9	2.04952	-1.59466		0.43653	-0.778065	15	22	1.85345	-1.15104		0.534583	-0.621025	38	50	1.61176	0.469025		0.77105
CNAG_00640	224	851	0.310747	0.0667109	0.999845	0.830018	0.214679	2902	2751	462.678	0.317291	-0.481904	0.458636	0.128811	-1.51881	388	153	6.76629	-0.858213		0.89907	-0.126837	250	97	6.76629	-2.07595		0.75899	-0.306807	1392	1054	6.68895	0.485725		0.942112	0.072616	1593	1596	6.76629	-2.48537		0.713383	-0.367317	3581	3602	6.7574	-1.51897		0.822146
CNAG_00641	22	59	0.473232	0.0319682	0.999845	0.946142	0.0675529	251	199	40.9514	0.506468	0.0450019	0.984441	0.929198	0.0888543	50	15	1.63993	0.47873		0.770347	0.291921	26	12	1.30479	2.61119	0.280714	0.0453676	2.00123	100	78	1.3357	1.89914		0.155075	1.42183	144	158	1.31733	1.82879		0.16506	1.38825	287	257	1.30327	1.857	0.492058	0.154191
CNAG_00642	2	8	0.874816	1.98649	0.360674	0.0231618	2.27075	88	110	12.3493	0.949557	1.18074	0.581923	0.213698	1.24346	12	4	0.686238	-0.101161	0.932886	0.882806	-0.147413	6	1	0.571842	0.915734	0.470568	0.109294	1.60138	84	49	0.668288	-1.02261	0.396767	0.125967	-1.5302	38	33	0.608663	-0.566153	0.59294	0.35229	-0.930157	44	30	0.563748	0.491342	0.72997	0.383447
CNAG_00643	8	5	1.03733	-0.904623	0.999845	0.383171	-0.872068	27	26	8.21073	1.11576	-0.298827	0.942176	0.788835	-0.267824	5	5	1.12419	-0.883842		0.431749	-0.786202	5	2	0.800241	1.05457	0.603797	0.187567	1.31781	14	14	0.885454	-0.343494		0.698068	-0.38793	16	26	0.894463	-0.935431	0.532447	0.295653	-1.0458	32	44	0.785972	0.721832	0.709304	0.358412
CNAG_00644	1	5	1.04917	0.739293	0.999845	0.481033	0.704643	20	29	4.65201	1.09978	1.91493	0.371894	0.0816501	1.74119	10	5	1.56104	-2.62324		0.0928708	-1.68045	2	3	0.851724	0.213799	0.954041	0.801799	0.25102	20	19	0.837422	0.60921		0.46693	0.727483	17	23	0.821124	0.547912	0.717493	0.504599	0.667271	33	26	0.803445	0.819205	0.669975	0.307911
CNAG_00645	2	6	1.05274	-0.730669	0.999845	0.487642	-0.694064	8	17	4.30572	1.32213	-0.913137	0.819609	0.489781	-0.690658	2	1	1.1998	-2.04168	0.269377	0.0888158	-1.70168	2	3	0.675133	0.972867	0.550371	0.149584	1.441	8	6	0.817344	-1.20068	0.419064	0.141833	-1.469	12	9	0.688347	0.169389	0.913631	0.805619	0.246081	11	15	0.665156	0.552183	0.750563	0.406451
CNAG_00647	2	1	1.60944	0.676126	0.999845	0.674412	0.4201	17	18	4.61819	1.84537	-0.222708	0.974548	0.903941	-0.120685	0	2	0.79979	0.325674	0.824164	0.683862	0.407199	4	1	0.799268	-0.882776	0.708498	0.269385	-1.10448	4	6	0.810724	-0.945048	0.550574	0.243742	-1.16568	18	11	0.75274	-0.526025	0.706336	0.484669	-0.698813	15	13	0.734831	-0.500915	0.797103	0.495445
CNAG_00648	5	27	0.581376	0.559643	0.999845	0.335739	0.962618	116	110	15.0877	0.664326	-0.0717459	0.978037	0.913997	-0.107998	14	6	1.14593	2.51648		0.028091	2.19601	20	9	1.14779	1.26169	0.709808	0.271664	1.09924	41	49	1.20031	0.607344		0.612863	0.505991	58	61	1.28501	-0.638207		0.619431	-0.496656	145	141	1.18161	-0.0631229	0.994027	0.957396
CNAG_00649	34	150	0.385593	0.106163	0.999845	0.783067	0.275325	444	518	81.788	0.404441	0.158558	0.916361	0.695027	0.392043	106	36	1.74877	-1.40167		0.422832	-0.801518	71	22	1.17593	1.31824	0.696492	0.262276	1.12103	238	205	1.19808	0.937284		0.434026	0.782322	315	293	1.32256	-0.991661		0.453373	-0.749804	585	574	1.16795	0.727361	0.813907	0.533437
CNAG_00650	5	25	0.713033	-0.0175938	0.999845	0.980315	-0.0246745	66	76	9.79305	0.801527	-0.371767	0.897037	0.642774	-0.463824	7	7	1.14413	-0.726491		0.525445	-0.634975	8	7	0.936395	0.160757	0.969768	0.863692	0.171676	70	32	0.99869	-0.68541		0.492518	-0.68631	47	41	0.911063	0.384626		0.672899	0.422173	86	72	0.930851	-0.531196	0.832453	0.568233
CNAG_00651	3	9	1.03097	-0.0670687	0.999845	0.948131	-0.0650542	24	36	5.47122	1.14032	-0.0477147	0.992786	0.966624	-0.0418433	2	5	1.16677	-0.432621		0.710798	-0.370784	1	0	1.08755	-1.03068	0.759239	0.343279	-0.947707	14	10	1.10708	-1.1209		0.311308	-1.01248	18	10	1.02866	-0.781767		0.447265	-0.759983	27	15	1.06863	-1.661	0.430893	0.120107
CNAG_00652	1	9	1.03002	1.5221	0.999845	0.139477	1.47774	49	81	6.65818	1.17078	0.152511	0.971594	0.896357	0.130265	2	4	1.16405	1.98976		0.0873868	1.70935	4	0	1.11452	1.59926	0.55347	0.151306	1.43493	37	30	1.78214	-3.57847		0.0446481	-2.00796	19	9	1.34084	-1.07788		0.421464	-0.803884	41	28	1.1273	0.529579	0.864095	0.638515
CNAG_00653	1	1	1.58603	1.39022	0.999845	0.380735	0.876543	15	16	2.297	1.65723	2.25473		0.173658	1.36054	6	2	0.861694	-0.257656	0.871924	0.764931	-0.299011	11	3	0.826089	0.560625	0.852832	0.49736	0.678649	13	12	0.845369	-0.765096	0.662413	0.365442	-0.905044	7	3	0.833845	-0.582589	0.706336	0.484753	-0.698678	13	10	0.82483	-0.073078	0.985681	0.929402
CNAG_00654	2	7	1.02358	-0.766647	0.999845	0.453865	-0.748987	15	12	4.26342	1.08007	0.891411	0.766832	0.409187	0.825326	9	3	0.718475	0.453712	0.69897	0.527718	0.631493	10	7	1.23121	-4.98904	0.000710355	5.07477e-05	-4.05216	9	5	0.749147	-1.52431	0.214848	0.0418782	-2.03473	13	8	0.785025	-2.6468	0.00609309	0.000747279	-3.37162	29	27	0.748694	-2.41902	0.0125168	0.00123362
CNAG_00655	181	422	0.421661	-0.103343	0.999845	0.806391	-0.245085	1703	1541	314.388	0.431095	-0.806788	0.320297	0.0612777	-1.87149	223	67	6.76629	-0.858227		0.899068	-0.126839	144	45	6.76629	-2.07596		0.758988	-0.306809	671	541	6.76629	-1.99094		0.768572	-0.294243	1085	1096	6.76629	-2.48538		0.713381	-0.367319	2100	2178	6.76629	-2.88979		0.669316
CNAG_00656	208	542	0.309296	0.0904716	0.999845	0.769898	0.292508	2369	2085	406.842	0.315939	-0.159284	0.885381	0.614148	-0.504161	339	167	2.42742	-0.863468		0.722055	-0.355714	191	77	1.98253	3.49049		0.078302	1.76062	950	762	2.14454	0.849554		0.691997	0.396147	1253	1686	2.07436	1.03964		0.616241	0.501184	2805	3211	2.11735	0.181058		0.931855
CNAG_00657	0	0	4.82101	1.39309		0.77261	0.288963	4	2	0.258245	4.97194	1.65884		0.738651	0.33364	1	0	1.2649	3.65368	0.0574137	0.00387059	2.88852	0	0	1.27801	2.08193	0.460667	0.103305	1.62904	1	4	1.26896	2.40236	0.261269	0.0583341	1.89318	0	0	1.2421	2.9107	0.0894264	0.0191102	2.34337	0	1	1.22542	3.86759	0.0159397	0.00159869
CNAG_00658	9	11	1.03409	-0.893544	0.999845	0.38754	-0.864087	33	39	8.67658	1.18816	-1.59157	0.536437	0.180399	-1.33953	1	4	2.3281	-0.90705		0.696826	-0.389609	7	1	2.3944	-3.66188		0.126178	-1.52935	13	13	2.3944	-3.57685		0.135218	-1.49384	30	19	2.09162	-1.0951		0.600579	-0.523568	43	41	1.96468	0.304898		0.876672
CNAG_00659	1	5	1.16138	0.37679	0.999845	0.745611	0.324433	19	19	3.63389	1.23262	1.34251	0.658444	0.27609	1.08914	4	5	1.65661	-4.66504		0.00486238	-2.81601	5	0	0.912741	-0.825493	0.774725	0.365778	-0.904411	7	9	0.923611	-0.8963		0.331832	-0.97043	22	11	0.896997	-0.964945	0.518358	0.282039	-1.07575	15	17	0.852432	-0.209401	0.939733	0.805952
CNAG_00660	3	13	0.79433	-0.241568	0.999845	0.76104	-0.304115	38	29	8.53941	0.854352	0.695444	0.770093	0.415644	0.814001	8	8	0.87083	-1.0738	0.434616	0.217546	-1.23308	11	9	0.678876	-0.550702	0.804491	0.417252	-0.811198	89	95	0.633519	0.41719	0.773638	0.510199	0.658528	60	28	0.638571	-0.204954	0.882925	0.748243	-0.320957	39	20	0.614166	0.117188	0.952331	0.848676
CNAG_00661	9	6	1.18998	-0.431741	0.999845	0.716745	-0.362812	43	44	10.8352	1.21438	0.830779	0.821485	0.493901	0.684118	8	15	0.635969	-0.977584	0.324953	0.124255	-1.53716	5	2	0.507669	0.324482	0.870033	0.522719	0.63916	16	7	0.500563	0.798764	0.373596	0.110549	1.59573	26	21	0.489532	1.15848	0.0852905	0.0179566	2.36651	34	46	0.488806	0.830831	0.373638	0.0891844
CNAG_00662	4	29	0.649369	0.0279453	0.999845	0.965674	0.0430345	79	75	13.7204	0.725623	-0.112021	0.968726	0.877311	-0.154379	10	8	0.873533	-0.181094	0.898589	0.835766	-0.207312	12	4	0.752705	-0.168494	0.958507	0.822873	-0.223851	33	36	0.6981	1.00421	0.431506	0.150296	1.43849	46	71	0.690339	0.745761	0.516187	0.280017	1.08028	120	126	0.691169	0.313396	0.869758	0.65024
CNAG_00663	1	17	0.80978	0.91901	0.999845	0.256422	1.13489	71	76	10.4756	0.883641	0.621424	0.813792	0.481897	0.703254	13	4	1.95342	0.407231		0.834861	0.208471	4	3	1.68045	1.96752		0.241666	1.17083	23	27	1.69869	1.62517		0.338707	0.956723	33	29	1.74089	0.419148		0.809736	0.240766	84	90	1.92184	-1.45794		0.448082
CNAG_00664	0	1	3.03636	0.145714		0.961724	0.0479897	3	3	0.598092	3.3097	-0.906271		0.784221	-0.273823	0	0	0.885268	1.82959	0.176911	0.0387615	2.06671	3	0	0.813412	2.37975	0.0359677	0.00343746	2.92564	0	2	0.909607	0.3722	0.866591	0.682402	0.409188	0	1	0.826861	1.45737	0.229505	0.0779794	1.76253	3	5	0.819509	1.31371	0.411063	0.108924
CNAG_00665	83	73	0.931609	-0.791689	0.999845	0.395431	-0.849809	306	390	76.9585	0.943665	-0.831109	0.743637	0.378467	-0.880725	42	40	0.944131	0.914886		0.332533	0.969025	39	12	0.872649	0.650189	0.829057	0.456227	0.745075	167	119	0.921225	0.0352629		0.969466	0.0382783	150	121	0.893122	-0.0895456	0.966706	0.920137	-0.100261	249	281	0.834814	0.718273	0.734019	0.389569
CNAG_00666	22	94	0.554058	-0.384348	0.999845	0.487873	-0.693695	236	199	37.5276	0.589111	-0.585887	0.69919	0.319966	-0.994527	48	9	0.806027	-0.576981	0.654741	0.474094	-0.715833	38	4	0.796107	-0.214254	0.950745	0.787832	-0.269127	118	111	0.795248	0.181671	0.918001	0.8193	0.228445	159	161	0.825324	-3.45146	0.000312039	2.89019e-05	-4.18195	317	268	0.793574	0.0524142	0.991786	0.947339
CNAG_00667	1	7	0.990429	0.711702	0.999845	0.4724	0.71858	31	31	5.08977	1.09863	0.744342	0.82476	0.498077	0.677519	7	2	1.37918	2.48419		0.0716701	1.80121	4	2	1.33357	2.11509	0.47883	0.112733	1.58603	16	13	1.43664	0.681783		0.635095	0.474569	9	14	1.35027	1.34099		0.32065	0.993122	43	32	1.31598	1.82614	0.506185	0.165238
CNAG_00668	9	51	0.576975	0.148548	0.999845	0.796823	0.25746	141	169	26.0771	0.608601	0.453521	0.795644	0.456159	0.745187	28	21	1.49692	-0.855253		0.567769	-0.57134	31	6	1.19232	-0.114324	0.982864	0.923613	-0.0958835	74	45	1.17593	0.183404		0.87606	0.155966	109	95	1.19	-0.494101		0.677987	-0.415212	150	159	1.11136	0.564164	0.854311	0.61171
CNAG_00669	10	17	0.762555	-1.08014	0.999845	0.156636	-1.41648	42	35	8.56256	0.872803	-1.03605	0.610663	0.235211	-1.18704	8	3	1.83252	0.975798		0.594386	0.532491	9	2	1.74801	0.453308	0.952882	0.795382	0.259328	18	22	1.74591	0.566964		0.745379	0.324738	29	34	1.79912	-0.409637		0.81989	-0.227687	58	75	1.64812	1.34627		0.414015
CNAG_00670	2	1	1.6303	-1.43766	0.999845	0.377865	-0.881837	4	4	2.14501	1.72687	0.39106		0.820847	0.226456	3	1	1.62614	0.517563		0.750275	0.318277	3	0	1.62749	-0.705612		0.664609	-0.433559	2	3	1.60983	-0.503417		0.754498	-0.312714	2	9	1.53831	-0.400907		0.794389	-0.260616	13	4	1.54808	-0.901209		0.560469
CNAG_00671	8	35	0.574916	0.41565	0.999845	0.469695	0.722976	125	156	15.4488	0.660264	-0.533655	0.771814	0.418949	-0.808246	14	6	0.626419	-1.33416	0.163971	0.033186	-2.12983	9	3	0.51442	0.998999	0.305505	0.0521381	1.94199	80	66	0.569835	-1.49803	0.0822736	0.00856638	-2.62889	27	47	0.520008	0.0347664	0.979588	0.946695	0.0668575	92	96	0.511386	0.629502	0.572765	0.218334
CNAG_00672	183	475	0.405472	-0.411907	0.999845	0.30969	-1.01587	1541	1230	262.622	0.41477	-0.835116	0.267401	0.0440679	-2.01344	224	73	2.76155	-1.09021		0.693005	-0.394781	127	52	2.60504	-1.22721		0.637575	-0.471092	674	604	2.79766	-3.5878		0.199693	-1.28243	877	1201	2.60504	-1.62965		0.531592	-0.625578	2078	2295	2.51976	-1.24512		0.621206
CNAG_00673	10	27	0.519416	-0.0549288	0.999845	0.91578	-0.105751	104	86	21.3522	0.590015	-0.10084	0.963785	0.864294	-0.17091	17	8	1.23171	1.16653		0.343597	0.947082	13	2	1.2273	-0.00391512	0.999286	0.997455	-0.00319004	47	34	1.30908	-0.621922		0.634728	-0.475083	44	58	1.7557	-3.06831		0.0805284	-1.74763	124	119	1.18493	-0.291098	0.939733	0.80594
CNAG_00674	7	17	0.721113	-0.498827	0.999845	0.489097	-0.691746	44	49	11.7295	0.780091	0.1941	0.945682	0.803502	0.248817	10	9	2.15358	-1.8616		0.387357	-0.864421	12	3	1.72573	0.668875		0.69832	0.387589	18	25	1.92383	-0.696663		0.71726	-0.362123	20	18	1.71283	0.425786		0.803681	0.248586	33	32	1.63347	1.78536		0.2744
CNAG_00675	3	20	0.731428	0.270931	0.999845	0.711074	0.370414	66	63	13.8535	0.755316	1.6252	0.21836	0.0314223	2.15168	24	18	1.37426	1.01692		0.459315	0.739975	13	5	1.45273	-0.98949	0.851741	0.495791	-0.681127	38	20	1.43752	-0.777683		0.588515	-0.540989	32	26	1.39667	-0.881427		0.527982	-0.63109	70	89	1.31661	-0.0258819	0.99709	0.984316
CNAG_00676	2	15	1.02226	-1.08291	0.999845	0.289453	-1.05932	12	24	4.97831	1.10134	-0.0499542	0.992273	0.963822	-0.0453579	4	5	1.68084	-2.04425		0.223906	-1.21621	6	4	1.14962	-0.61603	0.905623	0.592058	-0.535856	7	10	1.0566	0.809663		0.443504	0.766289	10	9	1.0161	1.69794		0.0947149	1.67103	22	17	1.01928	1.12301	0.62718	0.270562
CNAG_00677	4	4	1.06022	-0.833692	0.999845	0.431668	-0.786341	14	15	6.47167	1.10881	0.875382	0.779575	0.429833	0.789478	9	4	1.71296	3.68521		0.0314473	2.15137	3	4	1.7332	2.09741	0.656887	0.226227	1.21014	8	19	1.76515	1.73559		0.325483	0.983253	19	10	1.72765	1.78014		0.30283	1.03038	18	29	1.66934	3.00781	0.333973	0.0715781
CNAG_00678	6	32	0.617039	0.888547	0.999845	0.149863	1.44002	153	181	18.3321	0.700104	-0.339137	0.890397	0.628095	-0.48441	9	9	0.90701	0.765919	0.599315	0.398421	0.844444	19	16	0.752868	2.34654	0.0203823	0.00182823	3.1168	59	71	0.854976	0.170671	0.929027	0.841777	0.199621	83	71	0.809519	0.338601	0.838342	0.675747	0.418274	163	151	0.763801	1.07255	0.499432	0.160251
CNAG_00679	2	4	0.95773	1.18788	0.999845	0.214861	1.24031	36	38	5.64076	1.02187	1.72387	0.394905	0.091609	1.68697	11	4	1.09468	-1.73788	0.309614	0.112385	-1.58757	13	3	0.742756	1.378	0.345446	0.0635611	1.85525	17	14	1.53766	-4.45614	0.0521149	0.00375548	-2.898	43	24	1.25967	-4.00545	0.0111512	0.00147402	-3.17975	20	12	0.876399	-2.30452	0.0711868	0.00855034
CNAG_00680	5	7	0.866554	-0.850852	0.999845	0.326159	-0.981881	20	20	8.11119	0.937949	0.344606	0.921035	0.713318	0.367404	10	3	3.15258	1.94271		0.537742	0.616231	4	2	2.88578	3.74529		0.194341	1.29784	22	6	3.13492	1.03415		0.74149	0.329881	21	24	3.14438	0.509023		0.871398	0.161884	46	29	2.9761	1.38051		0.642743
CNAG_00681	3	21	0.726283	-0.33283	0.999845	0.646762	-0.458265	44	44	10.1914	0.767338	0.835531	0.658444	0.276211	1.08887	21	7	1.19071	1.56607		0.188429	1.31524	5	2	1.07636	2.34943	0.20703	0.0290548	2.18274	52	16	1.21708	0.191078		0.875247	0.156997	27	33	1.10337	1.19938	0.512479	0.277031	1.08701	42	90	1.06462	2.03127	0.288392	0.056394
CNAG_00682	12	31	0.486296	0.187101	0.999845	0.700424	0.384748	128	135	29.5815	0.51331	1.06192	0.247992	0.0385668	2.06878	43	22	0.523898	-0.927726	0.250176	0.0765912	-1.77082	32	14	0.459249	0.461207	0.750233	0.315251	1.00426	662	451	0.47903	-0.753831	0.379599	0.115566	-1.57366	95	85	0.456271	0.42003	0.597358	0.357275	0.920571	168	127	0.454078	0.343863	0.77784	0.448884
CNAG_00683	8	45	0.664189	-0.828096	0.999845	0.212479	-1.24678	69	70	20.6011	0.683262	0.767835	0.640666	0.261107	1.12378	23	27	0.863971	-1.24877	0.351727	0.148349	-1.44539	21	10	0.658952	0.879822	0.598485	0.181816	1.33518	46	35	0.659275	0.966319	0.419494	0.142722	1.46573	57	45	0.644566	1.60843	0.0654354	0.0125829	2.49536	92	104	0.647873	0.85782	0.5301	0.185484
CNAG_00684	10	50	0.663185	-0.12655	0.999845	0.848665	-0.190822	137	124	23.6549	0.714205	-0.403505	0.865676	0.572093	-0.564971	29	4	0.692039	0.277844	0.825056	0.688062	0.401487	11	8	0.677083	-0.639677	0.75937	0.344785	-0.944754	71	100	0.6777	-0.561142	0.691348	0.407666	-0.828009	82	100	0.680092	-1.11183	0.274946	0.102085	-1.63483	217	197	0.649644	-0.661538	0.670436	0.308532
CNAG_00685	6	36	0.560504	0.766597	0.999845	0.171408	1.36769	161	174	23.5604	0.619507	0.15382	0.945682	0.803907	0.248294	18	11	0.512158	-0.737159	0.353264	0.15006	-1.43932	13	4	0.469408	-0.262194	0.899054	0.57646	-0.558563	73	58	0.465245	0.181502	0.871782	0.696447	0.390121	66	83	0.455404	1.04437	0.0973624	0.0218317	2.29328	124	144	0.45987	-0.137506	0.927311	0.764931
CNAG_00686	50	559	0.653348	0.560908	0.999845	0.390609	0.858513	1856	1701	189.304	0.663389	-0.938513	0.504486	0.157149	-1.41473	156	35	1.13759	0.776852		0.494675	0.682892	109	59	1.07052	0.160149	0.974184	0.881081	0.149599	837	738	0.977606	1.71614		0.079182	1.75545	833	1058	0.955488	1.94665	0.150489	0.0416163	2.03734	2322	2267	0.953562	1.62468	0.372109	0.0884186
CNAG_00687	8	34	0.8746	-1.02816	0.999845	0.239762	-1.17558	55	46	23.4445	0.881038	1.39707	0.431436	0.112805	1.58571	20	39	0.705307	-0.0460851	0.966815	0.947903	-0.0653404	8	1	0.69119	0.409095	0.887794	0.553937	0.591872	30	33	0.693859	0.0120647	0.994646	0.986127	0.0173878	24	27	0.691161	0.0216695	0.990107	0.974989	0.0313523	64	70	0.689074	0.195919	0.930363	0.776163
CNAG_00688	6	52	0.612277	0.171083	0.999845	0.779921	0.279422	149	137	21.0113	0.668695	-0.270829	0.911967	0.685469	-0.405011	23	7	2.02415	-3.44913		0.0883832	-1.70399	12	2	1.76155	-2.28824		0.193946	-1.29899	44	37	1.60446	-1.23366		0.441957	-0.768893	83	65	1.47962	-0.0331008		0.982152	-0.0223711	167	144	1.50259	-0.921613		0.539646
CNAG_00689	6	16	0.689931	-0.35327	0.999845	0.608626	-0.512036	44	48	11.1671	0.787083	-0.253676	0.931679	0.747226	-0.322299	11	3	0.841461	-3.49937	0.00304635	3.20083e-05	-4.15869	9	0	0.724955	0.565023	0.81693	0.43575	0.77939	28	23	0.766076	-3.11508	0.00192555	4.7769e-05	-4.06628	33	24	0.736341	-1.98752	0.0408035	0.00695094	-2.69919	62	62	0.728666	-1.32077	0.329868	0.0698956
CNAG_00690	14	31	0.57619	-0.456959	0.999845	0.427737	-0.79307	100	85	19.5456	0.631893	-0.258012	0.910889	0.683042	-0.408315	20	9	1.18128	0.509775		0.666073	0.431544	8	2	0.978791	1.75189	0.376292	0.0734782	1.78985	50	40	1.02084	0.949298		0.352413	0.92992	63	61	0.956601	2.16863	0.101313	0.0233891	2.26702	111	131	0.959561	1.62409	0.376641	0.090543
CNAG_00691	3	14	0.777795	0.562695	0.999845	0.469404	0.723449	70	53	7.76978	1.00728	-1.14694	0.633357	0.254847	-1.13865	3	2	1.5498	-5.10869	0.0277721	0.000979478	-3.29636	4	7	0.638153	-0.298117	0.920119	0.640388	-0.467156	29	12	0.617831	0.299186	0.850966	0.628207	0.484252	21	13	0.598066	0.525544	0.619875	0.379542	0.87874	50	53	0.588013	0.68088	0.603046	0.246892
CNAG_00692	3	6	0.998956	0.912413	0.999845	0.36105	0.913367	45	50	6.81075	1.05254	1.34299	0.565535	0.201971	1.27596	6	9	0.865832	0.66838	0.627043	0.440143	0.771951	8	4	0.888004	-0.809005	0.771981	0.362276	-0.911037	30	24	0.865408	-0.458228	0.831387	0.596463	-0.529494	27	33	0.799455	0.25314	0.884393	0.751516	0.316641	45	51	0.779545	0.517021	0.799581	0.50718
CNAG_00693	5	15	0.746652	0.0620217	0.999845	0.933799	0.0830664	41	68	13.1191	0.811962	0.395917	0.889928	0.625829	0.487605	8	9	0.911382	1.37768		0.130627	1.51163	9	4	0.861158	1.02508	0.664603	0.23391	1.19035	29	17	0.950005	-0.204001		0.829973	-0.214737	35	28	0.892834	0.022506	0.990959	0.97989	0.0252074	41	47	0.863109	0.169239	0.952136	0.844547
CNAG_00694	19	83	0.388712	0.181147	0.999845	0.641203	0.466018	279	288	44.8107	0.424538	0.0253406	0.989641	0.952403	0.05969	49	21	5.2379	-0.858377		0.869827	-0.163878	26	9	5.12916	0.498037		0.922648	0.0970991	141	112	5.2379	-1.9911		0.703847	-0.380132	177	200	5.21007	-0.843503		0.871386	-0.161899	396	337	5.09658	0.317184		0.950376
CNAG_00695	1	10	1.03266	-0.161758	0.999845	0.875527	-0.156642	19	25	4.40976	1.20417	-0.383101	0.933064	0.750375	-0.318145	3	2	2.74805	0.581084		0.832534	0.211453	2	3	2.44761	2.80973		0.250989	1.14795	26	21	2.45747	2.7816		0.257679	1.13189	15	24	2.44063	2.50755		0.304224	1.02742	27	31	2.40036	2.84428		0.236042
CNAG_00696	2	20	0.735989	0.928232	0.999845	0.207236	1.2612	88	99	12.4824	0.797237	0.694302	0.747477	0.383817	0.870885	13	8	1.24144	-0.579923		0.640403	-0.467135	8	1	1.05804	0.114283	0.982864	0.913984	0.108014	46	30	1.10204	-0.487885		0.657974	-0.442712	70	30	1.0949	-0.890473		0.416051	-0.813291	69	80	1.00389	1.15915	0.605116	0.248231
CNAG_00697	18	55	0.46417	-0.296603	0.999845	0.522824	-0.638998	149	163	27.1096	0.515938	-0.407486	0.779575	0.429647	-0.789796	23	15	0.934016	0.711014		0.446511	0.761244	28	6	0.811726	1.18152	0.544767	0.145512	1.45557	79	57	0.93035	-0.384382	0.866591	0.679491	-0.413158	83	97	0.837535	0.249873	0.891191	0.765441	0.298343	189	187	0.796953	0.770013	0.688924	0.333946
CNAG_00698	12	14	0.772868	-0.513242	0.999845	0.506642	-0.664075	66	55	13.4186	0.862636	-0.76877	0.739781	0.372829	-0.891187	10	4	1.41761	-1.52811		0.281057	-1.07795	9	2	1.01528	0.419634	0.93471	0.679375	0.413317	25	29	1.28457	-2.08137		0.105172	-1.62028	51	31	1.07653	-1.00422		0.350906	-0.932833	75	69	1.06151	-1.21233	0.609084	0.25342
CNAG_00699	2	10	0.766527	0.76905	0.999845	0.315721	1.00329	46	54	12.5222	0.805222	1.80784	0.190048	0.0247586	2.24515	14	12	1.16862	2.03379		0.0817999	1.74034	4	10	1.12653	1.51607	0.596265	0.17837	1.34579	29	21	1.17751	0.786105		0.50439	0.667598	17	12	1.11569	1.35504	0.453632	0.224546	1.21453	30	39	1.09896	1.42886	0.539706	0.193536
CNAG_00700	27	155	0.425015	0.0945138	0.999845	0.82402	0.222378	439	455	62.3429	0.457046	-0.601704	0.546985	0.188004	-1.31651	58	20	1.21573	-0.473473		0.696939	-0.389455	42	12	0.95375	0.680983	0.840144	0.475224	0.714005	188	175	0.999247	0.0513496		0.959016	0.0513883	259	289	0.960726	0.141875	0.944826	0.8826	0.147674	621	646	0.921737	0.688838	0.779736	0.454867
CNAG_00701	20	24	0.665108	-0.539709	0.999845	0.417101	-0.811462	114	89	25.3944	0.706076	-0.209941	0.937295	0.766211	-0.297335	22	12	1.54471	-0.00110324		0.99943	-0.000714203	23	3	1.37085	0.320102		0.815368	0.233506	62	53	1.65359	-1.6734		0.311549	-1.01198	63	63	1.53658	-1.57629		0.304966	-1.02584	121	156	1.36548	-0.407381		0.765443
CNAG_00702	12	10	0.886089	-0.667536	0.999845	0.451239	-0.753352	52	49	9.98941	1.04286	-1.65952	0.429502	0.111539	-1.59131	5	2	1.62002	4.23798		0.00889634	2.61601	1	4	1.69955	1.63737	0.755517	0.335338	0.963418	28	39	1.72149	1.47564		0.391343	0.857184	19	24	1.61395	2.79251		0.083589	1.73023	50	68	1.59777	3.02844	0.293138	0.0580366
CNAG_00703	87	290	0.378546	-0.175392	0.999845	0.643128	-0.46333	928	808	162.934	0.395447	-0.709287	0.350277	0.0728715	-1.79363	137	38	1.50691	-3.59111	0.122337	0.0171676	-2.3831	83	29	0.687857	1.70274	0.1148	0.0133076	2.47543	360	333	0.977867	-2.69696	0.0669787	0.00581563	-2.758	546	637	0.862984	-2.39827	0.0338874	0.00545191	-2.77904	1296	1193	0.740029	-1.19507	0.407504	0.106334
CNAG_00704	5	25	0.788159	0.740091	0.999845	0.347725	0.939012	112	127	20.4039	0.817172	1.1109	0.529469	0.174008	1.35944	13	22	0.836285	0.00312136	0.997692	0.997022	0.00373241	14	10	0.836058	-1.21114	0.547275	0.14744	-1.44863	65	42	0.779059	-0.182872	0.916454	0.814415	-0.234734	47	47	0.796	-1.0211	0.421665	0.199564	-1.28279	71	53	0.742738	0.0558033	0.989954	0.94011
CNAG_00705	22	39	0.572758	-0.142755	0.999845	0.803174	-0.249242	146	187	27.9446	0.641111	-0.983019	0.450822	0.125201	-1.5333	19	7	3.46232	1.61363		0.641176	0.466055	23	22	3.60947	-2.07661		0.565073	-0.575323	102	81	3.56417	-0.36996		0.917328	-0.1038	106	95	3.60947	-2.48604		0.490978	-0.688755	175	219	3.38634	0.569008		0.866559
CNAG_00706	6	13	0.752397	0.119525	0.999845	0.87378	0.158859	53	62	11.898	0.849356	-0.157153	0.959094	0.853209	-0.185026	9	4	1.13906	-1.01901		0.370998	-0.894606	6	3	0.95676	-0.309262	0.94877	0.746515	-0.323239	40	11	0.952565	-0.125686	0.958736	0.895028	-0.131945	25	35	0.992243	-1.30203	0.408255	0.189448	-1.31221	78	47	0.916477	0.026731	0.99709	0.976731
CNAG_00707	5	23	0.89073	-0.37218	0.999845	0.676066	-0.417837	65	40	6.37783	1.05576	-1.49713	0.503432	0.156175	-1.41805	6	1	3.36963	4.06148		0.228081	1.20532	4	3	3.43468	1.92245		0.575672	0.559718	28	26	3.56991	0.812554		0.819948	0.227612	23	41	3.5938	-1.0461		0.770987	-0.291085	75	62	3.55884	0.123838		0.972241
CNAG_00708	6	21	0.637732	-0.611283	0.999845	0.337797	-0.958527	40	50	13.1084	0.684982	0.498932	0.805789	0.466376	0.728387	14	11	2.2038	-0.48209		0.826842	-0.218754	10	4	1.8116	1.21555		0.502231	0.670984	34	17	1.94618	-0.162053		0.933639	-0.083267	32	45	1.77621	1.65816		0.350543	0.933536	53	60	1.78484	0.999107		0.575632
CNAG_00709	4	12	0.831692	-0.835562	0.999845	0.315064	-1.00465	25	22	5.25638	0.982964	-0.719642	0.80299	0.464099	-0.732115	5	2	1.02372	-0.765441		0.454637	-0.747708	2	1	0.837319	-0.372986	0.927837	0.655993	-0.445453	16	8	0.806859	0.208751		0.795851	0.258721	24	19	0.892688	-1.42259	0.290547	0.111026	-1.5936	32	46	0.782811	-0.153429	0.952136	0.844612
CNAG_00710	8	22	0.631686	0.506982	0.999845	0.422215	0.802585	126	102	17.5247	0.695431	0.14835	0.952849	0.831076	0.213322	16	8	0.988901	-0.806088	0.609928	0.414995	-0.815136	10	11	0.702297	1.48157	0.235062	0.0348918	2.10961	40	52	0.77779	-0.176319	0.918213	0.820663	-0.226692	40	46	0.779859	-0.697725	0.612149	0.370958	-0.894681	106	99	0.699972	0.775845	0.624027	0.267692
CNAG_00711	7	24	1.07914	-0.776718	0.999845	0.471677	-0.719753	41	52	10.6216	1.14063	-0.578728	0.884201	0.611891	-0.507375	4	8	1.17702	0.811815		0.490369	0.689722	13	5	1.06155	0.896535	0.792353	0.398359	0.844555	32	40	1.12479	0.150748		0.893384	0.134023	17	16	1.07318	0.300469		0.779492	0.279981	31	32	1.01114	1.34675	0.525196	0.18289
CNAG_00712	4	11	0.86924	-0.276819	0.999845	0.750136	-0.318461	34	32	4.99352	1.05356	-0.929987	0.743218	0.377393	-0.88271	5	1	5.4877	0.581078		0.915672	0.105887	3	3	5.34865	2.66969		0.617685	0.499134	16	9	5.47299	0.80073		0.88368	0.146306	27	21	5.46093	0.601158		0.912343	0.110083	48	42	5.46219	0.185564		0.972899
CNAG_00713	11	31	0.574727	-0.086111	0.999845	0.880899	-0.149829	108	103	17.621	0.64227	-0.315765	0.88865	0.622975	-0.491639	21	5	0.765379	-1.08905	0.360114	0.154768	-1.42289	7	7	0.652343	0.930135	0.556313	0.153916	1.42584	52	54	0.696966	-1.02976	0.41648	0.139546	-1.47749	64	79	1.06096	-4.73361	0.000100716	8.13322e-06	-4.46165	148	127	0.657155	-0.284669	0.877786	0.664881
CNAG_00714	5	13	0.791609	-0.532875	0.999845	0.500849	-0.673155	34	33	7.80827	1.00063	-1.29147	0.558304	0.196824	-1.29065	2	3	0.783224	-2.20796	0.0632442	0.00481635	-2.81907	7	2	0.606357	-0.32437	0.905623	0.592685	-0.534949	18	9	0.61423	-0.59253	0.636701	0.33471	-0.96467	19	22	0.589963	0.588792	0.556554	0.318272	0.998015	67	43	0.587169	0.593055	0.673687	0.312483
CNAG_00715	55	39	0.95017	-1.85817	0.672982	0.0505101	-1.95562	137	75	43.189	0.992287	-2.03501	0.253917	0.0402837	-2.05083	12	11	4.90467	2.69276		0.582991	0.54902	17	1	4.82273	2.74328		0.569475	0.568824	40	68	4.97937	-0.551641		0.911787	-0.110785	42	121	4.96631	0.324979		0.947826	0.0654368	228	271	4.95174	0.174759		0.971847
CNAG_00716	61	88	0.591904	-0.422942	0.999845	0.47489	-0.714546	381	354	89.4196	0.619728	-1.07422	0.375139	0.0830284	-1.73338	55	14	0.74053	0.236229		0.749727	0.319	42	19	0.702335	-0.385539	0.902146	0.583048	-0.548939	147	131	0.709066	-0.420063	0.807928	0.553571	-0.592417	210	233	0.706869	-0.8764	0.441058	0.215037	-1.23983	461	433	0.955578	-3.48898	0.00293321	0.000261047
CNAG_00717	1	9	1.1717	1.28371	0.999845	0.273256	1.0956	60	49	4.28757	1.76563	-2.57854	0.487886	0.144177	-1.46041	1	0	1.8669	1.23755		0.507401	0.662889	8	1	1.80488	0.624091		0.729508	0.345781	24	13	1.80999	0.658953		0.715809	0.364065	19	31	1.89542	-0.61202		0.746775	-0.322894	71	56	1.77157	0.281584		0.873711
CNAG_00718	7	14	0.859343	-0.55846	0.999845	0.515777	-0.649869	58	25	8.77299	1.02555	-1.33462	0.553886	0.193132	-1.30137	6	1	0.819722	-0.549186	0.677839	0.502879	-0.669967	5	3	0.669818	0.887592	0.600939	0.18513	1.32512	25	18	0.825832	-1.73289	0.196957	0.0358734	-2.09836	27	37	0.693871	-0.339053	0.800982	0.625097	-0.48864	46	41	0.667065	0.211775	0.922578	0.750885
CNAG_00719	13	23	0.668384	-0.138392	0.999845	0.835967	-0.207055	83	112	18.5481	0.721768	-0.120838	0.965786	0.86704	-0.167419	21	7	1.68671	-2.78535		0.0986676	-1.65135	11	7	1.19054	-1.65358	0.575434	0.164854	-1.38893	59	37	1.14522	-1.14543		0.317223	-1.00018	68	72	1.30621	-2.82414		0.030611	-2.16209	120	98	1.24785	-2.88501		0.0207783
CNAG_00720	9	54	0.762719	1.90534	0.217633	0.0124866	2.49809	465	607	39.0477	0.818783	-0.618715	0.79333	0.449858	-0.755652	21	6	1.36344	-1.90477		0.162404	-1.39703	19	2	0.977968	-0.180536	0.968357	0.85354	-0.184603	214	219	1.01965	-0.77224		0.448835	-0.757358	55	30	1.02063	-1.28219		0.209014	-1.25628	218	114	0.967649	-0.760847	0.768313	0.431701
CNAG_00721	16	100	0.502632	0.710904	0.999845	0.157255	1.41436	353	507	95.035	0.521591	0.574206	0.651495	0.270952	1.10087	86	27	0.729079	0.327934	0.79911	0.65286	0.449792	41	10	0.69175	0.13039	0.967514	0.85049	0.188493	251	175	0.706175	-0.25323	0.885236	0.719899	-0.358594	286	98	0.71552	-1.00208	0.368827	0.161367	-1.40049	207	205	0.683665	-0.31941	0.86487	0.640355
CNAG_00722	11	28	0.701134	-0.223066	0.999845	0.750371	-0.31815	101	83	22.6361	0.740008	0.230677	0.934058	0.755251	0.311722	11	18	2.0965	2.87674		0.170011	1.37217	27	6	1.84731	4.53613		0.0140675	2.45554	47	30	2.05256	2.00171		0.32945	0.975222	76	77	1.87717	3.35999		0.0734654	1.78993	133	131	1.87355	3.02993		0.105833
CNAG_00723	1	1	1.46663	0.18581	0.999845	0.899184	0.126692	9	4	3.27788	1.48102	2.86393		0.0531431	1.93376	7	4	5.10116	0.581079		0.909308	0.113911	7	1	4.96551	2.35201		0.635736	0.473668	6	7	5.06635	1.14073		0.821857	0.225158	6	4	5.01815	1.161		0.817035	0.23136	7	7	5.10116	-1.4505		0.776144
CNAG_00726	0	0	4.55016	0.408902		0.928394	0.0898653	1	2	0.431761	4.70066	0.349168		0.940787	0.0742806	0	0	1.67139	1.00352		0.548233	0.60041	0	0	1.49965	1.56793		0.295778	1.04553	4	2	1.77232	-0.670223		0.70531	-0.378162	1	1	1.59472	-0.0467829		0.976596	-0.0293362	2	1	1.48947	0.969113		0.515278
CNAG_00727	2	70	0.99024	0.592058	0.999845	0.549911	0.597893	206	189	29.0598	1.01604	0.20783	0.95502	0.837925	0.204549	38	8	0.737289	1.16694	0.309963	0.113479	1.58275	21	14	0.682615	0.990787	0.546366	0.146652	1.45146	107	73	0.707162	0.528131	0.726918	0.455165	0.746832	116	92	0.684811	0.52472	0.67455	0.443541	0.766227	178	203	0.65686	1.07465	0.39853	0.101832
CNAG_00728	2	5	0.975633	0.645362	0.999845	0.508305	0.66148	24	34	5.35879	1.05314	1.20935	0.628313	0.250833	1.14833	6	5	0.901408	0.535773		0.552262	0.594373	4	1	0.786317	1.22313	0.495361	0.119824	1.55551	20	8	1.03283	-1.57124	0.399265	0.128186	-1.52129	8	7	0.917199	-1.23296	0.394136	0.178861	-1.34427	17	14	0.838777	-0.722233	0.734019	0.389208
CNAG_00729	1	0	1.90056	1.04503	0.999845	0.58242	0.549853	3	11	2.44914	2.1226	1.20031		0.571738	0.565493	1	1	0.560665	0.631286	0.481309	0.260183	1.12596	0	1	0.688712	-2.28201	0.0107897	0.000921552	-3.31344	5	0	0.570501	-0.712395	0.51475	0.211768	-1.24872	4	2	0.548168	-0.686705	0.435043	0.210305	-1.25273	1	1	0.520109	-0.0382033	0.989954	0.941446
CNAG_00730	58	260	0.418161	0.297293	0.999845	0.477113	0.710954	1069	819	135.227	0.430027	0.00881895	0.994371	0.983638	0.0205079	172	52	0.867639	-1.80222	0.173873	0.0377879	-2.07715	114	58	0.675143	0.0724243	0.982864	0.914573	0.107273	427	322	0.798297	-2.31863	0.0519001	0.00367868	-2.90448	564	537	0.701305	-1.25723	0.220189	0.0730206	-1.7927	1063	1095	0.687071	-1.22611	0.340489	0.0743359
CNAG_00732	6	43	0.712454	0.699201	0.999845	0.326396	0.981399	169	186	19.0489	0.769822	-0.240474	0.933917	0.754755	-0.312376	24	4	1.87106	-1.69743		0.364302	-0.907199	18	16	1.37529	0.521194		0.704709	0.378971	83	55	1.54025	-1.23006		0.424518	-0.798607	86	79	1.39476	-0.245322		0.860381	-0.175889	164	192	1.45895	-1.46968		0.313766
CNAG_00733	7	17	0.714865	-0.232475	0.999845	0.745029	-0.325201	59	53	13.2645	0.769592	0.350341	0.897037	0.648944	0.45523	16	7	1.28834	-0.232279		0.856922	-0.180293	7	5	1.25232	-1.16598	0.76442	0.351827	-0.931051	31	29	1.47654	-2.37598		0.107582	-1.60916	43	26	1.24428	-1.50583		0.226203	-1.2102	39	62	1.47653	-3.26782		0.0268859
CNAG_00734	3	27	0.644685	0.462425	0.999845	0.473196	0.717289	92	94	18.3974	0.693838	0.687853	0.700591	0.321503	0.991374	16	12	0.620734	-1.33404	0.161857	0.0316237	-2.14914	12	5	0.534449	0.186714	0.947054	0.72682	0.349359	37	42	0.534457	0.293756	0.822213	0.58257	0.549635	51	53	0.524242	1.1613	0.111798	0.0267461	2.2152	112	97	0.523135	1.02329	0.270472	0.0504576
CNAG_00735	11	39	0.494033	0.624332	0.999845	0.206321	1.26375	212	181	25.3198	0.533906	0.506898	0.717356	0.34241	0.949415	38	13	0.626525	-1.5136	0.117242	0.0156981	-2.41586	12	13	0.480886	-0.00352433	0.999055	0.994153	-0.00732881	88	69	0.473699	0.485313	0.614104	0.305591	1.02452	79	100	0.461691	0.994041	0.1251	0.0313151	2.15305	234	213	0.459099	0.936887	0.235594	0.0412798
CNAG_00736	7	17	0.702005	0.0808292	0.999845	0.908334	0.11514	73	66	10.1877	0.786465	-0.160586	0.955193	0.838207	-0.204188	8	7	1.39269	0.983835		0.479921	0.70643	15	8	1.25276	1.57048	0.637424	0.209981	1.25362	32	38	1.44744	-0.528948		0.714785	-0.365437	35	33	1.2986	0.330738		0.798965	0.254687	74	90	1.32519	-0.411256		0.756305
CNAG_00737	1	7	1.15052	0.662584	0.999845	0.564682	0.575901	31	28	3.49258	1.29961	0.141535	0.978037	0.913278	0.108905	2	3	0.976165	-1.48411		0.128424	-1.52035	5	2	0.746523	-0.732364	0.754968	0.326576	-0.981034	8	6	0.798814	-1.31571		0.0995429	-1.64707	14	22	0.695413	-0.0457443	0.979936	0.947553	-0.0657801	39	22	0.7005	-0.600478	0.73438	0.391327
CNAG_00738	0	0	4.33311	0.42402	0.999845	0.922047	0.0978559	0	3	0.68963	4.43451	2.16844		0.624846	0.488993	0	1	2.19959	-0.471361		0.830317	-0.214295	1	3	1.74655	3.17245		0.0693075	1.81641	0	0	2.03383	-0.707581		0.727911	-0.347905	0	3	1.93572	-0.606234		0.754142	-0.313183	3	1	2.21552	-2.48229		0.26254
CNAG_00739	5	20	0.701244	0.00658738	0.999845	0.992505	0.00939385	53	72	9.76495	0.78725	-0.12834	0.967119	0.8705	-0.163024	9	6	2.35491	-1.85579		0.430667	-0.788051	7	5	2.00073	0.321811		0.872214	0.160847	25	19	2.15428	-0.722495		0.737341	-0.335377	32	49	1.9061	1.60008		0.401215	0.839453	92	59	1.95123	0.168254		0.931284
CNAG_00740	17	48	0.473405	-0.201874	0.999845	0.669794	-0.426431	168	134	27.4047	0.530101	-0.418202	0.779642	0.430165	-0.788909	26	10	0.832141	-0.204999	0.881141	0.805411	-0.246351	28	2	0.711486	0.0439618	0.989319	0.950731	0.0617888	75	80	0.687186	0.681116	0.625045	0.321604	0.991167	95	117	0.677489	0.469628	0.70794	0.488191	0.693188	187	187	0.65735	0.90978	0.507879	0.166355
CNAG_00741	40	207	0.493935	0.22598	0.999845	0.647304	0.45751	659	687	94.467	0.521405	-0.991997	0.310235	0.0570996	-1.90255	72	15	0.943698	-0.793493	0.600712	0.400441	-0.840834	61	21	0.729932	0.976807	0.598042	0.180826	1.33822	311	284	0.834686	-0.988271	0.543811	0.236412	-1.184	383	396	0.763589	-0.398414	0.793092	0.601834	-0.521765	783	755	0.72491	0.38695	0.844922	0.593487
CNAG_00742	15	28	0.627082	-0.262326	0.999845	0.675707	-0.418329	109	103	20.5396	0.662335	0.269133	0.911634	0.684493	0.40634	22	17	1.5124	-0.530228		0.725897	-0.350588	11	9	1.26844	-0.351213	0.95073	0.781868	-0.276886	39	36	1.19408	0.547719		0.646453	0.458696	87	82	1.13824	1.15888		0.308615	1.01813	127	160	1.13411	0.87804	0.771889	0.438804
CNAG_00743	21	58	0.507583	0.17388	0.999845	0.731926	0.342565	236	245	34.454	0.553019	-0.417516	0.79333	0.450264	-0.754976	36	10	1.46006	2.23379		0.126035	1.52993	21	14	1.52686	0.332238	0.958977	0.827744	0.217596	116	94	1.4918	0.736778		0.621388	0.493885	147	148	1.43782	0.919231		0.522612	0.639325	308	323	1.51719	-0.401171		0.791459
CNAG_00744	12	30	0.944683	-0.0866023	0.999845	0.926957	-0.0916735	98	123	19.7117	0.971546	0.265651	0.940861	0.784522	0.273431	42	4	2.27516	1.58239		0.486737	0.695508	24	13	2.27516	0.364832		0.872602	0.160355	54	51	2.45415	-0.60187		0.806266	-0.245246	69	54	2.14147	1.17347		0.583712	0.547971	129	129	2.1172	1.14656		0.588133
CNAG_00745	7	78	0.66919	0.673967	0.999845	0.313868	1.00714	277	283	31.1664	0.707094	-0.20583	0.938068	0.77098	-0.291093	34	10	1.62016	-0.883386		0.585584	-0.545246	18	16	1.30068	0.415598	0.94877	0.74933	0.319523	123	110	1.83512	-2.91494		0.112193	-1.58841	150	142	1.32151	-0.33536		0.799673	-0.25377	353	332	1.25729	0.772708	0.816509	0.538832
CNAG_00746	20	68	0.431839	-0.0553817	0.999845	0.897954	-0.128246	238	198	35.237	0.477858	-0.342921	0.809612	0.47299	-0.717622	37	13	1.03656	0.277916		0.788611	0.268115	36	10	0.893871	0.608642	0.851741	0.495931	0.680907	116	82	0.910492	0.422162		0.642889	0.463663	134	119	0.885508	0.355273	0.844995	0.688267	0.401208	302	309	0.844523	1.07372	0.55248	0.203591
CNAG_00747	27	102	0.362635	0.220187	0.999845	0.543728	0.607185	364	392	59.5627	0.402552	-0.378275	0.720201	0.347376	-0.939692	49	20	1.1511	0.29043		0.800805	0.252306	27	16	0.987096	0.825587	0.795417	0.402941	0.836379	179	137	1.04724	0.0482314		0.963266	0.0460555	183	218	0.998346	0.218134		0.827043	0.218495	447	409	0.976388	0.231553	0.94264	0.812539
CNAG_00748	1	4	1.54043	-1.65138	0.999845	0.28371	-1.07202	6	2	1.60593	1.68851	-0.171283		0.919201	-0.10144	2	1	2.29332	-2.44889		0.285594	-1.06784	2	0	1.87097	0.47008		0.801621	0.25125	8	6	1.97652	-0.614839		0.755746	-0.311072	6	2	1.84014	0.705448		0.701447	0.383367	19	13	1.85947	-0.128661		0.944837
CNAG_00749	0	0	4.62979	1.42507		0.758232	0.307804	0	6	0.518463	4.70483	2.86925		0.541959	0.609853	1	1	0.608808	-0.521293	0.593343	0.391859	-0.856252	1	0	0.54767	0.198887	0.942476	0.716492	0.363151	6	2	0.568359	-0.649624	0.561619	0.253047	-1.14298	2	1	0.564711	-1.01925	0.216395	0.0710891	-1.80491	7	1	0.541473	-0.149365	0.932385	0.782664
CNAG_00750	6	77	0.786901	1.85119	0.301617	0.0186474	2.35251	373	820	48.2039	0.820977	-0.135228	0.966856	0.869167	-0.164716	34	10	2.5591	-1.85488		0.468565	-0.724815	26	2	2.18208	1.19957		0.582499	0.549738	233	214	2.38101	-0.745652		0.754154	-0.313167	123	44	2.52994	-2.08825		0.409136	-0.825416	272	42	2.34698	-1.43859		0.539906
CNAG_00751	0	0	4.48456	0.408881		0.927353	0.0911753	1	2	0.457936	4.63718	0.349168		0.939978	0.0752974	0	0	0.70466	0.262016	0.833906	0.710017	0.371833	0	0	0.626367	0.554791	0.782516	0.375764	0.885728	5	3	0.656581	-0.108075	0.946092	0.869256	-0.164603	0	0	0.626562	0.143914	0.921242	0.818334	0.229689	1	0	0.613506	0.220167	0.90461	0.719694
CNAG_00752	4	22	0.731358	0.466165	0.999845	0.523867	0.637396	78	92	16.1235	0.781823	0.623755	0.775428	0.424975	0.797821	13	11	1.4637	-0.0353344		0.980741	-0.0241405	7	9	1.13816	1.20529	0.726209	0.289608	1.05898	42	27	1.14657	1.15279		0.314694	1.00542	61	65	1.09867	1.68198		0.125787	1.53093	131	129	1.07607	2.18889	0.238161	0.0419359
CNAG_00753	6	14	0.713719	-0.0776257	0.999845	0.913391	-0.108762	57	47	9.0098	0.785581	0.243106	0.934566	0.756972	0.30946	13	5	0.596848	-1.16659	0.199486	0.0506321	-1.95459	3	3	0.485496	-0.261783	0.905336	0.589743	-0.539209	27	15	0.467817	0.734757	0.38049	0.116273	1.57061	37	26	0.456921	1.26966	0.0338874	0.00545732	2.77872	74	50	0.456339	0.945474	0.222437	0.038278
CNAG_00754	22	120	0.397617	0.0797309	0.999845	0.841072	0.200522	383	321	60.2795	0.423336	0.0778786	0.959094	0.854042	0.183964	66	30	2.73678	-0.859633		0.753442	-0.314104	39	21	2.39906	1.95485		0.415164	0.81484	164	148	2.57066	0.251392		0.922097	0.0977931	255	226	2.40281	1.48306		0.537091	0.617218	443	491	2.39578	1.2176		0.611295
CNAG_00755	2	3	1.07172	0.639444	0.999845	0.550741	0.596651	19	25	4.89509	1.13781	1.60761	0.504982	0.157686	1.4129	6	5	1.31984	1.522		0.248842	1.15317	2	0	1.2724	0.905849	0.841426	0.476513	0.711923	10	9	1.26506	1.11484		0.378182	0.881251	15	11	1.26828	0.564478		0.656267	0.445073	15	23	1.42664	-1.37124	0.691253	0.336469
CNAG_00756	4	9	0.879435	0.0255631	0.999845	0.976811	0.0290676	37	36	7.12647	0.949914	0.563657	0.854096	0.552929	0.593377	14	2	6.76629	-0.858227		0.899068	-0.126839	6	3	6.69695	0.231788		0.97239	0.034611	17	10	6.76629	-1.99094		0.768572	-0.294243	18	22	6.76629	-2.48538		0.713381	-0.367319	26	45	6.68895	-0.427949		0.948987
CNAG_00757	10	30	0.679805	0.214045	0.999845	0.752866	0.314863	143	103	16.7845	0.727074	0.088996	0.973898	0.90258	0.122403	29	5	1.73452	0.692218		0.689831	0.399084	11	5	1.50455	1.6715		0.266585	1.11096	59	53	1.55962	0.911374		0.558981	0.584355	52	87	1.53454	0.74726		0.626287	0.48696	133	134	1.57378	-0.150321		0.923905
CNAG_00758	8	5	1.01292	-0.533086	0.999845	0.598689	-0.526287	27	41	8.43907	1.08471	-0.0875243	0.986808	0.935689	-0.080689	7	5	0.836231	0.549729		0.51093	0.65739	6	2	0.906068	-1.42363	0.487676	0.116132	-1.57122	12	19	0.823896	-0.403443		0.624363	-0.489676	39	24	0.856544	-1.33522	0.304493	0.119032	-1.55885	40	37	0.821418	-1.26488	0.435902	0.12359
CNAG_00759	1	3	1.3211	0.701497	0.999845	0.595423	0.530994	25	9	5.30406	1.33869	2.92716	0.206804	0.028773	2.18658	7	11	1.34732	-1.31997		0.327234	-0.9797	6	2	0.900966	1.2077	0.597181	0.1801	1.34045	6	4	0.968367	-0.0418895		0.965496	-0.0432579	9	3	0.943019	-0.153015	0.941328	0.871101	-0.16226	8	16	0.896897	0.534028	0.82206	0.551565
CNAG_00760	9	19	0.770979	0.449902	0.999845	0.559525	0.583547	105	114	18.6976	0.808883	0.611559	0.793175	0.449617	0.756054	15	15	1.73541	-0.427558		0.805393	-0.246373	11	3	1.64335	-1.12441		0.493837	-0.684218	62	54	1.55738	-0.347661		0.823353	-0.223235	79	72	1.73541	-2.05036		0.237409	-1.18149	121	135	1.50782	-0.659518		0.661822
CNAG_00761	7	27	0.618927	-0.380766	0.999845	0.53842	-0.615204	64	67	13.4065	0.762605	-1.17922	0.44505	0.122032	-1.5463	6	4	0.755507	-1.32944	0.252743	0.0784648	-1.75966	7	3	0.61707	0.276972	0.927173	0.65354	0.44885	28	22	0.62536	-0.0285171	0.982916	0.963628	-0.0456011	39	51	0.606771	0.61506	0.54814	0.310745	1.01366	86	74	0.601588	0.786932	0.53682	0.190842
CNAG_00762	2	8	1.02856	-0.478573	0.999845	0.641726	-0.465287	23	13	4.28296	1.18014	-0.264747	0.950988	0.822496	-0.224335	5	1	3.57677	0.495966		0.889716	0.138663	2	2	3.6035	-2.07662		0.564428	-0.576277	9	2	3.57969	-0.627521		0.860844	-0.1753	25	15	3.41106	0.482237		0.887574	0.141374	28	32	3.34397	1.47415		0.659329
CNAG_00764	10	28	0.580208	-0.187339	0.999845	0.746784	-0.322883	96	82	16.8303	0.655012	-0.353877	0.874847	0.589018	-0.54026	16	6	1.18221	-0.884918		0.454141	-0.748529	10	6	0.88534	0.838124	0.759264	0.343807	0.946669	56	37	1.59242	-3.54715		0.0259127	-2.22752	50	67	0.910814	-0.141096	0.941328	0.876891	-0.154912	108	107	0.903592	-0.403023	0.873855	0.655581
CNAG_00765	2	4	1.08992	0.710134	0.999845	0.514695	0.651545	21	33	4.58641	1.17264	1.1571	0.702802	0.323765	0.986751	4	5	0.832209	1.06624	0.4129	0.200117	1.28122	4	4	0.80231	0.711522	0.782363	0.375164	0.886841	14	15	0.852749	-0.477792	0.818785	0.575277	-0.560296	14	8	0.814838	-0.119444	0.945274	0.883459	-0.146586	24	30	0.784263	0.878262	0.621068	0.262775
CNAG_00766	2	44	0.866888	0.699457	0.999845	0.419747	0.80686	148	143	16.5416	0.920655	-0.124986	0.971428	0.892013	-0.135758	19	5	0.762988	0.161248	0.898246	0.832624	0.211337	18	6	0.673411	0.310417	0.922917	0.644826	0.460962	71	94	0.664626	0.622039	0.650232	0.349313	0.935924	101	62	0.648274	0.64549	0.557588	0.319393	0.995707	169	112	0.633382	0.940643	0.462913	0.137514
CNAG_00768	3	26	0.610793	0.714347	0.999845	0.242186	1.16954	114	103	18.0358	0.670317	0.549824	0.767658	0.412077	0.820245	17	9	1.25714	-0.541239		0.66681	-0.430531	13	3	1.03405	-0.0463104	0.990963	0.964278	-0.0447855	33	30	1.0276	0.126901		0.901717	0.123493	55	36	1.00038	0.0591601		0.952842	0.0591377	114	98	0.973253	0.239305	0.939733	0.805774
CNAG_00769	6	26	0.583706	0.345254	0.999845	0.554194	0.591487	114	87	17.222	0.650848	0.166434	0.94318	0.798168	0.255719	19	6	0.900105	0.628728	0.661907	0.484862	0.698505	10	2	0.784956	1.58634	0.272126	0.0432879	2.02092	48	51	0.898909	-0.488782	0.823496	0.586613	-0.543751	50	79	0.882044	-0.791888	0.610807	0.369299	-0.897788	97	105	0.806935	0.073547	0.984791	0.927378
CNAG_00770	5	21	0.813299	0.517463	0.999845	0.524612	0.636252	74	109	14.6856	0.867528	0.360915	0.908593	0.67739	0.416027	7	12	1.53956	-3.03372		0.0487794	-1.97051	13	2	0.773575	0.728457	0.760475	0.346359	0.941675	34	39	0.903323	-1.27502		0.158104	-1.41148	60	51	1.25359	-3.6451	0.0243296	0.00364066	-2.90773	101	74	0.831885	-1.34124	0.407519	0.106898
CNAG_00771	69	208	0.384491	-0.247693	0.999845	0.519439	-0.64421	659	585	131.298	0.397656	-0.0417106	0.978736	0.916462	-0.104891	158	49	1.67006	-1.77818		0.286995	-1.06474	92	40	1.1713	-0.672234	0.892234	0.566021	-0.573921	298	262	1.4095	-1.89687		0.178375	-1.34578	391	422	1.04991	0.372506		0.72274	0.354799	837	847	1.03473	0.296071	0.930345	0.774775
CNAG_00772	9	70	0.672792	0.327441	0.999845	0.626478	0.48669	223	209	35.7043	0.706103	-0.0347541	0.991493	0.960744	-0.0492195	16	23	1.96009	1.4029		0.474155	0.715735	13	13	1.99615	-0.138152		0.944823	-0.0692094	89	93	2.24921	-1.48819		0.508195	-0.66165	137	108	2.07073	-1.04541		0.613664	-0.50485	237	225	1.9792	-0.809971		0.682363
CNAG_00773	6	10	0.899878	-0.581544	0.999845	0.518119	-0.646248	34	30	6.69218	0.974133	0.024117	0.994371	0.980248	0.0247574	11	3	0.756412	-0.626287	0.605296	0.407687	-0.827971	13	1	0.648114	0.254188	0.938238	0.694913	0.392196	11	16	0.635893	0.948708	0.410202	0.135718	1.49193	15	13	0.624619	1.32805	0.130701	0.0334889	2.12617	34	42	0.624327	0.953168	0.441875	0.126832
CNAG_00774	10	80	0.651673	0.0651797	0.999845	0.920329	0.100019	220	188	28.3126	0.730025	-1.40619	0.300499	0.0540767	-1.92622	19	3	0.880662	-0.557778	0.698124	0.526498	-0.633362	15	8	0.719102	0.5541	0.821006	0.440977	0.770544	103	78	0.768188	-0.444349	0.81323	0.562968	-0.578438	126	149	0.714065	0.321425	0.819598	0.652614	0.450133	234	277	0.698565	0.601809	0.733921	0.388967
CNAG_00775	4	12	0.818562	0.070701	0.999845	0.931171	0.0863722	44	44	7.04312	0.912472	0.082472	0.983652	0.927983	0.0903831	8	4	1.20982	0.665527		0.582247	0.550106	5	1	1.12116	0.532009	0.917987	0.63513	0.474519	23	18	1.18575	-0.234208		0.843422	-0.197519	34	31	1.09652	0.63238		0.564132	0.576715	61	71	1.07845	0.742482	0.797049	0.491156
CNAG_00776	155	666	0.349981	0.0558584	0.999845	0.873193	0.159604	2359	1798	297.066	0.358712	-0.628283	0.366937	0.0798603	-1.7515	275	94	1.12288	1.03437		0.356957	0.92118	183	82	1.09255	0.181941	0.970958	0.867741	0.166528	946	846	1.16923	-0.537563		0.64569	-0.459758	1121	1091	1.07382	0.0489835		0.963616	0.0456163	2456	2803	1.14244	-1.19435	0.655308	0.295817
CNAG_00777	20	65	0.709937	-0.18309	0.999845	0.796487	-0.257896	192	199	29.2764	0.767014	-1.23793	0.423141	0.106536	-1.61396	28	2	1.70823	-1.4146		0.40761	-0.828108	17	14	1.13191	0.91826	0.804491	0.417224	0.811247	77	75	1.16473	0.492649		0.672316	0.422971	117	122	1.17074	-0.0814989		0.944502	-0.0696131	251	238	1.15885	-0.326476		0.778155
CNAG_00778	17	15	0.897581	-0.471633	0.999845	0.599271	-0.525449	69	101	18.5595	0.933176	-0.0970884	0.979026	0.917137	-0.104041	29	5	1.41168	-1.23736	0.582898	0.380747	-0.876521	11	2	1.25265	0.438711	0.947054	0.726169	0.350226	39	37	1.25536	0.406393	0.897177	0.746146	0.323726	48	49	1.26521	-0.52525	0.838903	0.678033	-0.415148	88	65	1.24121	0.459348	0.900579	0.711321
CNAG_00779	104	287	0.347856	0.0653982	0.999845	0.850874	0.188004	1179	1058	198.701	0.363929	-0.628388	0.377144	0.0842257	-1.72668	143	52	1.24217	1.04354		0.400853	0.840099	106	45	1.17912	0.580426	0.915372	0.622541	0.492252	490	412	1.21191	0.232491		0.847869	0.191838	667	657	1.1498	0.702711		0.541093	0.611161	1333	1232	1.2146	-0.697896	0.83109	0.565569
CNAG_00780	3	3	1.13715	0.0024532	0.999845	0.998279	0.00215731	14	24	5.18965	1.1931	1.25745	0.672527	0.291912	1.05394	5	6	0.587564	-0.440362	0.638643	0.453573	-0.749472	8	3	0.530112	-0.239693	0.926042	0.651158	-0.452155	6	11	0.523537	0.146964	0.911552	0.778929	0.280715	12	19	0.51484	0.132672	0.908968	0.796643	0.257695	11	18	0.509864	0.0967225	0.952331	0.849542
CNAG_00781	9	15	0.86587	-1.071	0.999845	0.216121	-1.23691	45	25	12.6332	0.91626	-0.054204	0.989641	0.952826	-0.0591579	15	5	6.68991	-1.85126		0.781992	-0.276724	11	3	6.61977	-0.761246		0.908448	-0.114996	24	26	6.68991	-2.98397		0.655568	-0.44604	41	38	6.68991	-3.47842		0.603099	-0.51995	52	77	6.59571	-1.09374		0.868294
CNAG_00782	1	9	0.964735	0.913177	0.999845	0.343865	0.946557	30	56	6.26705	1.03726	1.10474	0.669291	0.286852	1.06505	8	5	1.17515	1.31314		0.263815	1.11742	2	3	1.03131	2.25508	0.205704	0.0287705	2.18662	26	30	1.04794	1.88656		0.0718203	1.80026	11	9	1.03217	1.82169	0.228789	0.0775765	1.76492	19	19	1.01388	2.14036	0.21076	0.0347664
CNAG_00783	7	27	0.620014	-0.875401	0.999845	0.157978	-1.41191	46	47	11.3246	0.886534	-2.19231	0.129839	0.0134022	-2.4729	3	2	6.71361	2.67343		0.690475	0.398211	9	5	6.75379	0.926135		0.890929	0.137128	14	25	6.76668	-0.551636		0.935027	-0.0815223	21	30	6.76668	-1.04608		0.877142	-0.154593	53	48	6.7578	-0.0796782		0.990593
CNAG_00784	3	2	1.28123	-0.536785	0.999845	0.675246	-0.41896	14	10	4.04029	1.33202	1.14611	0.751532	0.389552	0.860429	6	4	1.59604	-0.438766		0.783386	-0.27491	14	2	1.48021	-1.03576		0.48409	-0.69974	4	16	1.57256	-1.45956		0.353334	-0.928142	14	23	1.41583	-0.985269		0.486493	-0.695897	25	19	1.29557	0.155456		0.904491
CNAG_00785	171	427	0.398576	-0.364382	0.999845	0.360607	-0.91421	1409	1220	250.732	0.407974	-0.712162	0.370226	0.0808796	-1.74561	226	72	0.838137	1.88119	0.145536	0.0248011	2.24449	142	63	0.80855	1.40494	0.405896	0.0822803	1.73761	590	498	0.793616	2.08599	0.0822736	0.00857725	2.62846	770	983	0.786884	1.94498	0.0688433	0.0134454	2.47175	1775	1897	0.784373	1.69916	0.190659	0.0302907
CNAG_00786	6	8	0.890857	-0.518568	0.999845	0.560499	-0.5821	36	25	7.35245	1.34167	-2.52338	0.317071	0.0600029	-1.88077	1	1	0.806519	1.55972	0.204635	0.0531264	1.93389	3	3	0.800458	0.461781	0.891758	0.56401	0.576896	6	5	0.810039	0.356661	0.864791	0.659719	0.440301	17	13	0.759066	1.37972	0.21162	0.0691167	1.81766	20	52	0.749644	1.54965	0.223858	0.038717
CNAG_00787	8	34	0.567247	-0.0424751	0.999845	0.940311	-0.0748794	92	109	18.8878	0.628307	-0.0586793	0.983157	0.925592	-0.0933927	21	7	1.58323	-2.45265		0.121348	-1.54914	8	2	0.885085	0.514971	0.890276	0.56068	0.581832	68	51	1.18151	-2.06114		0.0810716	-1.7445	55	52	0.935015	-0.724473		0.438443	-0.774825	125	99	0.908321	-0.736852	0.758425	0.417237
CNAG_00788	36	167	0.389888	-0.0685654	0.999845	0.860404	-0.175859	511	421	80.7545	0.411459	-0.164866	0.913397	0.688651	-0.400687	84	36	1.10668	-0.0274145		0.980237	-0.0247718	43	22	0.910006	0.852211	0.762245	0.349021	0.936489	239	226	0.933863	0.498256		0.593658	0.533543	320	336	0.892542	0.872784	0.566731	0.328142	0.977863	626	663	0.875496	1.04198	0.59028	0.233984
CNAG_00789	0	1	1.61595	1.77439	0.999845	0.272184	1.09805	10	9	3.04185	1.69524	2.99871		0.0769103	1.7689	4	2	0.587085	-0.340652	0.725453	0.56175	-0.580244	6	1	0.585322	-1.47506	0.103362	0.0117326	-2.52009	1	1	0.580683	-1.02572	0.311709	0.0773288	-1.7664	3	1	0.569232	-0.0209775	0.989659	0.970603	-0.0368523	3	2	0.569544	-0.497616	0.729674	0.382276
CNAG_00790	5	19	0.627292	0.473137	0.999845	0.450697	0.754253	92	76	11.6868	0.726922	-0.124826	0.963656	0.863659	-0.171718	10	5	1.69314	-1.00948		0.551032	-0.596214	16	8	1.03245	4.53375	0.000169847	1.1271e-05	4.39123	48	50	1.32329	-0.597052		0.651855	-0.451187	59	56	1.13703	0.443842	0.850925	0.696277	0.390351	94	102	1.11494	0.367885	0.91747	0.741431
CNAG_00791	6	5	1.19441	0.14473	0.999845	0.903554	0.121174	45	43	8.52586	1.24823	0.465403	0.920729	0.70926	0.37285	17	1	0.922113	-1.1416		0.215708	-1.23802	10	3	0.746732	-0.62885	0.792754	0.399712	-0.842136	15	15	0.802846	-1.29359		0.107125	-1.61125	18	21	0.747303	-1.04665	0.368827	0.161345	-1.40056	41	40	0.729688	-1.12696	0.434157	0.122482
CNAG_00792	14	58	0.442218	0.324574	0.999845	0.462968	0.733969	233	214	36.5177	0.474357	0.465313	0.704121	0.326625	0.980934	43	23	0.556318	1.05305	0.21448	0.0583728	1.89289	33	3	0.531739	0.632662	0.664603	0.234125	1.1898	136	74	0.548855	0.124799	0.918001	0.820128	0.22738	117	114	0.532715	0.188306	0.87135	0.723726	0.353484	289	287	0.51628	0.689778	0.523484	0.181531
CNAG_00793	10	18	0.89536	-0.662983	0.999845	0.459018	-0.740465	58	49	11.9759	0.995153	-1.08015	0.659478	0.27774	-1.08541	5	5	1.08723	-4.04112	0.00963591	0.000201673	-3.71691	11	6	0.709217	-0.625065	0.783135	0.378131	-0.881346	17	18	0.722123	-1.22943	0.334536	0.0886588	-1.70252	32	32	0.702556	-0.457903	0.72572	0.514551	-0.651767	70	73	0.701815	-0.785986	0.621068	0.262742
CNAG_00794	9	10	0.851534	-0.889353	0.999845	0.296295	-1.04441	31	37	10.3828	0.883556	0.644848	0.804452	0.465493	0.729832	14	11	1.25196	-0.0169358		0.989207	-0.0135275	1	4	1.12035	0.0984515	0.985461	0.929976	0.0878754	14	9	1.17126	-0.45885		0.695237	-0.391758	20	19	1.21838	-1.38682		0.255016	-1.13825	24	41	1.11102	-0.558639		0.615094
CNAG_00795	0	0	4.83876	0.816212		0.866047	0.168682	2	2	0.0905186	4.99758	0.349167		0.944299	0.0698673	0	0	1.02178	0.566903	0.739938	0.579017	0.554821	0	0	0.862697	1.25443	0.54544	0.145924	1.45408	1	1	0.883629	0.926465	0.607393	0.294419	1.04848	0	1	0.868306	0.723895	0.639541	0.404458	0.833687	0	0	0.840382	1.04194	0.567213	0.215034
CNAG_00796	10	53	0.544061	0.15927	0.999845	0.769719	0.292742	146	186	25.3118	0.584695	0.115585	0.955718	0.843293	0.197684	35	11	0.951674	0.987338		0.299514	1.03748	24	5	0.886763	0.872564	0.75471	0.325122	0.983987	104	61	0.915819	0.374301		0.682755	0.408706	90	114	0.987901	-1.03465	0.531631	0.294952	-1.04732	201	229	0.929274	-0.739462	0.764523	0.426182
CNAG_00797	37	104	0.432632	-0.129441	0.999845	0.764792	-0.299195	351	345	58.4456	0.472577	-0.829179	0.364954	0.0793292	-1.75459	49	13	0.766518	-0.464347	0.711611	0.544656	-0.605788	32	11	0.626069	1.29977	0.248829	0.0378862	2.07608	136	137	0.727754	-1.15789	0.375466	0.1116	-1.59104	217	236	0.669494	-0.673443	0.553112	0.314464	-1.0059	385	461	0.649159	-0.527919	0.757488	0.416083
CNAG_00798	2	2	1.29976	0.418255	0.999845	0.747609	0.321794	9	24	5.76234	1.31445	2.77134	0.234288	0.0349986	2.10837	9	11	1.14224	1.7706		0.121114	1.55011	6	5	1.07496	1.55538	0.548126	0.147918	1.44693	4	8	1.11446	0.982127		0.378177	0.88126	9	3	1.05478	1.62972	0.3092	0.122327	1.54508	16	8	1.06693	0.916227	0.734044	0.390478
CNAG_00799	59	212	0.30904	-0.0629896	0.999845	0.838492	-0.203823	690	631	114.233	0.326367	-0.0318187	0.981857	0.922335	-0.0974935	128	57	0.874776	-1.47662	0.272705	0.0914125	-1.68799	98	31	0.706476	-0.69274	0.754968	0.326811	-0.980557	335	267	0.722509	-0.929444	0.501085	0.198299	-1.28641	352	394	0.669715	0.0965085	0.946664	0.885419	0.144104	861	982	0.674616	-0.532212	0.767566	0.430164
CNAG_00800	2	3	1.32485	0.78269	0.999845	0.554671	0.590776	23	28	6.12	1.38961	1.39633	0.69474	0.314977	1.00483	1	7	1.77659	4.18058		0.018615	2.35315	2	0	2.16332	0.795066	0.942314	0.71323	0.367522	15	10	1.94619	1.7964		0.355989	0.923035	6	15	1.74345	2.98004		0.0873989	1.70928	23	28	1.67079	4.39955	0.0705206	0.00845806
CNAG_00801	1	6	1.31262	-1.13776	0.999845	0.386059	-0.866787	7	8	2.56589	1.35813	0.967724		0.47613	0.71254	4	4	1.69272	0.516127		0.760435	0.30491	4	2	2.05471	-3.66617		0.0743796	-1.78427	6	5	2.00546	-2.18362		0.276226	-1.08884	8	2	1.70336	-1.1818		0.487802	-0.693809	3	6	1.54035	0.13774		0.928747
CNAG_00802	1	9	1.03595	0.105834	0.999845	0.918628	0.102162	26	23	4.31289	1.22136	-0.368026	0.935637	0.763167	-0.301325	4	1	0.745227	1.12959	0.331163	0.129578	1.51577	1	1	0.701788	0.767353	0.710503	0.274207	1.09342	11	7	0.709023	0.67828	0.641069	0.338749	0.95664	8	10	0.693312	0.596933	0.628023	0.389245	0.860987	25	24	0.6889	0.330921	0.860795	0.63097
CNAG_00803	8	40	0.479002	0.483882	0.999845	0.312405	1.01019	176	149	27.7459	0.5151	0.769713	0.46916	0.135098	1.4943	37	17	1.03609	1.33623		0.197158	1.28969	44	16	0.971665	1.20244	0.646365	0.215899	1.23751	106	120	1.63527	-2.87419		0.0788119	-1.75762	114	90	1.09106	-0.854737		0.433392	-0.7834	160	190	1.03629	-0.695476	0.798461	0.502143
CNAG_00804	7	16	0.63298	0.0795274	0.999845	0.900017	0.12564	65	68	12.845	0.74263	-0.365034	0.88865	0.623043	-0.491542	8	5	3.61002	0.495561		0.890814	0.137274	7	1	3.39666	1.77017		0.602261	0.521151	42	35	3.44737	0.966422		0.77922	0.280336	43	38	3.63645	-2.48603		0.494202	-0.683642	94	83	3.51365	-0.644829		0.854389
CNAG_00805	3	10	0.857621	-0.231458	0.999845	0.78725	-0.269883	33	24	6.07522	1.01658	-0.461954	0.897037	0.649526	-0.454421	6	1	1.22297	-0.949383		0.437575	-0.776295	4	1	1.04723	-1.02917	0.75471	0.325724	-0.982762	20	22	1.03212	-0.808475		0.433443	-0.783314	27	19	0.937859	0.022219		0.981099	0.0236912	52	31	0.901177	0.741388	0.754365	0.410685
CNAG_00806	50	96	0.525216	-0.324599	0.999845	0.536556	-0.61803	373	332	61.2892	0.567877	-1.3744	0.14374	0.0155102	-2.42024	38	11	0.755604	1.02532	0.381886	0.174797	1.35695	38	15	0.697425	0.83286	0.6627	0.232403	1.19419	138	139	0.699788	0.861615	0.523055	0.218229	1.23125	164	193	0.67234	1.19568	0.2259	0.0753405	1.77839	429	446	0.667631	0.99055	0.463821	0.137894
CNAG_00807	10	96	0.564341	0.62155	0.999845	0.270735	1.10137	370	321	40.1145	0.597882	-0.149626	0.945492	0.802387	-0.250259	35	19	0.732649	-0.672996	0.563319	0.358316	-0.918579	32	14	0.61575	-0.246344	0.93703	0.689104	-0.400071	143	131	0.63176	-0.499066	0.708454	0.42955	-0.789962	122	163	0.617929	-0.704034	0.490073	0.25456	-1.13934	343	322	0.591393	-0.343338	0.829191	0.561538
CNAG_00808	14	54	0.466139	0.253451	0.999845	0.586631	0.543724	185	221	32.9091	0.520396	-0.270471	0.880461	0.603243	-0.519742	22	15	0.687197	0.267118	0.826774	0.697494	0.388706	16	5	0.629282	0.343865	0.903021	0.584763	0.546441	104	60	0.627857	0.491296	0.713116	0.433922	0.782497	104	107	0.602366	1.37689	0.0983294	0.0222654	2.28581	232	238	0.608709	0.491814	0.759268	0.419112
CNAG_00809	32	96	0.394376	-0.290628	0.999845	0.461164	-0.736932	312	243	55.8039	0.422345	-0.0972219	0.949483	0.81794	-0.230195	63	25	1.07965	0.410712		0.703639	0.380413	46	11	0.965902	0.920371	0.757436	0.34066	0.952862	109	92	1.12034	-1.06767		0.340597	-0.952986	167	227	1.00903	-0.366817		0.716204	-0.363536	390	401	0.984534	-0.331262	0.914766	0.736519
CNAG_00810	3	8	0.788353	0.499151	0.999845	0.526631	0.633157	44	38	7.52211	0.856385	1.05655	0.58778	0.217304	1.23373	10	6	1.5658	-2.23156		0.154103	-1.42519	2	4	0.889144	0.262714	0.94877	0.767636	0.295469	23	10	0.867838	0.739404		0.39421	0.852007	37	37	0.828086	1.41069	0.25024	0.0884642	1.70356	58	80	0.821023	1.3527	0.393942	0.099438
CNAG_00811	14	39	0.538017	-0.171652	0.999845	0.749691	-0.319046	125	127	22.8515	0.600723	-0.44775	0.795644	0.456059	-0.745352	24	6	2.32794	-1.07224		0.645088	-0.460597	19	6	2.14241	-1.22298		0.568108	-0.57084	65	63	2.31338	-2.05774		0.373738	-0.889493	90	88	2.32514	-2.56869		0.26927	-1.10475	175	151	2.04182	-1.28182		0.530148
CNAG_00812	11	15	0.750283	0.252029	0.999845	0.736937	0.335912	111	86	13.7865	0.886523	-1.23592	0.515017	0.163281	-1.39412	8	2	2.41811	-1.07532		0.656542	-0.444692	11	8	2.43481	-2.18435		0.369647	-0.897135	35	38	2.46088	-3.58184		0.145527	-1.45551	63	49	2.21533	-1.46963		0.507081	-0.66339	86	115	2.23948	-2.03325		0.363923
CNAG_00813	183	735	1.05717	-3.55092	0.0171507	0.000782513	-3.35891	198	189	12035.5	1.05537	1.2955	0.590704	0.219621	1.22754	97	934	0.596574	2.40496	0.00444346	5.54739e-05	4.03128	1445	675	0.63105	-1.39585	0.196135	0.02697	-2.21195	113	108	0.626779	-1.13325	0.293311	0.0705991	-1.80805	312	220	0.615258	-1.09102	0.226703	0.0761833	-1.77327	425	246	0.611507	-1.26757	0.222121	0.0381848
CNAG_00814	320	2302	0.896775	-4.98764	9.59629e-07	2.6708e-08	-5.56175	237	118	8791.49	0.893845	1.26822	0.503313	0.155946	1.41884	614	2081	0.909273	1.02246	0.481634	0.26081	1.12448	2805	1737	0.910037	-7.15442	2.15084e-13	3.79018e-15	-7.86168	82	100	0.909287	-1.79347	0.235588	0.0485648	-1.97239	934	590	0.909342	-4.18903	5.44357e-05	4.09186e-06	-4.60666	422	142	0.910144	-8.14336	2.83141e-17	3.64201e-19
CNAG_00815	2	17	0.83102	0.901319	0.999845	0.278102	1.08459	80	80	13.4855	0.866526	1.43759	0.406079	0.0971099	1.65903	11	16	0.552907	-0.850422	0.324953	0.124026	-1.53809	13	14	0.465376	0.150596	0.94877	0.74624	0.323601	41	47	0.458633	0.674741	0.418397	0.141237	1.4712	49	50	0.450355	0.931121	0.144169	0.0386844	2.06753	74	88	0.451023	0.447166	0.679851	0.321467
CNAG_00816	11	43	0.475161	-0.203229	0.999845	0.668865	-0.427706	120	115	32.9805	0.519312	0.220275	0.905313	0.671444	0.424167	35	10	1.91676	2.69377		0.15991	1.40538	18	7	1.85662	2.39114	0.615527	0.197782	1.2879	70	53	1.90829	1.6618		0.383846	0.870831	75	75	1.92035	1.02383		0.593931	0.533149	142	142	1.82999	2.28489	0.564166	0.21182
CNAG_00817	3	0	1.67864	0.129081	0.999845	0.938706	0.0768959	24	8	7.10579	1.69128	2.46254	0.489341	0.145386	1.45602	3	13	1.87316	-1.46639		0.433719	-0.782844	8	3	1.37293	0.547425		0.690093	0.398729	3	3	1.87967	-2.59266		0.167795	-1.37932	6	17	1.33144	1.11903		0.400648	0.840465	12	16	1.55067	-1.97923		0.201826
CNAG_00818	2	1	1.50887	-0.489667	0.999845	0.745541	-0.324525	6	9	2.86053	1.57212	1.25611		0.424298	0.798987	5	2	2.35964	1.6046		0.496494	0.680016	1	0	2.66969	-3.07937		0.248723	-1.15346	4	2	2.42339	-0.204211		0.932844	-0.0842666	7	6	2.41716	-0.650621		0.787801	-0.269167	11	5	2.31875	0.218479		0.924932
CNAG_00819	118	265	0.441698	-0.269676	0.999845	0.541502	-0.610544	1017	836	204.855	0.448141	0.181331	0.912174	0.685749	0.40463	193	131	1.95644	3.52267		0.0717737	1.80055	187	74	1.99898	1.59659		0.424464	0.798701	430	379	1.93919	2.79274		0.149823	1.44016	688	672	2.01809	0.959288		0.634541	0.475345	1313	1245	1.95584	1.49127		0.44578
CNAG_00820	2	4	1.20766	-0.42307	0.999845	0.726097	-0.350323	12	13	4.83146	1.32117	0.412694	0.933917	0.754759	0.31237	1	4	2.25893	1.40331		0.534451	0.621226	3	2	2.10936	1.36675		0.517021	0.647944	12	4	2.45162	-1.99288		0.416283	-0.812886	10	10	2.24989	-0.169605		0.93991	-0.0753835	17	12	2.06299	1.23184		0.550433
CNAG_00821	93	289	0.347505	-0.0235373	0.999845	0.945999	-0.0677322	1042	947	158.977	0.370073	-1.03732	0.06415	0.00506263	-2.80302	105	35	2.68345	2.09709		0.434514	0.781491	85	24	2.65036	1.25204		0.636639	0.472403	438	396	2.70012	0.792599		0.769108	0.293542	566	530	2.61653	1.4022		0.592028	0.535899	1243	1138	2.6161	1.00456		0.700985
CNAG_00822	16	27	0.670759	-0.598314	0.999845	0.372396	-0.891995	104	70	22.2859	0.711981	-0.100191	0.971428	0.88809	-0.140721	29	7	6.76668	0.581073		0.931568	0.0858726	17	4	6.76668	-0.636661		0.92504	-0.0940876	49	50	6.73956	1.17443		0.861661	0.17426	74	97	6.76668	-1.04608		0.877142	-0.154593	153	166	6.7578	-0.0796718		0.990593
CNAG_00823	3	38	1.01412	1.15866	0.999845	0.253234	1.14253	138	231	36.7177	1.02424	1.99638	0.291222	0.0512791	1.94914	37	41	1.21322	1.28557		0.289309	1.05964	37	31	1.13648	1.2684	0.700333	0.26439	1.11608	133	116	1.1979	0.332336		0.781448	0.277433	44	25	1.29327	-1.04989		0.416901	-0.81181	36	30	1.13572	0.478212	0.882678	0.673708
CNAG_00824	7	8	0.854118	-0.271588	0.999845	0.750504	-0.317975	36	44	8.52365	0.943698	-0.124221	0.971516	0.895276	-0.131632	8	4	2.36353	2.07734		0.379448	0.878913	5	1	1.98138	4.83174		0.0147457	2.43857	13	13	2.38364	0.842767		0.723667	0.353562	15	17	2.19962	1.39429		0.52616	0.633879	35	35	2.03581	2.58617		0.203964
CNAG_00825	3	5	1.14487	-0.432281	0.999845	0.705742	-0.377581	21	14	4.9316	1.29633	-0.298625	0.949483	0.81781	-0.230362	6	0	1.48324	-3.84065	0.0892955	0.00961516	-2.58937	10	1	0.648317	0.150042	0.956309	0.816978	0.231434	11	10	0.702	-0.942844	0.47602	0.179245	-1.34308	20	22	0.64082	0.0139398	0.993278	0.982645	0.021753	37	34	0.644222	-0.518267	0.760386	0.421116
CNAG_00826	4	11	0.90395	0.186461	0.999845	0.836577	0.206274	40	51	5.20087	1.0877	-0.938895	0.750054	0.388032	-0.863191	5	1	1.46042	-0.446289		0.759917	-0.30559	0	0	1.26627	-0.613383	0.916505	0.628101	-0.484401	22	21	1.21507	-0.119838		0.921435	-0.0986266	9	8	1.13622	0.345879		0.760814	0.304413	45	15	1.09431	0.863097	0.767566	0.43028
CNAG_00827	0	0	2.56276	0.407184	0.999845	0.87376	0.158885	1	2	1.06918	2.55215	3.54977		0.164258	1.39089	1	2	1.93008	-2.86441		0.137785	-1.48409	0	0	1.37411	0.454012		0.741094	0.330405	3	1	1.87654	-2.59532		0.166654	-1.38303	4	0	1.33885	0.772255		0.564072	0.576804	3	0	1.34222	0.280954		0.834198
CNAG_00828	0	5	1.44524	1.34889	0.999845	0.350649	0.933332	27	26	9.32478	1.46916	2.92336	0.276469	0.046612	1.98981	3	13	1.90789	-0.971165		0.610734	-0.509026	1	0	1.50354	0.0865178		0.954113	0.0575426	11	12	1.51339	0.0766184		0.959623	0.0506269	23	11	1.41897	0.964547		0.496662	0.679751	15	17	1.44906	-0.0258499		0.985767
CNAG_00829	9	46	0.578977	-0.42764	0.999845	0.460142	-0.738613	109	86	19.2607	0.636721	-0.346446	0.874228	0.586366	-0.54411	19	9	4.11358	1.9304		0.638873	0.469275	15	4	4.11729	0.894488		0.828012	0.217252	31	58	4.11607	0.80731		0.844503	0.196136	83	71	4.12014	0.329022		0.936351	0.0798569	120	153	4.12098	-0.072026		0.986055
CNAG_00830	2	7	0.856129	1.21468	0.999845	0.155957	1.4188	45	61	8.38399	1.02969	0.0218435	0.994371	0.983075	0.0212137	3	3	0.953019	2.04409	0.162244	0.0319642	2.14486	7	2	0.938517	1.11349	0.666269	0.235453	1.18643	28	24	0.977684	0.51031	0.83384	0.601699	0.521958	17	10	1.12514	-1.34937	0.461793	0.230413	-1.1993	45	37	0.897233	1.67924	0.30254	0.0612653
CNAG_00831	3	7	0.954127	-0.479806	0.999845	0.615053	-0.502874	18	21	10.608	0.961821	2.20568	0.175346	0.0218345	2.29324	14	16	2.17017	-2.05843		0.34287	-0.948509	10	3	1.88437	-1.65681		0.379272	-0.879238	14	6	1.90984	-1.74999		0.359509	-0.916301	20	14	2.1842	-3.6661		0.0932564	-1.67846	32	26	1.90209	-2.59813		0.17196
CNAG_00832	2	4	1.26284	0.468146	0.999845	0.710854	0.370709	31	16	2.65586	1.60964	-1.13153		0.482073	-0.702973	1	1	6.76668	0.581073		0.931568	0.0858726	5	0	6.76154	0.763357		0.910112	0.112897	13	9	6.76668	-0.551636		0.935027	-0.0815223	12	17	6.76668	-1.04608		0.877142	-0.154593	18	23	6.6664	1.5155		0.820164
CNAG_00833	1	3	1.79315	-0.923918	0.999845	0.60638	-0.515247	3	8	1.63212	1.8676	0.802265		0.667508	0.429571	1	3	2.36288	3.70858		0.116528	1.56952	2	0	2.43128	1.88901		0.437181	0.776962	3	3	2.59429	0.972087		0.707882	0.374702	8	1	2.30455	2.85152		0.21596	1.23734	2	2	2.29666	2.59007		0.259422
CNAG_00834	17	136	0.587943	0.686177	0.999845	0.243178	1.16708	539	517	52.1204	0.627841	-0.965438	0.44825	0.12412	-1.53771	41	9	2.12519	-1.86159		0.381049	-0.875966	41	54	1.77211	-0.0754997		0.966017	-0.0426043	243	249	1.64868	1.34268		0.415419	0.814395	257	234	1.73568	-0.194238		0.910895	-0.111909	589	592	1.61491	1.15221		0.475548
CNAG_00835	1	2	1.38183	1.18213	0.999845	0.392285	0.85548	19	18	2.39072	1.52468	1.09854		0.471215	0.720504	4	1	1.56086	-0.437996		0.779008	-0.280612	5	1	1.49323	-1.05943		0.47802	-0.709491	6	5	1.5026	-1.06357		0.479058	-0.707819	6	13	1.9367	-3.88341		0.0449452	-2.00517	18	14	1.45301	-1.35983		0.349339
CNAG_00836	2	6	1.01378	1.16533	0.999845	0.250354	1.14949	32	61	4.72643	1.19821	-0.14169	0.975243	0.905868	-0.118252	3	2	3.39862	3.33394		0.326608	0.980969	1	3	3.37732	2.3548		0.485652	0.697241	27	16	3.52844	1.06731		0.76228	0.302488	16	13	3.53714	0.534807		0.87982	0.151198	30	28	3.55582	-0.0675483		0.984844
CNAG_00837	10	47	0.752998	1.93343	0.182457	0.0102394	2.56764	433	607	39.9786	0.800986	-0.300188	0.920729	0.707829	-0.374773	27	6	1.55655	-1.01795		0.513128	-0.653975	13	5	1.24725	0.368971		0.767361	0.295829	781	707	1.55655	-2.1472		0.167754	-1.37946	63	37	1.81636	-3.65875		0.0439751	-2.01433	194	80	1.25718	-0.632209		0.615049
CNAG_00838	0	0	2.32195	1.81083	0.999845	0.435464	0.779876	5	3	1.04732	2.42591	3.28853		0.175231	1.35559	2	1	2.41922	-0.860229		0.722154	-0.355582	1	1	2.05336	1.59244		0.438028	0.775528	3	3	2.12007	0.977285		0.644822	0.460968	4	2	2.21349	-0.164741		0.940672	-0.0744258	8	9	1.99464	1.89124		0.343048
CNAG_00839	0	5	1.43984	0.258707	0.999845	0.857406	0.179677	13	12	3.6109	1.47152	2.21679	0.462832	0.131949	1.50646	4	7	2.15662	-0.210649		0.92219	-0.0976755	6	4	2.13219	-1.29967		0.542161	-0.609548	1	3	2.35089	-3.57691		0.128131	-1.52152	8	5	2.04148	-1.09449		0.591874	-0.536123	12	13	1.96793	-0.738122		0.707604
CNAG_00840	1	2	1.87364	-1.76062	0.999845	0.347383	-0.939678	3	2	1.13681	2.08625	-0.382587		0.854496	-0.183385	2	0	1.63044	-0.129215		0.936832	-0.0792519	1	0	1.31423	1.25077	0.757923	0.34124	0.951719	16	9	1.38431	0.331122		0.810953	0.239196	5	0	1.30501	1.04734		0.422231	0.802556	1	3	1.2743	1.59907	0.561449	0.209531
CNAG_00841	2	5	1.114	0.586078	0.999845	0.598816	0.526103	13	43	5.44461	1.17697	1.30439	0.649273	0.267748	1.10826	7	5	2.10388	-3.4439		0.101645	-1.63693	8	7	1.66707	-0.954978		0.566747	-0.572849	47	19	1.873	-2.29739		0.219979	-1.22658	10	2	2.06648	-3.66818		0.075883	-1.77509	18	13	1.61748	-1.08096		0.503943
CNAG_00843	0	0	3.68129	2.81922	0.999845	0.443782	0.765822	7	9	0.752513	3.93749	0.349169		0.929338	0.0886781	0	0	2.54389	3.8926		0.125972	1.53018	3	2	2.54055	2.69577		0.288645	1.0611	4	7	2.66467	1.68297		0.527657	0.631587	4	0	2.54982	2.17872		0.392849	0.854461	7	9	2.56065	1.64713		0.520064
CNAG_00844	0	1	2.72929	1.80881	0.999845	0.507498	0.662739	8	11	0.873545	2.87941	1.71156		0.552234	0.594416	3	0	1.3506	1.39021		0.303328	1.02932	4	0	1.26066	1.47518	0.673456	0.241936	1.17016	6	6	1.57131	-1.15348		0.462895	-0.734088	2	0	1.26999	0.873515		0.49157	0.687813	0	1	1.27911	0.295864	0.945348	0.817079
CNAG_00845	6	8	0.82178	0.245849	0.999845	0.764813	0.299166	57	45	10.1722	0.896408	0.383935	0.904954	0.66843	0.428304	7	7	2.85503	-0.859476		0.763384	-0.30104	16	2	2.50961	2.55957		0.307771	1.01991	18	22	2.69859	0.239214		0.929365	0.0886439	21	27	2.85503	-2.48666		0.383766	-0.870977	74	61	2.66655	-0.441673		0.868445
CNAG_00846	11	5	1.02283	-0.928496	0.999845	0.364	-0.90777	37	33	10.3124	1.11981	-0.918796	0.767658	0.411933	-0.820496	5	4	2.31948	-2.86949		0.21604	-1.23713	2	3	1.89722	0.150533		0.936759	0.079344	12	19	2.31948	-4.00222		0.0844406	-1.72548	20	16	1.87776	0.157604		0.93311	0.0839322	25	36	2.0831	-2.45533		0.238521
CNAG_00847	1	8	1.10094	0.38843	0.999845	0.724227	0.352816	25	29	4.4177	1.21045	0.461432	0.920475	0.70305	0.381207	6	2	0.60179	0.576562	0.545331	0.338023	0.958078	5	2	0.579634	0.468978	0.805368	0.418461	0.809093	5	10	0.595655	-0.320426	0.826499	0.590618	-0.53794	11	10	0.569327	1.18325	0.141404	0.0376792	2.07833	13	24	0.57302	0.278109	0.860658	0.627436
CNAG_00848	94	668	0.512901	0.526159	0.999845	0.304963	1.02585	2665	2072	274.747	0.521853	-0.877329	0.396927	0.0927283	-1.68118	205	58	0.628975	-0.708871	0.481029	0.259732	-1.12703	182	61	0.598434	0.0548832	0.983611	0.926927	0.0917114	1178	1001	0.621703	-1.55465	0.0997819	0.0123971	-2.50063	888	1122	0.608496	-1.32334	0.120037	0.0296478	-2.17476	3565	3125	0.60092	-1.05645	0.349177	0.0787383
CNAG_00849	3	2	1.30331	-0.00302209	0.999845	0.99815	-0.00231879	18	17	4.08735	1.3913	0.690032	0.888598	0.619922	0.495962	6	2	1.00388	-0.286879	0.874359	0.775055	-0.285769	14	5	0.697061	4.53848	1.9447e-09	7.47132e-11	6.51088	11	17	0.764147	0.929675	0.528804	0.22375	1.21662	12	12	0.744017	0.925621	0.438861	0.213468	1.24408	16	28	0.751762	0.314649	0.883477	0.675546
CNAG_00850	0	2	1.90693	2.00116	0.999845	0.293988	1.04941	16	20	1.72095	2.11056	1.06737		0.613048	0.505728	3	0	0.82317	-0.461219	0.737275	0.575277	-0.560297	2	0	0.763839	-0.986077	0.613737	0.196721	-1.29095	8	13	0.733314	-0.394817	0.826499	0.5903	-0.538401	5	14	0.715901	-0.513855	0.699268	0.472897	-0.717774	18	16	0.70154	-0.521885	0.78024	0.456929
CNAG_00851	1	25	1.01847	0.43564	0.999845	0.668841	0.427739	89	50	9.14132	1.09898	-0.173027	0.968419	0.874896	-0.157443	10	3	0.962296	-0.802951	0.602752	0.404049	-0.834411	3	4	0.670908	1.29524	0.309944	0.0535354	1.93058	46	38	0.691858	0.773825	0.57127	0.263365	1.11847	35	46	0.667297	1.02496	0.313502	0.12454	1.53599	124	88	0.661474	0.865162	0.53682	0.190897
CNAG_00852	8	19	0.634158	0.2797	0.999845	0.659172	0.441057	104	76	17.5025	0.674341	0.825739	0.592248	0.220759	1.22451	30	8	5.16743	-0.869528		0.86637	-0.168271	12	7	5.06573	0.361214		0.943155	0.0713053	38	42	5.16743	-2.00225		0.698405	-0.387475	50	50	5.13928	-0.856229		0.867681	-0.166605	109	85	5.16743	-2.90111		0.574509
CNAG_00853	6	18	0.764689	-0.191378	0.999845	0.80238	-0.250269	67	44	11.8526	0.835829	-0.00777149	0.997005	0.992581	-0.00929794	6	9	1.84874	-1.04566		0.571663	-0.565603	5	4	1.4453	-0.220845		0.878554	-0.152802	21	15	1.384	0.454124		0.742817	0.328125	25	33	1.37471	0.0696416		0.959597	0.0506593	65	64	1.30228	1.00775		0.439029
CNAG_00854	16	48	0.510093	-0.16844	0.999845	0.741237	-0.330215	131	169	25.9538	0.563058	-0.371535	0.83117	0.509349	-0.659852	20	14	0.760045	0.218171	0.874359	0.774074	0.287051	23	9	1.1249	-5.86614	3.34996e-06	1.84007e-07	-5.21481	67	82	0.770462	-1.63432	0.189121	0.0339033	-2.12122	69	82	0.908219	-4.88446	2.3299e-06	7.52918e-08	-5.37806	183	165	0.904639	-5.2538	1.04157e-07	6.33669e-09
CNAG_00855	11	22	0.76998	-0.164251	0.999845	0.831079	-0.213318	82	90	14.3909	0.830159	-0.313451	0.920729	0.705743	-0.377579	19	4	1.2753	-1.9125		0.133706	-1.49965	8	5	0.838914	0.0440731	0.989578	0.958102	0.0525359	40	30	1.06736	-2.11972		0.0470389	-1.98595	39	48	0.931663	-1.62889		0.0804008	-1.74837	93	87	0.837464	-0.73592	0.727585	0.379538
CNAG_00858	7	7	0.98538	-0.642424	0.999845	0.51443	-0.651956	28	33	9.35137	1.03684	0.361113	0.926002	0.727627	0.348284	5	9	6.76668	0.581073		0.931568	0.0858726	7	4	6.76668	-0.636661		0.92504	-0.0940876	13	13	6.76668	-0.551636		0.935027	-0.0815223	21	14	6.66052	2.08514		0.754235	0.31306	30	25	6.7578	-0.0796758		0.990593
CNAG_00859	8	57	0.737213	-3.85343	5.69875e-06	1.72256e-07	-5.22703	10	10	12.686	0.895319	-2.70643	0.0371983	0.00250393	-3.02287	4	2	0.757315	4.18928	1.70399e-05	3.17037e-08	5.53176	78	59	0.886586	-3.38979	0.0017344	0.000131615	-3.82342	3	5	0.95203	-3.95042	0.00142833	3.3325e-05	-4.14947	10	10	0.783517	-1.46201	0.197697	0.0620473	-1.86596	18	8	1.00209	-5.21919	2.78947e-06	1.90555e-07
CNAG_00860	6	12	0.847731	-1.25353	0.999845	0.139225	-1.47868	15	28	11.7202	0.876015	0.759646	0.748489	0.385854	0.867161	12	10	6.76668	0.581073		0.931568	0.0858726	6	3	6.76668	-0.636661		0.92504	-0.0940876	21	13	6.76668	-0.551636		0.935027	-0.0815223	18	9	6.76668	-1.04608		0.877142	-0.154593	25	25	6.68935	1.01135		0.879827
CNAG_00861	0	3	2.07322	0.793043	0.999845	0.702078	0.382518	9	12	1.34111	2.41825	-0.487015		0.840392	-0.201392	0	1	3.36868	-1.85297		0.58228	-0.550058	0	1	3.15918	-0.0790493		0.980037	-0.0250221	4	2	3.34306	-1.62055		0.627853	-0.484751	4	3	3.36868	-3.48015		0.301561	-1.03309	12	15	3.15088	-0.772501		0.806325
CNAG_00862	4	3	1.06883	0.927455	0.999845	0.385543	0.867728	32	58	7.34289	1.12576	1.26553	0.640666	0.260945	1.12416	14	3	3.80536	0.581082		0.878634	0.152701	4	1	3.80536	-0.636671		0.867127	-0.167309	24	9	3.5819	3.19608		0.37224	0.892286	25	15	3.57308	2.91896		0.413968	0.816931	34	21	3.58179	2.28591		0.523342
CNAG_00863	1	1	1.75937	0.554703	0.999845	0.752545	0.315286	9	9	1.76651	1.83731	1.79573		0.328385	0.977372	2	3	2.08994	-0.1857		0.929198	-0.0888541	9	1	1.93006	0.406216		0.833302	0.210468	5	1	2.00928	-0.650432		0.746154	-0.323714	5	6	2.30789	-2.97152		0.197903	-1.28755	6	6	1.98042	-1.22732		0.535439
CNAG_00864	0	1	2.97358	0.896266	0.999845	0.763102	0.30141	2	8	0.917553	3.03898	2.40091		0.429507	0.790036	5	0	1.1318	0.304782		0.787707	0.269289	2	1	1.41633	-2.64015	0.341894	0.0623106	-1.86408	7	4	1.21887	-1.55895		0.200892	-1.27901	4	1	1.30469	-2.55653		0.0500548	-1.9595	1	1	1.05921	-0.710197		0.502542
CNAG_00865	0	2	2.28588	0.460223	0.999845	0.840438	0.201333	4	8	1.039	2.58664	0.0101255		0.996877	0.00391455	0	1	3.05067	0.581084		0.848935	0.190477	1	0	2.77119	3.00681		0.277912	1.08502	4	5	2.82177	2.4095		0.393162	0.853898	2	0	3.02715	0.341044		0.910299	0.112661	3	0	2.7715	2.19757		0.427825
CNAG_00866	7	109	0.844881	0.706995	0.999845	0.402706	0.836798	380	351	36.1295	0.879852	-0.721289	0.767658	0.412339	-0.819785	36	6	1.67961	0.558177		0.739644	0.332325	19	15	1.40655	1.75963	0.639066	0.210925	1.25102	170	132	1.41235	1.73818		0.218436	1.2307	170	183	1.45488	0.584889		0.687671	0.402018	467	397	1.4055	0.971983	0.797049	0.489216
CNAG_00867	0	0	2.63904	2.52201	0.999845	0.339247	0.955654	5	8	1.0485	2.98102	0.34917		0.906756	0.117131	0	0	1.23368	-0.428179	0.846656	0.728536	-0.347073	7	1	1.17575	1.41817	0.657158	0.227747	1.20618	2	1	1.20163	-0.579774	0.852199	0.62946	-0.482488	2	0	1.45619	-4.34432	0.0195705	0.00285109	-2.98335	2	5	1.17797	0.26036	0.946482	0.825074
CNAG_00868	0	0	4.59335	-0.183746		0.968091	-0.0400027	1	1	0.434915	4.70538	0.349168		0.940846	0.0742061	0	0	6.76668	0.581073		0.931568	0.0858726	0	0	6.76668	-0.636661		0.92504	-0.0940876	4	3	6.76668	-0.551636		0.935027	-0.0815223	0	0	6.76668	-1.04608		0.877142	-0.154593	1	0	6.7578	-0.0796724		0.990593
CNAG_00869	7	44	0.628367	0.342067	0.999845	0.586184	0.544375	125	171	18.2831	0.68437	-0.170194	0.945682	0.803603	-0.248687	21	8	0.805501	-0.53227	0.682302	0.508745	-0.660793	17	13	0.748105	0.717695	0.755911	0.337382	0.959351	96	65	0.763935	-0.333618	0.864791	0.662322	-0.43671	107	72	0.772236	-1.21117	0.301223	0.116788	-1.5684	175	181	0.74343	0.556674	0.778934	0.453983
CNAG_00870	9	48	0.719911	-1.44443	0.62164	0.0448131	-2.0064	49	49	25.2084	0.725279	1.1563	0.428627	0.110873	1.59428	28	40	0.734224	0.784686	0.505116	0.285192	1.06873	55	29	0.774382	-6.53322	8.29532e-15	3.26452e-17	-8.43669	31	17	0.734497	-0.87819	0.537839	0.231839	-1.19563	38	30	0.74299	-4.77731	3.43037e-08	1.27731e-10	-6.42985	65	37	0.758438	-6.60479	1.50243e-16	3.08163e-18
CNAG_00871	2	5	1.24161	-0.988023	0.999845	0.426172	-0.795759	6	13	2.838	1.33399	0.338413		0.799739	0.253685	3	3	1.43235	2.08158		0.146151	1.45326	2	1	1.68616	-1.21898	0.83605	0.469722	-0.722931	9	7	1.45127	0.655974		0.651268	0.452001	4	9	1.91906	-2.60275		0.175017	-1.35626	13	8	1.42792	0.115487		0.935539
CNAG_00872	21	37	0.710877	-0.401243	0.999845	0.572459	-0.564434	147	123	41.4452	0.759927	-0.749348	0.702961	0.324094	-0.986079	20	9	0.542694	-0.67873	0.427718	0.211056	-1.25067	19	5	0.523303	-0.0244353	0.990963	0.962757	-0.0466944	52	59	0.522032	0.366185	0.751604	0.483015	0.701461	54	67	0.518777	0.983647	0.189925	0.0579483	1.89609	100	106	0.519229	0.358691	0.797049	0.489681
CNAG_00873	20	103	0.458889	0.122085	0.999845	0.790204	0.266045	354	279	46.3229	0.48496	0.067386	0.971428	0.889488	0.138952	66	21	0.719693	-1.42434	0.194482	0.0478058	-1.97909	60	20	0.639805	-0.484692	0.825721	0.448713	-0.757562	138	139	0.649493	-0.865528	0.477912	0.182656	-1.33262	139	188	0.648903	-1.3428	0.143661	0.0385147	-2.06933	393	350	0.625963	-0.106221	0.959355	0.865252
CNAG_00874	5	36	0.665189	0.229017	0.999845	0.730629	0.344289	132	86	16.4754	0.741476	-0.383647	0.881449	0.60487	-0.51741	15	5	1.75913	0.246167		0.88871	0.139937	8	4	1.8641	-1.63698		0.379856	-0.878162	54	42	2.07849	-2.60199		0.210618	-1.25187	63	89	1.71887	-1.03908		0.545502	-0.604514	154	161	1.8641	-2.45143		0.188485
CNAG_00875	3	10	0.925831	-0.132134	0.999845	0.886511	-0.14272	30	31	5.27641	1.19052	-1.31001	0.65159	0.27117	-1.10037	4	0	3.68399	1.84797		0.615933	0.501622	9	1	3.84262	-2.0765		0.588931	-0.540386	17	12	3.84262	-1.99147		0.604278	-0.518259	18	27	3.7288	-0.257224		0.945003	-0.0689832	56	32	3.80913	-1.30345		0.732208
CNAG_00876	21	65	0.511291	-0.398746	0.999845	0.435461	-0.77988	132	210	33.7655	0.558716	-0.619044	0.649273	0.267872	-1.10798	27	13	3.10051	-1.08492		0.726402	-0.349916	24	9	2.83801	0.456199		0.872294	0.160746	57	48	3.13184	-3.5763		0.253488	-1.14192	34	87	3.13184	-4.07076		0.19367	-1.2998	191	129	2.87902	-1.1274		0.69536
CNAG_00877	5	20	0.645318	0.290214	0.999845	0.652911	0.449722	86	67	10.7658	0.774858	-0.605908	0.782138	0.434238	-0.78196	7	4	2.33354	-1.86161		0.425009	-0.797761	9	7	2.11194	-0.71154		0.736183	-0.336912	36	31	1.96104	0.575613		0.769121	0.293525	40	42	1.90909	0.859559		0.652533	0.450246	82	74	1.88709	0.965383		0.608951
CNAG_00878	0	4	1.51856	0.247112	0.999845	0.870733	0.162727	5	15	2.88652	1.6007	1.45658		0.362842	0.909964	6	1	1.6042	1.49197		0.35235	0.93004	2	2	1.56807	0.612225		0.696216	0.390433	4	5	1.59378	0.450615		0.777381	0.282734	8	5	1.60106	-0.107052		0.946691	-0.0668633	15	15	1.50995	0.55945		0.711003
CNAG_00879	45	190	0.526072	0.180068	0.999845	0.732135	0.342287	702	601	88.2759	0.548101	-0.759901	0.517482	0.165617	-1.38643	88	16	1.09116	0.328734		0.763208	0.301271	52	11	1.02212	-0.238468	0.956309	0.815524	-0.233306	315	261	1.01666	-0.0931092		0.927029	-0.0915838	311	400	0.969774	0.0846424		0.930449	0.0872805	793	892	0.98452	-0.562463	0.832231	0.567792
CNAG_00883	4	16	0.727729	1.21414	0.999845	0.0952382	1.66839	94	137	11.7644	0.802904	0.423672	0.877526	0.597725	0.527675	9	8	1.69266	-2.2675		0.180375	-1.3396	9	5	1.30554	-1.84587	0.562689	0.157399	-1.41387	117	42	1.70005	-3.39425		0.0458736	-1.99655	28	31	1.11663	-0.6614		0.553638	-0.592318	60	54	1.06128	0.0224346	0.99709	0.983135
CNAG_00884	2	27	0.792446	1.5636	0.656926	0.0484808	1.97313	143	218	21.2169	0.838044	0.788911	0.720201	0.346514	0.941372	20	9	1.56296	-1.36301		0.383172	-0.872067	3	10	1.21725	0.180489		0.882125	0.148276	100	85	1.55967	-2.47849		0.112036	-1.58911	58	47	1.32452	-1.61519		0.222671	-1.21946	159	113	1.31184	-1.90554		0.146345
CNAG_00885	1	0	3.29498	-1.58568	0.999845	0.630346	-0.481239	0	3	0.841408	3.30844	1.28225		0.698335	0.387569	2	1	1.53586	1.86246		0.225263	1.21265	0	4	1.56961	0.326674	0.961559	0.835131	0.208125	0	0	1.54911	0.595978		0.700443	0.384723	2	0	1.49135	0.785311		0.598487	0.526577	0	1	1.47361	0.667993		0.650331
CNAG_00886	51	237	0.437543	0.186769	0.999845	0.669482	0.426859	724	841	110.266	0.457404	-0.620759	0.53103	0.174738	-1.35714	105	27	0.919058	0.31029		0.735652	0.337617	70	21	1.01491	-1.76624	0.404799	0.0818081	-1.74029	417	322	1.02587	-1.76793		0.0848263	-1.72334	502	489	0.961073	-1.74858		0.0688496	-1.81941	794	806	0.87477	-1.09825	0.561108	0.209306
CNAG_00887	0	0	2.18584	0.8161	0.999845	0.708882	0.373358	2	2	1.72004	2.45729	1.70355		0.488143	0.693265	1	0	1.33329	-2.50894	0.21731	0.0598687	-1.88176	3	1	1.11892	0.442669	0.938207	0.692383	0.395623	1	0	1.11355	1.2596	0.56579	0.257988	1.13116	2	0	1.10854	2.01497	0.21162	0.0691147	1.81767	1	3	1.11124	0.797463	0.791242	0.472985
CNAG_00888	13	24	0.756289	-0.365801	0.999845	0.628614	-0.483678	88	84	15.7021	0.802737	-0.145794	0.959384	0.85588	-0.181621	25	5	1.50432	2.3628		0.116257	1.57068	9	3	1.73193	-0.642695	0.9418	0.710574	-0.371085	27	66	1.64863	-0.109032		0.947271	-0.0661346	51	107	1.56767	0.0109754		0.994414	0.0070011	211	176	1.44934	1.43441		0.322323
CNAG_00889	0	2	2.09753	2.30878	0.999845	0.271023	1.10071	24	20	2.30037	2.21365	1.79915		0.416361	0.81275	0	3	1.96118	-0.460036		0.814541	-0.234572	7	4	1.42885	3.87338	0.0645426	0.00671144	2.71083	10	2	1.59533	0.370595		0.816305	0.2323	4	0	2.01916	-3.48538		0.0843201	-1.72615	2	3	1.50691	0.478062	0.922578	0.751056
CNAG_00890	8	11	0.902622	-0.300845	0.999845	0.738907	-0.333301	47	51	13.769	0.944918	0.500998	0.877482	0.595971	0.530203	6	13	0.566807	0.337596	0.716173	0.551435	0.595611	4	1	0.51892	0.414788	0.809197	0.4241	0.799329	18	20	0.59916	-1.31604	0.168448	0.0280581	-2.19647	27	34	0.526273	-0.269663	0.795917	0.60837	-0.512402	38	55	0.505647	0.295153	0.827666	0.559414
CNAG_00891	40	143	0.416257	0.189759	0.999845	0.648483	0.455871	542	522	75.3271	0.446796	-0.643956	0.496174	0.149507	-1.44127	69	18	1.21737	-0.470767		0.698972	-0.386709	53	18	0.931487	1.26115	0.594663	0.175764	1.35391	293	222	1.10608	-0.935216		0.397819	-0.845524	278	328	0.984102	-0.205528	0.930185	0.834567	-0.208848	634	750	0.918601	0.880314	0.692782	0.337901
CNAG_00892	3	4	1.62428	-0.698612	0.999845	0.667119	-0.430105	15	13	1.98684	2.0565	-2.42892		0.237565	-1.18109	0	1	6.76668	0.581073		0.931568	0.0858726	2	1	6.76154	0.763356		0.910112	0.112897	3	3	6.73956	1.17446		0.861659	0.174263	4	5	6.76668	-1.04608		0.877142	-0.154593	13	21	6.70424	0.758013		0.909979
CNAG_00893	1	31	0.848947	0.551755	0.999845	0.515738	0.649929	92	93	18.0867	0.871163	1.4603	0.398231	0.0936855	1.67627	23	20	1.67283	1.0032		0.548705	0.599702	23	5	1.75158	-0.639165		0.71518	-0.364908	48	41	1.59615	0.447353		0.77927	0.28027	54	59	1.47313	1.83292		0.213414	1.24423	102	105	1.47579	1.34957		0.360467
CNAG_00894	28	72	0.5033	-0.254812	0.999845	0.612659	-0.506282	277	187	54.9406	0.537291	-0.380245	0.812083	0.479127	-0.707708	28	25	1.77893	-3.18449		0.073435	-1.79012	20	8	1.17592	-0.162572	0.977191	0.890042	-0.138251	107	114	1.33949	-1.33866		0.317611	-0.99938	187	216	1.22182	-1.02625		0.400943	-0.839938	337	400	1.12719	-0.293671		0.794453
CNAG_00895	18	21	0.920373	-0.884671	0.999845	0.336447	-0.96121	92	55	17.8484	0.987998	-1.19678	0.599237	0.225774	-1.21132	6	8	1.66689	-4.03334		0.0155343	-2.41968	7	4	0.880212	0.940218	0.720642	0.285443	1.06817	27	34	0.906078	0.3595		0.691541	0.396765	38	58	0.998946	-1.42988	0.355325	0.152318	-1.43139	92	83	0.893553	-0.252668	0.930363	0.777355
CNAG_00896	1	5	1.27507	0.526892	0.999845	0.679442	0.413225	23	19	3.63508	1.3778	0.830848	0.85117	0.546492	0.603025	2	4	1.34427	1.14998		0.392295	0.855463	3	4	1.27146	0.701079	0.901122	0.581362	0.551397	12	9	1.32908	0.152622		0.908577	0.114833	15	5	1.22536	1.08208		0.377197	0.883072	16	21	1.2221	0.751333	0.816509	0.538694
CNAG_00897	28	34	0.73019	-1.29305	0.895243	0.0765863	-1.77085	107	67	26.9385	0.763658	-0.628024	0.767658	0.410856	-0.822389	20	15	0.937828	0.689138		0.462447	0.734824	20	7	0.820104	1.53734	0.337416	0.0608516	1.87457	51	43	0.901315	-0.0280383	0.987431	0.975183	-0.0311082	100	75	0.839775	0.549746	0.724938	0.512703	0.654634	156	188	0.827496	0.483037	0.827666	0.559399
CNAG_00898	0	0	2.80812	1.14243	0.999845	0.684133	0.40683	2	3	0.874212	2.82683	3.85749		0.17238	1.3646	2	2	2.00891	-1.86159		0.354101	-0.926665	2	0	1.73971	-0.682588	0.938238	0.694795	-0.392357	4	2	1.73062	-0.566414		0.743449	-0.32729	4	5	1.57312	-0.0476405		0.97584	-0.0302841	7	1	1.43017	2.07882	0.479104	0.146071
CNAG_00899	8	40	0.575007	-0.104315	0.999845	0.856042	-0.181415	107	107	17.0069	0.634083	-0.166559	0.942415	0.792799	-0.262677	22	7	1.36599	-0.565981		0.678628	-0.414336	8	3	1.2034	-0.613406	0.910586	0.610243	-0.509726	41	30	1.78565	-4.58118		0.0103011	-2.56556	63	68	1.22006	-1.18468		0.331548	-0.971002	109	128	1.11327	-0.0501382	0.995216	0.964078
CNAG_00900	1	2	1.52691	-0.231152	0.999845	0.879671	-0.151386	5	9	2.26185	1.6315	1.0715		0.511336	0.656758	4	1	1.9297	-2.27412		0.238603	-1.17848	2	2	1.61123	-1.92871		0.231289	-1.19704	8	9	1.73543	-2.50057		0.149616	-1.44089	7	4	1.7046	-2.85123		0.0943939	-1.67266	15	13	1.48724	-1.65909		0.264617
CNAG_00901	2	17	0.849749	0.862824	0.999845	0.309922	1.01539	97	59	10.2405	0.895802	1.07895	0.601987	0.228416	1.20445	13	10	1.25996	2.76844		0.0280036	2.19724	12	6	1.23729	1.97219	0.475075	0.110944	1.59396	40	33	1.22936	2.23384		0.0692057	1.81707	44	48	1.21256	2.19948	0.212991	0.0696917	1.81391	74	99	1.20651	2.00159	0.389624	0.0971183
CNAG_00902	0	8	1.37221	0.817906	0.999845	0.551141	0.596051	29	27	4.71661	1.43882	1.25089	0.747477	0.384636	0.869387	4	5	0.615381	-0.220158	0.840243	0.720523	-0.357759	8	1	0.540979	-0.0184307	0.993417	0.972822	-0.0340691	9	11	0.527307	0.552516	0.607393	0.294727	1.04781	12	14	0.508076	1.14808	0.102482	0.0238421	2.25966	20	32	0.511573	0.475711	0.704785	0.352424
CNAG_00903	1648	13540	0.900577	-6.38924	1.35388e-10	1.2972e-12	-7.09461	665	97	8984.23	0.899084	1.83956	0.25557	0.0407531	2.04603	12296	13970	0.862384	0.815733	0.550577	0.344197	0.945905	12723	7309	0.862584	-7.34541	5.22045e-15	1.65755e-17	-8.51558	77	132	0.862386	-1.61948	0.268813	0.0603947	-1.8779	4541	3716	0.862405	-4.58932	2.88977e-06	1.02894e-07	-5.32154	1595	263	0.862594	-8.21326	5.45131e-19	1.70561e-21
CNAG_00904	6	39	0.620457	0.430252	0.999845	0.488031	0.693444	124	154	15.2662	0.706218	-0.60213	0.753984	0.393875	-0.852611	14	5	1.00324	0.444626		0.657627	0.443192	13	7	1.1216	-1.68416	0.521492	0.133209	-1.50157	52	56	0.92295	0.457681	0.847145	0.619972	0.49589	95	51	0.92295	-0.0407282	0.986971	0.964802	-0.0441283	115	107	0.894062	0.304193	0.912958	0.733678
CNAG_00905	0	9	0.995256	1.54018	0.999845	0.121738	1.54752	49	62	8.40879	1.05609	1.61416	0.453156	0.126406	1.52843	11	5	2.19128	1.75431		0.423369	0.80059	5	4	2.13524	0.977443		0.64712	0.457767	30	18	2.19412	0.602077		0.783774	0.274404	50	13	2.19883	0.0760607		0.972406	0.0345914	42	38	2.01857	1.97012		0.329065
CNAG_00906	28	116	0.358682	0.0866148	0.999845	0.809183	0.24148	385	371	67.7467	0.394041	-0.324262	0.767658	0.410557	-0.822913	49	27	0.874198	-0.295456	0.851216	0.735383	-0.337974	46	17	0.860091	1.11556	0.611826	0.194622	1.29703	201	153	0.875116	-1.51474	0.327765	0.0834694	-1.7309	253	211	0.871094	-1.64486	0.192467	0.0589898	-1.88827	418	403	0.863056	-0.764751	0.723255	0.375566
CNAG_00907	4	3	1.16452	-1.2073	0.999845	0.29986	-1.03673	11	10	3.78523	1.25062	0.160153	0.972496	0.898102	0.128059	4	3	1.81394	-3.18458		0.0791547	-1.75561	6	2	1.15366	1.1379	0.75471	0.323967	0.986339	4	5	1.47836	-1.79884		0.223688	-1.21678	6	2	1.4999	-2.37975		0.112603	-1.5866	7	5	1.18684	-0.383745		0.746442
CNAG_00908	4	65	0.733158	0.110866	0.999845	0.879804	0.151217	147	149	46.154	0.752468	0.813236	0.66135	0.279804	1.08076	37	25	1.07255	-0.297862	0.874359	0.781231	-0.277715	30	20	0.907897	-0.138055	0.97317	0.87914	-0.15206	70	71	0.819543	1.83917	0.156228	0.024823	2.24415	86	68	0.902083	-0.475013	0.791729	0.59849	-0.526573	83	54	0.805244	1.68656	0.216959	0.0362184
CNAG_00909	4	12	0.823381	0.0525704	0.999845	0.949092	0.063847	46	41	14.6016	0.861798	1.18539	0.521203	0.168981	1.37548	13	11	0.773848	-0.275382	0.841132	0.721945	-0.35586	9	4	0.657809	-0.0438646	0.989042	0.946834	-0.066683	13	21	0.657145	0.0532898	0.97368	0.935368	0.081093	34	28	0.64049	-0.0766059	0.957678	0.904796	-0.119605	13	14	0.611159	0.477936	0.770557	0.434205
CNAG_00911	0	2	3.10374	-0.762789	0.999845	0.805865	-0.245764	3	2	0.772245	3.1651	1.33538		0.673092	0.421908	0	2	1.59451	1.39932		0.380168	0.877588	1	0	1.51541	0.972977	0.869347	0.520837	0.642055	2	1	1.52788	0.908198		0.552232	0.594418	0	1	1.48868	0.957172		0.520246	0.642967	2	0	1.48627	0.592722	0.888836	0.690041
CNAG_00914	42	124	0.450619	-0.291336	0.999845	0.51794	-0.646523	384	342	66.1219	0.478074	-0.569426	0.609517	0.233621	-1.19108	59	24	1.16139	-1.21389		0.29593	-1.0452	49	33	0.866069	0.293291	0.94877	0.734876	0.338646	155	147	0.979402	-1.17513		0.230199	-1.19985	202	246	0.977144	-1.64658		0.091971	-1.68509	438	476	0.852498	-0.16692	0.952136	0.844766
CNAG_00915	3	15	0.772208	-0.105456	0.999845	0.891375	-0.136564	41	40	10.7172	0.808684	1.21469	0.465157	0.133083	1.50205	15	11	0.854203	0.695091	0.610376	0.415799	0.81373	15	7	0.796952	0.22383	0.950181	0.778819	0.280858	23	28	0.791939	0.389079	0.849178	0.623215	0.491299	26	14	0.746821	0.941163	0.430713	0.207588	1.26022	30	34	0.742864	0.671981	0.714606	0.365688
CNAG_00916	8	20	0.678061	-0.0198368	0.999845	0.976661	-0.0292552	86	65	14.8457	0.726906	0.414652	0.863873	0.568383	0.570434	12	13	1.80899	-1.04068		0.565101	-0.575281	13	3	1.251	1.68526	0.59623	0.177938	1.34713	42	61	1.33651	0.39609		0.766954	0.296361	52	46	1.29323	0.453103		0.726064	0.350367	140	106	1.2531	0.824175	0.800373	0.510724
CNAG_00917	1	23	0.86798	0.521547	0.999845	0.547924	0.600875	74	67	10.5706	0.962283	-0.145099	0.969257	0.880144	-0.150786	8	4	1.33803	-0.473151		0.723626	-0.353617	7	1	1.08257	1.22413	0.690642	0.258153	1.13077	25	26	1.32354	-1.52149		0.250325	-1.14956	45	40	1.17368	-0.838329		0.475058	-0.714273	88	82	1.09962	-0.0564038	0.994889	0.959091
CNAG_00919	7	23	0.547109	0.572828	0.999845	0.295095	1.04701	129	101	20.5369	0.583111	1.12634	0.299058	0.053409	1.9316	29	16	1.9509	-1.86427		0.339277	-0.955594	20	7	1.34372	3.04964	0.176662	0.0232347	2.26955	84	87	1.50631	0.372101		0.804886	0.247029	41	23	1.50464	-0.105714		0.943988	-0.0702587	62	72	1.38272	1.02733	0.78024	0.457495
CNAG_00920	4	18	0.74923	0.511348	0.999845	0.494924	0.682498	60	93	9.61466	0.840397	-0.0462717	0.990188	0.956091	-0.0550594	12	3	0.674411	1.70645	0.0982547	0.0113973	2.53028	19	5	0.659641	0.860784	0.610279	0.191917	1.30493	44	38	0.660653	0.921401	0.449266	0.163112	1.39468	46	32	0.642201	1.05516	0.272986	0.100376	1.64303	71	55	0.636208	0.925494	0.478326	0.145751
CNAG_00921	2	10	0.883619	0.852515	0.999845	0.334646	0.964799	46	59	7.71432	0.984676	0.442156	0.898187	0.653405	0.449037	8	3	0.609825	1.18646	0.20154	0.0517059	1.94557	4	4	0.611298	-0.0725255	0.982169	0.905559	-0.118642	23	17	0.607823	0.10246	0.943069	0.866135	0.168569	31	28	0.576219	0.721875	0.435043	0.210286	1.25278	90	62	0.59328	-0.380569	0.806589	0.52122
CNAG_00922	2	10	1.08878	-0.0660279	0.999845	0.951643	-0.0606442	25	30	4.71469	1.27048	-0.717461	0.865676	0.572268	-0.564714	4	1	1.36624	-1.44787		0.289258	-1.05975	4	0	0.991833	0.0852544	0.986008	0.931501	0.0859564	17	18	1.11112	-1.21137		0.275613	-1.09023	24	12	1.03199	-0.923555		0.370828	-0.894923	39	37	1.08712	-1.90639	0.350886	0.0794973
CNAG_00923	4	10	0.753535	0.589999	0.999845	0.433642	0.782974	62	51	8.00137	0.905322	-0.32471	0.922992	0.719843	-0.358668	5	3	1.35753	0.420167		0.756934	0.30951	4	1	1.17789	1.45028	0.647792	0.218227	1.23126	23	28	1.18853	1.27926		0.281779	1.07633	27	21	1.24663	-0.195632		0.875301	-0.156929	68	61	1.18875	0.368231	0.924088	0.756741
CNAG_00924	0	0						0	0	0						0	0	1.99205	0.10592		0.957596	0.0531712	0	0	1.93289	-0.574708		0.766213	-0.297331	1	0	1.93755	-0.526964		0.785641	-0.271975	0	0	2.30545	-4.48097		0.0519385	-1.94364	0	0	1.94622	-1.52419		0.433536
CNAG_00925	0	4	1.24213	1.1271	0.999845	0.364197	0.907397	17	22	6.3185	1.26889	2.97822	0.160708	0.0189201	2.3471	8	9	0.855936	-0.948963		0.267566	-1.10868	4	3	0.669396	-0.0203354	0.994393	0.975765	-0.0303788	13	7	0.725795	-0.888224	0.525411	0.221029	-1.2238	13	8	0.731061	-1.44691	0.165943	0.0477942	-1.97919	5	14	0.697231	-1.36946	0.267218	0.049514
CNAG_00926	1	5	1.03798	1.54554	0.999845	0.13649	1.48899	45	41	5.32599	1.15142	1.03592	0.73705	0.368285	0.89969	8	1	0.962187	-0.355299	0.835543	0.711933	-0.369261	8	3	0.845942	0.704383	0.796715	0.405036	0.832661	28	16	0.86953	0.0053157	0.998445	0.995122	0.00611331	38	36	0.87981	-0.746716	0.634539	0.396035	-0.848724	53	66	0.840892	0.144251	0.95899	0.863795
CNAG_00927	0	5	1.08631	1.41333	0.999845	0.193245	1.30104	34	26	5.60203	1.15446	1.98122	0.382104	0.0861352	1.71615	8	4	0.969667	0.150144		0.876947	0.154841	5	4	0.971576	-1.06848	0.709767	0.271444	-1.09974	8	18	0.873846	0.0608107		0.94452	0.0695897	15	11	0.865016	-0.295996	0.875891	0.732211	-0.342185	29	25	0.83947	-0.220877	0.933965	0.792462
CNAG_00928	11	27	0.662494	-0.646183	0.999845	0.329372	-0.97538	64	70	15.76	0.761787	-1.00223	0.546985	0.188297	-1.31563	12	3	1.13842	0.489672		0.667098	0.430134	3	2	0.994623	1.02153	0.7386	0.304398	1.02705	37	26	1.05619	0.134156		0.898925	0.12702	38	35	1.00066	0.489448	0.800926	0.624753	0.489125	81	81	0.974034	0.743356	0.776076	0.445361
CNAG_00929	3	45	0.710466	0.356659	0.999845	0.615662	0.502007	142	111	23.4677	0.730892	1.20733	0.408299	0.0985627	1.65186	40	21	0.795221	-2.18763	0.0683056	0.00594199	-2.75097	36	12	0.503712	-0.00999023	0.996393	0.984176	-0.0198332	55	61	0.498747	0.273696	0.822213	0.583165	0.548767	98	72	0.478023	0.979368	0.148298	0.0404825	2.04879	111	119	0.479227	0.470295	0.685351	0.326414
CNAG_00930	888	2062	0.622715	0.488817	0.999845	0.432467	0.784977	10975	13064	2201.58	0.62318	0.613939	0.702961	0.32454	0.985172	2189	1262	1.72054	0.101598		0.952912	0.0590502	1154	564	1.82228	-1.70153		0.350438	-0.933739	6499	5410	1.73785	-1.14752		0.509052	-0.660315	7607	8678	1.58184	-0.0841388		0.95758	-0.0531903	9920	14394	1.62469	-1.0879		0.503111
CNAG_00931	1	4	1.08918	-0.0029968	0.999845	0.997805	-0.00275142	11	14	4.13402	1.14213	1.7175	0.464589	0.13264	1.50377	7	4	2.29114	-1.8616		0.416493	-0.812521	6	5	1.86612	1.09396		0.557727	0.586221	6	5	1.9914	-0.162594		0.934926	-0.0816482	9	15	1.85415	0.915158		0.621608	0.493573	27	21	1.91299	-0.360577		0.850494
CNAG_00932	5	26	0.858274	-0.173696	0.999845	0.839621	-0.202378	71	59	10.1221	0.950357	-0.68164	0.809624	0.473222	-0.717246	10	3	2.47581	1.59182		0.520258	0.642948	7	3	2.3259	2.06731		0.3741	0.88882	48	29	2.67774	-1.99245		0.456828	-0.74408	41	37	2.41085	0.489117		0.839228	0.202882	114	97	2.33149	1.14964		0.621947
CNAG_00933	2	4	1.17109	0.10541	0.999845	0.928279	0.0900107	19	17	3.56235	1.2886	0.511283	0.914197	0.691533	0.396775	3	3	3.80451	0.581082		0.878607	0.152735	3	2	3.60984	2.51754		0.485546	0.69741	3	6	3.80451	-0.551644		0.884713	-0.144997	10	10	3.76907	0.547285		0.88455	0.145204	24	18	3.55867	2.95165		0.406864
CNAG_00934	5	35	0.804709	-0.497339	0.999845	0.536551	-0.618036	67	60	13.63	0.861711	-0.243737	0.939049	0.77729	-0.282852	15	6	1.11994	0.183382		0.869934	0.163743	4	1	1.01296	0.249089	0.955346	0.805759	0.245901	31	26	1.09563	-0.729994		0.505236	-0.666274	44	52	1.06676	-0.923441		0.386681	-0.865652	99	79	0.979928	0.203176	0.948707	0.835746
CNAG_00935	55	188	0.415054	0.154156	0.999845	0.710331	0.371412	690	704	100.859	0.437088	-0.57557	0.546985	0.187896	-1.31683	88	31	0.96312	0.61626	0.694908	0.522265	0.639858	62	18	0.858043	1.44694	0.432387	0.0917334	1.68632	437	365	0.959295	-0.472316	0.848841	0.622467	-0.492357	367	404	1.0186	-1.53353	0.326633	0.132189	-1.50553	928	891	0.865079	0.379801	0.875521	0.660635
CNAG_00936	5	11	0.995547	0.0581799	0.999845	0.953398	0.0584402	38	56	8.25047	1.07823	-0.0635441	0.989641	0.953005	-0.0589339	6	5	1.72101	-2.04703		0.234268	-1.18944	2	4	1.28719	-1.28489	0.752602	0.318174	-0.998217	76	46	1.20882	-0.551619		0.648154	-0.456328	71	44	1.15258	-0.344848		0.764789	-0.299198	71	42	1.10129	0.376853	0.91219	0.732205
CNAG_00937	1	1	2.54197	-1.16533	0.999845	0.64664	-0.458435	2	4	0.735063	2.78172	-0.570641		0.837463	-0.20514	0	1	1.74674	-1.46074		0.403005	-0.836266	1	1	1.1749	0.932655	0.812186	0.427303	0.793815	1	1	1.2406	0.0861464		0.94464	0.0694395	1	1	1.25	-0.507032		0.685017	-0.405627	0	0	1.22732	-0.662859		0.589137
CNAG_00938	3	12	0.839127	0.00241986	0.999845	0.997699	0.00288379	36	39	5.87943	1.00538	-0.628058	0.844187	0.53217	-0.624697	6	1	1.83321	-4.02904		0.0279627	-2.19781	3	4	1.22693	-0.598682		0.625586	-0.487949	34	20	1.52314	-2.73162		0.0729082	-1.7934	20	13	1.3121	-1.97714		0.131848	-1.50686	47	56	1.28492	-2.12915		0.0975141
CNAG_00939	0	1	2.46581	0.143665	0.999845	0.953539	0.0582626	2	4	0.846641	2.524	2.29064		0.36412	0.907542	1	2	1.0673	0.0514462		0.961555	0.0482022	0	0	0.894487	1.17922	0.603797	0.187396	1.31832	1	2	0.99817	-0.477166		0.632621	-0.478041	0	1	0.929696	-0.0452527	0.985724	0.961179	-0.0486747	2	0	0.902222	0.15027	0.959355	0.86772
CNAG_00940	13	48	0.593995	0.0496939	0.999845	0.933326	0.0836604	151	168	23.2773	0.647297	-0.419504	0.834838	0.516929	-0.648086	28	6	1.76861	-4.56022		0.00992523	-2.57842	15	8	1.0517	0.799517	0.824396	0.447128	0.760212	83	57	1.70907	-4.28748		0.0121188	-2.50867	89	119	1.09329	-0.925545	0.635726	0.397236	-0.846567	187	235	1.05262	-0.0499368	0.994948	0.962162
CNAG_00941	2	1	1.62838	-0.984448	0.999845	0.545473	-0.604558	5	6	1.73588	2.05894	-1.55444		0.450267	-0.75497	1	0	1.89906	-0.489194		0.796717	-0.257599	1	2	1.99287	-2.30212		0.248017	-1.15518	5	1	1.97829	-2.13579		0.280313	-1.07962	2	4	2.1757	-3.57584		0.100272	-1.64354	5	0	2.19304	-4.07963		0.0628483
CNAG_00960	13	68	0.499296	0.270542	0.999845	0.587924	0.541847	196	265	31.818	0.540686	-0.117534	0.951904	0.827912	-0.21738	30	17	1.46598	-0.80737		0.581813	-0.550739	23	6	1.24285	0.168772	0.977824	0.891984	0.135794	102	63	1.3315	-0.967761		0.467335	-0.726822	112	117	1.37626	-1.85009		0.178857	-1.34428	260	274	1.36819	-2.19127	0.411589	0.109247
CNAG_00961	6	92	0.691546	0.593454	0.999845	0.390807	0.858155	301	283	33.9355	0.727095	-0.292751	0.912803	0.687219	-0.402632	27	15	1.82471	-0.0426057		0.981372	-0.0233493	48	19	1.65601	0.608024		0.713498	0.367162	185	126	1.76842	-0.755829		0.669086	-0.427403	173	158	1.81484	-1.60627		0.376116	-0.885076	403	369	1.70546	-1.0091		0.554062
CNAG_00964	3	5	1.43784	-0.351623	0.999845	0.806806	-0.244549	16	22	6.40783	1.46861	1.29436	0.743637	0.378128	0.881352	2	10	0.983541	3.99235	0.00415248	4.92492e-05	4.05916	9	3	0.988592	2.5611	0.0868209	0.00957938	2.59065	16	10	1.01071	1.97832	0.239568	0.0503049	1.95736	17	15	0.977927	2.62636	0.0422069	0.00723911	2.68564	19	16	0.971527	2.59721	0.0634463	0.00751033
CNAG_00966	5	26	0.613095	0.159354	0.999845	0.794927	0.259918	74	92	14.7584	0.683809	0.0904837	0.971516	0.894729	0.132323	13	8	2.19261	0.227781		0.91726	0.103886	4	10	2.43168	-2.24997		0.354824	-0.925272	22	26	2.12996	-0.380858		0.858087	-0.17881	23	46	2.0902	-0.425699		0.838616	-0.203664	76	73	2.08377	-0.743253		0.721327
CNAG_00967	1	15	0.866318	0.957291	0.999845	0.269155	1.10501	69	66	7.55578	1.07862	-0.884668	0.767658	0.41211	-0.820186	3	2	2.17902	1.95335		0.37002	0.896436	16	3	2.11271	1.36335		0.518729	0.645306	21	21	2.41428	-0.603532		0.8026	-0.249984	45	35	2.11271	0.958702		0.649989	0.453778	76	77	2.11972	0.473029		0.823414
CNAG_00968	6	5	1.0685	-0.717029	0.999845	0.502182	-0.67106	17	30	5.78888	1.1851	-0.520944	0.902171	0.660244	-0.439576	4	3	1.08896	0.426781		0.695121	0.391916	2	2	1.00736	0.0736912	0.988136	0.941685	0.0731526	12	12	1.0589	-0.433973		0.681927	-0.409836	13	9	0.979056	0.111921		0.908988	0.114315	37	34	0.955263	0.213925	0.946482	0.822801
CNAG_00969	0	5	1.39353	0.603091	0.999845	0.665174	0.432781	17	15	3.49192	1.42847	2.30593	0.423104	0.106469	1.61427	7	6	1.09482	-0.885846	0.610831	0.418443	-0.809126	6	0	0.768986	0.816351	0.725132	0.28842	1.06159	9	1	0.769392	0.895162	0.551165	0.24464	1.16347	10	3	0.728544	1.88104	0.0536457	0.00982527	2.58192	11	14	0.734591	1.14424	0.42969	0.119315
CNAG_00970	33	123	0.389755	0.197397	0.999845	0.61253	0.506465	461	442	57.6692	0.436295	-0.94746	0.211275	0.0298854	-2.17161	39	17	1.68022	-4.44433		0.00816693	-2.64509	38	16	0.934328	-0.229027	0.95544	0.80636	-0.245125	213	184	1.21748	-2.66025		0.0288851	-2.18505	236	254	0.94144	-0.773016		0.41159	-0.8211	519	553	0.892503	0.228788	0.934449	0.797685
CNAG_00971	1	18	1.29132	-0.6873	0.999845	0.594556	-0.532245	25	22	5.98539	1.38201	-0.36328	0.942415	0.792656	-0.262863	3	4	1.27618	0.922536		0.469748	0.722889	9	1	1.11707	1.49695	0.597181	0.180226	1.34006	6	11	1.18614	0.567976		0.63205	0.478844	11	13	1.11064	1.2275		0.269068	1.10521	24	13	1.08493	1.54684	0.492058	0.153943
CNAG_00972	6	23	0.676387	0.376531	0.999845	0.577746	0.55668	91	98	12.5243	0.759783	-0.20401	0.942006	0.788306	-0.268511	14	4	1.61056	-4.18352	0.0879608	0.00938908	-2.59755	10	7	0.770328	0.729639	0.759264	0.343548	0.947179	51	20	0.772739	0.758472	0.629769	0.326327	0.981538	36	37	0.751206	0.973274	0.416794	0.195108	1.29561	126	110	0.752188	0.526859	0.795695	0.483656
CNAG_00973	2	14	0.903593	-0.13816	0.999845	0.878477	-0.152901	33	34	5.71122	0.973161	0.487541	0.886531	0.61638	0.500987	12	3	0.794672	-0.788996	0.538385	0.32078	-0.992857	1	1	0.638451	0.0784997	0.981968	0.902144	0.122954	22	16	0.668817	-0.482257	0.740787	0.470873	-0.721059	20	44	0.600953	1.23542	0.146567	0.0398052	2.05576	38	53	0.59926	0.957409	0.413257	0.11012
CNAG_00974	2	10	1.06311	2.1354	0.620464	0.0445767	2.00863	53	198	11.2596	1.31745	-1.12858	0.752204	0.39164	-0.856646	4	0	1.33454	0.526317		0.6933	0.394381	4	2	1.15408	0.791592	0.851086	0.492772	0.685907	70	48	1.11105	1.56735		0.158334	1.4107	51	3	1.11349	1.02306		0.358208	0.918786	30	9	1.08455	1.32369	0.576685	0.222278
CNAG_00975	2	3	1.56016	-0.674938	0.999845	0.665299	-0.432609	6	13	1.7011	2.02536	-2.04008		0.313804	-1.00727	1	0	2.0957	1.10439		0.598207	0.52698	2	1	2.02662	0.584888		0.772885	0.288603	5	1	2.11317	-0.170646		0.935638	-0.0807536	16	10	1.99376	0.689054		0.729639	0.345606	14	12	1.99393	0.279956		0.888341
CNAG_00976	17	19	0.730992	-0.763289	0.999845	0.296401	-1.04418	56	88	24.6498	0.76119	0.224078	0.937295	0.768469	0.294378	31	10	0.85396	0.847267	0.538671	0.321118	0.992163	17	4	1.60639	-4.34283	0.0655518	0.00686196	-2.70347	33	46	0.78766	2.12302	0.0741461	0.00703146	2.69535	43	50	0.857	-0.840875	0.565007	0.326502	-0.981184	85	79	1.13099	-3.55401	0.0166504	0.00167575
CNAG_00977	7	42	0.704271	-0.180826	0.999845	0.797367	-0.256756	105	94	15.6249	0.75242	-0.106272	0.971428	0.88768	-0.14124	23	7	1.35896	2.48659		0.0672832	1.82978	12	4	1.36694	1.16071	0.792247	0.395809	0.84913	40	40	1.51896	-0.0737192		0.961292	-0.0485329	59	52	1.3364	1.21965	0.601736	0.361434	0.912637	113	131	1.27342	2.8757	0.158426	0.0239305
CNAG_00978	23	96	0.373869	0.338952	0.999845	0.364615	0.906606	355	388	52.4718	0.421272	-0.523614	0.581923	0.213892	-1.24294	36	19	1.45775	0.522036		0.720261	0.358111	18	15	1.35312	0.0853606	0.989169	0.949699	0.0630845	179	152	1.3617	0.0890153		0.947879	0.0653706	209	213	1.28035	0.560534		0.661533	0.437798	489	453	1.27639	0.221359	0.958445	0.862317
CNAG_00979	50	84	0.51258	-0.700793	0.999845	0.171566	-1.36719	232	283	84.5778	0.528429	-0.00388018	0.997692	0.994141	-0.00734286	67	42	0.569325	-1.79254	0.0353754	0.00164088	-3.14854	64	22	0.480164	0.381687	0.811324	0.426666	0.79491	101	94	0.478579	0.733245	0.396241	0.12549	1.53213	118	228	0.473876	1.33174	0.0315072	0.00494934	2.81031	262	461	0.474755	0.645451	0.516445	0.173974
CNAG_00980	0	1	1.82912	0.338692	0.999845	0.853099	0.185166	4	3	2.6196	1.92187	2.20486		0.25128	1.14725	4	0	0.603523	-0.33827	0.737275	0.575144	-0.560492	4	0	0.598729	-1.27867	0.224189	0.0327084	-2.13564	0	1	0.593374	-0.733184	0.522371	0.2166	-1.23562	4	3	0.583514	0.241247	0.839484	0.679285	0.413439	6	9	0.584872	-0.480787	0.754564	0.411056
CNAG_00981	0	6	1.3792	0.501527	0.999845	0.71613	0.363636	18	17	3.26058	1.46282	1.19371		0.414482	0.816032	6	2	0.7746	-0.00516852	0.996943	0.994676	-0.0066725	14	7	0.614847	2.75168	0.000117757	7.62737e-06	4.47538	8	6	0.674965	0.236303	0.886494	0.726266	0.350097	5	8	0.63572	0.914153	0.352859	0.150439	1.43798	11	15	0.625559	1.04515	0.385761	0.0947728
CNAG_00982	7	23	0.753816	-0.310876	0.999845	0.680045	-0.412402	55	70	14.1005	0.808951	0.0736664	0.983652	0.927442	0.0910641	7	12	2.83468	0.504005		0.85888	0.1778	6	2	2.58436	1.36392		0.597665	0.527761	35	28	2.59777	1.28481		0.620896	0.494581	26	47	2.62386	0.481031		0.854539	0.18333	77	94	2.5242	1.85186		0.463166
CNAG_00983	3	14	0.849837	-0.37128	0.999845	0.662196	-0.436884	31	33	7.69143	0.91324	0.482864	0.877526	0.596988	0.528737	14	3	0.76773	3.03369	0.0053903	7.76602e-05	3.95151	18	3	0.783404	0.738777	0.759785	0.345663	0.943035	16	11	0.779714	1.03295	0.480644	0.185245	1.32478	17	17	0.767277	1.43136	0.197697	0.0621111	1.8655	33	29	0.764012	1.39322	0.323285	0.0682197
CNAG_00984	13	93	0.657279	0.381121	0.999845	0.562018	0.579847	343	264	44.5429	0.695377	-0.587664	0.758488	0.398054	-0.845102	42	6	0.832077	-0.195702	0.885649	0.814056	-0.235196	57	56	0.689587	0.919261	0.598485	0.182512	1.33306	169	151	0.856256	-1.52917	0.303469	0.0741195	-1.78588	150	137	0.7724	-1.18189	0.315458	0.125978	-1.53016	482	434	0.724546	-0.824773	0.611213	0.254982
CNAG_00985	1	14	1.16089	-0.16399	0.999845	0.887662	-0.141263	26	30	6.65252	1.21131	0.787614	0.834086	0.515553	0.650216	6	7	1.81719	2.7212		0.13427	1.49748	19	8	1.72213	3.32584	0.309944	0.0534537	1.93124	8	20	1.75342	2.55729		0.144715	1.45846	29	7	1.75277	2.07351		0.236813	1.18299	28	31	1.74357	1.87734	0.640346	0.281605
CNAG_00986	2	9	1.18272	0.418612	0.999845	0.723383	0.353941	44	28	9.40687	1.24111	0.890646	0.809612	0.472991	0.71762	1	9	1.00099	0.998698		0.318421	0.997707	4	2	0.911886	0.963107	0.726986	0.29089	1.05617	20	17	0.913323	1.02065		0.263775	1.11751	17	12	0.874547	1.52009	0.237814	0.0821861	1.73814	27	43	0.864281	1.53737	0.342879	0.0752748
CNAG_00987	5	17	0.81378	-0.137123	0.999845	0.866189	-0.168501	59	44	15.2473	0.840488	1.22758	0.487886	0.144136	1.46056	11	19	6.76629	-0.858227		0.899068	-0.126839	7	7	6.68895	0.373021		0.955528	0.0557667	29	16	6.75454	-0.641386		0.92435	-0.0949563	38	43	6.76629	-2.48538		0.713381	-0.367319	58	74	6.76629	-2.88979		0.669316
CNAG_00988	31	85	0.394424	0.13904	0.999845	0.724452	0.352515	340	349	55.3683	0.422225	0.0666299	0.968419	0.874609	0.157807	65	26	0.898946	2.58736	0.0577731	0.00399937	2.87821	33	13	0.898814	1.38199	0.504224	0.124155	1.53757	173	120	0.888648	1.68293	0.261242	0.058251	1.8938	195	219	0.886644	1.23851	0.37023	0.162458	1.39685	449	482	0.85243	2.02247	0.126808	0.0176635
CNAG_00989	2	17	0.978184	0.144388	0.999845	0.882652	0.147608	47	46	6.72957	1.06534	-0.0120314	0.996925	0.990989	-0.0112935	12	1	0.497207	0.643293	0.40722	0.19573	1.29381	4	1	0.480881	0.01961	0.991556	0.967472	0.0407794	17	17	0.467116	0.920263	0.235691	0.0488273	1.9701	21	35	0.458926	1.22451	0.0439234	0.00762552	2.66822	55	53	0.458181	0.918921	0.250545	0.0449004
CNAG_00990	19	69	0.393238	-0.0606952	0.999845	0.877336	-0.154347	216	212	42.4983	0.426475	0.2215	0.880649	0.603501	0.519373	46	24	0.851568	-1.63094	0.209208	0.0554646	-1.91522	44	20	0.613818	-0.403006	0.863104	0.511466	-0.656556	94	95	0.58414	0.538098	0.654869	0.356957	0.921179	157	137	0.565709	0.966975	0.248451	0.0873925	1.70932	260	286	0.560463	0.977411	0.354594	0.0811706
CNAG_00991	4	17	0.655098	0.426862	0.999845	0.51466	0.651599	69	71	10.5229	0.755487	0.00257046	0.998238	0.997285	0.00340239	9	5	2.04828	3.67393		0.0728666	1.79367	6	6	2.13823	1.80476		0.398645	0.844044	25	21	2.31425	0.930615		0.687593	0.402124	22	42	1.96104	3.13319		0.110105	1.59772	80	77	1.93999	3.16718		0.102557
CNAG_00992	47	255	0.392419	0.126665	0.999845	0.746861	0.322781	744	781	106.075	0.412504	-0.522649	0.570649	0.20515	-1.26702	98	38	1.68895	-2.91981		0.0838493	-1.72878	68	22	1.16237	-1.50992	0.611826	0.193944	-1.299	378	261	1.45349	-3.11892		0.0318883	-2.14581	463	469	1.11826	-1.41989		0.204181	-1.26973	919	1001	1.15042	-2.20194		0.0556166
CNAG_00993	4	14	0.798338	-0.817143	0.999845	0.306045	-1.02356	22	30	7.51359	0.838996	0.778525	0.72511	0.353447	0.927925	16	6	0.547545	-2.03324	0.00963591	0.000204507	-3.71338	2	2	0.489814	-0.382086	0.81693	0.435354	-0.780062	15	4	0.485708	0.52544	0.587848	0.279341	1.0818	22	18	0.483176	0.881026	0.210356	0.0682421	1.8234	36	46	0.483037	0.540646	0.621068	0.263028
CNAG_00994	5	22	0.732013	-0.198841	0.999845	0.785902	-0.271636	47	68	10.0457	0.83812	-0.572605	0.821485	0.494479	-0.683202	11	2	1.86475	-1.78812		0.337607	-0.958904	13	2	1.43681	-0.718837		0.616864	-0.5003	20	28	1.63209	-1.8824		0.248759	-1.15337	44	40	1.92468	-4.80944		0.0124604	-2.49883	69	102	1.38066	-0.88581		0.521144
CNAG_00995	21	657	0.92527	0.787076	0.999845	0.394967	0.850645	2295	1812	184.437	0.933571	-1.1204	0.604441	0.23009	-1.20013	133	32	1.09493	0.830883	0.634206	0.447943	0.758849	103	48	0.926413	5.41965	1.06317e-07	4.91161e-09	5.85014	898	905	1.22823	-1.23027	0.622284	0.316505	-1.00167	775	942	1.24731	-1.81851	0.347345	0.144855	-1.45795	2471	2355	0.953606	1.41815	0.462462	0.136978
CNAG_00996	16	99	0.590529	0.237341	0.999845	0.687749	0.401912	319	294	42.2072	0.618436	-0.17687	0.939003	0.774882	-0.285995	59	11	0.460735	-0.310708	0.675193	0.500073	-0.674376	29	25	0.419873	0.189249	0.926042	0.652185	0.450729	190	112	0.422663	0.0902446	0.924282	0.830926	0.213515	169	173	0.413929	0.340146	0.646787	0.411219	0.82175	362	388	0.413836	-0.0556243	0.971794	0.893077
CNAG_00997	10	39	0.61374	-0.582942	0.999845	0.342204	-0.94982	94	70	22.057	0.641295	0.549514	0.752204	0.39151	0.856882	22	22	0.712646	-0.334396	0.786721	0.638904	-0.469232	16	19	0.616025	0.0279112	0.990963	0.963861	0.0453085	32	37	0.610483	0.279841	0.858038	0.64667	0.458394	63	51	0.587837	0.680315	0.480747	0.247142	1.15732	101	101	0.58614	0.368772	0.811029	0.529249
CNAG_00998	6	16	0.658417	-0.183731	0.999845	0.780206	-0.27905	44	59	13.0214	0.7012	0.864936	0.58778	0.217386	1.23351	17	11	1.03377	-0.253962		0.805941	-0.245666	9	6	0.960566	-0.820462	0.791763	0.393025	-0.854144	18	21	0.948402	-0.603564		0.524515	-0.636401	35	47	1.08626	-2.22307		0.0407032	-2.04654	55	55	0.888648	-0.612354	0.797049	0.49077
CNAG_00999	3	11	0.736408	1.04284	0.999845	0.156741	1.41612	74	72	9.0778	0.918022	-0.474018	0.881822	0.605612	-0.516347	5	2	1.07103	0.136926		0.898271	0.127845	7	4	1.0661	-1.03061	0.755344	0.333687	-0.966713	33	32	1.1727	-1.79297		0.126282	-1.52893	49	32	1.0278	-0.994199		0.333389	-0.967311	87	94	1.04547	-1.61959	0.43215	0.121347
CNAG_01000	15	93	0.477343	0.2197	0.999845	0.645333	0.460255	288	287	37.0158	0.514173	-0.23475	0.897037	0.647989	-0.456558	41	17	2.16619	1.98259		0.360063	0.915245	37	19	1.73375	4.50159	0.0859899	0.00941944	2.59644	147	128	1.98749	1.78586		0.368891	0.898552	134	190	1.73585	4.0349		0.0201012	2.32445	366	362	1.74481	3.38255		0.0525455
CNAG_01001	1	9	1.09938	-0.0387376	0.999845	0.971892	-0.035236	24	20	5.85707	1.13501	1.56764	0.518971	0.167227	1.38117	5	10	1.46411	1.56976		0.283646	1.07216	4	1	1.34591	1.83446	0.589288	0.172885	1.36299	12	20	1.43648	0.684257		0.63383	0.476343	14	8	1.37702	0.888087		0.518969	0.644935	21	17	1.36456	0.677907	0.855908	0.619333
CNAG_01002	3	11	0.91785	-0.467445	0.999845	0.610554	-0.509283	17	34	5.90477	0.969824	0.77267	0.776203	0.425618	0.796712	10	6	0.999424	1.03155		0.302002	1.03215	9	5	0.933512	0.625104	0.857715	0.503096	0.669627	9	14	0.891619	1.55649		0.0808651	1.74569	17	7	0.879278	1.43063	0.277187	0.103727	1.62705	18	15	0.890587	0.682353	0.775363	0.443567
CNAG_01003	27	89	0.579266	-0.12942	0.999845	0.823208	-0.22342	314	239	46.5452	0.604955	-0.272177	0.897725	0.652774	-0.449912	66	11	1.24088	-0.31332		0.800656	-0.252498	46	21	1.04983	0.799345	0.82414	0.446415	0.761406	138	112	1.09064	0.0477229		0.965098	0.0437567	170	176	1.16176	-1.3149	0.493489	0.257712	-1.13181	307	355	1.02818	0.755192	0.784424	0.462648
CNAG_01004	5	22	0.660092	0.152648	0.999845	0.817119	0.231253	87	61	16.6097	0.693929	1.08585	0.438066	0.117633	1.56479	18	17	0.770371	-0.518431	0.676121	0.500971	-0.672963	12	4	0.656173	0.206091	0.94877	0.75346	0.31408	47	29	0.771942	-1.66456	0.180338	0.031058	-2.15633	40	38	0.659586	-0.304873	0.812851	0.643925	-0.462218	87	88	0.658876	-0.688301	0.655608	0.29618
CNAG_01005	16	50	0.442777	-0.206608	0.999845	0.640773	-0.466618	142	156	28.871	0.487028	0.00466592	0.997005	0.992356	0.0095804	32	15	0.691061	-0.506124	0.647404	0.463933	-0.732387	19	14	0.628459	0.134298	0.960557	0.830785	0.213695	61	57	0.637943	-0.231582	0.883168	0.716595	-0.363013	98	111	0.708475	-2.4189	0.00532645	0.00063962	-3.41423	217	240	0.619572	-0.0387341	0.99224	0.950151
CNAG_01006	1	4	1.03102	0.931277	0.999845	0.366388	0.903261	28	20	5.80357	1.108	1.66012	0.467082	0.134053	1.49831	5	5	0.606519	0.647447	0.505835	0.285756	1.06748	2	2	0.579	0.527601	0.771981	0.362176	0.911227	14	7	0.600197	-0.293129	0.850581	0.625275	-0.488388	19	15	0.57288	0.546024	0.579735	0.340529	0.953121	20	22	0.573241	0.111786	0.952136	0.845387
CNAG_01007	3	27	0.740821	0.275421	0.999845	0.710058	0.371778	92	69	12.5997	0.79035	0.51527	0.833194	0.514433	0.651951	18	8	2.15814	-2.86521		0.184301	-1.32763	12	5	1.70971	-0.0518414		0.97581	-0.0303217	39	38	1.78411	-0.767331		0.66713	-0.430091	59	46	1.92736	-2.1805		0.257911	-1.13134	103	91	1.81498	-1.91474		0.291443
CNAG_01008	0	13	1.2926	0.700337	0.999845	0.587952	0.541806	33	47	8.14094	1.32116	1.79247	0.531194	0.174865	1.35674	11	10	1.60871	-1.77221		0.270619	-1.10164	9	5	0.910783	1.73753	0.320786	0.0564266	1.90773	20	21	0.980536	0.415186		0.671983	0.423427	8	19	0.929889	0.806805	0.625716	0.385594	0.867636	27	29	0.943532	0.111749	0.975664	0.905721
CNAG_01009	3	12	0.828586	-0.395215	0.999845	0.63338	-0.476975	29	28	9.46543	0.94652	-0.172384	0.959384	0.855486	-0.182124	6	3	1.30455	0.570312		0.661987	0.437171	5	1	1.23185	-0.00549945	0.999286	0.996438	-0.00446438	11	11	1.20994	0.332777		0.783289	0.275035	24	23	1.23629	-0.461709		0.708802	-0.373465	37	25	1.14392	0.592989	0.851317	0.604192
CNAG_01010	9	55	0.47916	0.54504	0.999845	0.255333	1.13749	209	226	36.9655	0.500944	1.12386	0.190303	0.0248661	2.24348	59	29	2.18972	2.4673		0.259841	1.12677	55	22	2.2951	0.361229		0.874937	0.157391	119	102	2.22566	0.971501		0.662474	0.4365	127	85	2.19455	0.779268		0.72252	0.355092	234	213	2.14224	1.07988		0.614197
CNAG_01011	0	3	1.70836	-0.223545	0.999845	0.895891	-0.130853	5	6	2.06759	1.7732	1.6531		0.351199	0.932266	5	1	0.586662	-1.83533	0.0363444	0.00175746	-3.12843	2	2	0.466049	-0.161858	0.947991	0.728367	-0.347299	4	2	0.463487	0.125882	0.911552	0.785932	0.271596	11	5	0.454002	0.603965	0.398682	0.183414	1.33032	11	7	0.454891	0.0727488	0.960983	0.87294
CNAG_01012	14	36	0.562852	0.617952	0.999845	0.27225	1.0979	183	235	38.27	0.592955	0.645155	0.658541	0.27658	1.08803	30	24	1.04928	0.521249		0.619352	0.496769	24	10	0.907231	1.48344	0.459746	0.102022	1.63513	122	106	0.939465	0.768793	0.695874	0.413168	0.818331	73	33	0.913043	0.900506	0.562974	0.324001	0.986269	96	97	0.904933	0.75339	0.749863	0.405106
CNAG_01013	5	28	0.926618	0.343406	0.999845	0.710935	0.370601	92	102	13.6119	1.04014	-1.10619	0.669774	0.287556	-1.0635	2	6	0.744016	-1.42927	0.207742	0.0547295	-1.92102	9	11	0.665323	-0.409971	0.87781	0.537764	-0.616198	56	49	0.688932	-1.36233	0.233474	0.047991	-1.97745	65	36	0.673923	-1.28061	0.188979	0.0574028	-1.90023	90	80	0.656691	-0.515056	0.769054	0.432852
CNAG_01014	10	77	0.761448	-0.0216293	0.999845	0.977339	-0.0284055	204	167	26.2685	0.793312	-0.277172	0.925431	0.726799	-0.349386	26	15	0.607122	1.04482	0.262746	0.0852627	1.72093	22	10	0.6264	-1.01412	0.463786	0.105453	-1.61897	132	75	0.626998	-0.934684	0.410202	0.136032	-1.49073	148	151	0.624439	-1.3499	0.123372	0.0306349	-2.16178	232	242	0.624535	-1.75879	0.0431486	0.00486013
CNAG_01015	4	24	0.669215	-0.00504199	0.999845	0.993989	-0.00753418	58	73	12.0884	0.758971	-0.205907	0.941118	0.786162	-0.271297	12	4	0.570711	-0.622311	0.496158	0.275531	-1.09041	6	6	0.520719	-0.689592	0.600939	0.185401	-1.32431	43	23	0.508456	-0.113778	0.919319	0.822934	-0.223773	35	32	0.497718	-0.0254599	0.985552	0.959203	-0.0511533	53	66	0.498122	-0.458209	0.708017	0.357639
CNAG_01016	9	38	0.554849	-0.412044	0.999845	0.457709	-0.742624	74	100	16.6648	0.627728	-0.466682	0.796909	0.457211	-0.743447	16	7	0.675146	-1.61137	0.121854	0.0170002	-2.3867	4	1	0.538258	0.439844	0.803231	0.413835	0.817163	48	28	0.565963	-0.82768	0.421414	0.143624	-1.46243	68	84	0.560232	-1.12721	0.157625	0.0442157	-2.01204	111	81	0.541579	-0.608693	0.619553	0.261046
CNAG_01017	2	26	0.757494	-0.0489904	0.999845	0.948433	-0.0646742	58	58	12.4476	0.825997	0.136667	0.966495	0.868584	0.165457	15	4	0.512923	-1.24639	0.114643	0.0150997	-2.42998	9	6	0.418916	0.63409	0.515611	0.130116	1.51364	28	26	0.424731	0.232262	0.822213	0.584485	0.546845	45	33	0.416228	0.544665	0.409674	0.190679	1.30857	68	63	0.41482	0.329392	0.765945	0.427161
CNAG_01018	49	127	0.415494	-0.142444	0.999845	0.731726	-0.34283	409	471	73.2366	0.445887	-0.71641	0.423875	0.108119	-1.60671	63	21	4.10216	0.581081		0.887355	0.141652	51	14	3.9852	1.68514		0.672405	0.42285	184	150	4.08176	0.807572		0.843163	0.197849	244	266	3.91326	2.29201		0.558074	0.585704	544	562	3.89956	2.18786		0.574761
CNAG_01019	23	58	0.627122	0.252034	0.999845	0.687765	0.40189	348	192	41.3074	0.664534	-0.471244	0.812041	0.47824	-0.709136	34	12	0.613804	-0.891852	0.349633	0.146226	-1.45299	26	14	0.559746	-0.105937	0.967201	0.84989	-0.189259	111	86	0.592454	-1.49546	0.0967189	0.0115971	-2.52417	309	156	0.566829	-0.970492	0.247758	0.0868707	-1.71214	420	307	0.553232	-0.295568	0.844672	0.593164
CNAG_01020	10	25	0.535744	0.0401846	0.999845	0.940209	0.0750072	81	113	26.8718	0.570278	0.858724	0.463077	0.132119	1.5058	30	16	1.64639	-4.18244		0.0110737	-2.54036	22	14	0.870835	0.0551395	0.989169	0.949513	0.0633179	47	36	1.03194	-1.62943		0.114337	-1.57899	46	35	0.992026	-1.82082		0.066438	-1.83546	91	100	0.851554	-0.323365	0.896818	0.704142
CNAG_01021	16	56	0.439875	0.10577	0.999845	0.809979	0.240454	208	188	28.7869	0.498766	-0.43248	0.748489	0.385887	-0.8671	25	12	2.66778	-0.863834		0.746087	-0.323803	20	5	2.71489	-2.24844		0.407564	-0.828188	90	92	2.49046	-0.795516		0.749404	-0.319426	94	130	2.72952	-4.07099		0.135839	-1.49147	250	242	2.41969	-0.920176		0.703733
CNAG_01022	1	28	0.995264	0.632309	0.999845	0.525221	0.635318	91	84	11.3262	1.05591	0.140752	0.971428	0.893956	0.1333	14	4	1.24761	0.160262		0.897788	0.128456	7	5	0.999218	1.43444	0.553138	0.151127	1.43556	61	35	1.0843	0.225657		0.835141	0.208113	39	38	1.01902	0.620861	0.750789	0.542343	0.609274	86	93	0.983588	1.0421	0.648785	0.289376
CNAG_01023	19	92	0.445237	-0.718208	0.999845	0.106725	-1.61309	157	166	36.1387	0.480065	-0.292865	0.84957	0.541827	-0.610052	40	19	0.778952	-0.0965338	0.942496	0.901372	-0.123928	30	14	0.811369	-1.72365	0.22932	0.033639	-2.12437	118	75	0.70992	0.296751	0.865963	0.675942	0.418007	131	128	0.759417	-1.41907	0.196889	0.061674	-1.86863	203	228	0.733234	-1.29665	0.346011	0.0769949
CNAG_01024	2	20	0.853669	-0.38409	0.999845	0.652762	-0.449928	38	36	7.58856	0.906303	0.528696	0.858231	0.559655	0.583354	13	6	0.502998	-1.23475	0.109673	0.0140969	-2.45478	7	7	0.458002	-0.200926	0.929074	0.660878	-0.438702	18	11	0.455019	0.302495	0.770592	0.506181	0.664796	29	40	0.451291	0.506948	0.497488	0.261298	1.12333	39	48	0.450257	0.378317	0.745457	0.400782
CNAG_01025	5	21	0.78134	-0.320086	0.999845	0.682054	-0.409662	57	46	9.88743	0.893244	-0.695754	0.783109	0.436035	-0.778907	8	3	1.35169	-1.09373		0.418423	-0.809161	8	3	0.926128	0.971417	0.729667	0.294224	1.0489	29	30	0.980441	0.120745		0.901985	0.123154	38	43	0.963414	-0.133041		0.890167	-0.138093	68	62	0.927634	0.126313	0.971395	0.89169
CNAG_01026	7	13	0.930276	0.296225	0.999845	0.750161	0.318428	86	60	9.19069	1.068	-1.05642	0.701854	0.322586	-0.989158	6	2	0.831352	-1.00618	0.44484	0.226169	-1.21029	4	1	0.648353	-0.192188	0.94877	0.766906	-0.296425	26	32	0.62712	0.419063	0.770077	0.503984	0.668234	35	31	0.614106	0.353331	0.76982	0.565049	0.575359	76	69	0.604276	0.378672	0.812933	0.530887
CNAG_01027	19	49	0.487907	-0.00944386	0.999845	0.984557	-0.0193558	195	174	29.5035	0.529258	-0.0791942	0.969257	0.881055	-0.149633	33	15	0.702746	-0.15431	0.894303	0.826197	-0.219582	29	11	0.594993	0.553479	0.7648	0.352254	0.930227	99	80	0.666707	-0.846137	0.505537	0.204395	-1.26913	69	104	0.602352	-0.0833343	0.949399	0.889965	-0.138348	241	248	0.590432	-0.0928538	0.962289	0.875037
CNAG_01028	4	10	0.972664	-1.34731	0.999845	0.165998	-1.38518	15	15	4.86943	1.21529	-1.51073	0.581923	0.213831	-1.2431	4	0	0.782123	0.108725	0.937927	0.88944	0.139013	1	2	0.691006	0.113523	0.971424	0.869505	0.164287	10	6	0.767328	-0.871598	0.56324	0.256003	-1.13589	7	7	0.660352	0.451507	0.711359	0.494141	0.683738	19	33	0.68159	-0.505754	0.78024	0.458074
CNAG_01029	8	43	0.595791	-0.221653	0.999845	0.70987	-0.372031	87	119	17.4461	0.652995	-0.234765	0.922983	0.719206	-0.35952	22	7	1.04663	2.79396	0.0780151	0.00759697	2.66948	19	5	1.00017	3.04528	0.0253767	0.00232858	3.04477	65	44	1.06348	1.35003	0.505537	0.204282	1.26945	51	64	1.02309	1.74361	0.250041	0.0883319	1.70426	122	139	1.02675	1.2344	0.585434	0.229269
CNAG_01030	0	0	2.05528	3.0534	0.999845	0.137374	1.48564	14	5	2.53032	2.09481	4.77096		0.0227556	2.27751	7	2	0.814777	0.67266	0.605908	0.409045	0.825576	0	0	0.826433	-0.690045	0.795587	0.403736	-0.834967	1	10	0.848834	-0.865142	0.61584	0.308102	-1.01921	3	5	0.745096	0.433319	0.76606	0.560862	0.581561	8	8	0.734158	0.420955	0.83165	0.566384
CNAG_01031	9	120	0.697382	0.69919	0.999845	0.316058	1.00259	474	358	36.3391	0.749747	-1.2419	0.406985	0.0976367	-1.65642	19	10	1.56051	-2.77205		0.0756709	-1.77638	31	20	0.826901	0.599004	0.835402	0.468822	0.724397	215	131	1.00866	-1.58444		0.116223	-1.57083	140	192	0.861166	-0.53425		0.535008	-0.62038	546	611	0.871036	-1.09939	0.558534	0.20689
CNAG_01032	0	21	1.01854	0.680534	0.999845	0.504042	0.668144	70	58	18.7326	1.04142	1.76677	0.390514	0.0897906	1.6965	21	14	0.584494	-1.25451	0.162158	0.0318479	-2.14631	20	13	0.444731	0.431928	0.755071	0.331442	0.971213	30	22	0.506133	-1.33113	0.0822736	0.00853865	-2.62999	39	24	0.469649	-0.981962	0.138103	0.0365424	-2.09084	41	24	0.44853	-0.577916	0.545285	0.197583
CNAG_01033	8	19	0.635767	-0.60674	0.999845	0.33991	-0.954343	47	50	11.4975	0.734341	-0.501919	0.821485	0.494294	-0.683496	9	5	1.3582	-0.126804		0.925616	-0.0933619	11	0	1.25552	-0.597336	0.917987	0.634239	-0.475769	19	30	1.16809	0.569853		0.625655	0.487851	17	28	1.15468	0.326791		0.777165	0.283015	64	49	1.14143	0.223896	0.952136	0.84449
CNAG_01034	1	5	1.02498	0.0683721	0.999845	0.946816	0.0667059	18	13	7.53575	1.03347	2.76361	0.0871045	0.0074926	2.67412	11	13	0.819424	0.0464084	0.971513	0.954836	0.0566354	7	2	0.693527	0.957909	0.580534	0.167214	1.38121	4	7	0.704608	0.705563	0.622284	0.316655	1.00135	14	7	0.673507	1.49538	0.110886	0.0263991	2.22029	8	13	0.668545	1.45288	0.188174	0.0297651
CNAG_01035	14	50	0.471141	0.0554216	0.999845	0.906359	0.117633	157	181	26.3823	0.536717	-0.513971	0.715102	0.338254	-0.95762	18	12	2.68122	-0.87332		0.744638	-0.325717	20	7	2.7428	-3.67271		0.180559	-1.33904	88	53	2.39074	0.809838		0.734806	0.338739	82	98	2.47067	-0.974764		0.693186	-0.394535	191	225	2.37641	0.31266		0.895326
CNAG_01036	3	17	0.815972	-0.0100566	0.999845	0.990167	-0.0123247	50	44	6.033	1.04637	-1.41019	0.534207	0.177753	-1.34771	4	1	0.640778	0.832454	0.404199	0.1939	1.29913	3	2	0.608144	0.251196	0.93471	0.679568	0.413053	9	13	0.610231	0.288077	0.856541	0.636871	0.472078	19	19	0.570591	1.14254	0.159705	0.045244	2.00238	40	47	0.564004	1.14311	0.240625	0.0426853
CNAG_01037	3	7	0.970349	-0.163122	0.999845	0.8665	-0.168106	33	16	5.67307	1.11337	-0.185483	0.966091	0.867688	-0.166596	6	1	0.776014	-0.336141	0.807553	0.664895	-0.433164	4	4	0.664855	0.399207	0.883902	0.548211	0.600443	9	27	0.666341	0.446706	0.768674	0.502612	0.670386	11	13	0.64726	0.758911	0.475029	0.240997	1.1725	15	19	0.644937	0.489379	0.777665	0.447972
CNAG_01038	3	13	0.77556	0.16696	0.999845	0.829552	0.215277	51	38	7.89359	0.828685	0.960131	0.624073	0.246611	1.15862	17	5	1.76497	-1.97845		0.262307	-1.12095	9	1	1.26904	-0.423128		0.738814	-0.333425	18	33	1.55813	-2.25201		0.148365	-1.44533	21	32	1.26616	-0.792806		0.531215	-0.626152	61	55	1.22378	-0.548497		0.654009
CNAG_01039	16	68	0.467712	-0.115499	0.999845	0.804951	-0.246945	209	173	30.7282	0.512583	-0.291085	0.863873	0.570117	-0.567879	34	13	0.78904	-0.372525	0.785177	0.636838	-0.472124	16	5	0.630596	1.76419	0.0511417	0.00514746	2.79766	110	76	0.783801	-1.4527	0.277546	0.0638249	-1.8534	123	149	0.704242	-0.96255	0.383893	0.171692	-1.36679	250	228	0.657718	-0.316159	0.860795	0.630736
CNAG_01040	1	0	1.93322	1.20887	0.999845	0.531766	0.625313	8	8	2.29533	1.98107	2.95184		0.136218	1.49003	2	4	0.760912	-0.283371	0.833708	0.709588	-0.372409	2	1	0.596539	1.79355	0.0284461	0.00264184	3.0066	8	8	0.672657	-0.375415	0.819532	0.576771	-0.558108	3	5	0.674801	-0.902056	0.397361	0.181297	-1.33677	8	4	0.616534	0.0267532	0.995499	0.965388
CNAG_01041	1	3	1.39021	-0.474655	0.999845	0.732782	-0.341427	9	6	4.10165	1.39715	2.36948	0.390746	0.0898972	1.69594	4	8	5.20625	-0.869539		0.867356	-0.167018	5	0	5.06541	1.07517		0.831906	0.212257	4	1	5.05412	1.47472		0.770451	0.291785	9	6	5.17828	-0.855383		0.868797	-0.165187	11	13	5.20625	-2.90112		0.577365
CNAG_01042	0	13	1.30126	-0.832339	0.999845	0.522406	-0.639641	21	7	8.54278	1.32455	1.34669	0.689674	0.309287	1.01672	7	8	1.88821	-0.929227		0.622634	-0.492121	8	1	2.08547	-2.9373		0.158995	-1.40846	11	4	1.74655	-1.22172		0.484237	-0.699504	9	3	1.76228	-1.83514		0.297716	-1.04134	10	7	1.7619	-2.23721		0.204166
CNAG_01043	42	203	0.38047	0.373916	0.999845	0.325719	0.982774	831	682	92.5973	0.414399	-0.974303	0.160329	0.0187167	-2.35113	58	24	0.720465	2.33809	0.0303207	0.00117346	3.24525	66	36	0.722562	1.04873	0.546366	0.146668	1.4514	341	354	0.720296	1.20815	0.344513	0.0934837	1.6773	319	359	0.697471	1.63666	0.0890795	0.0189478	2.34656	904	917	0.690709	1.66505	0.117601	0.0159244
CNAG_01044	5	62	0.652884	0.510107	0.999845	0.434618	0.781313	200	195	24.8604	0.697064	-0.0898356	0.972187	0.897455	-0.128877	23	12	1.96467	-2.85568		0.146081	-1.45352	38	26	1.4418	0.165273		0.908739	0.11463	110	98	1.51622	-0.542166		0.72066	-0.357577	110	72	1.4579	-0.44836		0.758434	-0.307538	209	196	1.48443	-1.14835		0.439169
CNAG_01045	7	37	0.702714	0.117942	0.999845	0.866711	0.167838	141	85	15.9768	0.791728	-0.831429	0.673688	0.293651	-1.05015	14	3	1.21141	-1.13595		0.348397	-0.937704	14	2	0.974115	-0.232434	0.956053	0.811408	-0.23861	42	41	1.07249	-1.34001		0.211506	-1.24944	57	65	0.976344	-0.676382	0.70794	0.488454	-0.69277	124	140	0.946145	-0.437909	0.865629	0.643483
CNAG_01046	18	40	0.560192	-0.344	0.999845	0.539166	-0.614075	120	139	26.3948	0.595994	0.0537172	0.983652	0.928184	0.0901303	28	17	0.530473	-0.334457	0.699447	0.528376	-0.630487	12	2	0.49214	0.0143346	0.99463	0.976763	0.029127	71	61	0.492806	0.0722743	0.953008	0.883401	0.146659	72	119	0.47993	0.936038	0.175862	0.051133	1.95036	152	229	0.482671	0.116079	0.941784	0.809948
CNAG_01047	6	36	0.597154	0.120062	0.999845	0.840654	0.201058	100	113	17.5305	0.6765	-0.398319	0.855311	0.555999	-0.588794	16	5	0.766256	-2.07503	0.0745263	0.00676878	-2.70801	28	15	0.59506	0.261133	0.929074	0.660781	0.438835	52	55	0.588274	1.02738	0.321531	0.0807367	1.74643	51	56	0.582638	1.44633	0.067237	0.0130508	2.48238	132	133	0.582573	1.05457	0.331076	0.0702667
CNAG_01048	4	9	0.869154	-0.873733	0.999845	0.314768	-1.00527	19	20	8.53278	0.889682	1.40372	0.435631	0.114618	1.57777	11	12	0.838588	-0.997802	0.450909	0.234102	-1.18986	10	3	0.677983	0.355422	0.909216	0.600116	0.524234	7	9	0.69173	-0.00921739	0.99482	0.989368	-0.0133251	7	5	0.669749	0.318269	0.80569	0.634639	0.475207	19	11	0.663394	0.267763	0.887119	0.686488
CNAG_01049	10	18	0.779939	-1.27064	0.999845	0.103282	-1.62915	29	40	10.6559	0.84113	-0.367498	0.902789	0.662177	-0.43691	13	5	2.84086	-0.859493		0.762235	-0.302547	5	7	2.82657	-0.662362		0.814725	-0.234334	17	20	2.80844	-0.613972		0.826949	-0.218617	41	20	2.55137	0.969779		0.70387	0.380102	44	62	2.51732	1.14775		0.648433
CNAG_01050	8	22	0.99014	-0.356578	0.999845	0.718751	-0.360129	82	46	11.3624	1.07214	-0.846084	0.779575	0.430022	-0.789153	10	3	1.5368	0.544569		0.723075	0.354352	1	3	1.23864	1.64958	0.599527	0.182934	1.33177	23	25	1.23975	1.70951		0.167919	1.37892	38	47	1.19471	2.24912	0.193512	0.0597602	1.88256	100	84	1.17045	2.97222	0.088912	0.011105
CNAG_01051	8	28	0.585815	-0.365237	0.999845	0.532977	-0.623469	83	60	14.1695	0.653429	-0.130229	0.955718	0.842027	-0.199302	16	7	0.658602	1.85076	0.0636465	0.00495208	2.81013	16	5	0.648531	0.877495	0.594663	0.176039	1.35305	39	27	0.66082	0.670213	0.617677	0.31048	1.01422	49	64	0.630958	1.00444	0.290936	0.111402	1.59192	98	111	0.628277	0.700421	0.621329	0.264923
CNAG_01052	11	342	0.97617	0.802358	0.999845	0.411108	0.821945	1108	1061	100.253	0.986851	-0.648116	0.83135	0.511341	-0.656751	105	19	1.13302	-0.598685		0.597224	-0.528397	134	65	0.92729	-0.307419	0.94877	0.740249	-0.331524	561	501	1.02222	-1.07169		0.294458	-1.04839	503	551	0.89262	-0.268685	0.889712	0.763409	-0.301007	1545	1337	0.857829	-0.04449	0.994832	0.958637
CNAG_01053	15	59	0.44867	-0.0510934	0.999845	0.909335	-0.113877	179	178	31.6772	0.497305	-0.207357	0.908227	0.676706	-0.416963	28	15	0.96561	2.50657	0.0881432	0.00943606	2.59584	14	10	0.978775	0.975369	0.753134	0.318997	0.996521	77	59	1.06742	-0.171327	0.947415	0.872483	-0.160505	96	108	0.935658	1.92378	0.146567	0.0397758	2.05607	190	225	0.955928	0.734677	0.774119	0.442161
CNAG_01054	4	11	0.908342	-0.962004	0.999845	0.289565	-1.05908	17	24	4.67153	1.10918	-1.17653	0.670251	0.288815	-1.06072	4	1	1.77273	2.44441		0.167927	1.37889	4	1	1.67636	2.52586	0.518205	0.131875	1.50675	6	9	1.73659	1.68677		0.331391	0.971316	16	7	1.65848	2.54799		0.124454	1.53635	26	19	1.64204	2.68982	0.397928	0.101401
CNAG_01055	11	48	0.472791	0.531834	0.999845	0.26064	1.12488	202	217	28.5561	0.529941	-0.125749	0.947942	0.812433	-0.237288	27	10	1.04812	-2.39179	0.139652	0.0224907	-2.28198	15	4	1.02698	0.658371	0.869498	0.521474	0.641074	87	81	1.03034	-1.20969	0.548812	0.240369	-1.17407	129	116	1.06794	-4.97367	4.44177e-05	3.20444e-06	-4.65726	213	233	1.02708	-0.264398	0.934449	0.796849
CNAG_01056	1	3	1.34609	0.984593	0.999845	0.464506	0.731448	17	24	3.15015	1.50872	0.619272		0.681467	0.410462	5	0	1.77607	-0.0464956		0.979115	-0.0261789	1	1	1.60748	0.52132		0.745705	0.324308	10	6	1.71869	-0.760507		0.658134	-0.442491	12	5	1.86628	-2.17382		0.244105	-1.16479	6	2	2.10524	-4.89667		0.0200219
CNAG_01057	13	13	0.975659	-0.817016	0.999845	0.402368	-0.837399	76	30	17.1436	1.01047	0.0535702	0.990635	0.95772	0.053015	13	11	1.83604	-1.04488		0.569292	-0.569094	9	5	1.34634	0.623697	0.922183	0.643182	0.463254	33	17	1.33864	0.822115		0.539123	0.61414	46	64	1.30593	0.887432		0.496796	0.67954	55	97	1.267	1.63192		0.19774
CNAG_01058	7	22	0.580118	-0.198873	0.999845	0.731738	-0.342815	65	66	14.4904	0.685937	-0.473354	0.819609	0.490141	-0.690084	11	4	0.683468	0.887585	0.40428	0.194065	1.29865	6	4	0.861314	-3.81499	0.000143862	9.45529e-06	-4.42927	29	24	0.74385	-2.30915	0.0338707	0.00190721	-3.10431	42	34	0.740017	-2.73313	0.00201926	0.000221334	-3.69333	68	64	0.932652	-5.14416	5.40354e-07	3.47525e-08
CNAG_01059	0	3	1.73561	2.06189	0.999845	0.234837	1.18799	24	29	5.55431	1.83549	1.74344	0.717328	0.34219	0.949847	2	3	1.9334	-3.44893		0.0744445	-1.78387	8	0	1.42368	-0.730901		0.60768	-0.513388	23	16	1.5416	-1.60902		0.296609	-1.04373	15	6	1.53983	-2.09175		0.174327	-1.35843	10	8	1.33128	0.146959		0.912101
CNAG_01060	46	118	0.413713	0.135462	0.999845	0.743343	0.327429	415	579	89.5705	0.438707	-0.322844	0.801485	0.461792	-0.735899	70	30	1.20673	1.86589		0.122048	1.54623	97	111	1.20606	0.648667	0.905623	0.590686	0.537842	258	187	1.17549	1.35032		0.250668	1.14873	237	162	1.16047	1.26632		0.275177	1.09122	434	463	1.24867	-0.741106	0.823151	0.552836
CNAG_01061	2	6	1.00879	1.1952	0.999845	0.236106	1.18478	35	60	6.22405	1.19414	-0.141672	0.975056	0.905561	-0.11864	3	2	0.594316	1.35642	0.139652	0.0224703	2.28232	1	3	0.573814	0.651152	0.689582	0.256468	1.13478	30	21	0.58554	0.425183	0.737344	0.467754	0.726139	15	13	0.572526	0.281369	0.800926	0.623107	0.491452	22	19	0.544974	1.05683	0.277465	0.0524739
CNAG_01062	6	22	0.701367	0.40016	0.999845	0.56831	0.570543	91	96	21.3286	0.729088	1.24209	0.38681	0.0884512	1.70362	16	23	1.58099	-2.2584		0.153157	-1.42847	13	5	0.899249	0.364613	0.935749	0.685136	0.405464	36	46	0.998958	-0.747161		0.454496	-0.74794	42	54	1.00343	-1.27537		0.203726	-1.27101	102	81	0.943034	-1.07778	0.609084	0.253087
CNAG_01063	19	75	0.490481	-0.168392	0.999845	0.731358	-0.343319	209	208	41.4925	0.522663	-0.0605115	0.975601	0.907831	-0.115775	34	24	1.15873	0.816269		0.481152	0.704452	35	16	1.04768	0.804694	0.821006	0.442446	0.76807	94	85	1.11926	0.0239301		0.982942	0.0213804	130	125	1.09552	-0.227586		0.835431	-0.207742	246	252	1.0279	0.340961	0.916655	0.740111
CNAG_01064	18	83	0.817024	-4.10981	1.56181e-05	4.89902e-07	-5.03023	14	14	32.2139	0.784856	0.652349	0.76398	0.405877	0.83117	37	50	0.551202	1.25321	0.141493	0.0229907	2.27359	146	120	0.609962	-1.96615	0.0145881	0.00126682	-3.22339	5	3	0.598808	-1.64414	0.0683811	0.00603838	-2.74569	70	33	0.705014	-3.62464	5.89345e-06	2.72934e-07	-5.14124	24	10	0.655063	-3.48154	1.59948e-06	1.06762e-07
CNAG_01065	98	537	0.40436	-4.59229	6.00608e-26	6.85078e-30	-11.3569	72	49	272.354	0.386221	1.04084	0.0833025	0.00704045	2.69492	551	263	0.630135	1.98965	0.0353754	0.00159131	3.15749	623	378	0.685118	-4.47486	1.7017e-09	6.51071e-11	-6.53152	29	21	0.634705	-1.10553	0.323253	0.0815429	-1.7418	261	218	0.655366	-3.76141	5.30236e-07	9.50155e-09	-5.73939	115	35	0.666006	-4.66333	5.50132e-11	2.5245e-12
CNAG_01069	1	10	0.936616	-0.187431	0.999845	0.841391	-0.200115	23	21	5.12122	1.00848	0.825757	0.768301	0.412894	0.818812	8	4	0.750187	-0.884449	0.45631	0.238409	-1.17897	10	2	0.59365	0.113831	0.96568	0.84794	0.191747	15	19	0.582452	0.575569	0.626583	0.323063	0.988183	15	28	0.564515	0.942329	0.26271	0.0950633	1.66927	26	34	0.563352	0.61388	0.635801	0.275849
CNAG_01070	0	0	2.13686	1.1416	0.999845	0.593174	0.534242	2	3	2.21742	2.1037	4.77058		0.0233471	2.26771	7	2	1.78358	1.5963		0.370787	0.895001	3	5	1.91246	-0.570366		0.765522	-0.298237	0	0	1.95183	-0.696143		0.721345	-0.356662	1	2	1.78358	-0.0362077		0.983804	-0.0203006	1	3	1.82582	-0.814571		0.655496
CNAG_01071	0	0	1.7266	3.77244	0.433057	0.0288968	2.18489	14	17	4.72368	1.78959	4.66062	0.101393	0.00920624	2.6043	3	4	0.883863	-1.53196		0.0830503	-1.73326	3	2	0.662408	-0.306252	0.922183	0.643844	-0.462331	9	5	0.793743	-2.01138	0.0959279	0.0112756	-2.53404	12	11	0.649729	-0.367538	0.774587	0.571612	-0.565679	28	17	0.655155	-0.929149	0.494066	0.156129
CNAG_01072	0	2	1.62345	1.78733	0.999845	0.270921	1.10095	15	17	3.17217	1.66806	3.11052		0.0622155	1.86476	3	6	1.20592	-0.0837384		0.94464	-0.0694397	1	2	1.40453	-2.25579	0.469632	0.108256	-1.60608	10	5	1.06277	0.114134		0.914477	0.107393	14	6	1.06381	-0.396736		0.709195	-0.372938	19	16	1.10045	-1.24601	0.614735	0.25752
CNAG_01073	1	4	1.07508	1.42156	0.999845	0.186071	1.32229	27	40	5.25771	1.16686	1.47732	0.57074	0.20549	1.26606	5	4	1.07377	-1.88571	0.253562	0.07906	-1.75617	0	3	0.795924	1.4724	0.347495	0.0643244	1.84992	17	12	0.89464	-1.48164	0.352085	0.0976949	-1.65613	19	14	0.929933	-2.4027	0.0534323	0.00977374	-2.58373	25	14	0.808177	-0.219767	0.933327	0.785676
CNAG_01074	1	6	1.05884	1.12248	0.999845	0.289095	1.06011	35	38	9.74856	1.07225	3.16583	0.0443966	0.00315214	2.9525	13	21	1.85156	2.49398		0.177994	1.34696	31	18	1.79755	1.92411	0.719836	0.284438	1.0704	24	11	1.85805	1.30029		0.484043	0.699815	11	6	1.79901	1.49428		0.406195	0.830609	24	24	1.75434	1.93983		0.268843
CNAG_01075	0	5	2.59185	-0.607519	0.999845	0.814678	-0.234396	8	4	1.00303	2.73766	-0.0304522		0.991125	-0.0111235	3	0	1.19342	-0.0759115		0.949282	-0.0636086	1	1	1.07484	-0.0414685	0.992166	0.969224	-0.0385811	3	5	1.08606	-0.11816		0.913363	-0.108797	2	2	1.18706	-1.65092		0.164297	-1.39076	1	3	1.01775	0.50198	0.856686	0.621853
CNAG_01076	0	2	3.10111	-0.0616412	0.999845	0.984141	-0.0198771	1	7	0.692182	3.38251	-1.54615		0.647598	-0.457101	0	0	1.54452	2.02711		0.189367	1.31245	1	1	1.53265	0.949436	0.876183	0.535604	0.619474	1	6	1.60698	0.287513		0.858005	0.178915	1	0	1.51213	0.831485		0.582403	0.549878	11	5	1.53647	0.089566		0.953515
CNAG_01077	0	1	2.31068	1.46073	0.999845	0.527281	0.632162	6	9	1.06002	2.6156	0.68548		0.793264	0.262074	0	1	2.0426	1.44493		0.479319	0.707398	2	3	1.84159	1.94834		0.290071	1.05797	4	1	1.89586	1.36559		0.471341	0.720298	6	3	1.85817	1.30487		0.482533	0.702234	7	6	1.79654	2.06555		0.250253
CNAG_01078	5	9	0.819082	0.436621	0.999845	0.593991	0.533062	57	52	7.96437	0.888734	0.586322	0.83117	0.509429	0.659727	10	6	3.02091	-0.865655		0.774454	-0.286554	10	2	2.77865	0.985008		0.722971	0.354491	36	14	2.84346	0.459842		0.871527	0.161719	24	31	2.9971	-1.10517		0.712317	-0.368746	54	51	2.78754	0.0769525		0.977977
CNAG_01079	1	1	2.90016	-0.0983983		0.972934	-0.0339286	7	6	0.63521	3.21436	-2.26402		0.481218	-0.704345	0	0	6.76668	0.581073		0.931568	0.0858726	1	2	6.76668	-0.636661		0.92504	-0.0940876	4	3	6.76668	-0.551636		0.935027	-0.0815223	1	4	6.6779	1.64774		0.805106	0.246745	6	6	6.65035	2.0123		0.762206
CNAG_01080	0	6	1.24853	-0.354715	0.999845	0.776329	-0.284106	12	8	4.31178	1.2759	1.93376	0.459745	0.129619	1.5156	6	6	2.17057	1.95835		0.366935	0.90223	4	4	2.04403	2.31266		0.257877	1.13142	7	7	2.39275	-0.498089		0.8351	-0.208166	3	6	2.41491	-1.08304		0.653808	-0.448479	7	12	2.03003	1.8499		0.362154
CNAG_01081	2	24	0.79771	-1.77376	0.401221	0.0261775	-2.22357	20	13	15.6701	0.788477	1.64466	0.241541	0.0369911	2.08586	24	20	1.20277	-1.3274	0.490143	0.269757	-1.10362	20	12	1.12492	0.113443	0.982864	0.919674	0.100845	8	10	1.17333	-1.89148	0.36839	0.106948	-1.61206	14	10	1.1286	-0.599391	0.789556	0.595355	-0.531092	18	10	1.12054	-0.187479	0.959355	0.867124
CNAG_01082	10	52	0.578895	0.526035	0.999845	0.363514	0.908689	229	194	26.6118	0.619672	0.0966558	0.968452	0.87605	0.155979	37	9	0.863423	0.305551		0.723427	0.353883	21	11	0.716724	1.7486	0.12395	0.0146992	2.43971	113	67	0.816236	-0.329315	0.8674	0.686613	-0.403456	102	122	0.764876	-0.0469425	0.981651	0.951062	-0.0613727	226	244	0.722715	0.683403	0.69829	0.344351
CNAG_01083	21	66	0.494126	0.114708	0.999845	0.816426	0.232144	256	238	35.7561	0.539456	-0.474575	0.744193	0.379006	-0.87973	21	20	1.66236	1.38979		0.403138	0.836031	40	5	1.61903	0.787938		0.62649	0.486673	117	111	1.84439	-1.13493		0.538327	-0.615345	116	140	1.68278	-0.473756		0.778302	-0.281532	338	349	1.84439	-2.03196		0.270593
CNAG_01084	2	2	1.28888	0.761471	0.999845	0.554655	0.590799	18	24	3.42211	1.40909	0.837395	0.853781	0.552323	0.594283	4	2	1.2748	0.635859		0.617927	0.49879	5	2	1.27947	-0.664011	0.909955	0.603778	-0.518975	6	0	1.28273	-0.613433		0.632491	-0.478224	9	8	1.38482	-2.11891		0.125991	-1.5301	13	18	1.22558	-0.437506	0.905399	0.721108
CNAG_01085	2	4	1.37339	0.0726258	0.999845	0.957827	0.0528807	21	15	2.78953	1.6315	-0.805217		0.621628	-0.493545	3	0	0.9961	1.47451		0.138798	1.48028	5	1	0.932156	1.4233	0.510315	0.126789	1.52689	11	4	1.01741	0.0862474		0.932443	0.0847719	9	12	0.982735	0.0335622	0.989708	0.972756	0.0341519	16	12	0.917298	1.07987	0.594713	0.239105
CNAG_01086	2	12	0.898981	-0.159094	0.999845	0.859531	-0.176971	22	37	6.6114	1.03828	-0.304269	0.937529	0.769483	-0.293051	4	3	2.24748	-2.44433		0.276778	-1.08759	5	5	1.82363	0.332695		0.855241	0.182436	8	17	2.18643	-2.06893		0.344015	-0.946261	16	17	2.24748	-4.07152		0.0700494	-1.81159	27	20	1.83735	-0.665287		0.717285
CNAG_01087	6	20	0.731699	0.0747242	0.999845	0.918658	0.102124	66	75	13.4238	0.791312	0.243292	0.93459	0.758498	0.307454	8	11	1.92698	-2.8616		0.137539	-1.48502	7	7	1.40922	-0.0793996		0.955068	-0.0563431	42	40	1.86087	-2.52401		0.174985	-1.35636	53	53	1.43418	-0.7509		0.600576	-0.523573	81	104	1.384	-0.567777		0.681627
CNAG_01088	3	13	0.916548	-0.463244	0.999845	0.613262	-0.505423	25	32	5.83211	1.00145	0.0835828	0.985988	0.933484	0.083462	4	6	0.948916	1.78182		0.0604165	1.87774	5	4	0.941629	0.682429	0.835402	0.468616	0.724733	16	7	0.945187	0.708311		0.453624	0.749387	15	18	0.898672	1.20694	0.394466	0.179263	1.34303	31	30	0.8819	1.40648	0.413792	0.110751
CNAG_01089	5	7	0.889355	-0.378278	0.999845	0.670589	-0.42534	30	26	6.92197	0.960584	0.439288	0.897037	0.647446	0.457313	8	5	1.76942	-0.994664		0.574019	-0.562143	3	7	1.20287	1.79492	0.526462	0.135648	1.49219	16	9	1.78552	-2.16807		0.224651	-1.21425	26	20	1.43222	-1.13453		0.428275	-0.792148	57	41	1.22122	0.556694	0.868843	0.648498
CNAG_01090	2	8	0.848242	0.481448	0.999845	0.570318	0.567583	37	33	10.831	0.900295	1.46458	0.417641	0.103783	1.62678	8	9	1.06269	0.124929		0.906417	0.117559	7	4	1.00959	-0.30336	0.94877	0.763813	-0.300477	17	23	1.16896	-1.9561		0.0942546	-1.67337	13	21	1.04494	-1.2797	0.449128	0.220701	-1.22467	42	34	0.965658	0.139554	0.968301	0.885093
CNAG_01091	24	122	0.580609	-0.15345	0.999845	0.791555	-0.264292	352	265	43.6607	0.614682	-0.828668	0.534207	0.177619	-1.34812	46	11	2.31546	-3.18187		0.169385	-1.37418	31	15	2.29737	-2.98151		0.194358	-1.2978	141	117	1.96126	-0.978126		0.617974	-0.498724	167	202	1.96887	-1.55349		0.430098	-0.789025	368	364	1.90445	-1.17284		0.537997
CNAG_01092	5	26	0.594317	0.302608	0.999845	0.610634	0.509169	93	91	13.9273	0.680083	-0.133732	0.955718	0.844108	-0.196641	11	7	1.87586	-2.36699		0.207015	-1.26182	15	10	1.4616	-1.28671		0.378675	-0.880341	41	28	1.89914	-3.58903		0.0587828	-1.88981	76	57	1.39259	-0.744069		0.59313	-0.534305	115	140	1.37512	-0.778654		0.571226
CNAG_01093	73	325	0.523582	-0.117596	0.999845	0.822291	-0.224599	1258	521	171.935	0.531847	-0.130031	0.946402	0.806851	-0.24449	149	83	0.716908	0.918951	0.4129	0.199904	1.28182	171	281	0.717737	-2.93039	0.000628363	4.44912e-05	-4.08283	365	334	0.716976	-0.719027	0.622284	0.315928	-1.00286	554	1106	0.716767	2.06815	0.0258038	0.0039093	2.88539	1387	2408	0.718975	-4.89952	1.97773e-10	9.45376e-12
CNAG_01094	8	10	0.916129	-0.0790921	0.999845	0.931202	-0.086333	60	51	12.321	0.983017	-0.0202192	0.994371	0.98359	-0.0205685	4	9	4.77556	0.486605		0.91884	0.101895	6	3	4.77765	-0.532872		0.911193	-0.111534	35	23	4.77766	-0.636179		0.894069	-0.133157	32	32	4.76484	-0.854681		0.857645	-0.179373	64	89	4.79474	-2.89005		0.546673
CNAG_01095	3	15	0.9042	0.193194	0.999845	0.83081	0.213663	56	43	7.57052	0.995953	-0.020944	0.994371	0.983222	-0.0210291	9	3	0.893491	1.43561	0.304431	0.108111	1.60674	12	6	0.850257	0.951659	0.697903	0.263029	1.11926	13	20	0.888477	0.374843	0.865882	0.673103	0.421894	27	23	0.866122	0.235602	0.902608	0.785607	0.272019	43	39	0.817235	1.07812	0.532488	0.187094
CNAG_01096	3	7	1.14562	-0.591031	0.999845	0.60592	-0.515907	26	11	5.15833	1.23526	0.1602	0.971773	0.896812	0.129689	2	5	0.922526	2.2639	0.109673	0.0141269	2.45402	5	0	0.892744	1.82134	0.264062	0.0413344	2.04016	6	3	0.935338	0.884312	0.646118	0.344431	0.945447	15	12	0.88238	1.82144	0.144826	0.0389954	2.06424	16	28	0.892371	1.02512	0.607876	0.250656
CNAG_01097	6	29	0.632554	0.611033	0.999845	0.334056	0.965977	153	106	22.3687	0.664387	1.02325	0.447432	0.123526	1.54014	23	20	1.02447	-0.995061		0.331401	-0.971297	27	12	0.98054	-1.87661	0.318176	0.0556394	-1.91385	49	43	0.854364	-0.227143		0.790345	-0.265862	77	78	0.842052	-0.448056	0.789385	0.594656	-0.532101	172	135	0.848796	-1.01165	0.58974	0.233313
CNAG_01098	5	11	0.876178	-0.23278	0.999845	0.790489	-0.265676	32	44	8.18784	1.0385	-0.893677	0.751532	0.389489	-0.860545	6	1	1.39328	-1.52466		0.273825	-1.0943	8	5	0.995244	0.174375	0.969471	0.860916	0.175208	47	22	1.1016	-1.06948		0.331625	-0.970845	32	21	0.997482	-0.272589		0.78464	-0.273277	51	43	1.01281	-0.944154	0.704328	0.351229
CNAG_01099	10	39	0.604263	-0.267114	0.999845	0.658454	-0.442049	112	92	17.486	0.672852	-0.529966	0.780213	0.430907	-0.787641	21	4	1.05854	0.00919235		0.993071	0.00868401	8	1	0.933817	0.0238461	0.995003	0.979627	0.0255361	43	36	1.29909	-2.33098		0.0727637	-1.79431	59	56	0.962139	-0.750209		0.43555	-0.77973	124	107	0.873061	0.480128	0.838886	0.582362
CNAG_01100	6	46	0.660851	0.294375	0.999845	0.655995	0.445449	109	173	17.7607	0.787282	-1.42663	0.343018	0.0699713	-1.8121	9	3	1.8723	-2.46216		0.188493	-1.31505	7	1	1.38694	-0.704215		0.611629	-0.507749	44	43	1.40106	-0.801236		0.567405	-0.571877	49	13	1.35667	-0.584008		0.666853	-0.43047	235	64	1.44672	-2.20943		0.12671
CNAG_01101	5	32	0.65517	-0.364732	0.999845	0.577733	-0.556699	73	60	15.6279	0.715172	-0.00654348	0.997005	0.9927	-0.00914952	18	6	0.619144	-0.405792	0.685028	0.512205	-0.655408	12	3	0.583222	0.575523	0.75471	0.323741	0.986799	37	15	0.586591	0.270873	0.857078	0.644243	0.461775	45	47	0.580578	0.614811	0.526051	0.289616	1.05896	78	99	0.580983	0.132827	0.945791	0.81916
CNAG_01102	15	211	0.6631	0.830011	0.999845	0.210675	1.25171	782	779	71.7552	0.704806	-1.59154	0.186374	0.0239381	-2.25812	30	11	3.79966	-0.858767		0.821192	-0.226012	56	14	3.79966	-2.07652		0.584721	-0.546502	370	348	3.79966	-1.99149		0.600192	-0.524125	323	349	3.76418	-0.892776		0.81252	-0.237177	1020	749	3.55894	1.31832		0.711066
CNAG_01103	5	15	1.0537	-0.409678	0.999845	0.697425	-0.388799	46	34	7.32735	1.24572	-1.59758	0.562926	0.199683	-1.28245	4	1	0.852926	0.533923	0.701712	0.531321	0.62599	4	3	0.797944	0.461858	0.891487	0.562717	0.578811	13	14	0.793415	0.708828	0.665557	0.371649	0.893389	11	20	0.779807	0.760718	0.567593	0.329302	0.975521	41	55	0.79969	-0.398648	0.855142	0.61813
CNAG_01104	14	19	0.833781	-0.424117	0.999845	0.610985	-0.508667	88	73	27.4056	0.886635	-0.404247	0.897037	0.648438	-0.455934	17	6	2.00305	-0.382946		0.848384	-0.191181	8	12	1.55676	1.67142		0.282977	1.07366	25	32	1.58219	1.30331		0.410087	0.82374	33	50	1.7104	-0.499344		0.770328	-0.291946	50	69	1.55343	0.937199		0.546302
CNAG_01105	8	21	0.83546	-0.0468086	0.999845	0.95532	-0.0560273	64	89	11.0924	0.924981	-0.701953	0.79222	0.447923	-0.758883	11	3	0.82721	-2.00629	0.115833	0.0152926	-2.42537	1	2	0.702	-0.924854	0.603797	0.187686	-1.31746	29	27	0.701007	-0.779314	0.573883	0.266264	-1.11171	43	50	0.765107	-2.86165	0.00171396	0.000183881	-3.74019	74	65	0.678491	-0.16929	0.938916	0.802967
CNAG_01106	24	102	0.368401	0.257054	0.999845	0.485329	0.697758	396	346	55.8549	0.39605	0.179389	0.897725	0.650588	0.452946	66	30	1.11372	0.783653		0.48166	0.703636	65	27	1.11245	-0.413824	0.9418	0.709897	-0.371994	176	175	1.09166	-0.134108		0.902228	-0.122848	213	209	1.01602	0.42212		0.677803	0.415464	464	436	1.05588	-0.617108	0.827666	0.558918
CNAG_01107	7	16	0.667719	0.141131	0.999845	0.832604	0.211363	82	58	16.7165	0.715293	0.713195	0.698711	0.318732	0.997067	16	11	1.88952	-2.05713		0.276285	-1.0887	18	4	1.46487	-0.953777		0.514983	-0.651098	28	13	1.8959	-3.18318		0.0931554	-1.67898	49	35	1.45117	-1.21826		0.401187	-0.839504	77	93	1.36266	-0.159499		0.90682
CNAG_01108	4	6	0.800091	1.63169	0.583989	0.0414122	2.03938	86	92	10.7235	0.850923	1.6104	0.313453	0.0584194	1.89254	14	9	2.02653	-2.85841		0.158394	-1.41049	3	0	1.50035	0.576199		0.700946	0.384044	40	34	2.02653	-3.99114		0.0489021	-1.96944	36	39	1.98671	-3.07814		0.121294	-1.54936	90	89	1.48018	0.219312		0.882212
CNAG_01109	7	8	0.882588	-0.774607	0.999845	0.380132	-0.877654	33	24	9.83035	0.934047	0.410404	0.902193	0.660384	0.439383	8	8	1.63182	-2.45463		0.132522	-1.50423	6	2	1.00073	-0.120637	0.982169	0.904049	-0.120549	21	22	1.15737	-1.56168		0.177229	-1.34934	23	22	0.974295	-0.0360306		0.9705	-0.0369812	35	39	0.974506	-0.445935	0.867762	0.647239
CNAG_01110	4	8	1.08087	-0.436053	0.999845	0.686633	-0.403428	24	27	7.37029	1.14767	0.362969	0.93312	0.751801	0.316265	8	4	1.09703	0.274415		0.802476	0.250145	10	6	1.00252	-0.0163831	0.99734	0.986962	-0.0163419	15	25	1.14794	-1.20342		0.294483	-1.04834	22	21	0.953901	0.372115	0.850925	0.696464	0.390099	28	38	0.916588	1.08319	0.594094	0.2373
CNAG_01111	21	62	0.503914	0.137306	0.999845	0.785253	0.27248	261	225	37.2367	0.547198	-0.387987	0.812041	0.478298	-0.709043	39	10	1.66653	1.39022		0.404169	0.834198	27	14	1.69893	-0.0699629		0.967152	-0.0411805	146	114	2.00316	-1.51918		0.448217	-0.758391	143	144	1.51247	2.27861		0.131926	1.50655	310	280	1.51528	1.76007		0.245418
CNAG_01112	6	41	0.778078	0.31531	0.999845	0.685299	0.405243	132	130	21.5866	0.806165	0.633323	0.781218	0.432102	0.7856	14	23	1.94504	-1.05113		0.588911	-0.540415	27	7	1.73433	-1.2745		0.462422	-0.734864	55	38	1.95127	-2.1773		0.264492	-1.11584	87	53	1.54686	-0.461318		0.765528	-0.298229	181	126	1.5728	-1.09965		0.484449
CNAG_01113	17	15	0.858987	-1.78839	0.536724	0.0373448	-2.08197	34	34	22.7487	0.903876	-0.606759	0.827669	0.502039	-0.671285	19	4	3.26766	0.581083		0.858858	0.177828	11	0	3.24586	0.869469		0.788799	0.26787	7	14	3.04121	2.58923		0.394558	0.85138	40	36	2.98598	3.11831		0.296339	1.04432	51	38	3.10434	1.00316		0.746585
CNAG_01114	2	4	0.976396	-0.214982	0.999845	0.825732	-0.220179	15	13	6.21089	1.02401	1.59061	0.441897	0.120346	1.55332	11	3	2.76973	0.581084		0.833825	0.209798	6	6	2.57502	1.8078		0.482645	0.702055	11	18	2.40482	4.35124		0.0703913	1.80938	14	14	2.42777	3.18863		0.189047	1.3134	31	46	2.43656	2.59173		0.287473
CNAG_01115	26	103	0.396477	-0.00467867	0.999845	0.990585	-0.0118006	295	345	49.5238	0.428447	-0.180809	0.906766	0.673017	-0.42201	57	22	0.99994	-1.29106	0.408083	0.196654	-1.29114	52	19	0.710981	1.21201	0.421771	0.0882513	1.7047	148	148	0.827459	-1.12403	0.46845	0.174334	-1.35841	224	188	0.76821	-0.802668	0.532789	0.29609	-1.04485	404	390	0.736369	-0.513517	0.796327	0.485575
CNAG_01116	2	2	1.16503	0.778132	0.999845	0.504194	0.667906	18	23	6.31404	1.21369	2.07807	0.383931	0.0868614	1.71219	5	7	0.75871	0.785287	0.521235	0.300655	1.03503	9	4	0.686639	1.04504	0.511667	0.128018	1.52196	14	9	0.679665	1.39621	0.210379	0.039951	2.05426	8	16	0.661914	1.84692	0.0329406	0.00526651	2.79026	19	20	0.669206	0.977132	0.476511	0.144252
CNAG_01117	318	966	0.367459	-0.0156261	0.999845	0.96608	-0.0425249	3385	3406	554.214	0.371299	-0.311204	0.762135	0.401946	-0.83815	606	195	0.70562	0.565129	0.613532	0.423191	0.800897	348	115	0.649144	0.496725	0.82189	0.444152	0.765201	1530	1188	0.676487	-0.0704285	0.967365	0.917083	-0.104109	2161	2083	0.651482	0.023681	0.989659	0.971004	0.0363494	4124	4295	0.644792	-0.178304	0.932186	0.782142
CNAG_01118	2	2	1.2954	0.332258	0.999845	0.797571	0.256492	7	24	4.17086	1.43014	0.615149	0.904954	0.667101	0.430131	3	2	2.18562	1.41656		0.516902	0.648128	1	0	2.07924	0.92493		0.656435	0.444841	6	7	2.02518	1.5627		0.440333	0.771632	9	9	2.15824	-0.0483504		0.982127	-0.0224027	17	11	1.96213	1.72387		0.379633
CNAG_01119	46	128	0.35974	-0.392307	0.999845	0.275479	-1.09053	337	378	96.8048	0.371024	0.708573	0.306962	0.0561617	1.90978	129	74	0.961414	-3.0935	0.0316298	0.00129242	-3.21766	65	41	0.865265	0.158173	0.969215	0.854953	0.182802	149	121	0.891336	-2.44757	0.0683811	0.00603358	-2.74595	292	239	0.879254	-2.22321	0.0611433	0.0114546	-2.52852	393	344	0.866519	-0.979478	0.615976	0.258325
CNAG_01120	60	249	0.294574	0.287976	0.999845	0.32827	0.977604	926	933	137.413	0.313581	-0.188981	0.85117	0.546739	-0.602654	124	58	0.612986	1.08856	0.249475	0.0757612	1.77583	87	29	0.599576	0.243601	0.935125	0.684531	0.406288	378	375	0.605984	0.14304	0.916454	0.813397	0.236045	499	582	0.588454	0.247163	0.837257	0.674471	0.42002	1082	1199	0.572493	0.720154	0.559511	0.208419
CNAG_01121	2	3	1.22257	-1.15272	0.999845	0.345748	-0.942868	6	7	3.58163	1.24899	1.36136	0.658005	0.275726	1.08997	4	5	1.65777	-2.26045		0.172709	-1.36355	8	5	0.99843	1.044	0.731307	0.295726	1.04564	3	1	1.27024	-1.81847		0.152259	-1.4316	5	3	1.15164	-1.55353		0.177348	-1.34897	12	4	1.01484	-0.202278	0.951033	0.842011
CNAG_01122	0	0	2.70784	-0.183881	0.999845	0.94586	-0.0679068	1	1	0.815252	2.70787	2.82508		0.296816	1.04329	1	1	6.76564	-0.870592		0.897612	-0.128679	1	1	6.76564	-2.08833		0.757575	-0.308667	0	0	6.66638	0.950599		0.886609	0.142596	0	0	6.70416	-0.30227		0.964038	-0.0450869	0	3	6.76564	-2.90216		0.667956
CNAG_01123	3	7	0.894966	0.326332	0.999845	0.715387	0.364631	37	31	5.59444	1.07481	-0.366635	0.926694	0.733016	-0.341116	5	1	2.04245	-2.47131		0.226289	-1.20997	1	2	1.62937	-1.04179		0.522574	-0.639382	12	9	1.70736	-1.75809		0.303146	-1.02971	10	25	1.61631	-1.25387		0.437892	-0.775759	53	43	1.59947	-1.37572		0.389728
CNAG_01124	0	2	2.03627	-0.3641	0.999845	0.858089	-0.178807	5	2	1.07254	2.21088	0.823845		0.709422	0.372633	1	1	1.09156	0.860986		0.430249	0.788766	1	0	0.931057	1.79528	0.310602	0.0538285	1.92821	4	1	1.0199	0.382613		0.70755	0.375149	4	1	1.05698	-0.47127	0.823084	0.655694	-0.445866	4	1	0.924822	1.16874	0.557527	0.206323
CNAG_01125	11	49	0.498234	0.06907	0.999845	0.889743	0.13863	160	148	26.1282	0.547397	-0.0353009	0.989043	0.948581	-0.0644887	32	9	0.921891	1.02073	0.489149	0.268201	1.10722	25	9	0.849347	0.843767	0.75471	0.3205	0.99343	67	61	0.860811	0.714761	0.690713	0.40635	0.830334	77	102	0.821315	1.12251	0.383893	0.171711	1.36673	200	160	0.820861	0.731577	0.720583	0.372805
CNAG_01126	25	103	0.471361	-0.0160935	0.999845	0.972763	-0.0341426	326	299	46.4035	0.509324	-0.605293	0.610663	0.234666	-1.18843	47	13	1.46715	-0.44768		0.760263	-0.305135	27	9	1.13532	0.918139	0.805368	0.418684	0.808706	135	133	1.23301	-0.21035		0.864539	-0.170599	157	161	1.17404	-0.0815775		0.944604	-0.0694842	306	360	1.24348	-1.196	0.691253	0.336139
CNAG_01127	1	3	1.36943	0.906843	0.999845	0.50784	0.662204	20	19	5.37251	1.40726	2.37028	0.39547	0.0921198	1.68432	4	8	0.660913	2.08787	0.0353754	0.0015827	3.15908	3	6	0.635117	1.86407	0.0350169	0.00333547	2.935	24	17	0.653619	1.17939	0.294231	0.0711681	1.8044	17	9	0.647239	0.908941	0.367691	0.160219	1.40434	22	24	0.623089	1.92716	0.0194094	0.00198203
CNAG_01128	10	32	0.660127	-0.244054	0.999845	0.711601	-0.369707	98	87	34.3867	0.66725	1.92879	0.0520454	0.00384442	2.89065	41	55	4.09323	2.26394		0.5802	0.553093	29	6	4.00096	1.92989		0.629552	0.482357	44	23	4.04138	1.61371		0.689674	0.399297	53	61	4.01122	1.41374		0.724504	0.352445	112	120	4.12362	-0.0720407		0.986061
CNAG_01129	0	25	1.06472	1.02939	0.999845	0.333634	0.966819	84	104	10.993	1.10676	0.857164	0.783881	0.438647	0.774481	16	7	1.22344	0.806753		0.509632	0.659411	15	2	1.1819	-0.0301022	0.995003	0.979681	-0.0254693	48	43	1.17303	0.143256		0.9028	0.122125	55	51	1.25509	-1.05192	0.637828	0.401963	-0.83812	129	123	1.04992	2.02261	0.281651	0.0540488
CNAG_01130	16	61	0.406631	0.129886	0.999845	0.749409	0.319418	222	202	43.1709	0.433713	0.649688	0.467169	0.134142	1.49797	62	23	1.55091	-3.03441		0.0504014	-1.95654	44	15	0.805936	0.407878	0.911608	0.612791	0.506093	135	132	0.993718	-1.84667		0.0631204	-1.85834	139	142	0.905691	-1.60329	0.227257	0.0766867	-1.77024	301	268	0.808298	-0.46444	0.83109	0.565569
CNAG_01131	0	6	1.74893	0.457833	0.999845	0.793492	0.261778	18	14	3.98521	1.77765	2.15408	0.599133	0.225606	1.21176	1	9	0.953332	-0.778369	0.609364	0.414231	-0.816471	12	7	0.806656	0.191263	0.956176	0.812575	0.237106	2	10	0.97224	-2.06125	0.189335	0.0339976	-2.1201	16	16	0.821012	-0.610744	0.684855	0.456942	-0.743892	10	7	0.780714	0.576033	0.782155	0.460619
CNAG_01132	4	6	0.857695	-0.111237	0.999845	0.89681	-0.129693	33	21	8.60844	0.984198	0.0452299	0.991922	0.963345	0.0459561	5	3	1.0525	1.92451		0.0674731	1.82851	3	1	1.10425	-0.164594	0.974489	0.881511	-0.149054	10	8	1.05115	0.818257		0.436307	0.778444	20	27	1.13825	-0.959486	0.636355	0.399258	-0.842947	31	62	1.03136	0.438937	0.880359	0.670407
CNAG_01133	3	2	1.40281	-0.844604	0.999845	0.547119	-0.602082	12	8	2.75642	1.56296	-0.329492		0.833033	-0.210813	3	1	1.30467	2.57318		0.0485768	1.97229	1	0	1.25622	2.29784	0.358131	0.0673734	1.82918	4	3	1.34485	0.940731		0.484235	0.699508	6	2	1.26334	1.71156	0.388487	0.175484	1.35479	15	9	1.23099	2.38412	0.277792	0.0527771
CNAG_01134	3	21	0.731908	-0.0183373	0.999845	0.980012	-0.0250541	45	64	10.9554	0.784597	0.612514	0.78264	0.434995	0.780673	13	9	0.694201	-0.893812		0.197906	-1.28754	7	5	0.642488	-1.40018	0.208133	0.0293085	-2.17931	17	19	0.77618	-2.77407	0.0100882	0.000351568	-3.574	42	23	0.703701	-2.61973	0.00181296	0.000197033	-3.72279	42	49	0.683378	-2.79395	0.000522694	4.34291e-05
CNAG_01135	1	5	1.25916	-0.768107	0.999845	0.541851	-0.610016	4	13	3.15338	1.42587	-0.0253729		0.985803	-0.0177947	3	1	0.552277	-0.487212	0.580399	0.377676	-0.882187	1	2	0.519081	-0.223098	0.931859	0.667346	-0.429793	3	7	0.512269	0.527887	0.61392	0.302781	1.03049	5	8	0.506272	0.984987	0.177322	0.0517068	1.94557	10	16	0.505177	0.850347	0.380812	0.0923238
CNAG_01136	16	49	0.454269	-0.156817	0.999845	0.729938	-0.345208	172	134	32.7496	0.499641	-0.0366517	0.98791	0.941523	-0.0733561	33	13	1.71899	-1.41291		0.41111	-0.821941	28	11	1.28932	-0.640457	0.913665	0.619372	-0.496741	69	52	1.20181	0.230206		0.848095	0.19155	88	107	1.14841	0.515391		0.653586	0.448786	197	209	1.14833	0.11179		0.922449
CNAG_01137	122	768	0.457976	0.431715	0.999845	0.345855	0.94266	2601	2707	319.312	0.464473	-0.533808	0.628313	0.250442	-1.14928	299	95	0.545568	-0.273947	0.769592	0.615575	-0.502131	210	88	0.536795	-1.02046	0.324276	0.0572979	-1.90103	1283	1017	0.527143	-0.0679875	0.960017	0.897379	-0.128974	1388	1397	0.529346	-0.812738	0.313708	0.124695	-1.53536	3360	3010	0.522558	-0.309211	0.823607	0.554034
CNAG_01138	27	128	0.49441	0.0865629	0.999845	0.861014	0.175083	431	356	49.8282	0.555182	-1.56158	0.062677	0.00491215	-2.81274	31	6	2.01257	-1.85825		0.355839	-0.923323	33	18	1.42268	3.6159	0.0984516	0.0110346	2.5416	199	164	1.73487	-0.562867		0.745602	-0.324443	266	268	1.971	-2.07114		0.293347	-1.05081	484	586	1.57779	-0.44842		0.776252
CNAG_01139	0	1	2.73919	-1.44569		0.597652	-0.52778	1	1	0.604647	2.87461	0.422179		0.883239	0.146865	1	0	3.92925	0.581082		0.882433	0.147886	0	0	3.75131	2.35377		0.530361	0.627455	1	3	3.88653	1.09096		0.778939	0.280702	0	0	3.92925	-1.0461		0.790059	-0.266234	2	1	3.71317	2.28586		0.538152
CNAG_01140	14	60	0.513786	-0.759987	0.999845	0.13909	-1.47919	123	92	23.5346	0.568849	-0.599724	0.672527	0.291756	-1.05428	26	8	0.611298	-2.04363	0.0250429	0.000828511	-3.34309	13	6	0.512936	0.452828	0.782929	0.377335	0.882817	48	39	0.537538	-1.38121	0.0905096	0.0101843	-2.56951	82	74	0.5138	-0.0759104	0.944826	0.882545	-0.147743	197	171	0.510327	0.148779	0.927315	0.77064
CNAG_01141	5	13	0.769901	-0.615939	0.999845	0.423697	-0.800024	28	35	9.03749	0.856278	-0.0254795	0.994371	0.976262	-0.0297561	6	6	1.74262	-2.05045		0.239336	-1.17665	4	2	1.36245	-1.58831	0.675069	0.243706	-1.16577	15	30	1.47029	-2.05977		0.161235	-1.40093	22	25	1.23433	-0.999751		0.417966	-0.809955	68	45	1.15729	-0.248228		0.830165
CNAG_01142	10	42	0.493628	0.358591	0.999845	0.467569	0.72644	168	162	23.4678	0.535097	0.407954	0.789821	0.445826	0.762392	33	14	1.67549	-1.41644		0.397894	-0.845389	26	9	1.07225	1.0733	0.751513	0.316837	1.00098	77	71	1.1889	-0.262532		0.825233	-0.220819	77	85	1.07575	0.600147		0.57692	0.557889	206	195	1.08836	-0.0247625	0.99709	0.981848
CNAG_01143	2	2	1.37247	0.146812	0.999845	0.914813	0.106969	14	14	2.18353	1.59523	-0.19043		0.904979	-0.119375	2	1	0.835422	0.783174		0.348523	0.937459	4	0	0.830339	-0.361923	0.929917	0.662928	-0.435874	6	1	0.792257	0.371488		0.639142	0.468898	13	8	0.762812	0.654119	0.629511	0.391163	0.857511	22	20	0.774277	-0.101908	0.97236	0.895288
CNAG_01144	3	45	0.814613	0.0963725	0.999845	0.905826	0.118305	98	109	14.4582	0.868685	-0.211414	0.946515	0.807717	-0.243372	16	7	1.24557	-1.49219	0.447862	0.23092	-1.19799	11	4	0.737013	1.52587	0.251308	0.0384203	2.07034	90	73	0.959946	-1.31982	0.458967	0.169164	-1.37489	61	74	0.823206	-0.618566	0.681622	0.452405	-0.751411	139	131	0.743186	0.50485	0.797477	0.496945
CNAG_01145	2	10	0.854326	-0.351678	0.999845	0.6806	-0.411644	30	16	8.28307	0.936473	0.550108	0.856005	0.556918	0.587426	9	3	1.75598	2.86419		0.102867	1.63111	2	2	2.15245	-0.629449	0.94877	0.769955	-0.292434	6	7	1.78287	1.43833		0.419811	0.806749	15	20	1.82086	0.608445		0.738264	0.334153	27	38	1.66454	2.77035	0.386974	0.0960467
CNAG_01146	18	37	0.541544	0.0291215	0.999845	0.957114	0.0537749	156	167	30.4974	0.582145	0.0287535	0.991493	0.960607	0.0493923	25	17	0.699336	-0.255271	0.837722	0.715097	-0.36502	10	3	0.619067	0.210564	0.94877	0.733757	0.340132	78	65	0.687409	-1.22091	0.308139	0.0757152	-1.77611	115	113	0.716146	-2.0887	0.0236861	0.00353886	-2.91659	206	251	0.615509	-0.458466	0.78024	0.456359
CNAG_01147	5	18	0.76895	-0.778927	0.999845	0.311072	-1.01298	31	37	9.32861	0.847497	-0.15221	0.959964	0.857467	-0.1796	6	7	0.817618	-0.259177	0.862109	0.751251	-0.31699	13	1	0.702365	-0.222088	0.94877	0.75185	-0.316201	27	15	0.63942	1.38882	0.177353	0.0298556	2.172	13	23	0.628118	1.4367	0.098244	0.0221775	2.28731	39	45	0.633963	0.723968	0.609084	0.253466
CNAG_01148	69	296	0.468728	-0.00544277	0.999845	0.990735	-0.0116118	914	856	136.907	0.479735	-0.25603	0.875921	0.593556	-0.53369	184	41	6.76668	0.581073		0.931568	0.0858726	89	36	6.66883	2.25367		0.735408	0.337941	438	386	6.76668	-0.551636		0.935027	-0.0815223	507	627	6.66657	1.91756		0.773623	0.287639	1355	1282	6.68935	1.01135		0.879827
CNAG_01149	13	44	0.545819	-0.643054	0.999845	0.238739	-1.17815	99	89	18.3578	0.612452	-0.646358	0.672084	0.291261	-1.05536	13	11	0.716105	-1.25903	0.252976	0.0787195	-1.75816	13	12	0.571283	-0.236572	0.934383	0.678796	-0.414106	36	31	0.634965	-1.48332	0.135264	0.0194881	-2.33606	81	92	0.606001	-1.49606	0.0692794	0.0135592	-2.46873	122	125	0.565074	-0.829372	0.473084	0.14218
CNAG_01150	40	190	0.345737	0.20001	0.999845	0.562925	0.578502	647	619	92.1009	0.378347	-0.730915	0.299058	0.0533761	-1.93187	58	31	0.872843	-0.505698		0.56234	-0.579369	72	25	1.00406	-2.64168	0.0792112	0.00851341	-2.631	295	260	1.01162	-2.61377		0.00977323	-2.58375	364	374	0.746438	-0.130296	0.936573	0.861427	-0.174558	640	738	0.998401	-3.43057	0.0063286	0.00059023
CNAG_01151	6	4	1.16082	-1.27373	0.999845	0.272524	-1.09727	18	13	8.70533	1.18848	0.786372	0.83117	0.50819	0.661659	4	10	0.759587	3.65321	0.000538746	1.51333e-06	4.80947	6	2	0.776944	1.52495	0.297149	0.0496742	1.96276	6	9	0.780223	1.50044	0.250927	0.0544688	1.92309	21	12	0.775935	1.16214	0.329716	0.134204	1.49773	19	27	0.745483	3.21664	0.000201066	1.5972e-05
CNAG_01152	191	1104	0.348261	0.222028	0.999845	0.523778	0.637532	3252	3560	846.196	0.349259	1.57682	0.000163475	6.33901e-06	4.51475	1552	791	1.89743	-0.979174		0.605818	-0.516052	826	164	1.41779	1.07791		0.44709	0.760275	1467	1472	1.91737	-2.18203		0.255107	-1.13803	2277	1623	1.47998	-0.220885		0.881358	-0.149248	3766	3309	1.39144	0.896451		0.519406
CNAG_01153	53	167	0.400612	0.140278	0.999845	0.726218	0.35016	715	563	103.315	0.418274	-0.123952	0.937295	0.766969	-0.296341	119	35	2.63135	-0.484871		0.853804	-0.184267	48	21	2.39971	-0.0766374		0.974523	-0.0319362	394	346	2.46744	-0.532553		0.829118	-0.215833	352	399	2.4028	-0.508113		0.832523	-0.211467	876	725	2.33494	-0.0654904		0.977624
CNAG_01154	2	11	0.908988	-0.123452	0.999845	0.891969	-0.135813	26	31	5.29274	1.02468	0.0224185	0.994371	0.982545	0.0218786	4	4	0.808421	1.11848	0.371124	0.166501	1.38353	15	1	0.797175	0.0944022	0.982169	0.905734	0.118421	18	12	0.746464	1.61438	0.17905	0.0305643	2.1627	24	15	0.737326	1.60705	0.119184	0.0292898	2.17956	25	26	0.740306	1.02144	0.510357	0.167664
CNAG_01155	27	329	0.62283	0.6903	0.999845	0.267721	1.10833	1180	1082	127.051	0.635591	-0.458395	0.808249	0.47078	-0.721211	113	35	1.48238	0.392948		0.790948	0.265079	85	44	1.36549	0.368548	0.950745	0.787237	0.269901	578	464	1.53964	-1.11348		0.469553	-0.723206	493	636	1.38849	-0.351678		0.800051	-0.253281	1288	1269	1.37092	-0.520899		0.703973
CNAG_01156	26	98	0.584795	-0.280241	0.999845	0.631787	-0.479213	234	279	50.4653	0.604782	-0.0168708	0.994371	0.977745	-0.0278957	55	28	1.33756	0.251085		0.851097	0.187719	37	10	1.33328	-0.930447	0.847659	0.485261	-0.697866	132	134	1.39379	-1.25856		0.366538	-0.902977	131	99	1.38419	-1.69108		0.221816	-1.22171	274	236	1.15569	1.19927		0.299403
CNAG_01157	7	11	0.808876	-0.283056	0.999845	0.726386	-0.349937	41	48	9.37632	0.900888	-0.242667	0.941691	0.78765	-0.269364	10	3	1.88358	2.99205		0.112175	1.58849	9	2	1.71063	3.11604	0.361543	0.0685193	1.82158	34	34	1.68086	3.5935		0.0325254	2.13789	26	28	1.6555	3.5515		0.0319314	2.14527	58	56	1.59119	6.40535	0.000673013	5.68545e-05
CNAG_01158	28	77	0.443159	-0.205937	0.999845	0.642145	-0.464702	244	248	43.0483	0.481161	-0.412973	0.751707	0.390736	-0.858284	47	14	2.37403	1.10271		0.642297	0.464489	41	12	2.43666	-0.627559		0.796756	-0.257548	121	111	2.39204	-0.194776		0.935103	-0.0814267	167	160	2.28618	0.634822		0.78126	0.277678	343	369	2.59917	-2.36511		0.36285
CNAG_01159	11	10	0.839566	-0.711672	0.999845	0.396624	-0.847667	40	50	11.5111	0.905749	-0.286805	0.93312	0.751509	-0.31665	10	6	1.24061	-0.760638	0.707494	0.539801	-0.613114	7	7	0.957917	0.674574	0.844886	0.481302	0.704209	20	15	0.943783	1.14001	0.532237	0.22708	1.20792	35	25	0.926939	1.23785	0.397361	0.181741	1.33541	51	56	0.910878	1.77458	0.273244	0.0513907
CNAG_01161	3	8	0.90007	0.15635	0.999845	0.862095	0.173708	26	39	7.92847	0.972293	0.767811	0.779575	0.429708	0.789692	5	7	1.01231	-0.0558248		0.956022	-0.0551461	2	2	1.18895	-2.41055	0.2692	0.0426151	-2.02746	16	7	1.00626	-1.13082		0.261102	-1.12379	17	16	0.918408	-0.4814	0.792771	0.600162	-0.524168	37	49	0.892942	-0.314614	0.90798	0.724587
CNAG_01162	4	13	0.848062	0.493805	0.999845	0.560382	0.582275	36	87	8.83339	0.987411	-0.549803	0.869451	0.577656	-0.556812	5	3	2.17086	-3.18512		0.142318	-1.46721	9	3	1.74745	-0.655847		0.707425	-0.375316	30	24	2.10781	-2.81145		0.182261	-1.33383	36	24	1.94262	-2.50462		0.197293	-1.2893	44	29	1.83029	-2.23539		0.221961
CNAG_01163	4	9	0.930896	-0.522866	0.999845	0.574334	-0.56168	20	30	5.79184	1.00273	0.359947	0.922992	0.71962	0.358966	7	5	1.46301	-0.217349		0.881899	-0.148563	6	0	1.3323	-0.401695	0.94877	0.763029	-0.301506	9	7	1.31323	-0.0864646		0.947504	-0.0658414	16	20	1.31283	-0.579412		0.658963	-0.441346	35	32	1.26348	-0.191855		0.879308
CNAG_01164	56	227	0.333612	0.161433	0.999845	0.62846	0.483895	889	681	115.333	0.351874	-0.189436	0.875159	0.590327	-0.538363	120	50	0.658146	1.19661	0.236112	0.0690421	1.81814	105	45	0.629085	0.745985	0.666437	0.235691	1.18583	387	334	0.656804	0.0920034	0.955295	0.888599	0.140077	404	427	0.668263	-0.632837	0.582962	0.343645	-0.946988	977	1053	0.626219	0.0382266	0.992919	0.951325
CNAG_01165	3	10	0.829012	0.0507839	0.999845	0.951153	0.0612583	31	38	7.46913	0.900328	0.697187	0.783881	0.438712	0.77437	8	6	0.533593	-0.0571033	0.949447	0.914776	-0.107017	22	7	0.498453	-0.137322	0.95073	0.782934	-0.275497	24	11	0.49009	0.430433	0.672706	0.379795	0.878273	42	20	0.477558	1.10229	0.0950382	0.0209894	2.30818	54	31	0.476214	0.900938	0.295161	0.0585077
CNAG_01166	3	6	0.984094	-0.0649713	0.999845	0.947361	-0.0660214	20	28	5.3841	1.11714	0.0121191	0.996925	0.991344	0.0108483	5	2	2.15692	-2.44865		0.25627	-1.13525	1	0	1.73002	0.081129		0.962597	0.0468949	19	2	1.6726	1.08334		0.517181	0.647697	16	22	1.78795	-0.894691		0.616793	-0.5004	23	46	1.71252	-0.50382		0.768607
CNAG_01167	15	17	1.00798	-0.510036	0.999845	0.612858	-0.505998	81	76	16.3111	1.05461	-0.51837	0.88865	0.623052	-0.49153	25	1	2.21567	-0.357389		0.871857	-0.161301	12	1	1.83529	1.47334		0.4221	0.802783	27	41	1.84386	1.39866		0.448122	0.75855	48	61	1.89808	0.0878743		0.963074	0.0462963	100	97	1.89541	-0.286207		0.879976
CNAG_01168	47	59	0.606517	-0.682319	0.999845	0.260598	-1.12498	224	227	58.2809	0.626545	-0.305265	0.889928	0.626102	-0.48722	59	23	0.944199	0.145055	0.929238	0.877904	0.153627	33	6	0.843226	0.203113	0.956018	0.809651	0.240876	97	85	0.804292	1.29469	0.369071	0.107456	1.60973	184	167	0.788285	1.51579	0.183509	0.0544933	1.92289	295	384	0.782009	1.52518	0.272395	0.0511363
CNAG_01169	14	24	0.713826	-0.84061	0.999845	0.238951	-1.17761	64	65	14.1463	0.78067	-0.681932	0.746358	0.382379	-0.873521	17	4	0.803039	-0.758862	0.55063	0.344665	-0.944988	6	2	0.687469	0.0733814	0.982864	0.914994	0.106741	35	22	0.706514	-0.397151	0.818785	0.574029	-0.562127	63	36	0.67208	0.359923	0.788054	0.592279	0.535536	63	92	0.66344	0.543618	0.755741	0.412562
CNAG_01170	108	287	0.38205	-0.227558	0.999845	0.551427	-0.595623	1029	840	190.198	0.394843	-0.49062	0.581923	0.214026	-1.24257	170	54	2.54908	-1.86161		0.465201	-0.730309	97	53	2.3501	-0.723752		0.758108	-0.307966	415	371	2.33605	-0.542651		0.816309	-0.232294	524	655	2.16028	1.02698		0.634507	0.475393	1303	1405	2.23878	-0.635428		0.776542
CNAG_01171	0	1	2.0407	-0.872365	0.999845	0.669028	-0.427483	1	2	1.5315	2.02984	2.2175		0.274634	1.09245	1	2	1.21818	0.453557		0.709652	0.372324	1	0	1.02647	1.38352	0.59623	0.177711	1.34784	4	0	1.11122	0.187856		0.865754	0.169054	10	3	1.01407	1.29782	0.422354	0.200611	1.27981	2	7	0.997192	1.47398	0.46698	0.139372
CNAG_01172	10	38	0.65698	-0.755787	0.999845	0.249981	-1.1504	75	68	13.2624	0.752045	-1.12087	0.471778	0.13611	-1.49044	13	3	0.905309	1.86475		0.0394186	2.05979	20	5	0.896401	0.816189	0.772042	0.36255	0.910518	34	21	0.89928	0.846889		0.346325	0.941741	59	56	0.883515	0.698555	0.661755	0.429146	0.790654	116	100	0.86566	0.811811	0.702718	0.34835
CNAG_01173	7	24	0.760142	0.212984	0.999845	0.779332	0.280189	77	107	13.4427	0.809447	0.258988	0.932305	0.749001	0.319957	25	4	0.827579	-0.183239		0.824769	-0.221415	13	10	0.791909	-0.982618	0.645758	0.214672	-1.24082	67	36	0.843282	-1.46917		0.0814721	-1.74221	58	58	0.785274	-1.30398	0.266138	0.0968057	-1.66054	108	105	0.721723	-0.454958	0.810594	0.528448
CNAG_01174	12	70	0.520465	0.705165	0.999845	0.175458	1.35487	305	314	42.8497	0.553978	0.178875	0.931562	0.746777	0.322892	48	14	1.06276	0.77285		0.467098	0.727209	25	32	0.976332	0.824974	0.792353	0.398126	0.844972	174	96	0.994491	0.554581		0.577081	0.557653	128	73	0.970531	0.557246		0.565855	0.574166	241	210	1.08733	-1.48976	0.513684	0.170655
CNAG_01175	4	8	0.807328	0.629101	0.999845	0.43584	0.779238	47	56	8.03352	0.915619	0.250457	0.940861	0.78444	0.273538	8	3	1.30941	-0.474366		0.717146	-0.362276	9	2	1.11513	-0.113918	0.982864	0.918633	-0.102156	26	26	1.13088	-0.223599		0.843263	-0.197721	26	30	1.10674	-0.404085		0.715026	-0.365114	40	58	1.05741	0.135397	0.972892	0.898112
CNAG_01177	4	17	0.849113	0.162821	0.999845	0.847935	0.191754	62	54	9.37885	0.927735	0.0329281	0.993906	0.971687	0.035493	14	2	1.00097	1.17634		0.239916	1.1752	7	1	1.04339	-0.637779	0.878825	0.541031	-0.611255	30	22	1.05498	-0.681976		0.517999	-0.646433	40	26	1.1614	-2.05451		0.0768946	-1.769	73	85	1.08008	-1.83165	0.374866	0.0899147
CNAG_01178	4	23	0.719641	-0.0333066	0.999845	0.963085	-0.0462822	53	71	10.8445	0.806105	-0.194116	0.946875	0.809705	-0.240807	7	7	1.48166	1.79564		0.225547	1.21191	3	2	1.47008	0.697807	0.917987	0.635021	0.474672	30	33	1.4868	0.615078		0.679099	0.413693	32	35	1.40226	1.21661		0.385612	0.867602	68	68	1.36575	1.71744	0.559662	0.208572
CNAG_01179	9	34	0.616706	-0.55205	0.999845	0.370702	-0.89516	85	63	15.0051	0.706374	-0.805258	0.632618	0.254291	-1.13999	15	3	1.64294	-4.5645		0.00546515	-2.77826	5	4	0.938653	-1.35669	0.548972	0.148356	-1.44536	40	43	0.982231	-1.67735		0.0876922	-1.7077	41	59	0.848922	-0.400134		0.637396	-0.471343	91	117	0.836153	-0.464598	0.83687	0.578458
CNAG_01180	2	5	1.34406	-0.608571	0.999845	0.650704	-0.452785	12	13	2.20017	1.59783	-0.960529		0.547742	-0.601147	3	0	0.491415	-0.451837	0.562871	0.357855	-0.91946	1	1	0.459212	-0.379662	0.799477	0.408369	-0.826768	9	17	0.448552	0.620311	0.454071	0.166689	1.38292	20	16	0.44459	0.656751	0.339146	0.13962	1.47721	12	18	0.442657	0.609537	0.511317	0.168513
CNAG_01181	114	390	0.314776	0.0105932	0.999845	0.973154	0.0336531	1294	1324	211.525	0.329852	-0.677915	0.252739	0.0398588	-2.05521	172	59	1.52731	0.218272		0.886359	0.142913	96	53	1.37914	0.502251	0.942476	0.715725	0.364178	548	490	1.44661	-0.262367		0.85608	-0.181367	920	904	1.51802	-1.34408		0.375933	-0.885415	1616	1743	1.35985	0.0607994		0.964338
CNAG_01182	20	63	0.43311	0.261764	0.999845	0.54559	0.604381	277	243	42.7036	0.477514	-0.208421	0.903056	0.662496	-0.43647	40	13	1.8395	-0.454758		0.80474	-0.247218	27	12	1.32265	1.68592	0.624446	0.202432	1.27465	133	99	1.4292	0.489381		0.732037	0.342417	164	159	1.34656	0.888961		0.509144	0.660171	327	320	1.29998	1.36229	0.653771	0.294668
CNAG_01183	5	22	0.732454	0.224553	0.999845	0.759166	0.306576	57	97	9.96977	0.822687	-0.299037	0.922235	0.716241	-0.363488	11	4	1.14585	-2.56991	0.14591	0.0249103	-2.24279	15	2	0.82821	0.000528601	0.999491	0.999491	0.000638246	32	16	0.877515	-1.33201	0.400092	0.129032	-1.51793	28	45	0.818695	0.149145	0.934022	0.855446	0.182174	58	59	0.827435	-0.765627	0.706178	0.354809
CNAG_01184	4	24	0.903599	0.120783	0.999845	0.893664	0.133669	93	48	12.1177	0.952167	0.32612	0.926694	0.731973	0.342503	8	11	3.41998	0.581083		0.865082	0.169908	15	6	3.2643	1.80999		0.57925	0.55448	45	43	3.3731	1.05523		0.754404	0.312838	42	43	3.41998	-1.0461		0.759697	-0.305879	75	87	3.132	3.43134		0.273264
CNAG_01185	12	65	0.473718	0.322031	0.999845	0.496635	0.679794	215	239	32.9646	0.518047	-0.0783033	0.969257	0.879857	-0.151151	27	18	2.30785	-2.85377		0.216254	-1.23655	18	10	1.86621	0.505133		0.786642	0.270673	124	105	2.30785	-3.98651		0.084102	-1.72737	140	110	2.07015	-2.0351		0.325572	-0.983072	279	253	2.09576	-2.58169		0.217999
CNAG_01186	4	22	0.569551	0.257479	0.999845	0.651216	0.452073	78	72	17.7503	0.607534	1.1833	0.291876	0.051449	1.94772	27	12	0.528529	0.0152753	0.985556	0.976943	0.0289016	20	14	0.512751	0.097085	0.967201	0.849825	0.189341	36	25	0.523331	-0.799885	0.397395	0.126401	-1.52845	36	37	0.513926	-0.44995	0.62201	0.381294	-0.875515	78	89	0.509175	-0.116728	0.945791	0.818675
CNAG_01187	18	37	0.590188	-0.590874	0.999845	0.316749	-1.00116	115	97	21.7941	0.630653	-0.164523	0.94296	0.794187	-0.260878	27	12	2.07452	0.670121		0.746676	0.323025	18	1	2.46035	-4.67342		0.0575	-1.89949	50	31	2.1311	-1.25638		0.555494	-0.589547	88	119	2.14084	-1.8606		0.384794	-0.869097	146	185	2.46035	-5.48726		0.0257293
CNAG_01188	2	6	0.980569	0.379758	0.999845	0.698546	0.387284	23	31	4.73822	1.13588	0.0915758	0.986808	0.935743	0.0806214	4	2	0.499879	-1.5366	0.0407735	0.00211249	-3.07394	2	1	0.45846	0.266338	0.890377	0.56128	0.580941	16	10	0.457514	0.625321	0.463601	0.171694	1.36678	9	13	0.454947	1.12646	0.0681221	0.0132852	2.47603	46	28	0.454456	1.02868	0.156792	0.0236019
CNAG_01189	56	145	0.519263	0.0535007	0.999845	0.917938	0.103032	535	625	86.963	0.540997	-0.698348	0.558304	0.196754	-1.29085	51	37	1.19204	-0.633827		0.594922	-0.531717	54	24	0.951366	0.227644	0.956018	0.810888	0.239281	248	206	1.07291	-1.02348		0.340122	-0.953924	344	272	0.934637	0.132117		0.887589	0.141356	613	590	0.917887	0.11585	0.972892	0.899562
CNAG_01190	5	15	0.694968	-0.599766	0.999845	0.388131	-0.863011	37	32	8.76295	0.810541	-0.392549	0.890397	0.62817	-0.484305	8	3	2.09915	0.545997		0.794784	0.260103	6	0	1.65559	2.92218	0.39112	0.0775578	1.76504	21	10	1.66658	2.73786		0.100425	1.6428	37	36	1.70618	1.53531		0.368199	0.899852	53	50	1.65171	2.22011	0.520871	0.178908
CNAG_01191	5	6	1.02788	-0.612156	0.999845	0.551474	-0.595554	19	27	6.38927	1.14123	-0.30906	0.941118	0.786535	-0.270813	6	2	1.10598	-1.3882		0.209415	-1.25518	4	1	0.793579	-0.122285	0.973057	0.877536	-0.154093	10	4	0.795809	-0.0735004		0.926413	-0.0923593	20	9	0.764689	0.0720071	0.96862	0.924978	0.0941651	15	18	0.753632	-0.0245119	0.99709	0.974053
CNAG_01192	624	239	1.40873	-1.12169	0.999845	0.425888	-0.796248	1408	2331	458.426	1.4104	-1.29935	0.7288	0.356914	-0.921261	145	223	4.17765	2.70832		0.5168	0.648287	190	6	4.15512	1.68336		0.685382	0.40513	829	279	4.0868	2.78153		0.496117	0.680613	39	111	4.10629	1.92016		0.640061	0.467613	461	679	4.09726	1.66781		0.683967
CNAG_01193	0	6	1.55045	-0.135995	0.999845	0.930105	-0.0877132	16	6	2.69146	1.61086	1.30223		0.418858	0.808404	3	4	1.13377	0.187502		0.868645	0.16538	3	1	0.993228	1.07442	0.714171	0.279365	1.08175	18	6	1.1083	-0.712719		0.520177	-0.643072	7	4	1.03867	-0.340523	0.879424	0.74303	-0.327844	7	15	1.0182	-0.367434	0.904558	0.7182
CNAG_01194	1	2	1.88516	-1.279	0.999845	0.497482	-0.678458	4	3	1.21883	2.21735	-0.997261		0.652888	-0.449754	0	1	2.42834	-0.860207		0.723161	-0.354237	4	0	2.03037	2.12969		0.294216	1.04892	5	3	2.22918	0.2956		0.894506	0.132605	3	1	2.39562	-1.08225		0.651441	-0.451762	4	1	1.99263	2.31204		0.245929
CNAG_01195	18	59	0.431986	0.206291	0.999845	0.632977	0.477541	212	247	37.6125	0.470772	0.0853379	0.959521	0.856154	0.181272	43	16	0.873279	-0.858427	0.539515	0.325611	-0.982992	28	5	0.707433	0.24566	0.947991	0.728399	0.347256	72	99	0.897557	-2.16669	0.117683	0.0157791	-2.41399	143	135	0.763174	-1.32247	0.240047	0.0831204	-1.73286	260	234	0.697826	-0.234223	0.915336	0.737137
CNAG_01196	5	16	0.831879	0.230273	0.999845	0.781925	0.276811	62	66	10.2177	0.949644	-0.582522	0.848307	0.539605	-0.613411	10	1	1.23134	-2.36081		0.0552034	-1.91727	7	3	0.726578	0.771627	0.725132	0.288235	1.062	18	13	0.800001	-0.796972	0.623834	0.319146	-0.996214	39	42	0.760615	-0.61108	0.656841	0.421742	-0.803403	53	74	0.738079	-0.439189	0.82216	0.551815
CNAG_01197	9	50	0.722137	-0.89443	0.999845	0.215498	-1.23859	67	80	25.1317	0.736561	0.836945	0.634738	0.255837	1.13629	25	32	0.891227	-0.947126	0.508241	0.287908	-1.06272	27	7	0.739547	-0.859897	0.677493	0.244937	-1.16274	40	42	0.698418	-0.172092	0.913919	0.805371	-0.246402	73	84	0.679726	-0.295005	0.828427	0.664285	-0.434005	117	132	0.64242	0.482846	0.778466	0.452289
CNAG_01198	16	31	0.809463	-1.5273	0.759273	0.059186	-1.88681	63	35	18.8442	0.959311	-2.29747	0.1505	0.016624	-2.39492	6	2	0.703943	0.572192	0.61041	0.416311	0.812839	2	6	0.68974	-0.273158	0.938207	0.692082	-0.396031	21	15	0.684322	0.00324889	0.998445	0.996212	0.0047476	44	44	0.686151	-0.560148	0.649713	0.414293	-0.816362	51	82	0.691422	-1.13196	0.398167	0.101601
CNAG_01199	19	50	0.505519	-0.23713	0.999845	0.639011	-0.469082	170	149	25.1691	0.585904	-1.1071	0.314202	0.0588164	-1.88956	17	7	1.18985	-0.989691		0.405535	-0.831777	18	5	0.944318	-0.0457884	0.990963	0.961327	-0.0484883	72	77	1.33355	-2.74145		0.0398062	-2.05575	88	150	0.934474	-0.265227		0.776544	-0.283825	225	240	0.931538	-0.610464	0.801471	0.512256
CNAG_01200	2	6	1.25314	0.740486	0.999845	0.554584	0.590906	28	42	3.83533	1.47435	-0.702675	0.894015	0.633647	-0.476599	4	0	2.01871	0.770998		0.702516	0.381926	1	0	1.86044	1.1587		0.533411	0.622807	30	18	2.24684	-1.60396		0.475305	-0.713874	7	10	1.86826	0.624333		0.738244	0.334179	37	29	1.83094	1.00457		0.583237
CNAG_01201	1	3	1.29411	-0.56482	0.999845	0.662508	-0.436454	7	7	2.9198	1.63891	-0.595185		0.716487	-0.363158	2	0	1.5501	-2.74159	0.250307	0.0769514	-1.76866	2	0	0.806137	1.01467	0.635842	0.208145	1.25868	13	1	0.81632	0.791098	0.634802	0.332494	0.969103	4	5	0.796859	0.980283	0.446929	0.218628	1.23018	10	11	0.790615	0.883079	0.621309	0.264015
CNAG_01202	6	7	0.992502	-0.734904	0.999845	0.459023	-0.740456	29	22	6.02189	1.10505	-0.502239	0.897037	0.649473	-0.454495	8	1	1.83684	0.428944		0.815355	0.233523	1	1	1.71381	-0.0781439		0.963632	-0.0455967	15	8	1.60612	1.03944		0.517517	0.647177	28	21	1.57532	1.02361		0.515834	0.649781	44	32	1.54742	1.24319		0.421747
CNAG_01203	2	9	0.803818	0.317455	0.999845	0.692892	0.394934	40	28	10.815	0.836383	1.87708	0.190101	0.0248138	2.24429	13	12	1.55869	-2.7433		0.0784077	-1.76	13	2	0.849542	0.273194	0.94877	0.747772	0.321578	16	12	0.983592	-1.33925		0.173327	-1.36159	26	33	0.907007	-1.07239	0.470315	0.237073	-1.18233	54	46	0.841088	-0.3362	0.888618	0.689362
CNAG_01204	38	186	0.374786	0.139018	0.999845	0.710692	0.370927	580	592	82.4281	0.396946	-0.243292	0.848307	0.539936	-0.61291	73	45	1.48977	-0.0961671		0.948531	-0.0645515	64	21	1.10871	2.20846	0.283914	0.04638	1.99192	265	179	1.19398	0.687748		0.564606	0.576014	350	382	1.12608	1.31586		0.242593	1.16853	765	795	1.11585	1.17964	0.64964	0.290435
CNAG_01207	2	5	1.08472	-0.0978785	0.999845	0.928101	-0.0902343	16	19	3.82839	1.23255	0.116945	0.982781	0.92441	0.0948802	2	3	1.48066	-3.53621		0.0169279	-2.38827	1	1	0.659115	0.00321465	0.999286	0.996109	0.00487723	12	14	0.682892	-0.403498	0.808746	0.55461	-0.590867	8	11	0.715098	-1.39533	0.175697	0.0510285	-1.95124	13	7	0.663883	-0.919984	0.507211	0.16582
CNAG_01208	13	36	0.710735	-0.233441	0.999845	0.742571	-0.32845	124	102	19.0519	0.797304	-1.15724	0.491587	0.146657	-1.45144	16	2	0.653791	-0.270738	0.820486	0.678797	-0.414106	13	4	0.538057	1.70751	0.0169426	0.00150624	3.17348	50	49	0.568129	0.24163	0.864791	0.670612	0.425308	77	50	0.581181	-0.63593	0.509439	0.273867	-1.0942	115	122	0.54992	0.0891961	0.960468	0.87115
CNAG_01209	6	31	0.563069	0.209716	0.999845	0.709557	0.372451	114	92	20.6005	0.610175	0.520998	0.753063	0.393188	0.853849	27	9	0.837443	-0.199571	0.883922	0.811641	-0.23831	14	5	0.68745	0.771819	0.695157	0.261553	1.12273	68	36	0.728192	-0.0567258	0.97368	0.937908	-0.0778995	52	64	0.694211	0.173428	0.911552	0.802726	0.249821	99	92	0.676845	0.324057	0.861109	0.632098
CNAG_01210	0	2	4.92712	-3.01795		0.540195	-0.612518	0	1	0.291586	4.9044	-0.19328		0.968564	-0.0394096	1	0	0.494654	0.246245	0.771225	0.618617	0.497812	0	0	0.458243	0.117448	0.953479	0.797719	0.2563	2	0	0.47078	-0.253771	0.826499	0.589857	-0.539043	5	1	0.4495	0.144876	0.882575	0.747221	0.322306	4	2	0.443273	0.141129	0.922578	0.750197
CNAG_01211	26	77	0.533881	-0.298101	0.999845	0.576594	-0.558366	256	192	32.4911	0.581192	-0.909397	0.438066	0.117651	-1.56471	20	17	1.79195	-1.71282		0.339151	-0.955844	19	3	1.38833	-0.955254	0.850434	0.491414	-0.688061	92	121	1.32313	-0.264273		0.841689	-0.199733	112	189	1.29743	-0.444022		0.732175	-0.342233	305	366	1.29411	-0.803233		0.534808
CNAG_01212	0	15	1.17355	0.898876	0.999845	0.443709	0.765945	59	48	6.96766	1.28563	-0.0161009	0.996539	0.990008	-0.0125237	6	2	3.73416	2.24046		0.548512	0.599992	1	8	3.78296	-0.636671		0.866348	-0.1683	28	14	3.67435	1.62481		0.658342	0.442204	32	20	3.66707	1.18428		0.746733	0.32295	45	51	3.54632	2.59563		0.464216
CNAG_01213	17	40	0.504417	-0.158652	0.999845	0.753122	-0.314526	157	127	25.0727	0.554462	-0.196838	0.923801	0.722585	-0.355007	24	13	0.808977	-0.342633	0.813596	0.671903	-0.423538	20	10	0.684186	0.274987	0.93667	0.687744	0.401919	41	52	0.721938	-0.423249	0.809412	0.557696	-0.586267	71	78	0.682542	-0.0850427	0.956374	0.900843	-0.124597	150	156	0.677424	-0.341597	0.854778	0.614079
CNAG_01214	0	1	2.85661	1.95472		0.493798	0.684281	9	12	0.672305	3.14142	0.420444		0.89353	0.133839	1	0	1.71878	3.36054		0.0505601	1.95519	4	1	1.75053	1.69499	0.755071	0.332908	0.968273	9	11	1.73508	1.97878		0.254097	1.14045	3	6	1.75686	1.20641		0.492282	0.686685	9	13	1.6734	2.36115	0.498265	0.158248
CNAG_01215	4	0	1.68357	0.00525691	0.999845	0.997509	0.00312247	17	24	5.14766	1.86063	-0.734965	0.915119	0.692837	-0.395008	4	0	2.17186	-0.470219		0.828594	-0.216505	2	2	1.80729	0.712355		0.693466	0.394156	6	6	2.22193	-2.98929		0.178509	-1.34536	15	11	1.76781	0.920717		0.60249	0.520823	19	9	1.7605	0.660834		0.707387
CNAG_01216	9	24	0.546527	0.517694	0.999845	0.343515	0.947244	119	133	19.3239	0.632797	-0.244361	0.91813	0.699378	-0.38616	13	7	1.47896	-0.461717		0.754895	-0.312191	8	4	1.37331	-0.703071	0.910224	0.608682	-0.511955	57	72	1.43265	-1.23191		0.389854	-0.859883	70	78	1.39092	-1.31751		0.343526	-0.94722	195	196	1.34603	-1.11814		0.406146
CNAG_01217	8	28	0.56514	-0.182823	0.999845	0.746317	-0.3235	87	75	16.4182	0.637463	-0.155961	0.946402	0.806721	-0.244659	17	6	1.43204	-1.14488		0.424013	-0.799479	8	4	1.27005	-1.47648	0.677493	0.245018	-1.16254	41	40	1.15093	-0.252921		0.826063	-0.219753	50	39	1.16463	-0.92902		0.425045	-0.797699	112	109	1.15548	-1.21713	0.652318	0.292181
CNAG_01220	6	17	0.749506	-0.916339	0.999845	0.221484	-1.22259	41	24	8.86902	0.835176	-0.314889	0.920729	0.706149	-0.377033	8	5	1.80359	-3.18662		0.0772578	-1.76682	6	6	1.18508	0.200092	0.970476	0.86592	0.168843	17	7	1.38658	-1.41861		0.30626	-1.0231	20	18	1.12942	0.964964		0.392889	0.854389	36	38	1.12612	0.666623	0.823607	0.553876
CNAG_01221	2	17	0.849088	0.462037	0.999845	0.586333	0.544157	67	51	7.59565	1.04344	-1.02605	0.703306	0.325446	-0.983327	5	1	1.67313	0.119843		0.942898	0.071628	9	4	1.48248	0.366723		0.804621	0.247371	28	27	1.53987	-0.132968		0.931188	-0.0863498	28	27	1.48248	-0.038511		0.979275	-0.0259773	50	70	1.44632	0.0855497		0.952833
CNAG_01222	13	62	0.477257	-0.142079	0.999845	0.765933	-0.297699	170	158	30.8216	0.515404	0.0678256	0.971516	0.895303	0.131597	31	19	1.67538	-1.41977		0.396755	-0.847431	28	6	1.09659	0.653753	0.885484	0.551064	0.596166	112	82	1.15168	0.0693164		0.952007	0.0601873	114	116	1.1361	-0.259798		0.819122	-0.228674	227	259	1.07541	0.195124	0.95588	0.856022
CNAG_01223	2	8	0.945431	0.26129	0.999845	0.782263	0.276371	32	28	6.55281	0.99669	1.32313	0.54241	0.184335	1.32753	9	7	1.53478	2.47053		0.107464	1.6097	0	5	1.76425	-0.63903	0.942636	0.717195	-0.362211	15	17	1.78688	-0.672999		0.706447	-0.376633	15	18	1.59128	0.132182		0.933799	0.0830661	20	34	1.50299	1.03526		0.490947
CNAG_01224	193	402	0.424627	-0.422642	0.999845	0.319577	-0.995327	1373	1281	321.549	0.433551	-0.795242	0.334408	0.0666168	-1.83425	208	80	2.85196	-1.86926		0.512191	-0.655431	138	50	2.54474	0.658072		0.795944	0.2586	586	458	2.69828	-0.785567		0.770947	-0.291136	804	889	2.59125	-0.387889		0.881008	-0.149692	1642	1748	2.52696	0.201181		0.936544
CNAG_01228	6	12	0.898475	-0.9722	0.999845	0.279227	-1.08206	31	22	5.17725	1.34483	-2.77276	0.25026	0.0392269	-2.0618	1	1	2.88214	2.15673		0.454273	0.74831	5	3	2.76958	1.7102		0.536907	0.617496	14	4	2.93904	-0.551646		0.851115	-0.187696	13	22	2.75632	1.40527		0.610167	0.509836	22	60	2.62146	2.73029		0.297636
CNAG_01229	4	11	0.895704	0.166903	0.999845	0.85218	0.186337	48	42	5.39496	1.2457	-1.96065	0.435656	0.115501	-1.57394	3	0	2.01134	-0.950588		0.636488	-0.472615	3	4	1.80314	-1.15577		0.521538	-0.640976	24	22	2.03378	-2.17736		0.284349	-1.0706	16	28	1.72337	-1.08545		0.528799	-0.62984	63	66	1.617	-0.494373		0.759807
CNAG_01230	78	277	0.301377	0.322763	0.999845	0.284187	1.07096	1183	1085	168.518	0.318984	-0.336437	0.67234	0.291555	-1.05472	148	54	0.902284	-1.59188	0.251799	0.0776859	-1.76427	113	50	0.772805	0.464064	0.883902	0.548178	0.600493	469	412	0.84	-1.85569	0.164243	0.0271637	-2.20916	623	540	0.897703	-3.16949	0.0036071	0.000414515	-3.53067	1318	1330	0.786637	-1.23579	0.424899	0.116187
CNAG_01231	4	27	0.721225	0.56238	0.999845	0.435535	0.779756	112	98	16.1389	0.758719	0.86789	0.63048	0.25267	1.14389	14	17	0.469434	0.787353	0.276576	0.0934955	1.67724	21	17	0.45403	0.123292	0.950745	0.785969	0.271549	49	25	0.479381	-0.629764	0.486627	0.188947	-1.3137	60	42	0.451222	-0.151661	0.877746	0.736786	-0.336112	97	108	0.433085	0.713722	0.393922	0.0993535
CNAG_01232	5	55	0.733345	0.302955	0.999845	0.679523	0.413114	168	141	21.4359	0.776311	-0.077274	0.980697	0.920709	-0.0995401	19	12	1.14995	-0.602274		0.600459	-0.52374	22	9	0.997168	-0.368491	0.942238	0.711727	-0.369537	73	61	1.16855	-1.8482		0.113736	-1.58162	110	100	0.998485	-0.794385		0.42627	-0.795591	183	177	1.05369	-1.86512	0.346011	0.0767127
CNAG_01233	17	68	0.395343	1.05871	0.13701	0.00740764	2.67794	447	436	51.5412	0.424531	0.594201	0.512892	0.161614	1.39966	59	28	0.594361	0.49921	0.601156	0.400958	0.839911	45	34	0.538068	1.45672	0.0651306	0.00678293	2.70732	170	194	0.588119	-0.496354	0.6863	0.398686	-0.84397	122	102	0.561119	-0.20963	0.860989	0.708708	-0.373592	261	233	0.543064	0.27503	0.854311	0.612546
CNAG_01234	3	52	0.777848	0.566612	0.999845	0.466347	0.728435	168	156	17.2961	0.840102	-0.475175	0.86522	0.571655	-0.565616	16	6	1.20312	-2.88744	0.119224	0.0163966	-2.39997	27	13	0.644834	0.674582	0.731307	0.295499	1.04613	82	73	0.783308	-1.82163	0.136545	0.0200422	-2.32556	102	88	0.739469	-1.8334	0.0675734	0.0131624	-2.47934	192	217	0.66756	-0.937769	0.499432	0.160089
CNAG_01235	29	83	0.385229	0.324883	0.999845	0.399033	0.84335	395	354	58.4404	0.417578	-0.0339842	0.986453	0.935137	-0.0813841	58	23	1.79813	0.563393		0.754036	0.313322	37	10	1.55244	1.62127		0.296328	1.04434	170	116	1.79813	-0.566368		0.75278	-0.314976	229	243	1.56613	0.95905		0.540293	0.61237	455	444	1.53857	1.13226		0.461783
CNAG_01236	18	39	0.585533	-0.589456	0.999845	0.314079	-1.0067	113	104	22.4144	0.648055	-0.76482	0.613806	0.237929	-1.18018	12	12	1.55553	0.519276		0.738511	0.333826	7	0	1.45648	0.0838312		0.954101	0.0575575	40	42	1.45854	0.150889		0.917604	0.103452	69	76	1.54172	-1.01443		0.510549	-0.657983	130	167	1.44388	-0.596724		0.679403
CNAG_01237	2	7	0.949714	-0.124882	0.999845	0.895384	-0.131494	20	22	4.37069	1.25333	-1.05005	0.762135	0.402137	-0.837811	2	1	1.69006	0.464217		0.783566	0.274675	3	0	1.3983	1.68709	0.657158	0.227615	1.20653	6	6	1.5058	0.441106		0.76957	0.292937	14	17	1.42839	0.783716		0.583232	0.548671	20	17	1.37048	1.54811		0.25864
CNAG_01238	14	42	0.531028	-0.313203	0.999845	0.555321	-0.589805	128	110	18.0641	0.61068	-0.840645	0.520942	0.168645	-1.37657	17	6	0.960821	-1.18378	0.434616	0.217929	-1.23205	8	10	0.74185	-0.633568	0.791763	0.393084	-0.854038	53	50	0.674252	0.784663	0.551165	0.244524	1.16375	56	73	0.666155	0.556793	0.63869	0.40325	0.835831	185	131	0.64498	1.2271	0.290969	0.0571014
CNAG_01239	5	39	0.685323	0.425467	0.999845	0.534713	0.620827	139	124	16.6266	0.743098	-0.0762755	0.979147	0.918244	-0.102645	14	10	1.67584	0.779919		0.641652	0.46539	18	6	1.56278	0.892716		0.567839	0.571237	53	37	1.61496	0.230753		0.886381	0.142885	80	56	1.5899	0.0514237		0.974198	0.0323441	97	144	1.64188	-0.956452		0.560206
CNAG_01240	4	5	1.05208	-0.412206	0.999845	0.695206	-0.3918	13	29	5.87889	1.11468	0.69241	0.845395	0.534484	0.621176	10	3	6.75348	1.92026		0.776153	0.284336	6	3	6.76668	-0.636661		0.92504	-0.0940876	10	12	6.76668	-0.551636		0.935027	-0.0815223	19	17	6.70522	1.1494		0.863895	0.171418	34	25	6.76668	-1.45049		0.830268
CNAG_01241	6	14	0.788075	0.122865	0.999845	0.876108	0.155905	47	73	8.83308	0.910378	-0.600822	0.83117	0.509273	-0.659971	7	3	1.96291	1.84489		0.347281	0.939877	12	0	1.9351	1.01877		0.59856	0.526473	28	25	2.30311	-1.61199		0.483977	-0.69992	35	23	1.95339	0.335524		0.863622	0.171765	60	55	1.99181	-0.535399		0.788083
CNAG_01242	4	13	0.68921	0.264677	0.999845	0.700956	0.38403	50	55	9.54475	0.762929	0.57075	0.794833	0.454398	0.748103	13	5	0.672763	-2.86264	0.00248016	2.09002e-05	-4.25505	0	6	0.478544	0.542506	0.689582	0.256937	1.13366	21	18	0.578501	-2.96224	2.34431e-05	3.04636e-07	-5.12056	26	25	0.510997	-1.97858	0.00104234	0.000107946	-3.872	47	51	0.480806	-0.553416	0.607213	0.249725
CNAG_01243	8	19	0.668763	-0.227694	0.999845	0.733503	-0.34047	69	58	16.8643	0.697204	1.04602	0.465715	0.133534	1.50031	36	9	1.83068	-2.44973		0.180847	-1.33815	11	6	1.17899	1.89479	0.469103	0.108026	1.60713	28	33	1.23702	0.862208		0.485799	0.697006	38	53	1.19327	1.1309		0.343268	0.947729	79	82	1.18473	0.931324	0.768313	0.431805
CNAG_01244	1	4	1.18998	-0.24623	0.999845	0.836073	-0.20692	6	15	4.83396	1.20317	2.37903	0.280282	0.0480078	1.9773	8	8	1.21638	1.57275		0.196017	1.29298	11	1	1.09961	2.5509	0.159761	0.0203508	2.31982	5	6	1.20826	0.527663		0.66232	0.436712	4	2	1.74409	-2.64915		0.128782	-1.51892	13	5	1.12612	0.91373	0.758425	0.417137
CNAG_01245	5	17	0.690751	-0.407405	0.999845	0.555325	-0.5898	43	42	9.14992	0.803004	-0.410635	0.882341	0.609089	-0.511374	6	5	1.2557	-0.761407		0.544275	-0.606361	9	0	0.965463	0.950221	0.75471	0.325011	0.984213	16	14	1.64355	-3.38621		0.0393697	-2.0603	22	42	1.06823	-1.09706		0.304427	-1.02699	42	52	1.00456	-0.689918	0.797049	0.492219
CNAG_01246	2	6	1.06104	-1.06362	0.999845	0.316135	-1.00243	12	8	3.43435	1.32059	-0.913028	0.819609	0.489327	-0.69138	2	1	1.0189	1.24725		0.220908	1.22412	3	3	1.03928	-0.179307	0.969768	0.863021	-0.17253	4	11	1.0085	0.239789		0.812061	0.237768	14	8	0.925692	1.3589	0.342866	0.14211	1.46798	15	19	0.914364	1.3985	0.440096	0.126146
CNAG_01247	2	6	1.02446	-0.476224	0.999845	0.642037	-0.464852	17	13	4.44444	1.08074	1.09171	0.692965	0.312426	1.01014	8	4	1.76709	-3.6681		0.0379132	-2.07579	4	1	1.16002	-0.669019	0.891758	0.564121	-0.576732	10	7	1.18408	-0.829363		0.48366	-0.700428	20	9	1.16262	-1.10542		0.341709	-0.950795	15	19	1.07799	-0.139712		0.89688
CNAG_01248	9	16	0.701044	-0.527068	0.999845	0.452151	-0.751833	57	45	11.0088	0.802323	-0.625709	0.783101	0.435467	-0.779871	9	4	0.952718	-1.17331	0.434616	0.218122	-1.23154	6	5	0.799285	-0.00269057	0.999286	0.997314	-0.00336623	34	28	0.834771	-0.838742	0.621602	0.315014	-1.00476	39	37	0.845446	-1.53694	0.21162	0.0690789	-1.8179	73	58	0.780925	0.0640426	0.988234	0.93464
CNAG_01249	3	8	0.848478	0.346685	0.999845	0.682836	0.408596	34	40	5.81511	0.957427	0.323818	0.927043	0.7352	0.338217	7	3	1.47868	-0.440789		0.765629	-0.298097	2	3	1.1348	1.24398	0.7101	0.272986	1.09621	17	12	1.25979	-0.31629		0.801764	-0.251065	19	19	1.20631	-0.291895		0.808801	-0.241973	28	45	1.1693	-0.210384	0.956172	0.857213
CNAG_01250	9	37	0.557107	-0.311787	0.999845	0.575716	-0.559654	97	87	16.5828	0.643228	-0.674858	0.673688	0.294098	-1.04917	15	5	1.19314	-0.63357		0.595413	-0.531008	15	5	0.924989	0.783071	0.792353	0.397233	0.846574	61	57	1.04452	-0.780284		0.455048	-0.747025	72	75	0.938109	0.091053	0.967813	0.922679	0.0970602	102	102	0.905297	0.540908	0.821743	0.550178
CNAG_01251	15	87	0.434418	0.247142	0.999845	0.569421	0.568905	264	299	45.9678	0.460333	0.406588	0.743218	0.377103	0.883246	59	27	0.825254	-0.828353	0.533192	0.315496	-1.00376	32	15	0.730691	0.0649975	0.985107	0.929119	0.0889535	145	80	0.82764	-1.99133	0.119749	0.0161268	-2.40603	179	200	0.7682	-1.52075	0.165943	0.0477461	-1.97962	324	352	0.765765	-1.87109	0.110272	0.0145483
CNAG_01252	1	11	0.908259	1.09221	0.999845	0.229156	1.20254	52	63	7.04158	0.983839	0.938791	0.71605	0.339976	0.954212	12	3	1.60348	4.58977	0.0588303	0.00420479	2.86238	8	4	1.68963	1.69169	0.751513	0.31672	1.00122	44	23	1.64735	2.37366	0.430523	0.149613	1.4409	20	27	1.60081	3.05754	0.186546	0.0561332	1.91	68	42	1.58779	3.25978	0.23006	0.0400696
CNAG_01253	14	20	0.764991	-0.561706	0.999845	0.462787	-0.734265	95	53	21.4894	0.800069	0.18103	0.950364	0.820993	0.226268	17	14	1.28433	-2.3521	0.232979	0.0670434	-1.83138	10	14	0.80721	1.07025	0.600939	0.184884	1.32587	35	35	0.846901	-0.177664	0.92594	0.833838	-0.209781	45	71	1.05578	-2.91686	0.0351827	0.00573141	-2.76276	134	133	0.821995	-0.3811	0.865392	0.642914
CNAG_01254	2	7	0.822914	1.02966	0.999845	0.21085	1.25123	33	60	11.1914	0.901427	1.19205	0.544567	0.186033	1.32241	9	5	0.704245	0.520704	0.644836	0.459677	0.739378	1	1	0.65304	0.771638	0.669264	0.237361	1.18161	38	21	0.638238	1.8452	0.0527178	0.0038391	2.89109	23	5	0.629698	2.45934	0.000917947	9.39951e-05	3.90559	12	18	0.630986	1.81957	0.0359495	0.00393051
CNAG_01255	6	12	0.664933	0.1105	0.999845	0.868014	0.166182	53	55	13.0627	0.741261	0.377244	0.883664	0.610807	0.508922	13	5	1.02216	0.754911		0.460184	0.738544	7	0	0.866107	1.96347	0.17726	0.0233896	2.26701	27	21	0.990799	-0.0948103		0.923766	-0.0956908	22	44	0.918975	0.303221	0.878638	0.741434	0.329955	76	61	0.884577	0.59435	0.798461	0.501646
CNAG_01256	3	10	1.00327	-1.11698	0.999845	0.265562	-1.11334	20	11	4.38208	1.10818	-0.228895	0.954869	0.836361	-0.20655	3	4	1.11673	-0.2444		0.826765	-0.218853	4	3	0.92785	0.515132	0.900566	0.578766	0.555189	10	10	1.04107	-0.82327		0.429065	-0.790793	12	8	1.04005	-1.30557		0.209374	-1.25529	20	12	0.945005	-0.607376	0.806557	0.520404
CNAG_01257	3	34	0.72817	0.400151	0.999845	0.582642	0.54953	115	94	13.9101	0.799357	-0.168708	0.953564	0.832845	-0.211054	10	8	1.4883	-2.75367	0.228087	0.064283	-1.85021	6	5	0.670715	1.16543	0.405896	0.0822813	1.7376	39	36	0.703751	0.430933	0.796823	0.540315	0.612337	64	68	0.705847	-0.102784	0.945857	0.884223	-0.145618	129	118	0.667629	0.458544	0.797049	0.492194
CNAG_01258	9	20	0.688882	0.533993	0.999845	0.438246	0.775159	124	112	20.9487	0.726563	0.743111	0.68709	0.306414	1.02278	32	8	1.32459	1.04917		0.428318	0.792072	11	7	1.20483	1.2014	0.752979	0.318693	0.997147	71	67	1.30888	0.0461611		0.971866	0.0352676	82	89	1.24834	0.158405		0.899026	0.126892	150	146	1.23184	-0.0335877	0.99709	0.978247
CNAG_01261	25	192	0.633183	0.340219	0.999845	0.59105	0.537315	672	506	68.0426	0.656008	-0.75308	0.628435	0.250979	-1.14797	68	15	1.09769	0.584587		0.594338	0.532561	49	15	0.951046	1.29394	0.589762	0.173658	1.36054	316	240	1.15394	-0.937186		0.416699	-0.812162	307	389	1.21661	-1.77982		0.143486	-1.46293	794	757	0.963714	0.192493	0.950943	0.841683
CNAG_01262	3	31	0.729523	-0.113045	0.999845	0.876855	-0.154958	57	79	14.8822	0.773015	0.505568	0.832284	0.513098	0.654021	23	7	0.890129	0.331711	0.833708	0.709405	0.372655	23	13	0.828876	-0.0686326	0.986151	0.934009	-0.082802	51	50	0.901573	-0.916273	0.616511	0.309484	-1.0163	35	23	0.855346	-0.877916	0.543518	0.304709	-1.02639	48	42	0.77332	0.580641	0.778466	0.452748
CNAG_01263	13	40	0.524781	0.287149	0.999845	0.584256	0.547179	172	167	28.6275	0.572122	0.0518088	0.983652	0.927846	0.0905556	34	8	1.63402	-4.18249		0.0104783	-2.55963	10	4	0.883427	-0.517603	0.889149	0.557941	-0.585903	81	71	1.13745	-2.33271		0.0402833	-2.05083	112	104	0.855779	-0.507234		0.553371	-0.592716	239	260	0.827268	-0.32164	0.893308	0.697426
CNAG_01264	35	122	0.407741	-0.129158	0.999845	0.751423	-0.316764	411	326	61.1214	0.439167	-0.491416	0.642871	0.263152	-1.11897	63	19	1.23637	3.33578		0.00697459	2.69805	41	16	1.29109	1.19214	0.766782	0.355819	0.923361	193	127	1.30244	1.12879		0.38612	0.866675	201	244	1.20898	2.53344	0.137178	0.0361259	2.09551	460	495	1.20646	2.233	0.312561	0.0641892
CNAG_01265	5	15	0.905698	0.108901	0.999845	0.904294	0.120239	62	52	9.73662	0.950863	0.65467	0.820317	0.491137	0.688501	7	12	6.73676	2.34444		0.727835	0.348007	13	1	6.68936	1.81232		0.786448	0.270926	38	20	6.76668	-0.551636		0.935027	-0.0815223	30	17	6.75731	0.321058		0.962105	0.0475126	40	47	6.76668	-1.45049		0.830268
CNAG_01266	15	62	0.456991	0.150675	0.999845	0.741618	0.329712	207	216	35.9794	0.497205	0.0198387	0.993401	0.968173	0.0399004	42	13	0.903499	0.354032		0.695172	0.391846	23	12	0.880831	-0.638169	0.835402	0.468754	-0.724508	91	85	0.972306	-1.29508		0.182872	-1.33196	115	149	0.799245	0.0348541	0.986971	0.965216	0.0436088	281	275	0.81612	-0.660319	0.758954	0.41846
CNAG_01267	4	13	0.869961	-0.253271	0.999845	0.770953	-0.291129	43	31	6.48492	1.05611	-1.06995	0.691257	0.311011	-1.0131	5	1	2.62041	-0.484606		0.85328	-0.184935	3	1	2.3124	0.919577		0.690872	0.397672	15	25	2.41177	-0.19619		0.935166	-0.0813468	27	28	2.65927	-3.48171		0.190443	-1.30927	59	55	2.3673	-0.670369		0.77704
CNAG_01268	0	0	2.20386	2.12949	0.999845	0.333916	0.966256	7	3	2.12014	2.21616	4.83617		0.0290927	2.18223	2	5	0.913969	0.400786		0.661015	0.438512	3	0	0.845842	0.0847491	0.982864	0.92019	0.100195	4	3	0.889973	-0.463926		0.602171	-0.521281	1	1	0.840156	-0.220028	0.90655	0.793407	-0.261889	6	2	0.896972	-1.44236	0.408443	0.107829
CNAG_01270	24	75	0.556356	0.397607	0.999845	0.474817	0.714663	321	365	43.9643	0.594386	-0.52677	0.742459	0.375487	-0.886242	47	8	3.68702	1.93457		0.599794	0.524697	28	25	3.49627	2.81164		0.421291	0.804184	166	122	3.7128	-0.551644		0.881886	-0.148579	222	210	3.7128	-1.0461		0.778131	-0.281755	383	457	3.48751	2.19014		0.530007
CNAG_01271	6	20	0.718522	0.307441	0.999845	0.668738	0.42788	89	77	14.2067	0.790859	0.029476	0.99377	0.970269	0.0372708	11	7	2.02014	-1.47737		0.464585	-0.731317	14	2	1.6256	-0.33488		0.836788	-0.206004	39	29	1.77754	-1.40843		0.42816	-0.792343	56	59	1.60239	-0.454503		0.776685	-0.283641	93	124	1.63313	-1.22599		0.452833
CNAG_01272	4	16	0.985498	-0.227585	0.999845	0.817366	-0.230934	43	42	5.78216	1.19469	-1.55515	0.553886	0.193015	-1.30171	1	3	1.10412	0.79101	0.654741	0.473736	0.716414	6	1	0.932768	1.85365	0.286506	0.0468944	1.98725	15	10	1.00746	0.568029	0.818785	0.572874	0.563824	19	31	0.938302	1.29288	0.379111	0.168235	1.3779	66	42	0.919655	1.48367	0.407519	0.106683
CNAG_01273	18	50	0.610004	-0.113507	0.999845	0.852385	-0.186076	166	174	25.0457	0.680451	-1.09983	0.422249	0.106023	-1.61633	23	3	1.57651	-0.0100345		0.994922	-0.00636499	20	7	1.43001	-0.0200119		0.988835	-0.0139942	63	65	1.57329	-1.12222		0.475665	-0.713293	84	124	1.37211	0.517862		0.705862	0.377419	211	208	1.42795	-0.80462		0.57311
CNAG_01274	38	152	0.33636	-0.0951484	0.999845	0.777272	-0.282876	458	427	66.805	0.373691	-0.711585	0.309521	0.0568835	-1.9042	52	26	1.17877	-2.57844	0.153963	0.0287131	-2.1874	36	32	0.627157	0.211814	0.94877	0.735561	0.337737	210	199	0.668211	-0.541026	0.699507	0.418134	-0.809663	295	273	0.711737	-1.61942	0.100049	0.0228875	-2.27531	604	597	0.610034	-0.0574672	0.983409	0.924948
CNAG_01275	6	20	0.649227	0.505435	0.999845	0.436263	0.778519	100	90	11.4131	0.737477	-0.115815	0.968419	0.875212	-0.157042	9	7	3.04415	-0.86573		0.77611	-0.284392	10	3	2.75044	1.82009		0.508134	0.661746	35	38	2.86813	0.460201		0.872524	0.160453	39	51	3.02057	-1.10568		0.714327	-0.366051	126	113	2.8478	-0.273836		0.923396
CNAG_01276	22	95	0.787266	2.12719	0.128566	0.00689245	2.702	1438	1052	114.659	0.800185	0.515355	0.837184	0.519546	0.644045	94	26	1.82384	-3.44453		0.0589431	-1.88862	54	18	1.17847	0.63978	0.903771	0.587205	0.542891	920	869	1.39991	-1.60119		0.252716	-1.14378	293	159	1.19203	-0.0540734		0.963819	-0.0453623	449	237	1.20348	-0.669891	0.836432	0.577782
CNAG_01277	14	46	0.452243	0.108247	0.999845	0.81083	0.239356	171	163	25.7041	0.526976	-0.588688	0.644172	0.263949	-1.11711	19	9	3.69079	0.485989		0.89524	0.131676	14	9	3.57379	0.36202		0.919313	0.101299	97	69	3.67211	-0.37095		0.919536	-0.101018	106	130	3.5428	0.30845		0.930621	0.0870637	228	224	3.53004	0.0711418		0.983921
CNAG_01278	7	49	0.590345	1.14759	0.688424	0.0519047	1.94392	218	341	33.8738	0.637981	0.0941703	0.969925	0.882653	0.147607	28	10	0.756792	-1.19522	0.310997	0.114262	-1.57932	28	9	0.670955	0.0911379	0.977824	0.891953	0.135833	176	111	0.690212	-0.807681	0.549664	0.241924	-1.17019	104	83	0.705102	-1.79465	0.0588025	0.0109203	-2.54524	177	177	0.667164	-0.40076	0.820855	0.548045
CNAG_01279	2	18	0.830466	-0.416768	0.999845	0.615774	-0.501848	31	36	8.97241	0.878162	0.738157	0.761156	0.400589	0.84057	13	7	0.692285	1.62072	0.129141	0.019226	2.34112	6	1	0.712309	-0.299609	0.932248	0.674035	-0.420617	17	10	0.692505	0.472709	0.761957	0.494855	0.682607	20	31	0.691952	-0.0059267	0.996878	0.993166	-0.00856519	50	66	0.679891	0.226913	0.915965	0.738569
CNAG_01281	1	4	1.2446	0.253814	0.999845	0.838406	0.203932	20	10	3.40118	1.32492	1.27103	0.715102	0.337394	0.959326	5	3	2.71578	-2.45489		0.36603	-0.903935	5	6	2.70106	-2.25938		0.402885	-0.83648	12	5	2.43912	-0.456305		0.8516	-0.187078	10	16	2.5169	-1.63041		0.517124	-0.647786	12	8	2.41928	-1.13364		0.639366
CNAG_01282	7	10	0.810059	0.798123	0.999845	0.324494	0.985265	74	107	13.7693	0.854415	0.927449	0.659478	0.27771	1.08548	23	6	2.07551	-2.44467		0.23885	-1.17787	6	3	1.63065	0.0485753		0.976235	0.029789	72	77	1.78063	-0.998428		0.574992	-0.560715	44	38	1.67524	-0.782624		0.640378	-0.46717	65	78	1.55821	0.346652		0.823949
CNAG_01283	7	8	0.966345	-0.963781	0.999845	0.318596	-0.997347	33	18	9.299	0.983443	1.21841	0.584225	0.215375	1.23892	14	14	1.938	0.75688		0.696131	0.390548	8	0	1.74019	1.77832		0.306823	1.02191	12	28	1.85316	0.249623		0.892848	0.134702	14	17	1.85983	-0.306176		0.869238	-0.164626	44	40	1.79137	0.0274036		0.987795
CNAG_01284	5	37	0.628316	-0.111614	0.999845	0.859006	-0.17764	91	85	15.3961	0.688635	-0.0578965	0.985972	0.932997	-0.0840743	20	6	1.059	0.52221		0.621929	0.493119	21	5	0.978277	0.204184	0.961483	0.834669	0.208718	42	32	0.995901	0.0488793		0.960855	0.0490805	68	58	0.956162	0.15831	0.93956	0.868497	0.165568	93	119	0.920232	0.613046	0.799581	0.505292
CNAG_01285	1	19	1.10854	-0.580632	0.999845	0.60043	-0.523782	28	26	6.03566	1.21354	-0.449299	0.920729	0.711205	-0.370238	8	1	1.6395	3.65365		0.025846	2.22852	1	0	1.61443	3.02362	0.338119	0.0610858	1.87287	17	9	1.6292	2.73713		0.0929496	1.68004	34	24	1.61049	2.73202	0.252532	0.0898114	1.69639	46	34	1.58894	3.20507	0.244945	0.0436839
CNAG_01286	1	4	1.03761	0.813308	0.999845	0.433143	0.783824	18	26	8.11831	1.06342	2.7301	0.109061	0.0102499	2.56728	9	11	3.66094	-1.87061		0.609376	-0.510965	1	5	3.42712	0.655714		0.848266	0.191331	7	9	3.63776	-1.64144		0.651828	-0.451224	8	7	3.51594	-1.03937		0.767524	-0.295616	18	12	3.66094	-3.9022		0.286468
CNAG_01287	47	191	0.338875	0.129329	0.999845	0.702727	0.381642	658	631	101.452	0.368016	-0.638579	0.374607	0.082706	-1.7352	80	27	1.25587	0.323291		0.796852	0.257423	56	17	1.11656	0.708106	0.871045	0.525959	0.634187	327	281	1.71851	-2.906		0.0908376	-1.691	351	405	1.12066	0.225391		0.840601	0.201124	840	855	1.13603	-0.444633		0.695507
CNAG_01288	10	18	0.889295	-0.439317	0.999845	0.621302	-0.494006	71	54	13.9455	0.997186	-1.16412	0.618726	0.243047	-1.16741	9	2	1.26115	1.22201		0.332563	0.968964	8	4	1.20731	0.537915	0.927837	0.655925	0.445547	32	27	1.16584	1.18448		0.309632	1.01599	47	35	1.12616	1.52457	0.388998	0.175805	1.35379	64	78	1.11672	1.40839	0.558968	0.207245
CNAG_01289	1	1	1.44302	1.08556	0.999845	0.45188	0.752284	7	17	3.78976	1.47564	3.03243	0.252739	0.03988	2.05499	7	5	1.91252	-0.402361		0.833369	-0.210382	1	2	1.41609	2.10582		0.136999	1.48706	2	1	1.53942	0.443607		0.773221	0.288164	4	0	1.41704	1.67907		0.23605	1.18492	7	6	1.41752	1.26124		0.3736
CNAG_01290	2	14	0.862884	-1.00737	0.999845	0.243032	-1.16744	21	16	8.74288	0.905474	0.775313	0.752204	0.391859	0.856251	11	6	0.842569	-1.97911	0.128153	0.0188292	-2.3489	6	6	0.590277	-0.498513	0.792353	0.398367	-0.844541	12	7	0.569854	0.223741	0.87091	0.694594	0.392628	29	23	0.547944	0.910266	0.266094	0.0966656	1.66124	54	24	0.552914	0.143359	0.934449	0.79542
CNAG_01291	10	20	0.696497	-0.835463	0.999845	0.230325	-1.19952	52	45	10.0957	0.953373	-2.27251	0.152644	0.017142	-2.38365	4	1	0.66678	-0.60272	0.57085	0.366035	-0.903926	4	1	0.618091	-1.1619	0.334383	0.0601327	-1.87982	22	16	0.558505	0.382236	0.760585	0.493729	0.68439	28	31	0.547129	0.417456	0.675723	0.445467	0.762993	57	65	0.54821	-0.0479594	0.986351	0.930287
CNAG_01292	6	28	0.661618	-1.34871	0.583989	0.0414994	-2.03851	38	27	11.035	0.734193	-0.418882	0.863873	0.568316	-0.570534	9	7	0.629382	0.0263317	0.979158	0.966628	0.0418374	6	5	0.718427	-3.07811	0.000270805	1.83145e-05	-4.28451	30	20	0.645848	-1.66358	0.0905096	0.0100007	-2.57581	43	25	0.6443	-2.11967	0.00797982	0.00100229	-3.28988	40	43	0.665703	-3.04827	6.16401e-05	4.67149e-06
CNAG_01293	4	31	0.642482	0.237538	0.999845	0.711592	0.369719	95	92	15.8441	0.70011	0.249942	0.923689	0.721089	0.357004	21	6	0.806262	-0.0511779		0.949388	-0.0634755	15	6	0.665943	0.934978	0.569538	0.160322	1.40399	50	34	0.772265	-0.849381	0.579409	0.271395	-1.09986	100	62	0.747324	-1.05187	0.366387	0.159277	-1.40751	105	112	0.693109	-0.586256	0.74154	0.397644
CNAG_01294	3	4	0.8993	0.474685	0.999845	0.597612	0.527838	30	26	10.322	0.92869	2.2038	0.154939	0.0176433	2.37302	19	7	1.32129	1.2823		0.331802	0.970491	10	1	1.25578	0.801806	0.870033	0.523153	0.638493	16	18	1.41345	-0.528125		0.708671	-0.373642	18	15	1.24004	0.635581		0.608267	0.512549	32	37	1.19672	1.19565	0.67737	0.317747
CNAG_01295	7	9	0.803915	0.266215	0.999845	0.740533	0.331148	56	64	11.6988	0.871228	0.363714	0.908226	0.676333	0.417472	8	8	4.87597	1.92566		0.692896	0.394928	15	4	4.78723	1.81167		0.705105	0.378439	21	23	4.89471	-0.551642		0.910267	-0.112702	30	30	4.8814	0.325282		0.946871	0.0666371	48	73	4.70558	2.98293		0.526136
CNAG_01296	8	11	0.749719	-0.456228	0.999845	0.542835	-0.608532	34	51	13.1898	0.806028	0.351347	0.903409	0.66291	0.435899	13	7	0.931246	0.273802	0.873647	0.768745	0.294017	9	2	0.781712	0.868774	0.703901	0.266407	1.11137	23	17	0.78447	0.894659	0.561619	0.254094	1.14046	25	36	0.758503	1.06765	0.366387	0.159257	1.40758	42	48	0.742577	1.28229	0.362043	0.0842018
CNAG_01297	4	9	0.777561	-0.314394	0.999845	0.685968	-0.404333	34	23	8.55255	0.82732	1.01614	0.590514	0.21936	1.22823	12	7	0.707285	-1.18978	0.275287	0.0925357	-1.68217	9	4	0.592754	-0.454337	0.821006	0.443388	-0.766485	19	17	0.575324	0.356368	0.793717	0.535639	0.619422	13	15	0.566426	0.403054	0.700568	0.476729	0.711574	33	33	0.557621	0.858852	0.435902	0.12351
CNAG_01298	20	104	0.476811	0.000982606	0.999845	0.998356	0.00206079	333	252	40.6308	0.515671	-0.54625	0.671107	0.289463	-1.0593	41	15	0.807551	1.03881	0.410461	0.198313	1.28637	36	17	0.795792	0.120975	0.97317	0.879172	0.152018	141	111	0.841155	-0.762257	0.661763	0.364829	-0.906203	168	178	0.824169	-0.958703	0.478978	0.244734	-1.16324	315	417	0.813182	-1.13466	0.503205	0.162916
CNAG_01299	0	0	4.85703	0.393395		0.935446	0.0809949	2	1	0.324584	4.94556	2.19746		0.656803	0.444331	0	1	0.635451	-0.0225646	0.982351	0.971673	-0.0355097	0	1	0.599781	-0.327335	0.903292	0.585233	-0.545757	4	2	0.63151	-1.07674	0.334039	0.0881909	-1.70502	1	0	0.601181	-0.777969	0.416794	0.195642	-1.29407	2	0	0.574365	0.198159	0.911702	0.730091
CNAG_01300	77	266	0.27239	-0.0857754	0.999845	0.752838	-0.3149	848	812	160.907	0.289398	-0.168734	0.858365	0.559859	-0.583051	142	70	1.96303	1.25771		0.521719	0.640699	106	31	1.90841	0.589633		0.757347	0.308966	390	281	2.08877	-0.714642		0.732249	-0.342136	541	576	1.90314	0.253775		0.89392	0.133345	1096	1153	1.89758	-0.0780641		0.967185
[truncated: 8,298 more rows]
[truncated: 24 more columns]
